# Supplementary material
Source: HighWire-hosted journal article supplement (doi:10.1101/rna.080633.125)
Supplement: Supplemental_Table_S1.xlsx [file Supplemental_Table_S1.xlsx]

## Sheet: Common
ACP	chr	position	Annotation	kmer	mm.Naive	mm.Jurkat	mm.NaiveIVT	mm.JurkatIVT	delta	N_reads_JurkatIVT	N_reads_NaiveIVT	N_reads_JurkatDRS	N_reads_NaiveDRS	color	BID.seq	CeU.seq	PRAISE	RBS.seq	N_orthogonal
AASDHPPTchr11106090565	chr11	106090565	AASDHPPT	GTTCA	35.1064	38.4858	1.49254	0	-3.37942	181	67	634	94	cyan	0	1	1	0	2
ABHD17Bchr971874728	chr9	71874728	ABHD17B	GATTA	54.386	26.9634	0	0	27.4226	59	13	382	57	cyan	0	0	0	0	0
ACTN1chr1468877104	chr14	68877104	ACTN1	CTTCA	47.0588	15	6.66667	0	32.0588	32	50	118	246	cyan	0	0	0	0	0
ADCK2chr7140673671	chr7	140673671	ADCK2	CCTAC	38.4615	23	8.33333	8.33333	15.4615	16	16	120	32	cyan	0	0	0	0	0
ADCY7chr1650290480	chr16	50290480	ADCY7	ATTCT	91.1765	90.9091	0	0	0.26738	11	11	33	34	cyan	0	0	0	0	0
AGPAT3chr2143982754	chr21	43982754	AGPAT3	CTTAA	31.8182	27.7778	1.6129	1.6129	4.0404	62	62	37	68	cyan	0	0	0	0	0
AIPchr1167491071	chr11	67491071	AIP	GCTTC	30.6452	22.1374	5.34351	7.03125	8.50776	154	160	208	96	cyan	0	0	0	0	0
AK2chr133014553	chr1	33014553	AK2	GTTCA	90.3475	93.2339	1.11111	0.91954	-2.88645	458	95	1755	262	cyan	1	1	1	0	3
AKNAchr9114359774	chr9	114359774	AKNA	TCTCC	27.907	35.7143	9.09091	9.09091	-7.80731	37	37	103	162	cyan	0	0	0	0	0
AKT2chr1940231796	chr19	40231796	AKT2	GTTAG	22.7273	45.2381	0	0	-22.5108	42	42	44	23	cyan	1	1	0	0	2
AMFRchr1656362360	chr16	56362360	AMFR	GTTCG	57.8947	59.3407	2.5641	2.5641	-1.44592	41	41	275	134	cyan	1	1	1	0	3
ANKLE2chr12132754847	chr12	132754847	ANKLE2	GATTT	32.7103	41.4747	2.7027	0	-8.76437	22	37	231	113	cyan	0	0	0	0	0
ANKMY1chr2240524147	chr2	240524147	ANKMY1	ACTCC	30.7692	16.6667	0	0	14.1026	25	25	27	22	cyan	0	0	0	0	0
ANKRD10chr13110892903	chr13	110892903	ANKRD10	GATTG	22.2222	31.8182	0	0	-9.59596	42	120	44	55	cyan	0	0	0	0	0
ANKRD10chr13110893156	chr13	110893156	ANKRD10	TTTCT	39.2405	31.7073	1.23457	1.25	7.53319	92	93	140	84	cyan	0	1	1	0	2
ANKRD12chr189281518	chr18	9281518	ANKRD12	GTTCA	91.4894	72.2222	0	0	19.2671	26	26	54	47	cyan	0	0	1	0	1
APBB1IPchr1026492395	chr10	26492395	APBB1IP	ACTCA	53.3333	16.9492	9.52381	9.52381	36.3842	46	46	66	43	cyan	0	0	0	0	0
ARAFchrX47571826	chrX	47571826	ARAF	GATTT	55	34.2857	0	0	20.7143	32	63	44	55	cyan	0	0	0	0	0
ARAP1chr1172686061	chr11	72686061	ARAP1	CTTCA	40	17.6471	4.16667	4.16667	22.3529	79	79	42	49	cyan	0	0	0	0	0
ARF6chr1449893896	chr14	49893896	ARF6	CTTAC	20.9184	32.5991	0	0	-11.6808	64	71	238	200	cyan	0	0	0	0	0
ARFGAP1chr2063289317	chr20	63289317	ARFGAP1	CTTTG	30.7692	20.4082	7.5	7.5	10.3611	77	77	169	45	cyan	0	0	0	0	0
ARFGAP1chr2063289376	chr20	63289376	ARFGAP1	GCTTG	40	27.6423	0	0	12.3577	53	16	140	28	cyan	0	0	0	0	0
ARFRP1chr2063699491	chr20	63699491	ARFRP1	CCTCC	40	18.1818	5.12821	5.12821	21.8182	58	58	37	34	cyan	0	0	0	0	0
ARHGAP25chr268822639	chr2	68822639	ARHGAP25	ACTTC	31.5789	42.8571	0	0	-11.2782	124	124	62	156	cyan	0	0	0	0	0
ARHGAP25chr268826420	chr2	68826420	ARHGAP25	GATTG	66.0714	83.0189	0.884956	0	-16.9474	17	115	53	171	cyan	0	0	0	0	0
ARID1Bchr6157208996	chr6	157208996	ARID1B	GATTG	44.4444	29.8507	0	0	14.5937	19	32	68	36	cyan	0	0	0	0	0
ARID5Achr296551612	chr2	96551612	ARID5A	ACTTC	72.7273	85.7143	0	0	-12.987	35	35	30	57	cyan	0	0	0	0	0
ASB6chr9129637527	chr9	129637527	ASB6	GATTG	27.451	44.4444	0	0	-16.9935	61	28	100	51	cyan	0	0	0	0	0
ASNSD1chr2189666200	chr2	189666200	ASNSD1	CTTAC	30.303	29.2135	1.5873	0	1.08955	80	66	97	39	cyan	0	0	0	0	0
ATG16L2chr1172829347	chr11	72829347	ATG16L2	CATGG	36.8421	24.2424	0	0	12.5997	12	11	40	26	cyan	0	0	0	0	0
ATP9Bchr1879307019	chr18	79307019	ATP9B	GTTCA	56.6038	46.8085	0	0	9.79526	37	37	47	53	cyan	0	0	1	0	1
ATXN2Lchr1628834688	chr16	28834688	ATXN2L	CCTCA	100	73.3333	0	0	26.6667	20	20	51	21	cyan	0	0	0	0	0
B4GAT1chr1166346956	chr11	66346956	B4GAT1	GATTA	33.3333	29.6053	0	0	3.72807	161	161	154	42	cyan	0	0	0	0	0
B9D2chr1941354942	chr19	41354942	B9D2	GATTT	30.4348	10.4167	0	0	20.0181	17	25	48	24	cyan	0	0	0	0	0
BCCIPchr10125836357	chr10	125836357	BCCIP	CTTTA	31.25	30.6122	3.44828	8.33333	0.637755	38	30	85	45	cyan	0	0	0	0	0
BCKDKchr1631112399	chr16	31112399	BCKDK	CTTAC	27.7778	32.2581	0	0	-4.48029	67	26	110	29	cyan	0	0	0	0	0
BCL2chr1863127177	chr18	63127177	BCL2	GATTA	24.6512	35.4839	2.32558	2.32558	-10.8327	44	44	31	216	cyan	0	0	0	0	0
BET1Lchr11204230	chr11	204230	BET1L	CTTCC	50	14.2857	9.09091	9.09091	35.7143	25	25	27	45	cyan	0	0	0	0	0
BORCS6chr178189203	chr17	8189203	BORCS6	CATGA	31.8182	23.8095	0	0	8.00866	54	54	23	28	cyan	0	0	0	0	0
BRCC3chrX155122510	chrX	155122510	BRCC3	CATTC	30.4348	26.9231	0	0	3.51171	115	115	65	24	cyan	0	0	0	0	0
BTN3A1chr626413438	chr6	26413438	BTN3A1	GATTC	20.4301	55.1724	0	0	-34.7423	22	26	69	115	cyan	0	0	0	0	0
C19orf25chr191474779	chr19	1474779	C19orf25	CATTA	32.4324	36.5854	0	0	-4.15293	82	55	43	41	cyan	0	0	0	0	0
C1orf122chr137809104	chr1	37809104	C1orf122	TCTCC	11.1111	35.5932	3.57143	3.57143	-24.4821	76	76	106	30	cyan	0	0	0	0	0
C21orf91chr2117793403	chr21	17793403	C21orf91	ACTTA	33.3333	58.8235	0	0	-25.4902	19	13	56	26	cyan	0	0	0	0	0
C2orf42chr270215492	chr2	70215492	C2orf42	GTTCA	17.8808	31.7829	1.5625	0	-13.9022	95	66	407	154	cyan	0	0	0	0	0
C7orf26chr76608329	chr7	6608329	C7orf26	ATTCT	76.1538	76.8707	0	0	-0.716902	21	31	149	132	cyan	0	1	1	0	2
CADchr227236432	chr2	27236432	CAD	CTTTG	40	20	0	0	20	53	53	200	41	cyan	0	0	0	0	0
CARD9chr9136361925	chr9	136361925	CARD9	TATCA	33.3333	23.3333	6.38298	6.38298	10	56	56	30	36	cyan	0	0	0	0	0
CCDC107chr935661044	chr9	35661044	CCDC107	CATGG	40.625	33.9286	0	7.84314	6.69643	53	40	67	37	cyan	0	0	0	0	0
CCDC22chrX49249707	chrX	49249707	CCDC22	GTTCG	38.5321	53.6232	0	0	-15.0911	22	26	138	109	cyan	0	0	1	0	1
CDK13chr740094403	chr7	40094403	CDK13	GATTG	23.2558	39.4161	0	0	-16.1602	49	49	137	45	cyan	0	0	0	0	0
CDKN1Bchr1212717387	chr12	12717387	CDKN1B	CTTCC	39.2857	38.0952	0	0	1.19048	13	13	24	40	cyan	0	0	0	0	0
CDV3chr3133588224	chr3	133588224	CDV3	GATTT	21.5116	30.7692	0	0	-9.2576	47	47	301	185	cyan	0	0	0	0	0
CENPBchr203784389	chr20	3784389	CENPB	CCTCA	37.2093	34.0659	5.88235	5.88235	3.14337	18	18	112	50	cyan	0	0	0	0	0
CENPS-CORTchr110431372	chr1	10431372	CENPS-CORT	GTTCA	100	98.6047	8.33333	0	1.39535	98	12	215	23	cyan	0	0	1	0	1
CENPSchr110431372	chr1	10431372	CENPS	GTTCA	100	98.6047	8.33333	0	1.39535	98	12	215	23	cyan	0	0	0	0	0
CEP295chr1193721584	chr11	93721584	CEP295	TTTCC	42	25.641	0	0	16.359	21	21	82	60	cyan	0	0	0	0	0
CHD8chr1421385678	chr14	21385678	CHD8	ACTTC	92	82.1429	4.34783	4.34783	9.85714	47	47	130	64	cyan	0	0	0	0	0
CHMP7chr823246751	chr8	23246751	CHMP7	CCTTC	33.3333	11.1111	0	0	22.2222	15	29	106	90	cyan	0	0	0	0	0
CHTOPchr1153645392	chr1	153645392	CHTOP	CTTAC	28.125	33.3333	0	1.44928	-5.20833	157	78	224	80	cyan	0	0	0	0	0
CLPTM1Lchr51318257	chr5	1318257	CLPTM1L	CTTCG	80	75.6677	8.59375	8.59375	4.33234	141	141	428	38	cyan	0	0	0	0	0
CMPK1chr147333869	chr1	47333869	CMPK1	TCTCC	25.7143	32.1429	0	0	-6.42857	11	11	65	196	cyan	0	0	0	0	0
CMTM6chr332483072	chr3	32483072	CMTM6	GTTCA	13.1579	35.9823	0	1.47059	-22.8244	142	55	464	80	cyan	1	1	1	0	3
CNPchr1741968617	chr17	41968617	CNP	ACTTC	40	40	0	0	0	75	11	128	28	cyan	0	0	0	0	0
CRKLchr2220917951	chr22	20917951	CRKL	GTTCG	18.4211	35.3659	0	0	-16.9448	15	14	165	38	cyan	0	0	1	1	2
CRKLchr2220952486	chr22	20952486	CRKL	CTTAC	46.875	88.2979	0	0	-41.4229	59	59	100	33	cyan	0	0	0	0	0
CSNK1G2chr191980907	chr19	1980907	CSNK1G2	GCTTC	30.3371	31.8885	0	0	-1.55147	59	59	347	202	cyan	1	0	1	0	2
CTDNEP1chr177251659	chr17	7251659	CTDNEP1	TTTTC	33.3333	21.5054	6.25	6.25	11.828	58	58	145	87	cyan	0	0	0	0	0
CTDNEP1chr177251727	chr17	7251727	CTDNEP1	CCTAG	31.8182	17.7419	0	0	14.0762	24	24	81	31	cyan	0	0	0	0	0
CTDSP2chr1257823560	chr12	57823560	CTDSP2	CTTTC	34.375	36.3636	0	0	-1.98864	72	72	55	81	cyan	0	0	0	0	0
CTDSP2chr1257846595	chr12	57846595	CTDSP2	CCTTC	50	66.6667	0	0	-16.6667	34	34	50	61	cyan	0	0	0	0	0
CUL2chr1035010223	chr10	35010223	CUL2	CATAA	33.3333	30	0	4.34783	3.33333	62	18	218	36	cyan	0	0	0	0	0
DCAF5chr1469054177	chr14	69054177	DCAF5	GCTTA	51.6129	30	2.12766	2.12766	21.6129	52	52	29	40	cyan	0	0	0	0	0
DCTPP1chr1630424267	chr16	30424267	DCTPP1	CATTC	22.7273	32.7103	0	1.2766	-9.98301	264	32	247	23	cyan	0	0	0	0	0
DDHD2chr838238134	chr8	38238134	DDHD2	GTTCA	42	23.6025	0	0	18.3975	24	19	161	50	cyan	0	1	1	0	2
DDX19Achr1670372461	chr16	70372461	DDX19A	CCTTC	22.5806	40	3.8961	3.8961	-17.4194	119	119	48	35	cyan	0	0	0	0	0
DDX27chr2049226443	chr20	49226443	DDX27	CATGG	13.6364	36.3636	5.19481	5.19481	-22.7273	101	101	22	30	cyan	0	0	0	0	0
DDX55chr12123620172	chr12	123620172	DDX55	CATAG	35.7143	38.8889	7.5	7.5	-3.1746	41	41	111	24	cyan	0	0	0	0	0
DENRchr12122762839	chr12	122762839	DENR	TCTCC	50	33.3333	0	0	16.6667	142	40	480	139	cyan	0	0	0	0	0
DGCR2chr2219038028	chr22	19038028	DGCR2	TCTCC	12.5	40	6.25	6.25	-27.5	50	50	30	28	cyan	0	0	0	0	0
DHX30chr347846614	chr3	47846614	DHX30	AATGT	31.746	38.5882	0	0.641026	-6.8422	164	32	453	69	cyan	1	1	1	0	3
DHX38chr1672112467	chr16	72112467	DHX38	CCTCG	42.8571	20	7.69231	7.69231	22.8571	49	49	38	29	cyan	0	0	0	0	0
DKC1chrX154765961	chrX	154765961	DKC1	GTTCA	80.3571	78.119	0	1.29032	2.23814	156	22	526	56	cyan	0	1	1	0	2
DLSTchr1474903249	chr14	74903249	DLST	CATTG	37.5	13.0435	6.66667	6.66667	24.4565	41	41	51	47	cyan	0	0	0	0	0
DMAC1chr97796614	chr9	7796614	DMAC1	GTTCA	77.6119	81.0811	0	0	-3.46914	13	43	38	67	cyan	0	0	0	0	0
DNAJB2chr2219283205	chr2	219283205	DNAJB2	CTTTG	12.5	33.3333	0	0	-20.8333	12	12	21	24	cyan	0	0	0	0	0
DNAJC4chr1164230919	chr11	64230919	DNAJC4	CCTCG	91.3043	92.8571	0	0	-1.5528	14	19	66	75	cyan	0	0	1	0	1
DNLZchr9136361925	chr9	136361925	DNLZ	TATCA	33.3333	23.3333	6.38298	6.38298	10	56	56	30	36	cyan	0	0	0	0	0
EHMT1chr9137817471	chr9	137817471	EHMT1	CATGG	31.0345	16.6667	9.67742	9.67742	14.3678	35	35	58	35	cyan	0	0	0	0	0
EIF2B1chr12123630491	chr12	123630491	EIF2B1	CATAG	42.8571	18.5185	0	0	24.3386	66	17	169	42	cyan	0	0	0	0	0
EIF4EBP2chr1070422028	chr10	70422028	EIF4EBP2	GTTCA	98.9362	95.8995	2.04082	1.16279	3.0367	172	49	757	282	cyan	0	0	1	0	1
ELAVL1chr197991732	chr19	7991732	ELAVL1	CCTCA	37.5	24.6914	0	0	12.8086	18	18	173	23	cyan	0	0	0	0	0
ELMO2chr2046367322	chr20	46367322	ELMO2	GATTT	28.5714	38.2353	0	0	-9.66387	63	33	70	31	cyan	0	0	0	0	0
ERBINchr566053793	chr5	66053793	ERBIN	CATTC	31.8182	33.3333	0	0	-1.51515	24	24	31	27	cyan	0	0	0	0	0
ERHchr1469380270	chr14	69380270	ERH	GTTCC	44	26.4228	0	0.459888	17.5772	1995	291	2714	268	cyan	1	1	1	0	3
ERP29chr12112022243	chr12	112022243	ERP29	CTTTG	48.1481	40.4762	6.89655	9.52381	7.67196	23	33	51	104	cyan	0	0	0	0	0
ESRRAchr1164316422	chr11	64316422	ESRRA	CATTG	25	45.4545	5.26316	5.26316	-20.4545	34	34	71	34	cyan	0	0	0	0	0
EXOSC6chr1670250340	chr16	70250340	EXOSC6	ACTTA	43.4783	72.7273	4	4	-29.249	25	25	45	49	cyan	0	0	0	0	0
EXTL3chr828753642	chr8	28753642	EXTL3	CATTG	33.3333	18.1818	7.69231	7.69231	15.1515	72	72	97	30	cyan	0	0	0	0	0
FAAP100chr1781540432	chr17	81540432	FAAP100	GATTT	36.6667	66.6667	0	0	-30	28	18	43	35	cyan	0	0	0	0	0
FAM104BchrX55146072	chrX	55146072	FAM104B	ACTTC	43.75	30.1887	0	1.78571	13.5613	115	27	106	28	cyan	0	0	0	0	0
FAM107Bchr1014520943	chr10	14520943	FAM107B	ACTTA	59.2949	66.3717	0.904977	0.904977	-7.07681	224	224	119	333	cyan	0	0	0	0	0
FAM110Achr20845422	chr20	845422	FAM110A	TTTAA	40	18.0328	5.71429	5.71429	21.9672	39	39	63	44	cyan	0	0	0	0	0
FAM168Bchr2131049504	chr2	131049504	FAM168B	TGTGA	52.6316	44.9153	0	0	7.71632	44	17	126	62	cyan	1	1	1	1	4
FAM168Bchr2131049506	chr2	131049506	FAM168B	TCTGT	35.4839	30.2326	7.69231	0	5.25131	49	13	136	47	cyan	0	0	0	0	0
FAM220Achr76329577	chr7	6329577	FAM220A	CATAA	16.129	37.3134	8.33333	0	-21.1844	20	12	86	38	cyan	0	0	0	0	0
FAM98Cchr1938405598	chr19	38405598	FAM98C	CCTCA	36.3636	10	4.16667	4.16667	26.3636	41	41	42	26	cyan	0	0	0	0	0
FBXW5chr9136940954	chr9	136940954	FBXW5	TCTCC	15.3846	31.5789	0	0	-16.1943	11	13	63	45	cyan	0	0	0	0	0
FBXW5chr9136942084	chr9	136942084	FBXW5	CTTCA	33.3333	17.6471	6.06061	6.06061	15.6863	58	58	35	25	cyan	0	0	0	0	0
FCGRTchr1949513897	chr19	49513897	FCGRT	CCTCC	30.303	11.3924	4.54545	3.44828	18.9106	44	36	122	137	cyan	0	0	0	0	0
FDPSchr1155318887	chr1	155318887	FDPS	CTTTC	33.3333	16.3424	6.66667	9.78261	16.9909	363	24	551	32	cyan	0	0	0	0	0
FDXACB1chr11111875707	chr11	111875707	FDXACB1	ACTTC	43.75	38.0952	9.09091	0	5.65476	13	13	38	22	cyan	0	0	0	0	0
FEM1Achr194794898	chr19	4794898	FEM1A	CATAG	30.4348	20.2899	6.25	6.25	10.1449	38	38	166	38	cyan	0	0	0	0	0
FLAD1chr1154988650	chr1	154988650	FLAD1	CGTAG	33.9623	35.2941	8.57143	8.16327	-1.33185	53	37	159	61	cyan	0	0	0	0	0
FNBP1chr9129888570	chr9	129888570	FNBP1	ACTTC	39.3939	47.7273	4.54545	0	-8.33333	33	22	85	42	cyan	0	0	0	0	0
FNBP4chr1147723193	chr11	47723193	FNBP4	CCTTG	36.5854	14.7059	4	4	21.8795	51	51	49	68	cyan	0	0	0	0	0
FPGSchr9127813665	chr9	127813665	FPGS	CTTAC	29.1667	35.6164	9.09091	0	-6.44977	34	16	123	32	cyan	0	0	0	0	0
FRAT2chr1097333527	chr10	97333527	FRAT2	GATTG	42.8571	52.381	0	0	-9.52381	15	15	42	42	cyan	0	0	0	0	0
GCHFRchr1540767599	chr15	40767599	GCHFR	TGTAG	14.3885	32.5581	0	0	-18.1697	30	77	45	140	cyan	0	1	1	0	2
GEMIN4chr17746887	chr17	746887	GEMIN4	ACTTC	40	55.9524	4.09357	4.09357	-15.9524	186	186	199	36	cyan	0	0	0	0	0
GIMAP2chr7150692760	chr7	150692760	GIMAP2	GATTA	18.398	42.6263	0.537634	0.549451	-24.2283	182	377	522	842	cyan	0	0	0	0	0
GIMAP6chr7150627705	chr7	150627705	GIMAP6	ACTTG	35.8974	10.3448	4.42478	4.42478	25.5526	113	113	29	40	cyan	0	0	0	0	0
GLUD1chr1087094570	chr10	87094570	GLUD1	CTTCA	35	27.7778	6.25	6.25	7.22222	59	59	200	66	cyan	0	0	0	0	0
GNA12chr72728859	chr7	2728859	GNA12	ACTTC	18.5185	47.2222	0.78125	0.78125	-28.7037	130	130	70	41	cyan	0	0	0	0	0
GNASchr2058891356	chr20	58891356	GNAS	TTTTG	45	54.1667	4.34783	4.34783	-9.16667	29	29	40	25	cyan	0	0	0	0	0
GNASchr2058891543	chr20	58891543	GNAS	CTTCC	41.9355	30.0752	7.69231	7.69231	11.8603	61	61	1298	573	cyan	0	0	0	0	0
GNASchr2058891728	chr20	58891728	GNAS	CATGG	25.0871	43.0127	6.25	0	-17.9256	46	25	1621	713	cyan	0	0	0	0	0
GNPDA2chr444722128	chr4	44722128	GNPDA2	GTTCA	34.2105	26.0504	0	2.63158	8.16011	38	18	126	42	cyan	0	0	0	0	0
GOLPH3chr532126529	chr5	32126529	GOLPH3	ACTTC	25	30.6452	0	0	-5.64516	51	36	128	80	cyan	0	0	0	0	0
GRAPchr1719021896	chr17	19021896	GRAP	CATGG	26	36.8421	0	0	-10.8421	36	44	24	63	cyan	0	0	0	0	0
GRINAchr8143992928	chr8	143992928	GRINA	CCTCT	30.4348	19.5122	9.09091	9.09091	10.9226	189	189	148	102	cyan	0	0	0	0	0
GRK6chr5177442519	chr5	177442519	GRK6	TTTCA	43.617	30.3571	4.54545	4.54545	13.2599	24	24	179	102	cyan	0	0	0	0	0
GRWD1chr1948451227	chr19	48451227	GRWD1	GTTCA	37.0787	22.5532	0	0	14.5255	97	14	470	89	cyan	0	1	1	0	2
GRWD1chr1948453149	chr19	48453149	GRWD1	GATTC	85.0746	86.4353	0	0	-1.3607	114	16	322	68	cyan	0	0	0	0	0
GTF2F1chr196380291	chr19	6380291	GTF2F1	CCTCA	37.5	31.8182	0	0	5.68182	28	16	107	68	cyan	0	0	0	0	0
GTF3C2chr227326828	chr2	27326828	GTF3C2	GTTCG	95.6522	98.3333	0	0	-2.68116	37	23	301	69	cyan	1	1	1	1	4
GTPBP1chr2238728017	chr22	38728017	GTPBP1	ATTCT	57.1429	50.8475	0	0	6.2954	21	21	62	28	cyan	0	1	1	0	2
GUCD1chr2224541687	chr22	24541687	GUCD1	GGTCT	76.3158	84.4262	0	0	-8.11044	126	126	295	45	cyan	0	1	1	0	2
HECTD1chr1431101239	chr14	31101239	HECTD1	GTTCA	39.1304	27.1028	4.7619	0	12.0276	14	22	221	94	cyan	1	0	1	0	2
HINFPchr11119134666	chr11	119134666	HINFP	ACTTC	44.4444	25.7143	0	0	18.7302	30	22	57	28	cyan	0	0	0	0	0
HIRIP3chr1629993045	chr16	29993045	HIRIP3	TTTAA	34.7826	16.4286	0	9.09091	18.354	58	13	157	24	cyan	0	0	0	0	0
HNRNPA1L2chr1352643231	chr13	52643231	HNRNPA1L2	GATTT	35.7143	37.7358	0	0	-2.02156	15	14	53	29	cyan	0	0	0	0	0
HPS4chr2226452838	chr22	26452838	HPS4	GTTCA	32.7273	35.7639	0	0	-3.03662	77	16	312	66	cyan	0	1	1	0	2
IDI1chr101044099	chr10	1044099	IDI1	GTTCA	75	95.8531	0	0.39604	-20.8531	520	59	849	72	cyan	0	1	1	0	2
ILF3chr1910691234	chr19	10691234	ILF3	ACTTC	59.4595	58.4615	2.12766	2.12766	0.997921	99	99	94	49	cyan	0	0	0	0	0
INSIG2chr2118096522	chr2	118096522	INSIG2	TTTTT	33.3333	26.6667	0	0	6.66667	27	13	98	31	cyan	0	0	0	0	0
INTS1chr71476655	chr7	1476655	INTS1	GTTCG	100	98.9796	0	0	1.02041	23	23	197	88	cyan	1	1	1	1	4
IPO4chr1424183043	chr14	24183043	IPO4	CCTCA	50	12.5	8	8	37.5	52	52	65	22	cyan	0	0	0	0	0
IPO7chr119428571	chr11	9428571	IPO7	CATGT	32	20.354	7.95455	7.95455	11.646	91	91	123	26	cyan	0	0	0	0	0
IPO9chr1201876389	chr1	201876389	IPO9	GATTA	37.037	49.1803	0	0	-12.1433	26	22	128	27	cyan	0	0	0	0	0
IRF2BP2chr1234607415	chr1	234607415	IRF2BP2	ACTCC	24.359	45.7143	5.08475	5.08475	-21.3553	64	64	186	265	cyan	0	0	0	0	0
ISG20L2chr1156727626	chr1	156727626	ISG20L2	GATTT	30.6122	27.8481	0	0	2.76414	61	27	83	50	cyan	0	0	0	0	0
ITGA5chr1254395927	chr12	54395927	ITGA5	ACTTC	15	44.4444	0	0	-29.4444	14	18	51	23	cyan	0	0	0	0	0
ITGA5chr1254404214	chr12	54404214	ITGA5	CCTCA	50	25	0	0	25	19	19	51	26	cyan	0	0	0	0	0
JADE2chr5134579202	chr5	134579202	JADE2	CTTCT	30.303	33.3333	9.09091	9.09091	-3.0303	16	16	30	40	cyan	0	0	0	0	0
JAK1chr164834378	chr1	64834378	JAK1	ACTTC	26.0274	39.7849	0.8	0	-13.7575	43	131	137	430	cyan	0	0	0	0	0
KLF2chr1916324905	chr19	16324905	KLF2	CTTTC	23.0769	42.8571	0	0	-19.7802	19	19	22	510	cyan	0	0	0	0	0
KMT5Bchr1168158050	chr11	68158050	KMT5B	GATTT	19.3548	35	0	0	-15.6452	47	47	40	31	cyan	0	0	0	0	0
KRASchr1225207873	chr12	25207873	KRAS	TTTCC	33.3333	14.0625	0	0	19.2708	16	16	107	25	cyan	0	0	0	0	0
KRI1chr1910554196	chr19	10554196	KRI1	GCTTG	25	45.4545	9.7561	9.7561	-20.4545	42	42	35	24	cyan	0	0	0	0	0
LEPROTL1chr830105894	chr8	30105894	LEPROTL1	ACTTC	33.2103	48.3333	1.16034	0.934579	-15.123	120	1075	152	673	cyan	0	0	0	0	0
LIMA1chr1250175912	chr12	50175912	LIMA1	TTTTC	20	42.8571	7.84314	7.84314	-22.8571	144	144	63	33	cyan	0	0	0	0	0
LMF2chr2250503188	chr22	50503188	LMF2	ACTCC	32.2581	42.8571	3.33333	8.33333	-10.5991	17	35	71	56	cyan	0	0	0	0	0
LRRC8Dchr189935365	chr1	89935365	LRRC8D	CATTC	30.5556	50	0	0	-19.4444	126	126	44	42	cyan	0	0	0	0	0
LY9chr1160827979	chr1	160827979	LY9	ACTCC	32.1429	12.5	0	0	19.6429	13	65	36	141	cyan	0	0	0	0	0
LYSMD2chr1551725012	chr15	51725012	LYSMD2	ACTTA	71.6981	81.5	2.04082	0	-9.80189	50	98	203	107	cyan	0	0	0	0	0
MAMDC2chr970217316	chr9	70217316	MAMDC2	CCTTT	14.8148	43.75	4.7619	0	-28.9352	18	22	21	32	cyan	0	0	0	0	0
MAP2K3chr1721314160	chr17	21314160	MAP2K3	CTTCA	36.3636	35	8.33333	8.33333	1.36364	53	53	50	28	cyan	0	0	0	0	0
MAP2K3chr1721314644	chr17	21314644	MAP2K3	CTTTG	33.3333	21.2121	3.8835	3.8835	12.1212	113	113	60	41	cyan	0	0	0	0	0
MAP3K11chr1165598392	chr11	65598392	MAP3K11	ACTCC	41.6667	44.2308	6.25	6.25	-2.5641	38	38	105	72	cyan	0	0	0	0	0
MAP3K11chr1165598520	chr11	65598520	MAP3K11	CCTTC	42.1053	29.0323	7.69231	7.69231	13.073	13	13	33	21	cyan	0	0	0	0	0
MAP3K3chr1763693691	chr17	63693691	MAP3K3	ACTTC	33.3333	47.0588	0	0	-13.7255	21	21	39	50	cyan	0	0	0	0	0
MAP7D3chrX136218317	chrX	136218317	MAP7D3	GTTAA	52.381	45.122	0	0	7.259	36	36	83	21	cyan	0	0	1	0	1
MAPK3chr1630117205	chr16	30117205	MAPK3	CCTCC	40.5797	86.6071	9.72222	9.72222	-46.0274	82	82	262	73	cyan	0	0	0	0	0
MAPKAPK2chr1206734115	chr1	206734115	MAPKAPK2	CCTCA	66.6667	30	0	0	36.6667	33	33	53	27	cyan	0	0	0	0	0
MCM2chr3127621806	chr3	127621806	MCM2	GATTC	15	45.4265	0.128535	0.128535	-30.4265	979	979	1051	24	cyan	0	0	0	0	0
MCM3APchr2146270549	chr21	46270549	MCM3AP	GTTCC	37.5	20.5882	0	0	16.9118	41	41	73	25	cyan	1	1	1	0	3
MED1chr1739406139	chr17	39406139	MED1	GATTC	13.7931	41.7266	0	0	-27.9335	11	11	172	32	cyan	0	0	0	0	0
MED16chr19881573	chr19	881573	MED16	GTTCT	17.6471	36.2162	0	0	-18.5692	58	22	204	79	cyan	1	0	1	0	2
MEX3Cchr1851175500	chr18	51175500	MEX3C	GTTCA	98.2609	58.7432	0	0	39.5177	34	34	370	116	cyan	1	0	1	0	2
MFHAS1chr88890465	chr8	8890465	MFHAS1	GATTA	12.6984	33.4884	3.0303	3.0303	-20.79	35	35	215	65	cyan	0	0	0	0	0
MGAT1chr5180792320	chr5	180792320	MGAT1	ACTTC	50	66.6667	0	0	-16.6667	16	20	87	79	cyan	0	0	0	0	0
MID1IP1chrX38805029	chrX	38805029	MID1IP1	CATGG	17.8571	40.7407	1.38889	1.38889	-22.8836	83	83	269	50	cyan	0	0	0	0	0
MINK1chr174897938	chr17	4897938	MINK1	CCTTG	35.2941	23.8095	9.09091	9.09091	11.4846	30	30	29	32	cyan	0	0	0	0	0
MKNK2chr192038712	chr19	2038712	MKNK2	CCTTC	31.4286	13.4615	0	0	17.967	15	15	68	45	cyan	0	0	0	0	0
MLYCDchr1683916136	chr16	83916136	MLYCD	CATAA	50	20	0	0	30	11	11	55	22	cyan	0	0	0	0	0
MOB3Achr192071285	chr19	2071285	MOB3A	ACTCC	32.3529	25	3.44828	0	7.35294	27	59	53	52	cyan	0	0	0	0	0
MOGSchr274461645	chr2	74461645	MOGS	CATTC	27.2727	50.9091	0	0	-23.6364	35	17	60	36	cyan	0	0	0	0	0
MORF4L2chrX103676823	chrX	103676823	MORF4L2	CTTCA	33.3333	45.4545	0	0	-12.1212	62	12	312	46	cyan	0	0	0	0	0
MRPL4chr1910258579	chr19	10258579	MRPL4	GTTCA	75	69.3548	0	3.22581	5.64516	31	14	62	28	cyan	0	0	0	0	0
MSL1chr1740126187	chr17	40126187	MSL1	CCTTG	40.7407	28.125	0	0	12.6157	12	12	85	71	cyan	0	0	0	0	0
MSL2chr3136195281	chr3	136195281	MSL2	GATTG	25	33.0357	0	0	-8.03571	33	33	120	28	cyan	0	0	0	0	0
MT-CO1chrM6293	chrM	6293	MT-CO1	CCTCC	38.5542	13.1902	5.92593	8.60927	25.364	469	435	2855	4412	cyan	0	0	0	0	0
MTA1chr14105470324	chr14	105470324	MTA1	CCTCA	31.4286	14.2857	8.33333	8.33333	17.1429	23	23	208	64	cyan	0	0	0	0	0
MTMR3chr2230007317	chr22	30007317	MTMR3	GTTCG	92.5926	88.3721	0	0	4.2205	34	34	43	27	cyan	0	0	1	0	1
MUL1chr120499958	chr1	20499958	MUL1	ACTCC	33.3333	26.3158	0	0	7.01754	61	61	56	21	cyan	0	0	0	0	0
MUL1chr120500634	chr1	20500634	MUL1	GATTT	44.4444	47.4576	0	0	-3.01318	39	14	65	28	cyan	0	0	0	0	0
MZT2Achr2131483985	chr2	131483985	MZT2A	CTTTC	30.303	12.0879	7.40741	4	18.2151	131	59	205	38	cyan	0	0	0	0	0
NCAPH2chr2250519195	chr22	50519195	NCAPH2	CCTCT	31.5789	19.4444	8	8	12.1345	75	75	100	25	cyan	0	0	0	0	0
NCOA5chr2046061367	chr20	46061367	NCOA5	ACTTC	33.3333	37.3134	3.63636	3.63636	-3.9801	57	57	85	36	cyan	0	0	0	0	0
NDRG1chr8133262056	chr8	133262056	NDRG1	CTTCC	35.7143	23.0769	0	0	12.6374	15	15	56	63	cyan	0	0	0	0	0
NDRG1chr8133262057	chr8	133262057	NDRG1	CCTTC	27.2727	33.3333	0	0	-6.06061	15	15	50	59	cyan	0	0	0	0	0
NELFAchr41983321	chr4	1983321	NELFA	CCTAG	36.3636	19.2308	8.82353	8.82353	17.1329	92	92	55	21	cyan	0	0	0	0	0
NELFBchr9137273146	chr9	137273146	NELFB	CCTTG	33.3333	22.7273	9.09091	9.09091	10.6061	75	75	108	49	cyan	0	0	0	0	0
NFKB2chr10102402515	chr10	102402515	NFKB2	CTTCC	42.8571	42.8571	0	0	0	14	14	22	36	cyan	0	0	0	0	0
NIP7chr1669342144	chr16	69342144	NIP7	GTTCA	100	99.4737	0	0	0.526316	127	48	381	60	cyan	0	1	1	0	2
NME6chr348294601	chr3	48294601	NME6	ACTTC	37.5	20	5	0	17.5	18	20	40	25	cyan	0	0	0	0	0
NMT1chr1745106544	chr17	45106544	NMT1	CCTTG	42.8571	21.7391	0	0	21.118	19	19	77	30	cyan	0	0	0	0	0
NMT1chr1745108160	chr17	45108160	NMT1	CCTCC	35.7143	37.931	6.25	6.25	-2.21675	28	28	50	25	cyan	0	0	0	0	0
NOD1chr730425180	chr7	30425180	NOD1	GATTA	31.4286	32.5581	0	0	-1.12957	64	64	43	35	cyan	0	0	0	0	0
NUCB1chr1948923063	chr19	48923063	NUCB1	CCTCT	20	60	7.89474	7.89474	-40	82	82	39	47	cyan	0	0	0	0	0
NUP210chr313371848	chr3	13371848	NUP210	GTTCC	19.0476	62.3188	0	0	-43.2712	28	31	266	44	cyan	1	0	1	1	3
OSTF1chr975117511	chr9	75117511	OSTF1	GTTAA	32.3077	14.7752	0	1.20482	17.5325	168	83	470	67	cyan	0	0	1	0	1
OXLD1chr1781665184	chr17	81665184	OXLD1	ACTCC	33.8983	38.3333	6.42202	2.35294	-4.43503	94	123	92	84	cyan	0	0	0	0	0
PARP10chr8143977516	chr8	143977516	PARP10	CCTCT	48.5714	26.9231	6.25	6.25	21.6484	23	23	38	47	cyan	0	0	0	0	0
PARP4chr1324426505	chr13	24426505	PARP4	GTTCA	96.1832	81.2698	0	0	14.9134	55	26	317	131	cyan	1	1	1	1	4
PARVGchr2244183345	chr22	44183345	PARVG	TCTTG	23.0769	32.2581	5	8.33333	-9.18114	41	33	105	91	cyan	0	0	0	0	0
PCBP2chr1253452239	chr12	53452239	PCBP2	CCTCC	32.6733	27.6786	0	0	4.9947	18	18	193	181	cyan	0	0	0	0	0
PCK2chr1424103548	chr14	24103548	PCK2	CCTTT	33.3333	14.2857	0	0	19.0476	34	16	93	31	cyan	0	0	0	0	0
PDE3Bchr1114643867	chr11	14643867	PDE3B	CCTTC	28.2051	38.7097	8.69565	8.69565	-10.5045	30	30	42	57	cyan	0	0	0	0	0
PDE3Bchr1114644571	chr11	14644571	PDE3B	ACTTC	82.7586	81.25	3.33333	3.33333	1.50862	37	37	22	37	cyan	0	0	0	0	0
PEX14chr110630335	chr1	10630335	PEX14	TCTTG	37.5	16.6667	0	0	20.8333	12	19	103	51	cyan	0	0	0	0	0
PHF13chr16623607	chr1	6623607	PHF13	GTTCG	71.4286	57.5472	0.884956	0.884956	13.8814	113	113	213	28	cyan	0	1	1	0	2
PI4KBchr1151315962	chr1	151315962	PI4KB	ACTTC	17.3913	30.303	1.75439	1.75439	-12.9117	57	57	38	27	cyan	0	0	0	0	0
PIK3CBchr3138699073	chr3	138699073	PIK3CB	TCTTC	40	15	0	0	25	22	22	75	33	cyan	0	0	0	0	0
PIP5K1Bchr968780672	chr9	68780672	PIP5K1B	GATTG	20.9877	31.1594	0	0	-10.1718	67	31	138	82	cyan	0	0	0	0	0
PITPNC1chr1767377583	chr17	67377583	PITPNC1	TCTTG	39.1304	27.2727	0	0	11.8577	24	24	57	78	cyan	0	0	0	0	0
PITPNC1chr1767378048	chr17	67378048	PITPNC1	GCTCC	46.4481	37.6812	4.16667	4.16667	8.76693	50	50	86	208	cyan	0	0	0	0	0
PLD3chr1940378040	chr19	40378040	PLD3	GCTGG	38.5113	49.2857	0	0	-10.7744	107	222	284	316	cyan	1	0	1	0	2
PLEKHM2chr115727280	chr1	15727280	PLEKHM2	CATGG	18.75	47.9167	0	0	-29.1667	11	11	80	32	cyan	0	0	0	0	0
PLEKHM2chr115727773	chr1	15727773	PLEKHM2	GATTC	32.8571	54.3307	0	0	-21.4736	39	39	141	76	cyan	0	0	0	0	0
PLEKHO2chr1564865804	chr15	64865804	PLEKHO2	GATTT	33.3333	14.2857	0	0	19.0476	51	51	42	21	cyan	0	0	0	0	0
PMM2chr168847970	chr16	8847970	PMM2	ACTTC	22.2222	32.1429	0	0	-9.92063	33	16	100	48	cyan	0	0	0	0	0
PNPLA8chr7108472423	chr7	108472423	PNPLA8	ACTTC	14.2857	47.8261	2.94118	0	-33.5404	24	34	56	35	cyan	0	0	0	0	0
POGKchr1166854177	chr1	166854177	POGK	GTTCA	98.4	98.2517	0	0	0.148252	47	31	572	125	cyan	0	1	1	0	2
POLDIP3chr2242585607	chr22	42585607	POLDIP3	CTTCT	35	11.6279	6.15385	6.15385	23.3721	72	72	57	23	cyan	0	0	0	0	0
POLR1Cchr643519879	chr6	43519879	POLR1C	GTTCA	92	79.6296	5.26316	0	12.3704	29	19	54	25	cyan	0	0	0	0	0
POLR1Dchr1327665998	chr13	27665998	POLR1D	CTTCG	40.9091	18.75	9.375	9.375	22.1591	104	104	64	27	cyan	0	0	0	0	0
POLR2Dchr2127847170	chr2	127847170	POLR2D	GATTT	25.9259	57.7143	0	0	-31.7884	177	35	180	54	cyan	0	0	0	0	0
PORchr775984811	chr7	75984811	POR	CCTAC	31.0345	17.8571	0	0	13.1773	15	12	104	72	cyan	0	0	0	0	0
PORchr775984818	chr7	75984818	POR	CCTAC	43.5897	41.8182	9.18728	9.18728	1.77156	288	288	57	40	cyan	0	0	0	0	0
PORchr775985753	chr7	75985753	POR	CCTTC	25	48	8.33333	8.33333	-23	167	167	46	25	cyan	0	0	0	0	0
PPM1Achr1460283300	chr14	60283300	PPM1A	GATTT	53.125	61.2903	0	0	-8.16532	24	19	114	40	cyan	0	0	0	0	0
PPP1R8chr127850297	chr1	27850297	PPP1R8	ACTTG	36.3636	33.3333	0	4.34783	3.0303	23	17	88	31	cyan	0	0	0	0	0
PRKCQchr106498439	chr10	6498439	PRKCQ	TCTTC	10	33.3333	0	0	-23.3333	12	19	59	21	cyan	0	0	0	0	0
PRNPchr204699373	chr20	4699373	PRNP	CCTCA	35.2941	20	5.71429	5.71429	15.2941	118	118	27	40	cyan	0	0	0	0	0
PROSER1chr1339013235	chr13	39013235	PROSER1	GTTCA	66.6667	48.9011	2.63158	2.63158	17.7656	42	42	184	28	cyan	1	1	1	0	3
PRPSAP1chr1776311411	chr17	76311411	PRPSAP1	GATTG	48.4375	32.2404	0	0.546448	16.1971	183	169	183	66	cyan	0	0	0	0	0
PRR13chr1253443441	chr12	53443441	PRR13	GTTCC	90.1186	91.7146	1.51057	0.222717	-1.59604	450	332	871	507	cyan	0	1	1	0	2
PRUNE1chr1151008503	chr1	151008503	PRUNE1	GTTCG	90.9091	90.5263	0	0	0.382775	16	15	95	44	cyan	0	0	1	0	1
PSIP1chr915510300	chr9	15510300	PSIP1	CCTCC	36.3636	15.625	6.25	6.25	20.7386	53	53	97	32	cyan	0	0	0	0	0
PTOV1chr1949854451	chr19	49854451	PTOV1	CCTCA	70	64.2857	0	0	5.71429	30	30	189	34	cyan	0	0	0	0	0
PTPN7chr1202147365	chr1	202147365	PTPN7	ACTTC	45.8333	64.8084	0	1.63934	-18.975	127	20	538	79	cyan	0	0	0	0	0
PUF60chr8143816498	chr8	143816498	PUF60	ACTTG	46.1538	15.3846	0	0	30.7692	114	23	60	24	cyan	0	0	0	0	0
PURBchr744883235	chr7	44883235	PURB	GATTT	12.2449	55.2632	0	0	-43.0183	17	17	38	49	cyan	0	0	0	0	0
QRICH1chr349057344	chr3	49057344	QRICH1	ACTTA	32	32.7586	5.71429	5.71429	-0.758621	45	45	139	63	cyan	0	0	0	0	0
RAB35chr12120095734	chr12	120095734	RAB35	TCTCC	30	33.3333	5.55556	5.55556	-3.33333	28	28	61	29	cyan	0	0	0	0	0
RABGAP1chr9123104177	chr9	123104177	RABGAP1	CCTCA	36.8421	17.6471	8.33333	8.33333	19.195	18	18	66	26	cyan	0	0	0	0	0
RAVER1chr1910317761	chr19	10317761	RAVER1	CTTCC	30.303	34.0909	9.09091	9.09091	-3.78788	34	34	102	65	cyan	0	0	0	0	0
RBM14-RBM4chr1166643658	chr11	66643658	RBM14-RBM4	GATTC	29.661	32.9016	0	0.806452	-3.24054	192	66	529	182	cyan	0	0	0	0	0
RBM4chr1166643658	chr11	66643658	RBM4	GATTC	29.661	32.9016	0	0.806452	-3.24054	192	66	529	182	cyan	0	0	0	0	0
RELAchr1165654307	chr11	65654307	RELA	GATTC	31.6327	53.9326	0	0	-22.2999	54	113	112	107	cyan	0	0	0	0	0
RETREG1chr516474820	chr5	16474820	RETREG1	ACTTA	47.0588	60	0.735294	0	-12.9412	22	150	31	50	cyan	0	0	0	0	0
REV1chr299439094	chr2	99439094	REV1	GATTG	10.7143	34.7222	1.17647	0	-24.0079	30	85	72	58	cyan	0	0	0	0	0
RHBDD2chr775888787	chr7	75888787	RHBDD2	TGTAG	23.9583	75.9531	0	0.595238	-51.9947	169	110	344	195	cyan	0	1	1	0	2
RHOFchr12121779253	chr12	121779253	RHOF	ACTCG	12.963	33.3333	0	0	-20.3704	34	55	53	87	cyan	0	0	0	0	0
RIOX1chr1473492397	chr14	73492397	RIOX1	GATTA	36.6197	44	4.34783	4.34783	-7.38028	24	24	181	75	cyan	0	0	0	0	0
RIPK1chr63114074	chr6	3114074	RIPK1	GATTT	48.8372	39.3939	0	0	9.44327	71	71	35	49	cyan	0	0	0	0	0
RITA1chr12113191601	chr12	113191601	RITA1	CTTTC	37.5	37.8378	3.125	3.125	-0.337838	131	131	83	25	cyan	0	0	0	0	0
RNF167chr174944900	chr17	4944900	RNF167	GTTCT	39.4089	47.8261	1.14286	0.4329	-8.41722	231	175	599	406	cyan	0	1	1	0	2
RNF8chr637374622	chr6	37374622	RNF8	CATTG	16.6667	38.4615	6.25	6.25	-21.7949	103	103	114	24	cyan	0	0	0	0	0
RPLP2chr11809972	chr11	809972	RPLP2	TTTCC	31.8182	11.6667	4.50512	4.33514	20.1515	2421	2966	68	22	cyan	0	0	0	0	0
RPP25chr1574955682	chr15	74955682	RPP25	GATTC	20.6897	31.25	0	0	-10.5603	16	12	51	30	cyan	0	0	0	0	0
RPTORchr1780965041	chr17	80965041	RPTOR	TCTCA	66.6667	78.5714	0	0	-11.9048	23	23	39	22	cyan	0	0	0	0	0
RPUSD3chr39841823	chr3	9841823	RPUSD3	GTTCA	33.3333	49.1667	0	0	-15.8333	54	11	121	27	cyan	0	0	0	0	0
RRP7Achr2242512135	chr22	42512135	RRP7A	ACTTC	13.0435	37.931	0	0	-24.8876	22	19	87	55	cyan	0	0	0	0	0
RSBN1Lchr777778835	chr7	77778835	RSBN1L	GATTC	23.4043	44.4444	0	0	-21.0402	16	11	96	48	cyan	0	0	0	0	0
RTN4chr255050060	chr2	55050060	RTN4	ACTTC	35.1351	40.4255	4	1.75439	-5.2904	57	26	278	67	cyan	0	0	0	0	0
SATB1chr318348947	chr3	18348947	SATB1	GATTG	23.6842	35.9494	0.201207	0.537634	-12.2652	186	497	396	456	cyan	0	0	0	0	0
SCAF1chr1949654781	chr19	49654781	SCAF1	GTTCG	32	48.5714	0	0	-16.5714	27	27	140	75	cyan	0	1	1	0	2
SCAF1chr1949658592	chr19	49658592	SCAF1	CCTTC	41.6667	30.5085	6.66667	6.66667	11.1582	22	22	85	36	cyan	0	0	0	0	0
SCAMP2chr1574873230	chr15	74873230	SCAMP2	CTTCG	50	14.2857	0	9.09091	35.7143	24	12	58	30	cyan	0	0	0	0	0
SCO2chr2250523862	chr22	50523862	SCO2	ACTTC	77.7778	66.6667	1.2987	1.2987	11.1111	338	338	122	21	cyan	0	0	0	0	0
SCP2chr153027999	chr1	53027999	SCP2	GTTCC	41.2162	42.2371	0	0	-1.02085	309	74	603	296	cyan	0	1	1	0	2
SDHAF2chr1161446134	chr11	61446134	SDHAF2	CGTTA	33.3333	36.3636	0	0	-3.0303	139	206	125	89	cyan	0	0	0	0	0
SDHAF2chr1161446209	chr11	61446209	SDHAF2	CATAA	18.9189	32.4324	4.60829	2.74725	-13.5135	183	218	187	188	cyan	0	0	0	0	0
SEC16Achr9136440652	chr9	136440652	SEC16A	GTTCA	31.2139	15.6923	0	2.04082	15.5216	50	36	330	174	cyan	1	0	1	0	2
SELENOHchr1157741586	chr11	57741586	SELENOH	GCTCT	30.137	23.7443	4.08163	0	6.39269	187	161	245	85	cyan	0	0	1	0	1
SELPLGchr12108622575	chr12	108622575	SELPLG	ACTTC	49.5098	60.7143	3.43137	5.47945	-11.2045	74	207	96	242	cyan	0	0	0	0	0
SELPLGchr12108622607	chr12	108622607	SELPLG	CATTC	36.1446	32.3944	1.27389	2.94118	3.75021	70	165	91	210	cyan	0	0	0	0	0
SENP7chr3101325581	chr3	101325581	SENP7	GTTAA	71.9298	86.2745	0	0	-14.3447	20	12	51	58	cyan	0	0	1	0	1
SEPHS2chr1630445313	chr16	30445313	SEPHS2	ACTTC	45.4545	81.9672	0	2.94118	-36.5127	68	29	109	31	cyan	0	0	0	0	0
SF3A2chr192247965	chr19	2247965	SF3A2	CCTCA	100	44.4444	0	0	55.5556	92	92	296	103	cyan	0	0	0	0	0
SF3A2chr192248256	chr19	2248256	SF3A2	CATCA	34.375	20.5128	8.57143	8.57143	13.8622	38	38	94	38	cyan	0	0	0	0	0
SGSM2chr172375625	chr17	2375625	SGSM2	GTTCG	100	98.7179	0	0	1.28205	18	18	78	69	cyan	0	1	1	0	2
SH3BP5Lchr1248812159	chr1	248812159	SH3BP5L	GATTG	43.4783	34.0659	0	0	9.41233	35	35	91	23	cyan	0	0	0	0	0
SIGMAR1chr934635538	chr9	34635538	SIGMAR1	CATAC	30.3571	23.9583	7.69231	1.03093	6.39881	102	30	323	59	cyan	0	0	0	0	0
SIGMAR1chr934635718	chr9	34635718	SIGMAR1	ACTTC	21.0526	38.2151	0	0.657895	-17.1625	152	49	470	98	cyan	0	0	0	0	0
SLC25A17chr2240770636	chr22	40770636	SLC25A17	GATTT	30	35.6164	0	0.8	-5.61644	125	17	221	21	cyan	0	0	0	0	0
SLC2A1chr142926727	chr1	42926727	SLC2A1	GTTCC	58.8235	31.8182	2.0202	0	27.0053	19	118	117	24	cyan	1	1	1	1	4
SLC2A1chr142926879	chr1	42926879	SLC2A1	ACTTA	70.8333	57.9545	0.519481	0.519481	12.8788	389	389	91	28	cyan	0	0	0	0	0
SLC2A4RGchr2063741447	chr20	63741447	SLC2A4RG	CCTTC	50	18.75	9.09091	9.09091	31.25	15	15	23	37	cyan	0	0	0	0	0
SLC30A5chr569118621	chr5	69118621	SLC30A5	CATGT	36.3636	11.6279	3.57143	3.57143	24.7357	43	43	83	25	cyan	0	0	0	0	0
SLC30A5chr569123370	chr5	69123370	SLC30A5	TCTAC	65.625	64.1026	1.85185	1.85185	1.52244	62	62	118	35	cyan	0	0	0	0	0
SLC33A1chr3155828191	chr3	155828191	SLC33A1	CATTC	41.6667	51.5152	0	0	-9.84848	19	11	33	25	cyan	0	0	0	0	0
SLC43A1chr1157491356	chr11	57491356	SLC43A1	GTTCT	58.3333	67.6471	0	0	-9.31373	81	81	37	28	cyan	0	1	1	0	2
SMARCC1chr347588251	chr3	47588251	SMARCC1	CCTCC	18.75	34.2857	6.66667	6.66667	-15.5357	42	42	121	24	cyan	0	0	0	0	0
SMG9chr1943747990	chr19	43747990	SMG9	CCTCC	33.3333	15.7895	0	0	17.5439	72	72	80	23	cyan	0	0	0	0	0
SNNchr1611678315	chr16	11678315	SNN	CCTCA	36.3636	26.3158	0	0	10.0478	13	13	33	33	cyan	0	0	0	0	0
SPARTchr1336335261	chr13	36335261	SPART	GATTC	33.3333	37.5	0	0	-4.16667	27	36	81	67	cyan	0	0	0	0	0
SPPL2Bchr192337531	chr19	2337531	SPPL2B	GCTGG	50	55	0	0	-5	13	12	46	32	cyan	1	0	1	0	2
SPPL3chr12120764051	chr12	120764051	SPPL3	GTTCA	59.0909	45.9184	0	0	13.1725	35	35	197	44	cyan	1	1	1	0	3
SRFchr643180616	chr6	43180616	SRF	CCTCC	25	45.8333	0	0	-20.8333	20	20	102	21	cyan	0	0	0	0	0
ST13chr2240824900	chr22	40824900	ST13	GTTCT	13.7778	51.8519	0	0.44843	-38.0741	231	178	384	229	cyan	1	1	1	0	3
ST3GAL5chr285848102	chr2	85848102	ST3GAL5	ACTTA	33.3333	57.1429	0	7.69231	-23.8095	14	12	35	26	cyan	0	0	0	0	0
STARD7chr296186743	chr2	96186743	STARD7	GATTG	22.7941	30.8673	0	0	-8.07323	121	23	788	136	cyan	0	0	0	0	0
STIM2chr427023318	chr4	27023318	STIM2	CTTAC	19.6429	32.1429	0	0	-12.5	31	31	31	65	cyan	0	0	0	0	0
STK10chr5172043807	chr5	172043807	STK10	ACTTC	51.4286	75	4.52261	4.52261	-23.5714	269	269	51	292	cyan	0	0	0	0	0
STK16chr2219248648	chr2	219248648	STK16	ACTTC	45.8333	75	0	0	-29.1667	19	12	50	31	cyan	0	0	0	0	0
STT3Bchr331533219	chr3	31533219	STT3B	CTTCA	20	43.8596	0	0	-23.8596	12	12	426	49	cyan	0	0	0	0	0
STX16-NPEPL1chr2058678847	chr20	58678847	STX16-NPEPL1	CCTTT	25	32.6531	8.69565	7.69231	-7.65306	13	26	63	61	cyan	0	0	0	0	0
STX16chr2058678847	chr20	58678847	STX16	CCTTT	25	32.6531	8.69565	7.69231	-7.65306	13	26	63	61	cyan	0	0	0	0	0
SUPT6Hchr1728690220	chr17	28690220	SUPT6H	CCTTC	31.5789	16.6667	7.14286	7.14286	14.9123	34	34	116	40	cyan	0	0	0	0	0
SYNGR2chr1778171992	chr17	78171992	SYNGR2	CTTTC	30.7692	14.5455	0	0	16.2238	56	42	61	33	cyan	0	0	0	0	0
TAF1Dchr1193734718	chr11	93734718	TAF1D	TATTA	16.129	37	1.03093	1.03093	-20.871	100	100	212	31	cyan	0	0	0	0	0
TAF9BchrX78129969	chrX	78129969	TAF9B	GTTCT	90	90.5172	0	0	-0.517241	54	34	124	32	cyan	1	1	1	0	3
TATDN2chr310279939	chr3	10279939	TATDN2	CCTCA	38.8889	28.5714	0	0	10.3175	15	15	59	66	cyan	0	0	0	0	0
TBC1D1chr438137482	chr4	38137482	TBC1D1	ACTCC	37.5	46.5909	7.69231	2.08333	-9.09091	51	17	192	42	cyan	0	0	0	0	0
TBC1D10Bchr1630357952	chr16	30357952	TBC1D10B	CTTAC	27.2727	35.5556	0	0	-8.28283	40	40	150	45	cyan	0	0	0	0	0
TBC1D10Bchr1630357953	chr16	30357953	TBC1D10B	GCTTA	35	26.1905	2.85714	2.85714	8.80952	36	36	131	41	cyan	0	0	0	0	0
TBC1D5chr318348947	chr3	18348947	TBC1D5	GATTG	23.6842	35.9494	0.201207	0.537634	-12.2652	186	497	396	456	cyan	0	0	0	0	0
TCF3chr191615818	chr19	1615818	TCF3	GCTAG	30.4348	17.1875	5.88235	5.88235	13.2473	22	22	152	29	cyan	0	0	0	0	0
TCF7chr5134142267	chr5	134142267	TCF7	CCTCA	66.6667	40.7407	0	0	25.9259	55	73	599	579	cyan	0	0	0	0	0
TCOF1chr5150400120	chr5	150400120	TCOF1	ACTTC	41.1765	25	7.40741	7.40741	16.1765	31	31	161	26	cyan	0	0	0	0	0
THAP12chr1176352341	chr11	76352341	THAP12	CATAG	38.6364	50.7692	2.7027	0	-12.1329	21	40	216	151	cyan	0	0	0	0	0
THUMPD3chr39371473	chr3	9371473	THUMPD3	GATTT	43.4783	48.0969	0	0	-4.61862	101	36	337	77	cyan	0	0	0	0	0
TIA1chr270215492	chr2	70215492	TIA1	GTTCA	17.8808	31.7829	1.5625	0	-13.9022	95	66	407	154	cyan	1	1	1	0	3
TMEM147chr1935546548	chr19	35546548	TMEM147	CTTTC	41.6667	14.4737	6.25	8.69565	27.193	67	26	115	21	cyan	0	0	0	0	0
TMEM160chr1947045932	chr19	47045932	TMEM160	CATTA	36.6197	21.813	1.81818	0.355872	14.8067	288	110	428	101	cyan	0	0	0	0	0
TMEM218chr11125097277	chr11	125097277	TMEM218	GATTT	36	25.2101	0	0	10.7899	65	49	121	75	cyan	0	0	0	0	0
TMEM250chr9136116579	chr9	136116579	TMEM250	ACTTC	77.7778	75.5102	0	0	2.26757	11	11	95	57	cyan	0	0	0	0	0
TMUB2chr1744189142	chr17	44189142	TMUB2	GCTTG	46.6667	16.6667	0	0	30	15	20	49	62	cyan	0	0	0	0	0
TMX2-CTNND1chr1157741586	chr11	57741586	TMX2-CTNND1	GCTCT	30.137	23.7443	4.08163	0	6.39269	187	161	245	85	cyan	0	0	0	0	0
TNIP1chr5151029968	chr5	151029968	TNIP1	CATAA	37.5	42.1053	2.73973	3.0303	-4.60526	34	76	95	83	cyan	0	0	0	0	0
TOE1chr145343478	chr1	45343478	TOE1	GATTG	40.9091	45.3039	0	1.02041	-4.39478	98	33	181	44	cyan	0	0	0	0	0
TP53I13chr1729572478	chr17	29572478	TP53I13	GTTCA	96.1538	96.7213	0	2.94118	-0.567465	34	17	307	80	cyan	0	1	1	0	2
TPRA1chr3127573630	chr3	127573630	TPRA1	GTTCG	88.4058	92.4731	0	0	-4.06732	42	20	96	69	cyan	1	1	1	1	4
TRAPPC10chr2144037840	chr21	44037840	TRAPPC10	GTTCA	87.8378	82.243	0	0	5.59485	12	12	107	74	cyan	0	1	1	0	2
TRAPPC9chr8140287709	chr8	140287709	TRAPPC9	GTTCG	84.6154	95	0	0	-10.3846	39	39	104	40	cyan	0	1	1	0	2
TRMOchr997910267	chr9	97910267	TRMO	GATTT	39.4737	17.9104	0	0	21.5632	25	32	67	38	cyan	0	0	0	0	0
TRMT10Cchr3101565347	chr3	101565347	TRMT10C	CATAG	24.1379	35.6436	8.33333	1.5873	-11.5056	67	14	167	54	cyan	0	0	0	0	0
TRMT12chr8124452061	chr8	124452061	TRMT12	GATTC	42.8571	60	0	0	-17.1429	41	41	53	31	cyan	0	0	0	0	0
TSC22D4chr7100467009	chr7	100467009	TSC22D4	CCTCG	58.3333	60	0	0	-1.66667	27	27	40	55	cyan	0	0	0	0	0
TSEN54chr1775524632	chr17	75524632	TSEN54	TTTAA	32.1429	15.7895	0	0	16.3534	11	21	47	43	cyan	0	0	0	0	0
TSPAN14chr1080522552	chr10	80522552	TSPAN14	CTTGG	21.8182	33.3333	0	0	-11.5152	81	81	23	71	cyan	0	0	0	0	0
TSPYL4chr6116252454	chr6	116252454	TSPYL4	CTTGG	30.6122	18.9655	0	0	11.6467	27	52	67	52	cyan	0	0	0	0	0
TSR3chr161349374	chr16	1349374	TSR3	CATAA	27.5862	34.4828	1.40845	1.40845	-6.89655	106	106	217	84	cyan	0	0	0	0	0
UBE2E3chr2181062973	chr2	181062973	UBE2E3	ACTTC	38.4615	34.7222	4.7619	0	3.73932	77	25	175	34	cyan	0	0	0	0	0
UBE2L3chr2221622799	chr22	21622799	UBE2L3	ACTTC	23.0769	31.5789	0	1.02041	-8.50202	106	68	256	120	cyan	0	0	0	0	0
UBP1chr333389978	chr3	33389978	UBP1	ACTTA	50	71.7949	0	0	-21.7949	24	24	93	64	cyan	0	0	0	0	0
UBQLN2chrX56565266	chrX	56565266	UBQLN2	CATTA	25.4545	36.7647	3.125	0	-11.3102	18	34	72	65	cyan	0	0	0	0	0
UBXN11chr126282420	chr1	26282420	UBXN11	ATTCA	37.5	10.5263	6.25	9.52381	26.9737	28	24	37	30	cyan	0	0	0	0	0
USF2chr1935279516	chr19	35279516	USF2	TCTAG	16.9492	54.9763	8.33333	0	-38.0272	13	20	283	170	cyan	1	1	1	0	3
USP20chr9129880637	chr9	129880637	USP20	CGTTA	32.2034	25	2.32558	0	7.20339	53	45	164	121	cyan	0	0	0	0	0
USP22chr1721002652	chr17	21002652	USP22	GATTA	32.7434	27.924	0	0	4.81939	149	149	687	113	cyan	0	0	0	0	0
USP47chr1111942915	chr11	11942915	USP47	ACTTG	38.8889	27.2727	3.22581	0	11.6162	22	31	33	23	cyan	0	0	0	0	0
UTP3chr470689939	chr4	70689939	UTP3	ACTTA	18.1818	31.7073	1.5625	1.5625	-13.5255	68	68	66	26	cyan	0	0	0	0	0
UTP3chr470689940	chr4	70689940	UTP3	CTTAC	30.7692	24.4186	1.40845	1.40845	6.35063	73	73	101	40	cyan	0	0	0	0	0
VAV1chr196837023	chr19	6837023	VAV1	CCTTG	46.6667	14.0351	0	0	32.6316	30	12	326	147	cyan	0	0	0	0	0
VCPIP1chr866634683	chr8	66634683	VCPIP1	CTTTA	28.5714	31.8182	8.33333	8.33333	-3.24675	36	36	22	21	cyan	0	0	0	0	0
VSIRchr1071750775	chr10	71750775	VSIR	ACTTC	56.1069	68.1818	5.11364	0	-12.0749	23	203	34	456	cyan	0	0	0	0	0
VSIRchr1071750979	chr10	71750979	VSIR	ACTTA	57.0312	53.3333	8.69565	0	3.69792	11	127	36	305	cyan	0	0	0	0	0
WDSUB1chr2159248454	chr2	159248454	WDSUB1	GTTAA	60.6061	40.8451	1.47059	0	19.761	76	70	71	33	cyan	0	1	1	0	2
XAB2chr197623247	chr19	7623247	XAB2	CCTTC	50	41.1765	0	0	8.82353	52	52	51	24	cyan	0	0	0	0	0
XAB2chr197627406	chr19	7627406	XAB2	CCTCA	33.3333	30	0	0	3.33333	51	51	73	28	cyan	0	0	0	0	0
XPO6chr1628098511	chr16	28098511	XPO6	ACTTC	47	48.2353	4	6.66667	-1.23529	15	25	100	107	cyan	0	0	0	0	0
XPO6chr1628106191	chr16	28106191	XPO6	CCTCC	26.6667	37.5	0	0	-10.8333	22	22	33	41	cyan	0	0	0	0	0
YDJCchr2221628855	chr22	21628855	YDJC	CTTCC	35.2941	20.339	0	0	14.9551	14	14	70	27	cyan	0	0	0	0	0
YRDCchr137803945	chr1	37803945	YRDC	CCTCA	62.5	27.6923	0	0	34.8077	20	20	170	21	cyan	0	0	0	0	0
YTHDF1chr2063202504	chr20	63202504	YTHDF1	GATTT	22.093	41.1168	0	0	-19.0237	21	18	197	87	cyan	0	0	0	0	0
ZBTB1chr1464522788	chr14	64522788	ZBTB1	CTTAC	35	48.1481	0	7.14286	-13.1481	32	30	53	52	cyan	0	0	0	0	0
ZC3H18chr1688631360	chr16	88631360	ZC3H18	GATTT	20	38.2979	3.7037	0	-18.2979	53	34	131	52	cyan	0	0	0	0	0
ZER1chr9128751193	chr9	128751193	ZER1	CCTCG	70	40	0	0	30	31	31	48	50	cyan	0	0	0	0	0
ZGPATchr2063708572	chr20	63708572	ZGPAT	CCTCT	50	41.1765	5.55556	5.55556	8.82353	51	51	40	26	cyan	0	0	0	0	0
ZMYND8chr2047210327	chr20	47210327	ZMYND8	GATAC	31.25	24.4444	0	0	6.80556	30	30	48	35	cyan	0	0	0	0	0
ZNF195chr113360397	chr11	3360397	ZNF195	ACTTA	57.1429	61.6438	4	0	-4.50098	71	50	77	28	cyan	0	0	0	0	0
ZNF22chr1045003654	chr10	45003654	ZNF22	GTTCT	53.1532	34.0841	0	0.252525	19.0691	396	130	666	111	cyan	0	1	1	0	2
ZNF227chr1944236111	chr19	44236111	ZNF227	GTTCA	60.6061	11.1111	0	7.14286	49.4949	14	12	54	33	cyan	0	0	0	0	0
ZNF254chr1924126426	chr19	24126426	ZNF254	CTTAA	17.8571	51.2195	0	0	-33.3624	20	21	43	28	cyan	0	0	0	0	0
ZNF263chr163290024	chr16	3290024	ZNF263	CTTCG	38.0952	34.4828	8.33333	8.33333	3.61248	14	14	37	26	cyan	0	0	0	0	0
ZNF266chr199412826	chr19	9412826	ZNF266	GTTCG	26.2911	35.3333	0	0	-9.04225	52	113	152	213	cyan	0	0	1	0	1
ZNF317chr199161020	chr19	9161020	ZNF317	GTTCA	70.1299	53.6481	0	0	16.4818	29	12	233	77	cyan	0	1	1	0	2
ZNF496chr1247300857	chr1	247300857	ZNF496	ACTCC	22.2222	42.8571	0	0	-20.6349	23	23	62	45	cyan	0	0	0	0	0
ZNF830chr1734962804	chr17	34962804	ZNF830	GATTG	37.931	47.8873	1.96078	0	-9.95629	65	51	72	29	cyan	0	0	0	0	0

## Sheet: UniqueJurkat
Annotation	chr	position	strand	kmer	ACP	T_JurkatDRS	C_JurkatDRS	T_JurkatIVT	C_JurkatIVT	T_NaiveDRS	C_NaiveDRS	T_NaiveIVT	C_NaiveIVT	N_reads_JurkatDRS	N_reads_JurkatIVT	N_reads_NaiveDRS	N_reads_NaiveIVT	mm.JurkatDRS	mm.JurkatIVT	mm.NaiveDRS	mm.NaiveIVT	p.value.JurkatDRS	p.value.NaiveDRS	color	BID.seq	CeU.seq	PRAISE	RBS.seq
MGRN1	chr16	4690520	+	CCTCC	MGRN1chr164690520	4	4	1	0	3	0	1	0	25	16	22	16	50	0	0	0	1.85627e-05	1	black	0	0	0	0
USP10	chr16	84745415	+	ACTTG	USP10chr1684745415	74	60	113	2	35	3	27	1	176	115	42	28	44.7761	1.73913	7.89474	3.57143	5.31231e-68	0.153412	black	0	0	0	0
TTLL1	chr22	43039687	-	TTTCC	TTLL1chr2243039687	8	6	21	2	12	1	21	2	31	44	23	44	42.8571	8.69565	7.69231	8.69565	1.67736e-07	1	black	0	0	0	0
DBNL	chr7	44059577	+	CCTCC	DBNLchr744059577	83	57	20	0	77	4	10	0	164	21	84	11	40.7143	0	4.93827	0	6.98433e-55	0.242254	black	0	0	0	0
NLRC5	chr16	57055058	+	CTTCA	NLRC5chr1657055058	30	19	25	1	55	6	12	0	50	26	62	12	38.7755	3.84615	9.83607	0	8.06474e-15	9.16601e-05	black	0	0	0	0
YLPM1	chr14	74799230	+	GATTA	YLPM1chr1474799230	46	29	28	0	26	2	28	0	76	30	28	30	38.6667	0	7.14286	0	9.71893e-54	0.00488339	black	0	0	0	0
FYB1	chr5	39137731	-	TTTTT	FYB1chr539137731	5	3	5	0	16	1	163	2	22	11	31	196	37.5	0	5.88235	1.21212	1.69459e-07	0.18724	black	0	0	0	0
RPS15	chr19	1438625	+	CCTTC	RPS15chr191438625	12	7	14	1	9	0	14	1	34	33	22	33	36.8421	6.66667	0	6.66667	1.88592e-07	1	black	0	0	0	0
BCL2	chr18	63318755	-	GATTA	BCL2chr1863318755	16	9	332	3	212	19	332	3	25	335	231	335	36	0.895522	8.22511	0.895522	2.6973e-17	4.04404e-11	black	0	0	0	0
IRS1	chr2	226795190	-	GATTT	IRS1chr2226795190	34	19	49	1	23	2	49	1	53	50	25	50	35.8491	2	8	2	2.18466e-41	0.00109907	black	0	0	0	0
FBXW4	chr10	101611239	-	ACTTC	FBXW4chr10101611239	9	5	31	0	24	1	31	0	21	34	37	34	35.7143	0	4	0	1.47806e-08	0.198484	black	0	0	0	0
SAE1	chr19	47197379	+	GGTTG	SAE1chr1947197379	11	6	23	1	16	0	23	1	76	76	48	76	35.2941	4.16667	0	4.16667	3.14173e-12	1	black	0	0	0	0
PRMT6	chr1	107057436	+	GATTG	PRMT6chr1107057436	41	22	31	0	21	2	13	0	65	31	23	13	34.9206	0	8.69565	0	4.94235e-44	0.00163673	black	0	0	0	0
GIT1	chr17	29574655	-	CATAG	GIT1chr1729574655	19	10	10	1	17	0	10	1	46	17	23	17	34.4828	9.09091	0	9.09091	1.15755e-13	1	black	0	0	0	0
WDR3	chr1	117959497	+	ACTCC	WDR3chr1117959497	37	19	49	0	8	0	16	0	294	53	40	17	33.9286	0	0	0	6.17965e-25	1	black	0	0	0	0
MECP2	chrX	154030446	-	CATTG	MECP2chrX154030446	28	14	19	0	24	2	16	0	43	21	32	16	33.3333	0	7.69231	0	1.28835e-18	0.0475711	black	0	0	0	0
PEX6	chr6	42968881	-	CTTAC	PEX6chr642968881	16	8	9	0	17	1	9	0	34	13	31	13	33.3333	0	5.55556	0	7.33392e-11	0.190534	black	0	0	0	0
RPS6KA3	chrX	20150083	-	CTTAA	RPS6KA3chrX20150083	12	6	10	1	37	4	10	1	21	14	43	14	33.3333	9.09091	9.7561	9.09091	1.25137e-10	1	black	0	0	0	0
RBCK1	chr20	430814	+	GTTGG	RBCK1chr20430814	13	6	66	1	20	0	66	1	31	76	25	76	31.5789	1.49254	0	1.49254	2.24921e-13	1	black	0	0	0	0
INTS9	chr8	28767958	-	ACTTT	INTS9chr828767958	46	21	31	0	19	1	12	0	73	33	22	14	31.3433	0	5	0	3.10675e-31	0.126784	black	0	0	0	0
HGH1	chr8	144140223	+	CCTTG	HGH1chr8144140223	11	5	6	0	9	0	6	0	103	30	33	30	31.25	0	0	0	1.73934e-06	1	black	0	0	0	0
OXSR1	chr3	38253616	+	GATTG	OXSR1chr338253616	94	42	76	0	36	2	76	0	136	76	38	76	30.8824	0	5.26316	0	5.83969e-80	0.00443224	black	0	0	0	0
TATDN2	chr3	10280018	+	TCTTG	TATDN2chr310280018	23	10	11	1	17	1	11	1	140	26	111	26	30.303	8.33333	5.55556	8.33333	1.48065e-13	0.181683	black	0	0	0	0
ADPGK	chr15	72751794	-	TATGA	ADPGKchr1572751794	152	66	66	3	135	4	49	4	225	70	140	53	30.2752	4.34783	2.8777	7.54717	1.15064e-36	1	black	0	0	0	0

## Sheet: UniqueNaive
Annotation	chr	position	strand	kmer	ACP	T_JurkatDRS	C_JurkatDRS	T_JurkatIVT	C_JurkatIVT	T_NaiveDRS	C_NaiveDRS	T_NaiveIVT	C_NaiveIVT	N_reads_JurkatDRS	N_reads_JurkatIVT	N_reads_NaiveDRS	N_reads_NaiveIVT	mm.JurkatDRS	mm.JurkatIVT	mm.NaiveDRS	mm.NaiveIVT	p.value.JurkatDRS	p.value.NaiveDRS	color	BID.seq	CeU.seq	PRAISE	RBS.seq
SPPL3	chr12	120764171	-	CCTTC	SPPL3chr12120764171	47	5	9	0	9	5	9	0	79	13	24	13	9.61538	0	35.7143	0	0.00837056	4.28147e-05	black	0	0	0	0
SRF	chr6	43179454	+	CCTCG	SRFchr643179454	29	3	5	0	5	3	5	0	146	19	30	19	9.375	0	37.5	0	0.0338291	0.0016904	black	0	0	0	0
LRRC61	chr7	150337081	+	CCTTG	LRRC61chr7150337081	39	4	32	3	4	2	32	3	174	138	35	138	9.30233	8.57143	33.3333	8.57143	0.00270501	1	black	0	0	0	0
AKNA	chr9	114346705	-	CTTCC	AKNAchr9114346705	10	1	12	0	16	8	12	0	24	19	38	19	9.09091	0	33.3333	0	0.181361	5.1909e-08	black	0	0	0	0
MEPCE	chr7	100431122	+	ACTTC	MEPCEchr7100431122	30	3	49	1	11	7	49	1	72	53	31	53	9.09091	2	38.8889	2	0.00102594	0.00430377	black	0	0	0	0
ZFAND3	chr6	38154011	+	TCTTC	ZFAND3chr638154011	20	2	22	2	12	6	22	2	29	30	25	30	9.09091	8.33333	33.3333	8.33333	0.0450185	5.6884e-07	black	0	0	0	0
WDR77	chr1	111441264	-	TCTCC	WDR77chr1111441264	221	21	54	5	16	9	15	1	300	83	34	19	8.67769	8.47458	36	6.25	0.487957	1.18261e-05	black	0	0	0	0
BOLA1	chr1	149900685	+	CCTGG	BOLA1chr1149900685	32	3	118	1	3	2	58	0	236	123	41	59	8.57143	0.840336	40	0	0.00317679	1	black	0	0	0	0
PSMD3	chr17	39986639	+	CCTCC	PSMD3chr1739986639	64	6	46	5	5	4	46	5	137	197	43	197	8.57143	9.80392	44.4444	9.80392	1	0.000102047	black	0	0	0	0
SLC25A25	chr9	128107514	+	CATTC	SLC25A25chr9128107514	65	6	33	3	13	6	33	3	74	40	21	40	8.4507	8.33333	31.5789	8.33333	3.57979e-06	2.00616e-09	black	0	0	0	0
IFT27	chr22	36758327	-	TTTCC	IFT27chr2236758327	55	5	26	2	5	3	7	0	161	62	21	18	8.33333	7.14286	37.5	0	0.428802	0.000763155	black	0	0	0	0
NAT9	chr17	74771567	-	CCTCC	NAT9chr1774771567	22	2	15	1	9	4	3	0	45	28	26	12	8.33333	6.25	30.7692	0	0.447561	0.000524187	black	0	0	0	0
NCSTN	chr1	160349088	+	CTTAC	NCSTNchr1160349088	11	1	10	0	5	7	10	0	38	29	30	29	8.33333	0	58.3333	0	0.115544	2.2241e-11	black	0	0	0	0
PDCD11	chr10	103443281	+	TCTCA	PDCD11chr10103443281	33	3	69	3	10	7	69	3	52	98	21	98	8.33333	4.16667	41.1765	4.16667	0.433866	1.88412e-08	black	0	0	0	0
GLYR1	chr16	4805243	-	CATAC	GLYR1chr164805243	34	3	20	2	11	6	20	2	107	64	47	64	8.10811	9.09091	35.2941	9.09091	1	2.00863e-10	black	0	0	0	0
CMTM6	chr3	32491789	-	CTTTC	CMTM6chr332491789	58	5	29	2	9	4	8	0	171	56	33	23	7.93651	6.45161	30.7692	0	0.384121	6.97456e-06	black	0	0	0	0
YWHAG	chr7	76327609	-	TTTCC	YWHAGchr776327609	273	19	38	3	11	6	38	3	847	119	21	119	6.50685	7.31707	35.2941	7.31707	9.17163e-06	2.19024e-06	black	0	0	0	0
BCL2L1	chr20	31665510	-	TTTCC	BCL2L1chr2031665510	172	10	103	6	12	6	103	6	412	262	41	262	5.49451	5.50459	33.3333	5.50459	0.0517746	3.21633e-06	black	0	0	0	0
CAMKK2	chr12	121237840	-	TTTCC	CAMKK2chr12121237840	52	3	19	1	8	4	19	1	107	41	25	41	5.45455	5	33.3333	5	1	0.000155624	black	0	0	0	0
YBEY	chr21	46291348	+	GGTGA	YBEYchr2146291348	132	7	54	0	89	42	88	0	140	54	135	88	5.03597	0	32.0611	0	1.39685e-06	4.42509e-62	black	0	0	0	0
CCDC88C	chr14	91272873	-	GCTCA	CCDC88Cchr1491272873	19	1	3	0	15	7	3	0	35	11	46	11	5	0	31.8182	0	0.123439	9.59496e-10	black	0	0	0	0
WASF2	chr1	27406310	-	TCTTT	WASF2chr127406310	22	1	5	0	7	4	5	0	79	17	55	36	4.34783	0	36.3636	0	0.134062	1.09372e-06	black	0	0	0	0
STX10	chr19	13144241	-	CTTCA	STX10chr1913144241	48	2	22	2	9	4	8	0	84	44	25	16	4	8.33333	30.7692	0	1	1.33289e-05	black	0	0	0	0
IMPDH1	chr7	128392672	-	CTTCT	IMPDH1chr7128392672	56	2	39	4	9	5	39	4	97	83	35	83	3.44828	9.30233	35.7143	9.30233	1	1.89902e-07	black	0	0	0	0
SNAP29	chr22	20889402	+	GTTAG	SNAP29chr2220889402	100	1	13	0	3	22	15	0	101	13	26	15	0.990099	0	88	0	0.248125	1.33793e-52	black	0	0	0	0
SZRD1	chr1	16396654	+	TTTCG	SZRD1chr116396654	271	1	120	0	79	50	120	0	274	121	130	121	0.367647	0	38.7597	0	1	6.38888e-79	black	0	0	0	0
CCSER2	chr10	84513955	+	ACTCC	CCSER2chr1084513955	1	0	39	0	9	5	39	0	41	42	41	42	0	0	35.7143	0	1	4.73677e-07	black	0	0	0	0
MAP3K3	chr17	63694974	+	CATAT	MAP3K3chr1763694974	16	0	12	0	6	4	12	0	34	37	40	37	0	0	40	0	1	1.37962e-06	black	0	0	0	0
PRKAR1B	chr7	680675	-	ACTCC	PRKAR1Bchr7680675	25	0	35	3	11	5	35	3	30	46	23	46	0	7.89474	31.25	7.89474	1	1.0128e-06	black	0	0	0	0
RBM39	chr20	35739047	-	CCTCA	RBM39chr2035739047	24	0	91	1	11	5	91	1	27	111	24	111	0	1.08696	31.25	1.08696	1	0.000215973	black	0	0	0	0
TMEM218	chr11	125097138	-	ACTCA	TMEM218chr11125097138	36	0	13	1	8	4	9	0	44	19	25	11	0	7.14286	33.3333	0	1	2.56338e-06	black	0	0	0	0
