# Supplementary material
Source: HighWire-hosted journal article supplement (doi:10.1101/rna.080633.125)
Supplement: Supplemental_Table_S2.xlsx [file Supplemental_Table_S2.xlsx]

## Sheet: Common_GO
Term	Rank	P.value	Adjusted.P.value	Old.P.value	Old.Adjusted.P.value	Odds.Ratio	Combined.Score	Genes
Regulation Of Sprouting Angiogenesis (GO:1903670)	1	0.000562072	0.594582	0	0	14.0787	105.363	PIK3CB;ITGA5;KLF2;JAK1
Regulation Of Transcription Elongation By RNA Polymerase II (GO:0034243)	2	0.000726152	0.594582	0	0	4.12324	29.8018	MED1;INTS1;ZMYND8;RNF8;NELFB;NELFA;MED16;CDK13;SUPT6H
rRNA Pseudouridine Synthesis (GO:0031118)	3	0.00130054	0.594582	0	0	21.0672	139.991	TNIP1;DKC1;TSR3
MAPK Cascade (GO:0000165)	4	0.00140621	0.594582	0	0	4.12273	27.0733	MAP2K3;MAP3K3;MAPKAPK2;MINK1;KRAS;PTPN7;MAP3K11;MAPK3
Regulation Of Interleukin-17 Production (GO:0032660)	5	0.00294678	0.594582	0	0	8.04013	46.8502	PRNP;PRKCQ;LY9;VSIR
Negative Regulation Of Intracellular Signal Transduction (GO:1902532)	6	0.00318445	0.594582	0	0	2.68938	15.4625	MAP2K3;PPM1A;USP20;TNIP1;PDE3B;BCL2;MUL1;RIPK1;CCDC22;PIK3CB;ARHGAP25;RELA
Response To Interleukin-6 (GO:0070741)	7	0.00350802	0.594582	0	0	56.0391	316.772	SELPLG;RELA
Negative Regulation Of I-kappaB kinase/NF-kappaB Signaling (GO:0043124)	8	0.00392257	0.594582	0	0	5.42037	30.0343	PPM1A;USP20;TNIP1;RIPK1;CCDC22
Protein Autophosphorylation (GO:0046777)	9	0.00446069	0.594582	0	0	2.86667	15.5157	STK10;MAP3K3;STK16;MAPKAPK2;CAD;MINK1;MKNK2;RIPK1;MAP3K11;MAPK3
Regulation Of Organelle Assembly (GO:1902115)	10	0.00539697	0.594582	0	0	3.59717	18.7841	TBC1D1;MTMR3;RABGAP1;TBC1D5;CEP295;TBC1D10B;UBQLN2
Regulation Of Muscle Cell Differentiation (GO:0051147)	11	0.00552864	0.594582	0	0	10.5294	54.7299	RBM4;SRF;SUPT6H
Stress-Activated MAPK Cascade (GO:0051403)	12	0.00590201	0.594582	0	0	4.85818	24.9344	MAP2K3;MINK1;MAP3K11;CRKL;MAPK3
Negative Regulation Of Interleukin-17 Production (GO:0032700)	13	0.00685537	0.594582	0	0	28.0168	139.6	PRNP;VSIR
Protein Modification Process (GO:0036211)	14	0.00703757	0.594582	0	0	1.73127	8.58102	MTMR3;ARAF;JADE2;UBE2L3;STK10;AKT2;GRK6;MKNK2;ST3GAL5;JAK1;MAPK3;PARP4;MINK1;PMM2;BCKDK;CTDNEP1;FAM220A;PPM1A;ILF3;ATG16L2;SDHAF2;CTDSP2;MAPKAPK2;PRKCQ;PTPN7;STT3B;CSNK1G2;MAP3K11
Cellular Response To Interleukin-6 (GO:0071354)	15	0.00718417	0.594582	0	0	9.35854	46.1926	SELPLG;RELA;JAK1
Regulation Of Telomerase Activity (GO:0051972)	16	0.00849671	0.594582	0	0	4.40141	20.9863	PARP4;TNIP1;DKC1;PRKCQ;MAPK3
Negative Regulation Of Transcription Elongation By RNA Polymerase II (GO:0034244)	17	0.00910248	0.594582	0	0	8.42185	39.576	RNF8;NELFB;NELFA
Regulation Of Cytokine Production Involved In Inflammatory Response (GO:1900015)	18	0.0100668	0.594582	0	0	5.35634	24.6312	CARD9;ADCY7;EXTL3;PLD3
Retrograde Transport, Endosome To Golgi (GO:0042147)	19	0.0104052	0.594582	0	0	3.13787	14.3258	ARFRP1;TBC1D5;STX16;TRAPPC10;SGSM2;BET1L;TBC1D10B
Positive Regulation Of Transcription Elongation By RNA Polymerase II (GO:0032968)	20	0.0106098	0.594582	0	0	4.14167	18.828	MED1;ZMYND8;MED16;CDK13;SUPT6H
T-helper 17 Cell Lineage Commitment (GO:0072540)	21	0.0111647	0.594582	0	0	18.676	83.9485	LY9;JAK1
Regulation Of Transmembrane Transporter Activity (GO:0022898)	22	0.0111647	0.594582	0	0	18.676	83.9485	BCL2;RIPK1
Negative Regulation Of Sprouting Angiogenesis (GO:1903671)	23	0.0111647	0.594582	0	0	18.676	83.9485	PIK3CB;KLF2
Nucleobase-Containing Small Molecule Interconversion (GO:0015949)	24	0.0111647	0.594582	0	0	18.676	83.9485	AK2;CMPK1
Positive Regulation Of Sprouting Angiogenesis (GO:1903672)	25	0.0111647	0.594582	0	0	18.676	83.9485	ITGA5;JAK1
Positive Regulation Of Telomerase Activity (GO:0051973)	26	0.011579	0.594582	0	0	5.11236	22.7938	TNIP1;DKC1;PRKCQ;MAPK3
Positive Regulation Of Protein Modification Process (GO:0031401)	27	0.0126935	0.594582	0	0	2.42125	10.5728	ANKLE2;AKT2;CEP295;ERP29;RIPK1;KRAS;SPPL3;CRKL;MOB3A;MAPK3
Vesicle Budding From Membrane (GO:0006900)	28	0.0132298	0.594582	0	0	4.88959	21.1489	GOLPH3;TRAPPC10;TRAPPC9;CHMP7
Regulation Of Cell Growth (GO:0001558)	29	0.0144305	0.594582	0	0	2.25975	9.57775	RPTOR;DNAJB2;USP47;CDKN1B;NME6;BCL2;MUL1;PRKCQ;JADE2;TAF9B;RTN4
Endocytic Recycling (GO:0032456)	30	0.0158582	0.594582	0	0	3.70423	15.3506	STX16;RAB35;CMTM6;CCDC22;ARF6
Regulation Of Homotypic Cell-Cell Adhesion (GO:0034110)	31	0.0163657	0.594582	0	0	14.0056	57.5989	PRKCQ;JAK1
T-helper 17 Cell Differentiation (GO:0072539)	32	0.0163657	0.594582	0	0	14.0056	57.5989	LY9;JAK1
Positive Regulation Of Adaptive Immune Response Based On Somatic Recombination Of Immune Receptors Built From Immunoglobulin Superfamily Domains (GO:0002824)	33	0.0163657	0.594582	0	0	14.0056	57.5989	ZBTB1;PRKCQ
Pyrimidine Ribonucleotide Biosynthetic Process (GO:0009220)	34	0.0163657	0.594582	0	0	14.0056	57.5989	CAD;CMPK1
Visual System Development (GO:0150063)	35	0.0165053	0.594582	0	0	6.47641	26.5796	SCO2;POLR2D;SMG9
Membrane Protein Ectodomain Proteolysis (GO:0006509)	36	0.0165053	0.594582	0	0	6.47641	26.5796	SPPL2B;PRKCQ;SPPL3
poly(A)+ mRNA Export From Nucleus (GO:0016973)	37	0.0165053	0.594582	0	0	6.47641	26.5796	DDX19A;MCM3AP;POLDIP3
Vesicle-Mediated Transport To The Plasma Membrane (GO:0098876)	38	0.0172059	0.594582	0	0	3.13183	12.7231	STX16;SEC16A;RAB35;CMTM6;CCDC22;ARF6
Glycoprotein Biosynthetic Process (GO:0009101)	39	0.0173984	0.594582	0	0	3.60888	14.621	GOLPH3;B4GAT1;TNIP1;PMM2;ST3GAL5
Positive Regulation Of JNK Cascade (GO:0046330)	40	0.0173984	0.594582	0	0	3.60888	14.621	MFHAS1;MINK1;CARD9;RIPK1;MAP3K11
Negative Regulation Of DNA-templated Transcription, Elongation (GO:0032785)	41	0.0195374	0.594582	0	0	6.01321	23.6645	RNF8;NELFB;NELFA
T-helper Cell Lineage Commitment (GO:0002295)	42	0.0223918	0.594582	0	0	11.2034	42.5622	LY9;JAK1
Regulation Of Mononuclear Cell Migration (GO:0071675)	43	0.0223918	0.594582	0	0	11.2034	42.5622	STK10;MAPK3
Positive Regulation Of Fatty Acid Oxidation (GO:0046321)	44	0.0223918	0.594582	0	0	11.2034	42.5622	AKT2;MLYCD
Cellular Response To Vascular Endothelial Growth Factor Stimulus (GO:0035924)	45	0.0228556	0.594582	0	0	5.61176	21.2044	MAP2K3;MAPKAPK2;RELA
Regulation Of T Cell Differentiation (GO:0045580)	46	0.023689	0.594582	0	0	4.01445	15.025	SMARCC1;TCF7;ZBTB1;ARID1B
Glycoprotein Metabolic Process (GO:0009100)	47	0.0262422	0.594582	0	0	3.87563	14.1088	GOLPH3;B4GAT1;TNIP1;STT3B
Response To Peptide (GO:1901652)	48	0.02646	0.594582	0	0	5.2605	19.1068	PRNP;ERBIN;EIF2B1
Regulation Of Plasma Membrane Bounded Cell Projection Assembly (GO:0120032)	49	0.0287222	0.594582	0	0	3.12582	11.0969	TBC1D1;RABGAP1;TBC1D5;TBC1D10B;ARF6
Positive Regulation Of DNA-templated Transcription, Elongation (GO:0032786)	50	0.0287222	0.594582	0	0	3.12582	11.0969	MED1;ZMYND8;MED16;CDK13;SUPT6H
Regulation Of Protein Dephosphorylation (GO:0035304)	51	0.0289543	0.594582	0	0	3.74607	13.2687	MFHAS1;ANKLE2;PPP1R8;SPPL3
Endoplasmic Reticulum Membrane Organization (GO:0090158)	52	0.0291798	0.594582	0	0	9.3352	32.9932	VCPIP1;RTN4
Somatic Recombination Of Immunoglobulin Genes Involved In Immune Response (GO:0002204)	53	0.0291798	0.594582	0	0	9.3352	32.9932	EXOSC6;RNF8
Glutamine Metabolic Process (GO:0006541)	54	0.0291798	0.594582	0	0	9.3352	32.9932	GLUD1;CAD
Negative Regulation Of Intrinsic Apoptotic Signaling Pathway In Response To DNA Damage By P53 Class Mediator (GO:1902166)	55	0.0291798	0.594582	0	0	9.3352	32.9932	BCL2;TAF9B
Regulation Of T-helper 17 Type Immune Response (GO:2000316)	56	0.0291798	0.594582	0	0	9.3352	32.9932	CARD9;PRKCQ
Carbohydrate Derivative Biosynthetic Process (GO:1901137)	57	0.0303499	0.594582	0	0	4.95057	17.3021	GOLPH3;B4GAT1;TNIP1
snRNA 3'-End Processing (GO:0034472)	58	0.0303499	0.594582	0	0	4.95057	17.3021	TOE1;EXOSC6;INTS1
Translesion Synthesis (GO:0019985)	59	0.0303499	0.594582	0	0	4.95057	17.3021	PARP10;REV1;ZBTB1
Glutamine Family Amino Acid Metabolic Process (GO:0009064)	60	0.0303499	0.594582	0	0	4.95057	17.3021	GLUD1;FPGS;CAD
mRNA Splice Site Recognition (GO:0006376)	61	0.0303499	0.594582	0	0	4.95057	17.3021	SF3A2;PUF60;PSIP1
Regulation Of Amyloid-Beta Formation (GO:1902003)	62	0.0303499	0.594582	0	0	4.95057	17.3021	PRNP;RELA;RTN4
Cellular Response To Peptide Hormone Stimulus (GO:0071375)	63	0.0309731	0.594582	0	0	3.05756	10.6239	INSIG2;AKT2;PDE3B;RELA;PCK2
tRNA Methylation (GO:0030488)	64	0.0318265	0.594582	0	0	3.62486	12.4966	TRMT10C;TRMO;TRMT12;THUMPD3
Protein Dephosphorylation (GO:0006470)	65	0.0326536	0.594582	0	0	2.43616	8.33604	CTDNEP1;FAM220A;PPM1A;MTMR3;SDHAF2;CTDSP2;PTPN7
JNK Cascade (GO:0007254)	66	0.0345232	0.594582	0	0	4.67507	15.7369	MINK1;MAP3K11;CRKL
Stress Granule Assembly (GO:0034063)	67	0.0345232	0.594582	0	0	4.67507	15.7369	ATXN2L;TIA1;YTHDF1
Regulation Of Morphogenesis Of A Branching Structure (GO:0060688)	68	0.0346418	0.594582	0	0	Inf	Inf	RTN4
Response To Peptidoglycan (GO:0032494)	69	0.0346418	0.594582	0	0	Inf	Inf	RELA
Negative Regulation Of Amino Acid Transport (GO:0051956)	70	0.0346418	0.594582	0	0	Inf	Inf	SLC43A1
Regulation Of Axon Guidance (GO:1902667)	71	0.0346418	0.594582	0	0	Inf	Inf	YTHDF1
Histone H4 Acetylation (GO:0043967)	72	0.0348601	0.594582	0	0	3.51124	11.7852	MORF4L2;MSL2;JADE2;MSL1
Positive Regulation Of Protein Phosphorylation (GO:0001934)	73	0.0361592	0.594582	0	0	1.87674	6.23044	MAP2K3;RPTOR;PRNP;AKT2;ARAF;ERP29;KRAS;RIPK1;ITGA5;CRKL;MAPK3;MOB3A
3'-UTR-mediated mRNA Stabilization (GO:0070935)	74	0.0366702	0.594582	0	0	8.0008	26.449	MAPKAPK2;ELAVL1
B Cell Activation Involved In Immune Response (GO:0002312)	75	0.0366702	0.594582	0	0	8.0008	26.449	EXOSC6;RNF8
Regulation Of Intrinsic Apoptotic Signaling Pathway In Response To DNA Damage By P53 Class Mediator (GO:1902165)	76	0.0366702	0.594582	0	0	8.0008	26.449	BCL2;TAF9B
Response To Muramyl Dipeptide (GO:0032495)	77	0.0366702	0.594582	0	0	8.0008	26.449	ERBIN;NOD1
Intracellular Copper Ion Homeostasis (GO:0006878)	78	0.0366702	0.594582	0	0	8.0008	26.449	PRNP;CCDC22
Isotype Switching (GO:0045190)	79	0.0366702	0.594582	0	0	8.0008	26.449	EXOSC6;RNF8
Leukocyte Tethering Or Rolling (GO:0050901)	80	0.0366702	0.594582	0	0	8.0008	26.449	GOLPH3;SELPLG
Negative Regulation Of Amyloid-Beta Formation (GO:1902430)	81	0.0366702	0.594582	0	0	8.0008	26.449	PRNP;RTN4
Response To Insulin (GO:0032868)	82	0.0383764	0.594582	0	0	2.8695	9.35547	INSIG2;AKT2;PDE3B;SLC2A1;PCK2
Sensory Organ Development (GO:0007423)	83	0.038977	0.594582	0	0	4.42857	14.3698	SCO2;POLR2D;SMG9
Eye Development (GO:0001654)	84	0.038977	0.594582	0	0	4.42857	14.3698	SCO2;POLR2D;SMG9
Phospholipid Biosynthetic Process (GO:0008654)	85	0.038977	0.594582	0	0	4.42857	14.3698	IDI1;FDPS;AGPAT3
RNA Metabolic Process (GO:0016070)	86	0.0401503	0.594582	0	0	2.32058	7.46095	ATXN2L;RBM4;EXOSC6;DKC1;PCBP2;PPP1R8;ZNF830
Positive Regulation Of Protein Secretion (GO:0050714)	87	0.0414136	0.594582	0	0	3.30403	10.5205	GLUD1;GOLPH3;POLR2D;ARF6
Endosomal Transport (GO:0016197)	88	0.0430909	0.594582	0	0	2.03221	6.39015	ARFRP1;TBC1D5;STX16;RAB35;CMTM6;CCDC22;BET1L;TBC1D10B;ARF6
Regulation Of Glucose Metabolic Process (GO:0010906)	89	0.0437075	0.594582	0	0	4.20672	13.168	BCKDK;AKT2;MLYCD
RNA Stabilization (GO:0043489)	90	0.0437075	0.594582	0	0	4.20672	13.168	TNIP1;DKC1;ELAVL1
Memory (GO:0007613)	91	0.0437075	0.594582	0	0	4.20672	13.168	PRNP;YTHDF1;EIF4EBP2
Platelet Aggregation (GO:0070527)	92	0.0437075	0.594582	0	0	4.20672	13.168	ACTN1;GNAS;PIK3CB
Positive Regulation Of Lipid Biosynthetic Process (GO:0046889)	93	0.0437075	0.594582	0	0	4.20672	13.168	RPTOR;CTDNEP1;MID1IP1
Regulation Of Clathrin-Dependent Endocytosis (GO:2000369)	94	0.0448062	0.594582	0	0	7	21.7379	PIK3CB;UBQLN2
Regulation Of Dendritic Spine Development (GO:0060998)	95	0.0448062	0.594582	0	0	7	21.7379	C21ORF91;ARF6
Regulation Of Isotype Switching (GO:0045191)	96	0.0448062	0.594582	0	0	7	21.7379	KMT5B;SUPT6H
Cellular Response To Glucocorticoid Stimulus (GO:0071385)	97	0.0448062	0.594582	0	0	7	21.7379	UBE2L3;PCK2
Cellular Response To Interleukin-4 (GO:0071353)	98	0.0448062	0.594582	0	0	7	21.7379	TCF7;JAK1
Sensory Perception (GO:0007600)	99	0.0448062	0.594582	0	0	7	21.7379	GNAS;RETREG1
Histone H4-K16 Acetylation (GO:0043984)	100	0.0448062	0.594582	0	0	7	21.7379	MSL2;MSL1
Leukocyte Adhesion To Vascular Endothelial Cell (GO:0061756)	101	0.0448062	0.594582	0	0	7	21.7379	GOLPH3;SELPLG
Negative Regulation Of Dephosphorylation (GO:0035305)	102	0.0448062	0.594582	0	0	7	21.7379	MFHAS1;PPP1R8
Positive Regulation Of Fatty Acid Metabolic Process (GO:0045923)	103	0.0448062	0.594582	0	0	7	21.7379	MID1IP1;MLYCD
Inflammatory Response (GO:0006954)	104	0.0451821	0.594582	0	0	2.44731	7.57945	MFHAS1;PARP4;MAPKAPK2;NOD1;RELA;NFKB2
Chromatin Organization (GO:0006325)	105	0.0454389	0.594582	0	0	1.80558	5.58173	PARP10;SMARCC1;CHTOP;HIRIP3;MTA1;SATB1;GRWD1;CHD8;ZBTB1;EHMT1;PSIP1;ARID1B
Dephosphorylation (GO:0016311)	106	0.0464552	0.594582	0	0	2.24079	6.87759	CTDNEP1;FAM220A;PPM1A;MTMR3;SDHAF2;CTDSP2;PTPN7
Homotypic Cell-Cell Adhesion (GO:0034109)	107	0.0487102	0.594582	0	0	4.006	12.1056	ACTN1;GNAS;PIK3CB
Positive Regulation Of Nucleic Acid-Templated Transcription (GO:1903508)	108	0.0491482	0.594582	0	0	1.56448	4.71364	MAP2K3;ZNF496;MED1;SMARCC1;CHD8;USP22;MSL2;MED16;ARID1B;KLF2;RELA;HINFP;MSL1;PPM1A;ILF3;MTA1;MORF4L2;QRICH1;TCF3
Positive Regulation Of Gene Expression (GO:0010628)	109	0.0511517	0.594582	0	0	1.68685	5.01495	MED1;YTHDF1;BTN3A1;POLDIP3;CARD9;PIK3CB;ARID1B;ELAVL1;RELA;VSIR;HINFP;ERP29;KRAS;RIPK1
Golgi To Plasma Membrane Transport (GO:0006893)	110	0.0524611	0.594582	0	0	3.03523	8.94689	ARFRP1;GOLPH3;SEC16A;CCDC22
Positive Regulation Of T Cell Differentiation (GO:0045582)	111	0.0524611	0.594582	0	0	3.03523	8.94689	SMARCC1;ZBTB1;ARID1B;VSIR
Activation Of GTPase Activity (GO:0090630)	112	0.0529327	0.594582	0	0	2.6025	7.64807	TBC1D1;TBC1D5;SGSM2;ARHGAP25;TBC1D10B
Positive Regulation Of Stress-Activated MAPK Cascade (GO:0032874)	113	0.0529327	0.594582	0	0	2.6025	7.64807	MFHAS1;MINK1;CARD9;RIPK1;MAP3K11
Regulation Of Dosage Compensation By Inactivation Of X Chromosome (GO:1900095)	114	0.0535346	0.594582	0	0	6.2216	18.2133	MSL2;MSL1
Transcription By RNA Polymerase I (GO:0006360)	115	0.0535346	0.594582	0	0	6.2216	18.2133	TCOF1;POLR1C
Negative Regulation Of Amyloid Precursor Protein Catabolic Process (GO:1902992)	116	0.0535346	0.594582	0	0	6.2216	18.2133	PRNP;RTN4
Negative Regulation Of Cytokine Production Involved In Inflammatory Response (GO:1900016)	117	0.0535346	0.594582	0	0	6.2216	18.2133	ADCY7;EXTL3
Negative Regulation Of Defense Response To Virus (GO:0050687)	118	0.0535346	0.594582	0	0	6.2216	18.2133	PCBP2;MUL1
Negative Regulation Of Intrinsic Apoptotic Signaling Pathway By P53 Class Mediator (GO:1902254)	119	0.0535346	0.594582	0	0	6.2216	18.2133	BCL2;TAF9B
Negative Regulation Of Type II Interferon Production (GO:0032689)	120	0.0535346	0.594582	0	0	6.2216	18.2133	PRNP;VSIR
NIK/NF-kappaB Signaling (GO:0038061)	121	0.0539798	0.594582	0	0	3.82353	11.1614	AMFR;RELA;NFKB2
Substantia Nigra Development (GO:0021762)	122	0.0539798	0.594582	0	0	3.82353	11.1614	GLUD1;CNP;SEC16A
Membrane Protein Proteolysis (GO:0033619)	123	0.0539798	0.594582	0	0	3.82353	11.1614	SPPL2B;PRKCQ;SPPL3
Positive Regulation Of Interleukin-8 Production (GO:0032757)	124	0.0539798	0.594582	0	0	3.82353	11.1614	NOD1;RIPK1;RELA
Regulation Of Cell Communication (GO:0010646)	125	0.0539798	0.594582	0	0	3.82353	11.1614	NCOA5;GRK6;CDK13
Ubiquitin-Dependent ERAD Pathway (GO:0030433)	126	0.0561806	0.594582	0	0	2.55493	7.35611	DNAJB2;RHBDD2;STT3B;UBQLN2;TMUB2
Protein K63-linked Ubiquitination (GO:0070534)	127	0.0564663	0.594582	0	0	2.95506	8.49316	RNF167;HECTD1;UBE2E3;RNF8
Chromatin Remodeling (GO:0006338)	128	0.0568599	0.594582	0	0	1.78569	5.11988	SMARCC1;CHTOP;MCM3AP;MTA1;SATB1;CHD8;ZBTB1;RNF8;PSIP1;SUPT6H;ARID1B
Response To Cytokine (GO:0034097)	129	0.0585681	0.594582	0	0	2.28081	6.47194	SRF;MAPKAPK2;BCL2;RIPK1;RELA;NFKB2
Regulation Of Gene Expression (GO:0010468)	130	0.0603309	0.594582	0	0	1.39202	3.90866	ZNF195;TCF7;RNF8;ZBTB1;ZNF22;JADE2;PIK3CB;RELA;VSIR;CRKL;UBE2L3;MTA1;PCBP2;RIPK1;ESRRA;MED1;ZNF263;BTN3A1;USP22;MSL2;HINFP;MSL1;NFKB2;PARP10;ERP29;KRAS;PRKCQ;TCF3;SLC2A4RG;MCM2
Regulation Of Lipid Biosynthetic Process (GO:0046890)	131	0.0628047	0.594582	0	0	5.59888	15.4962	RPTOR;MID1IP1
Carboxylic Acid Catabolic Process (GO:0046395)	132	0.0628047	0.594582	0	0	5.59888	15.4962	BCKDK;GNPDA2
Copper Ion Homeostasis (GO:0055070)	133	0.0628047	0.594582	0	0	5.59888	15.4962	PRNP;CCDC22
Ruffle Organization (GO:0031529)	134	0.0628047	0.594582	0	0	5.59888	15.4962	LIMA1;ARF6
tRNA 5'-End Processing (GO:0099116)	135	0.0628047	0.594582	0	0	5.59888	15.4962	TRMT10C;RPP25
Myoblast Differentiation (GO:0045445)	136	0.0628047	0.594582	0	0	5.59888	15.4962	SRF;HINFP
Negative Regulation Of Cyclin-Dependent Protein Kinase Activity (GO:1904030)	137	0.0628047	0.594582	0	0	5.59888	15.4962	CDKN1B;IPO7
Negative Regulation Of Cyclin-Dependent Protein Serine/Threonine Kinase Activity (GO:0045736)	138	0.0628047	0.594582	0	0	5.59888	15.4962	CDKN1B;IPO7
Negative Regulation Of Developmental Growth (GO:0048640)	139	0.0628047	0.594582	0	0	5.59888	15.4962	CDKN1B;RTN4
Negative Regulation Of miRNA Metabolic Process (GO:2000629)	140	0.0628047	0.594582	0	0	5.59888	15.4962	SRF;RELA
Negative Regulation Of miRNA Transcription (GO:1902894)	141	0.0628047	0.594582	0	0	5.59888	15.4962	SRF;RELA
Positive Regulation Of Monooxygenase Activity (GO:0032770)	142	0.0628047	0.594582	0	0	5.59888	15.4962	POR;PIK3CB
Regulation Of Rac Protein Signal Transduction (GO:0035020)	143	0.0628047	0.594582	0	0	5.59888	15.4962	PIK3CB;ARF6
Regulation Of Carbohydrate Metabolic Process (GO:0006109)	144	0.0628047	0.594582	0	0	5.59888	15.4962	BCKDK;MLYCD
Regulation Of I-kappaB kinase/NF-kappaB Signaling (GO:0043122)	145	0.0628298	0.594582	0	0	1.80879	5.00551	MAP3K3;PPM1A;USP20;TNIP1;CARD9;MUL1;RIPK1;NOD1;CCDC22;RELA
Positive Regulation Of Establishment Of Protein Localization To Mitochondrion (GO:1903749)	146	0.0652954	0.594582	0	0	3.5042	9.56238	HPS4;NMT1;UBE2L3
Positive Regulation Of Lymphocyte Differentiation (GO:0045621)	147	0.0652954	0.594582	0	0	3.5042	9.56238	SMARCC1;ZBTB1;ARID1B
Positive Regulation Of Protein Dephosphorylation (GO:0035307)	148	0.0652954	0.594582	0	0	3.5042	9.56238	ANKLE2;GNA12;SPPL3
Positive Regulation Of Cellular Biosynthetic Process (GO:0031328)	149	0.0662334	0.594582	0	0	2.05241	5.57141	CTDNEP1;YTHDF1;POLDIP3;AKT2;MID1IP1;ELAVL1;KLF2
Regulation Of Glutamate Receptor Signaling Pathway (GO:1900449)	150	0.068087	0.594582	0	0	27.9415	75.078	PRNP
Regulation Of Immunoglobulin Mediated Immune Response (GO:0002889)	151	0.068087	0.594582	0	0	27.9415	75.078	SUPT6H
Antifungal Innate Immune Response (GO:0061760)	152	0.068087	0.594582	0	0	27.9415	75.078	CARD9
Aorta Development (GO:0035904)	153	0.068087	0.594582	0	0	27.9415	75.078	HECTD1
Arachidonate Transport (GO:1903963)	154	0.068087	0.594582	0	0	27.9415	75.078	PNPLA8
Arachidonic Acid Secretion (GO:0050482)	155	0.068087	0.594582	0	0	27.9415	75.078	PNPLA8
cAMP Biosynthetic Process (GO:0006171)	156	0.068087	0.594582	0	0	27.9415	75.078	ADCY7
cAMP Metabolic Process (GO:0046058)	157	0.068087	0.594582	0	0	27.9415	75.078	ADCY7
Cellular Response To Lipoteichoic Acid (GO:0071223)	158	0.068087	0.594582	0	0	27.9415	75.078	RELA
Citrulline Metabolic Process (GO:0000052)	159	0.068087	0.594582	0	0	27.9415	75.078	CAD
Cyclic Nucleotide Biosynthetic Process (GO:0009190)	160	0.068087	0.594582	0	0	27.9415	75.078	ADCY7
Response To Lipoteichoic Acid (GO:0070391)	161	0.068087	0.594582	0	0	27.9415	75.078	RELA
Response To Lithium Ion (GO:0010226)	162	0.068087	0.594582	0	0	27.9415	75.078	CDKN1B
Glutamate Catabolic Process (GO:0006538)	163	0.068087	0.594582	0	0	27.9415	75.078	GLUD1
Heart Trabecula Formation (GO:0060347)	164	0.068087	0.594582	0	0	27.9415	75.078	POLR2D
Icosanoid Secretion (GO:0032309)	165	0.068087	0.594582	0	0	27.9415	75.078	PNPLA8
Negative Regulation Of Actin Filament Depolymerization (GO:0030835)	166	0.068087	0.594582	0	0	27.9415	75.078	LIMA1
Negative Regulation Of Alpha-Beta T Cell Activation (GO:0046636)	167	0.068087	0.594582	0	0	27.9415	75.078	VSIR
Negative Regulation Of Toll-Like Receptor 2 Signaling Pathway (GO:0034136)	168	0.068087	0.594582	0	0	27.9415	75.078	MFHAS1
poly-N-acetyllactosamine Metabolic Process (GO:0030309)	169	0.068087	0.594582	0	0	27.9415	75.078	B4GAT1
Positive Regulation Of Antigen Processing And Presentation (GO:0002579)	170	0.068087	0.594582	0	0	27.9415	75.078	NOD1
Positive Regulation Of Dendritic Cell Antigen Processing And Presentation (GO:0002606)	171	0.068087	0.594582	0	0	27.9415	75.078	NOD1
Positive Regulation Of Toll-Like Receptor 2 Signaling Pathway (GO:0034137)	172	0.068087	0.594582	0	0	27.9415	75.078	MFHAS1
Cell Cycle G1/S Phase Transition (GO:0044843)	173	0.0694345	0.594582	0	0	2.73801	7.30329	CDKN1B;CUL2;MAP3K11;HINFP
Nucleosome Organization (GO:0034728)	174	0.0694345	0.594582	0	0	2.73801	7.30329	SMARCC1;MCM3AP;GRWD1;SUPT6H
protein-DNA Complex Organization (GO:0071824)	175	0.0694345	0.594582	0	0	2.73801	7.30329	PARP10;HIRIP3;SATB1;EHMT1
Negative Regulation Of Defense Response (GO:0031348)	176	0.0702939	0.594582	0	0	2.38076	6.32108	MFHAS1;FEM1A;PCBP2;MUL1;EXTL3
Positive Regulation Of I-kappaB kinase/NF-kappaB Signaling (GO:0043123)	177	0.0711269	0.594582	0	0	1.90948	5.0473	PPM1A;MAP3K3;CARD9;MUL1;RIPK1;NOD1;CCDC22;RELA
Regulation Of Mitochondrial Membrane Potential (GO:0051881)	178	0.0713281	0.594582	0	0	3.3637	8.88172	SPART;AKT2;BCL2
Lysosome Localization (GO:0032418)	179	0.0713281	0.594582	0	0	3.3637	8.88172	RNF167;PLEKHM2;BORCS6
Regulation Of Inflammatory Response (GO:0050727)	180	0.0718639	0.594582	0	0	2.01012	5.2926	MFHAS1;AKNA;FEM1A;TNIP1;RIPK1;EXTL3;RELA
Cell Chemotaxis (GO:0060326)	181	0.0725688	0.594582	0	0	5.08939	13.3506	ELMO2;PRKCQ
Glutamate Metabolic Process (GO:0006536)	182	0.0725688	0.594582	0	0	5.08939	13.3506	GLUD1;FPGS
Mitotic Chromosome Condensation (GO:0007076)	183	0.0725688	0.594582	0	0	5.08939	13.3506	NCAPH2;PHF13
Negative Regulation Of Translational Initiation (GO:0045947)	184	0.0725688	0.594582	0	0	5.08939	13.3506	RBM4;EIF4EBP2
Nucleosome Disassembly (GO:0006337)	185	0.0725688	0.594582	0	0	5.08939	13.3506	SMARCC1;GRWD1
Positive Regulation Of Interleukin-17 Production (GO:0032740)	186	0.0725688	0.594582	0	0	5.08939	13.3506	PRKCQ;LY9
Positive Regulation Of p38MAPK Cascade (GO:1900745)	187	0.0725688	0.594582	0	0	5.08939	13.3506	MFHAS1;MINK1
Protein Localization To Cell Junction (GO:1902414)	188	0.0725688	0.594582	0	0	5.08939	13.3506	ILF3;JAK1
Purine Ribonucleotide Transport (GO:0015868)	189	0.0725688	0.594582	0	0	5.08939	13.3506	SLC25A17;LRRC8D
Negative Regulation Of Protein Modification Process (GO:0031400)	190	0.0740694	0.594582	0	0	2.67255	6.95599	PRNP;MFHAS1;PPP1R8;CRKL
Organonitrogen Compound Catabolic Process (GO:1901565)	191	0.0740694	0.594582	0	0	2.67255	6.95599	BCKDK;GNPDA2;PNPLA8;RIPK1
Negative Regulation Of Amide Metabolic Process (GO:0034249)	192	0.0741007	0.594582	0	0	2.34085	6.09165	RBM4;PRNP;ILF3;TIA1;RTN4
Positive Regulation Of Telomere Maintenance Via Telomerase (GO:0032212)	193	0.0776011	0.594582	0	0	3.234	8.26667	TNIP1;PRKCQ;MAPK3
Regulation Of JNK Cascade (GO:0046328)	194	0.0780177	0.594582	0	0	2.30224	5.8726	MFHAS1;MINK1;CARD9;RIPK1;MAP3K11
Regulation Of Neuron Apoptotic Process (GO:0043523)	195	0.078857	0.594582	0	0	2.61014	6.63006	PRNP;SIGMAR1;BCL2;RETREG1
Positive Regulation Of Protein Localization To Membrane (GO:1905477)	196	0.078857	0.594582	0	0	2.61014	6.63006	PRNP;AKT2;NMT1;ARF6
protein-RNA Complex Assembly (GO:0022618)	197	0.0791512	0.594582	0	0	1.86157	4.72168	RRP7A;XAB2;SF3A2;PUF60;TNIP1;POLR2D;GEMIN4;DENR
Cellular Response To Growth Factor Stimulus (GO:0071363)	198	0.0808951	0.594582	0	0	2.08223	5.23599	MAP2K3;MED1;MAPKAPK2;RAB35;RELA;CRKL
Regulation Of Immunoglobulin Production (GO:0002637)	199	0.0827817	0.594582	0	0	4.6648	11.6226	POLR2D;SUPT6H
Adenine Nucleotide Transport (GO:0051503)	200	0.0827817	0.594582	0	0	4.6648	11.6226	SLC25A17;LRRC8D
Regulation Of Mitochondrial Membrane Permeability (GO:0046902)	201	0.0827817	0.594582	0	0	4.6648	11.6226	BCL2;MUL1
Regulation Of Nucleocytoplasmic Transport (GO:0046822)	202	0.0827817	0.594582	0	0	4.6648	11.6226	RBM4;FRAT2
Regulation Of Vacuole Organization (GO:0044088)	203	0.0827817	0.594582	0	0	4.6648	11.6226	MTMR3;UBQLN2
Toll-Like Receptor Signaling Pathway (GO:0002224)	204	0.0827817	0.594582	0	0	4.6648	11.6226	TNIP1;MAPKAPK2
Interleukin-1-Mediated Signaling Pathway (GO:0070498)	205	0.0827817	0.594582	0	0	4.6648	11.6226	RELA;MAPK3
Negative Regulation Of Protein Depolymerization (GO:1901880)	206	0.0827817	0.594582	0	0	4.6648	11.6226	LIMA1;MID1IP1
Nucleotide-Sugar Biosynthetic Process (GO:0009226)	207	0.0827817	0.594582	0	0	4.6648	11.6226	GNPDA2;PMM2
Positive Regulation Of Establishment Of Protein Localization (GO:1904951)	208	0.0827817	0.594582	0	0	4.6648	11.6226	DKC1;CEP295
Positive Regulation Of Mitochondrial Translation (GO:0070131)	209	0.0827817	0.594582	0	0	4.6648	11.6226	TRMT10C;RPUSD3
Positive Regulation Of Telomerase RNA Localization To Cajal Body (GO:1904874)	210	0.0827817	0.594582	0	0	4.6648	11.6226	TNIP1;DKC1
Positive Regulation Of Telomere Capping (GO:1904355)	211	0.0827817	0.594582	0	0	4.6648	11.6226	PRKCQ;MAPK3
Positive Regulation Of Transcription By RNA Polymerase III (GO:0045945)	212	0.0827817	0.594582	0	0	4.6648	11.6226	RPTOR;CHD8
rRNA Modification (GO:0000154)	213	0.0827817	0.594582	0	0	4.6648	11.6226	DKC1;TSR3
rRNA Transcription (GO:0009303)	214	0.0827817	0.594582	0	0	4.6648	11.6226	GTF3C2;TCOF1
Positive Regulation Of Growth (GO:0045927)	215	0.0837951	0.594582	0	0	2.55056	6.32381	RPTOR;USP47;BCL2;TAF9B
Water-Soluble Vitamin Metabolic Process (GO:0006767)	216	0.0841066	0.594582	0	0	3.11391	7.70902	FLAD1;FPGS;SLC2A1
Protein Glycosylation (GO:0006486)	217	0.084425	0.594582	0	0	2.05663	5.08378	B4GAT1;PMM2;ST3GAL5;MOGS;MGAT1;STT3B
Protein Phosphorylation (GO:0006468)	218	0.0859074	0.594582	0	0	1.48032	3.63343	MAP3K3;CAD;MINK1;BCKDK;STK10;ILF3;AKT2;GRK6;MAPKAPK2;MKNK2;STK16;PRKCQ;RIPK1;CSNK1G2;MAP3K11;JAK1;MAPK3
Central Nervous System Development (GO:0007417)	219	0.0876945	0.594582	0	0	1.81598	4.41991	DHX30;ANKLE2;UTP3;CHD8;MINK1;SLC2A1;SMG9;RTN4
ncRNA Processing (GO:0034470)	220	0.0917364	0.594582	0	0	2.00726	4.79502	RRP7A;DDX27;INTS1;DKC1;SPPL2B;TSEN54
Regulation Of Transferase Activity (GO:0051338)	221	0.0934007	0.594582	0	0	4.30554	10.2078	PARP4;FEM1A
Cellular Response To Steroid Hormone Stimulus (GO:0071383)	222	0.0934007	0.594582	0	0	4.30554	10.2078	MED1;UBE2L3
Negative Regulation Of Protein Dephosphorylation (GO:0035308)	223	0.0934007	0.594582	0	0	4.30554	10.2078	MFHAS1;PPP1R8
protein-DNA Complex Disassembly (GO:0032986)	224	0.0934007	0.594582	0	0	4.30554	10.2078	SMARCC1;GRWD1
Regulation Of Anoikis (GO:2000209)	225	0.0934007	0.594582	0	0	4.30554	10.2078	BCL2;ITGA5
Protein N-linked Glycosylation (GO:0006487)	226	0.0941123	0.594582	0	0	2.43918	5.76443	PMM2;MOGS;MGAT1;STT3B
Negative Regulation Of DNA-templated Transcription (GO:0045892)	227	0.0952711	0.594582	0	0	1.33525	3.1392	ZNF254;CDKN1B;SATB1;CHD8;SRF;ZMYND8;ZBTB1;EHMT1;RELA;MTA1;TAF9B;ZNF266;MED1;USP47;ZNF263;ZGPAT;NCOA5;ARID5A;RITA1;IRF2BP2;KLF2;PEX14;HINFP;FAM220A;PPM1A;ILF3;RIOX1;TCF3
Positive Regulation Of Phosphorylation (GO:0042327)	228	0.0971359	0.594582	0	0	1.85691	4.32966	AKT2;ERP29;RIPK1;KRAS;CRKL;MOB3A;MAPK3
mRNA Transcription By RNA Polymerase II (GO:0042789)	229	0.0977829	0.594582	0	0	2.89858	6.73921	MED1;ZBTB1;SUPT6H
Positive Regulation Of Telomere Maintenance Via Telomere Lengthening (GO:1904358)	230	0.0977829	0.594582	0	0	2.89858	6.73921	TNIP1;PRKCQ;MAPK3
Organonitrogen Compound Biosynthetic Process (GO:1901566)	231	0.0992227	0.594582	0	0	2.12676	4.91364	GOLPH3;B4GAT1;TNIP1;TRMT12;CSNK1G2
Cellular Response To Reactive Oxygen Species (GO:0034614)	232	0.0994858	0.594582	0	0	2.38704	5.50867	RIPK1;RELA;PEX14;MAPK3
Regulation Of Dendritic Cell Antigen Processing And Presentation (GO:0002604)	233	0.100376	0.594582	0	0	13.9694	32.1131	NOD1
L-ascorbic Acid Metabolic Process (GO:0019852)	234	0.100376	0.594582	0	0	13.9694	32.1131	SLC2A1
T Cell Apoptotic Process (GO:0070231)	235	0.100376	0.594582	0	0	13.9694	32.1131	RIPK1
Adenylate Cyclase-Activating Dopamine Receptor Signaling Pathway (GO:0007191)	236	0.100376	0.594582	0	0	13.9694	32.1131	GNAS
Regulation Of Macrophage Proliferation (GO:0120040)	237	0.100376	0.594582	0	0	13.9694	32.1131	MAPK3
Angiogenesis Involved In Wound Healing (GO:0060055)	238	0.100376	0.594582	0	0	13.9694	32.1131	SRF
Regulation Of Monooxygenase Activity (GO:0032768)	239	0.100376	0.594582	0	0	13.9694	32.1131	POR
Regulation Of Protein Autoubiquitination (GO:1902498)	240	0.100376	0.594582	0	0	13.9694	32.1131	MTA1
Regulation Of Rhodopsin Mediated Signaling Pathway (GO:0022400)	241	0.100376	0.594582	0	0	13.9694	32.1131	NMT1
Regulation Of Smooth Muscle Cell Differentiation (GO:0051150)	242	0.100376	0.594582	0	0	13.9694	32.1131	SRF
Cerebral Cortex Neuron Differentiation (GO:0021895)	243	0.100376	0.594582	0	0	13.9694	32.1131	C21ORF91
Dehydroascorbic Acid Transport (GO:0070837)	244	0.100376	0.594582	0	0	13.9694	32.1131	SLC2A1
Delamination (GO:0060232)	245	0.100376	0.594582	0	0	13.9694	32.1131	AKNA
Detection Of Bacterium (GO:0016045)	246	0.100376	0.594582	0	0	13.9694	32.1131	NOD1
Sensory Perception Of Pain (GO:0019233)	247	0.100376	0.594582	0	0	13.9694	32.1131	RETREG1
Tyrosine Phosphorylation Of STAT Protein (GO:0007260)	248	0.100376	0.594582	0	0	13.9694	32.1131	JAK1
Hemostasis (GO:0007599)	249	0.100376	0.594582	0	0	13.9694	32.1131	HPS4
Hepatocyte Differentiation (GO:0070365)	250	0.100376	0.594582	0	0	13.9694	32.1131	PCK2
Wound Healing, Spreading Of Epidermal Cells (GO:0035313)	251	0.100376	0.594582	0	0	13.9694	32.1131	ITGA5
Zinc Ion Import Into Organelle (GO:0062111)	252	0.100376	0.594582	0	0	13.9694	32.1131	SLC30A5
Insulin Processing (GO:0030070)	253	0.100376	0.594582	0	0	13.9694	32.1131	SLC30A5
Intestinal Cholesterol Absorption (GO:0030299)	254	0.100376	0.594582	0	0	13.9694	32.1131	LIMA1
Leukocyte Apoptotic Process (GO:0071887)	255	0.100376	0.594582	0	0	13.9694	32.1131	PLEKHO2
Mammary Gland Epithelial Cell Differentiation (GO:0060644)	256	0.100376	0.594582	0	0	13.9694	32.1131	AKT2
Megakaryocyte Development (GO:0035855)	257	0.100376	0.594582	0	0	13.9694	32.1131	MED1
Negative Regulation Of CD4-positive, Alpha-Beta T Cell Proliferation (GO:2000562)	258	0.100376	0.594582	0	0	13.9694	32.1131	VSIR
Negative Regulation Of Cardiac Muscle Tissue Growth (GO:0055022)	259	0.100376	0.594582	0	0	13.9694	32.1131	POLR2D
Negative Regulation Of Cell Adhesion Mediated By Integrin (GO:0033629)	260	0.100376	0.594582	0	0	13.9694	32.1131	PDE3B
Negative Regulation Of Keratinocyte Proliferation (GO:0010839)	261	0.100376	0.594582	0	0	13.9694	32.1131	MED1
Nucleotide-Binding Oligomerization Domain Containing 2 Signaling Pathway (GO:0070431)	262	0.100376	0.594582	0	0	13.9694	32.1131	RELA
Positive Regulation Of Glial Cell Migration (GO:1903977)	263	0.100376	0.594582	0	0	13.9694	32.1131	CRKL
Positive Regulation Of Mitochondrial Membrane Potential (GO:0010918)	264	0.100376	0.594582	0	0	13.9694	32.1131	AKT2
Positive Regulation Of Smooth Muscle Contraction (GO:0045987)	265	0.100376	0.594582	0	0	13.9694	32.1131	SRF
Regulation Of AMPA Receptor Activity (GO:2000311)	266	0.100376	0.594582	0	0	13.9694	32.1131	MINK1
ERAD Pathway (GO:0036503)	267	0.10378	0.594582	0	0	2.09481	4.74576	DNAJB2;RHBDD2;STT3B;UBQLN2;TMUB2
acyl-CoA Metabolic Process (GO:0006637)	268	0.104386	0.594582	0	0	3.99761	9.03324	DLST;MLYCD
Carboxylic Acid Metabolic Process (GO:0019752)	269	0.104386	0.594582	0	0	3.99761	9.03324	GLUD1;SLC2A1
Regulation Of Telomerase RNA Localization To Cajal Body (GO:1904872)	270	0.104386	0.594582	0	0	3.99761	9.03324	TNIP1;DKC1
Response To Steroid Hormone (GO:0048545)	271	0.104386	0.594582	0	0	3.99761	9.03324	MED1;UBE2L3
Late Endosome To Vacuole Transport (GO:0045324)	272	0.104386	0.594582	0	0	3.99761	9.03324	LEPROTL1;CHMP7
Negative Regulation Of NIK/NF-kappaB Signaling (GO:1901223)	273	0.104386	0.594582	0	0	3.99761	9.03324	PPM1A;RELA
Negative Regulation Of Intrinsic Apoptotic Signaling Pathway In Response To DNA Damage (GO:1902230)	274	0.104386	0.594582	0	0	3.99761	9.03324	BCL2;TAF9B
Negative Regulation Of Protein Tyrosine Kinase Activity (GO:0061099)	275	0.104386	0.594582	0	0	3.99761	9.03324	ZGPAT;SH3BP5L
Positive Regulation Of Carbohydrate Metabolic Process (GO:0045913)	276	0.104386	0.594582	0	0	3.99761	9.03324	RPTOR;AKT2
Response To Unfolded Protein (GO:0006986)	277	0.104937	0.594582	0	0	2.80168	6.31609	DNAJB2;DNAJC4;STT3B
Negative Regulation Of Angiogenesis (GO:0016525)	278	0.104937	0.594582	0	0	2.80168	6.31609	PDE3B;PIK3CB;KLF2
Positive Regulation Of Catalytic Activity (GO:0043085)	279	0.104937	0.594582	0	0	2.80168	6.31609	CHTOP;MID1IP1;MAPK3
Regulation Of Cellular Component Size (GO:0032535)	280	0.104937	0.594582	0	0	2.80168	6.31609	RPTOR;BORCS6;VAV1
Negative Regulation Of Cell Cycle (GO:0045786)	281	0.104999	0.594582	0	0	2.33708	5.26733	RNF167;CDKN1B;TP53I13;IPO7
Regulation Of Protein Phosphorylation (GO:0001932)	282	0.10963	0.594582	0	0	1.71773	3.79729	PRNP;AKT2;ERP29;RIPK1;KRAS;CRKL;MOB3A;MAPK3
Negative Regulation Of Apoptotic Process (GO:0043066)	283	0.110074	0.594582	0	0	1.47983	3.26541	MED1;USP47;ANKLE2;ARAF;RELA;GOLPH3;AKT2;BCL2;RIPK1;ITGA5;TAF9B;ZNF830;RETREG1;GRINA
Regulation Of Cilium Assembly (GO:1902017)	284	0.110648	0.594582	0	0	2.28915	5.03935	TBC1D1;RABGAP1;TBC1D5;TBC1D10B
Positive Regulation Of DNA Biosynthetic Process (GO:2000573)	285	0.110648	0.594582	0	0	2.28915	5.03935	TNIP1;DKC1;PRKCQ;MAPK3
Adenylate Cyclase-Modulating G Protein-Coupled Receptor Signaling Pathway (GO:0007188)	286	0.11229	0.594582	0	0	2.71103	5.92813	GNA12;GNAS;ADCY7
Interstrand Cross-Link Repair (GO:0036297)	287	0.11229	0.594582	0	0	2.71103	5.92813	RNF8;FAAP100;CENPS
Maturation Of SSU-rRNA (GO:0030490)	288	0.11229	0.594582	0	0	2.71103	5.92813	UTP3;SPPL2B;TSR3
Regulation Of Fatty Acid Biosynthetic Process (GO:0042304)	289	0.115699	0.594582	0	0	3.73073	8.0463	MID1IP1;DCAF5
Chromosome Condensation (GO:0030261)	290	0.115699	0.594582	0	0	3.73073	8.0463	NCAPH2;PHF13
Entrainment Of Circadian Clock By Photoperiod (GO:0043153)	291	0.115699	0.594582	0	0	3.73073	8.0463	RBM4;MTA1
Icosanoid Metabolic Process (GO:0006690)	292	0.115699	0.594582	0	0	3.73073	8.0463	PNPLA8;MAPKAPK2
Photoperiodism (GO:0009648)	293	0.115699	0.594582	0	0	3.73073	8.0463	RBM4;MTA1
Positive Regulation Of Small Molecule Metabolic Process (GO:0062013)	294	0.115699	0.594582	0	0	3.73073	8.0463	RPTOR;AKT2
Protein K48-linked Deubiquitination (GO:0071108)	295	0.115699	0.594582	0	0	3.73073	8.0463	VCPIP1;USP20
mRNA Export From Nucleus (GO:0006406)	296	0.116429	0.594582	0	0	2.24315	4.82382	DDX19A;CHTOP;MCM3AP;POLDIP3
Positive Regulation Of ERK1 And ERK2 Cascade (GO:0070374)	297	0.116429	0.594582	0	0	2.24315	4.82382	MFHAS1;CARD9;CRKL;MAPK3
Negative Regulation Of Transcription By RNA Polymerase II (GO:0000122)	298	0.117331	0.594582	0	0	1.35689	2.90749	ZNF254;MED1;ZNF263;ZGPAT;NCOA5;SATB1;CHD8;ZMYND8;ARID5A;RITA1;ZBTB1;EHMT1;IRF2BP2;KLF2;RELA;FAM220A;PPM1A;MTA1;TCF3;TAF9B;ZNF266
Negative Regulation Of Response To External Stimulus (GO:0032102)	299	0.118056	0.594582	0	0	2.00443	4.28265	MFHAS1;FEM1A;PCBP2;MUL1;EXTL3
Positive Regulation Of Intracellular Signal Transduction (GO:1902533)	300	0.119504	0.594582	0	0	1.45739	3.0961	MAP3K3;CARD9;MUL1;NOD1;PIK3CB;RELA;RTN4;RPTOR;MFHAS1;PPM1A;GOLPH3;RIPK1;CCDC22;EXTL3
Regulation Of Interleukin-8 Production (GO:0032677)	301	0.119834	0.594582	0	0	2.62605	5.57156	NOD1;RIPK1;RELA
Ribosome Biogenesis (GO:0042254)	302	0.119873	0.594582	0	0	1.67877	3.56121	RRP7A;DDX27;TNIP1;DKC1;UTP3;SPPL2B;GRWD1;NIP7
Negative Regulation Of Growth (GO:0045926)	303	0.123011	0.594582	0	0	1.976	4.14066	DNAJB2;CDKN1B;NME6;MUL1;RTN4
Fc-epsilon Receptor Signaling Pathway (GO:0038095)	304	0.127304	0.594582	0	0	3.49721	7.20835	PRKCQ;VAV1
Cellular Response To Osmotic Stress (GO:0071470)	305	0.127304	0.594582	0	0	3.49721	7.20835	RPTOR;LRRC8D
Vascular Endothelial Growth Factor Receptor Signaling Pathway (GO:0048010)	306	0.127304	0.594582	0	0	3.49721	7.20835	MAPKAPK2;VAV1
Positive Regulation Of Insulin Secretion (GO:0032024)	307	0.127304	0.594582	0	0	3.49721	7.20835	GLUD1;POLR2D
Positive Regulation Of Leukocyte Cell-Cell Adhesion (GO:1903039)	308	0.127304	0.594582	0	0	3.49721	7.20835	PRKCQ;RELA
Regulation Of Cell Size (GO:0008361)	309	0.127304	0.594582	0	0	3.49721	7.20835	RPTOR;VAV1
mRNA Transcription (GO:0009299)	310	0.127559	0.594582	0	0	2.54622	5.24312	MED1;ZBTB1;SUPT6H
Phospholipid Transport (GO:0015914)	311	0.127559	0.594582	0	0	2.54622	5.24312	SCP2;ATP9B;PITPNC1
Regulation Of G Protein-Coupled Receptor Signaling Pathway (GO:0008277)	312	0.127559	0.594582	0	0	2.54622	5.24312	USP20;GRK6;NMT1
Negative Regulation Of Cell Growth (GO:0030308)	313	0.128062	0.594582	0	0	1.94836	4.00434	DNAJB2;CDKN1B;NME6;MUL1;RTN4
rRNA Metabolic Process (GO:0016072)	314	0.128062	0.594582	0	0	1.94836	4.00434	RRP7A;EXOSC6;DDX27;DKC1;SPPL2B
Negative Regulation Of Apoptotic Signaling Pathway (GO:2001234)	315	0.128377	0.594582	0	0	2.15644	4.4267	BCL2;RIPK1;RELA;GRINA
Positive Regulation Of DNA-templated Transcription (GO:0045893)	316	0.128709	0.594582	0	0	1.25984	2.58293	ZNF496;AKNA;CHD8;SRF;UBP1;MED16;RELA;RPTOR;MTA1;RIPK1;MAPK3;ESRRA;MAP2K3;MED1;SMARCC1;ZNF263;USP22;MSL2;PTOV1;GTF2F1;ARID1B;USF2;KLF2;HINFP;MSL1;NFKB2;PPM1A;ILF3;TNIP1;MORF4L2;QRICH1;TCF3;CDK13
Regulation Of Chemokine (C-C Motif) Ligand 5 Production (GO:0071649)	317	0.13155	0.594582	0	0	9.31198	18.8881	MUL1
N-acetylneuraminate Catabolic Process (GO:0019262)	318	0.13155	0.594582	0	0	9.31198	18.8881	GNPDA2
NAD Biosynthesis Via Nicotinamide Riboside Salvage Pathway (GO:0034356)	319	0.13155	0.594582	0	0	9.31198	18.8881	PARP10
Regulation Of Growth Hormone Receptor Signaling Pathway (GO:0060398)	320	0.13155	0.594582	0	0	9.31198	18.8881	LEPROTL1
Regulation Of Long-Chain Fatty Acid Import Across Plasma Membrane (GO:0010746)	321	0.13155	0.594582	0	0	9.31198	18.8881	AKT2
Androgen Biosynthetic Process (GO:0006702)	322	0.13155	0.594582	0	0	9.31198	18.8881	MED1
Cardiac Muscle Cell Myoblast Differentiation (GO:0060379)	323	0.13155	0.594582	0	0	9.31198	18.8881	SRF
Cardioblast Differentiation (GO:0010002)	324	0.13155	0.594582	0	0	9.31198	18.8881	SRF
Cellular Response To Angiotensin (GO:1904385)	325	0.13155	0.594582	0	0	9.31198	18.8881	RELA
Regulation Of Toll-Like Receptor 2 Signaling Pathway (GO:0034135)	326	0.13155	0.594582	0	0	9.31198	18.8881	MFHAS1
Cilium Disassembly (GO:0061523)	327	0.13155	0.594582	0	0	9.31198	18.8881	RRP7A
Response To Angiotensin (GO:1990776)	328	0.13155	0.594582	0	0	9.31198	18.8881	RELA
Dicarboxylic Acid Biosynthetic Process (GO:0043650)	329	0.13155	0.594582	0	0	9.31198	18.8881	GLUD1
Short-Chain Fatty Acid Catabolic Process (GO:0019626)	330	0.13155	0.594582	0	0	9.31198	18.8881	PCK2
Striated Muscle Tissue Development (GO:0014706)	331	0.13155	0.594582	0	0	9.31198	18.8881	POLR2D
Glucosamine-Containing Compound Catabolic Process (GO:1901072)	332	0.13155	0.594582	0	0	9.31198	18.8881	GNPDA2
Glutamine Family Amino Acid Catabolic Process (GO:0009065)	333	0.13155	0.594582	0	0	9.31198	18.8881	GLUD1
Glycosyl Compound Biosynthetic Process (GO:1901659)	334	0.13155	0.594582	0	0	9.31198	18.8881	TRMT12
Guanine Nucleotide Transmembrane Transport (GO:1903790)	335	0.13155	0.594582	0	0	9.31198	18.8881	LRRC8D
Vasodilation (GO:0042311)	336	0.13155	0.594582	0	0	9.31198	18.8881	KLF2
Wybutosine Biosynthetic Process (GO:0031591)	337	0.13155	0.594582	0	0	9.31198	18.8881	TRMT12
Wybutosine Metabolic Process (GO:0031590)	338	0.13155	0.594582	0	0	9.31198	18.8881	TRMT12
Intestinal Lipid Absorption (GO:0098856)	339	0.13155	0.594582	0	0	9.31198	18.8881	LIMA1
Leucine Transport (GO:0015820)	340	0.13155	0.594582	0	0	9.31198	18.8881	SLC43A1
Locomotor Rhythm (GO:0045475)	341	0.13155	0.594582	0	0	9.31198	18.8881	MTA1
Lymphocyte Apoptotic Process (GO:0070227)	342	0.13155	0.594582	0	0	9.31198	18.8881	RIPK1
mRNA 3'-Splice Site Recognition (GO:0000389)	343	0.13155	0.594582	0	0	9.31198	18.8881	SF3A2
mRNA 5'-Splice Site Recognition (GO:0000395)	344	0.13155	0.594582	0	0	9.31198	18.8881	PSIP1
Maintenance Of Gastrointestinal Epithelium (GO:0030277)	345	0.13155	0.594582	0	0	9.31198	18.8881	POLR2D
Mammary Gland Epithelium Development (GO:0061180)	346	0.13155	0.594582	0	0	9.31198	18.8881	AKT2
Negative Regulation Of CD8-positive, Alpha-Beta T Cell Activation (GO:2001186)	347	0.13155	0.594582	0	0	9.31198	18.8881	VSIR
Negative Regulation Of RNA Catabolic Process (GO:1902369)	348	0.13155	0.594582	0	0	9.31198	18.8881	TNIP1
Negative Regulation Of T Cell Apoptotic Process (GO:0070233)	349	0.13155	0.594582	0	0	9.31198	18.8881	PRKCQ
Negative Regulation Of Amyloid-Beta Clearance (GO:1900222)	350	0.13155	0.594582	0	0	9.31198	18.8881	SRF
Negative Regulation Of Toll-Like Receptor 4 Signaling Pathway (GO:0034144)	351	0.13155	0.594582	0	0	9.31198	18.8881	MFHAS1
Negative Regulation Of Vascular Endothelial Growth Factor Signaling Pathway (GO:1900747)	352	0.13155	0.594582	0	0	9.31198	18.8881	PIK3CB
Nucleoside Triphosphate Metabolic Process (GO:0009141)	353	0.13155	0.594582	0	0	9.31198	18.8881	DCTPP1
Phosphatidylcholine Catabolic Process (GO:0034638)	354	0.13155	0.594582	0	0	9.31198	18.8881	PNPLA8
Positive Regulation Of Macrophage Chemotaxis (GO:0010759)	355	0.13155	0.594582	0	0	9.31198	18.8881	MAPK3
Positive Regulation Of Myeloid Cell Apoptotic Process (GO:0033034)	356	0.13155	0.594582	0	0	9.31198	18.8881	PIK3CB
Prostanoid Biosynthetic Process (GO:0046457)	357	0.13155	0.594582	0	0	9.31198	18.8881	PNPLA8
Protein Localization To Endoplasmic Reticulum Exit Site (GO:0070973)	358	0.13155	0.594582	0	0	9.31198	18.8881	SEC16A
Regulation Of CD8-positive, Alpha-Beta T Cell Proliferation (GO:2000564)	359	0.13155	0.594582	0	0	9.31198	18.8881	VSIR
Regulation Of DNA-templated Transcription In Response To Stress (GO:0043620)	360	0.13155	0.594582	0	0	9.31198	18.8881	RELA
Regulation Of RNA Biosynthetic Process (GO:2001141)	361	0.13155	0.594582	0	0	9.31198	18.8881	MED1
Regulation Of Anion Channel Activity (GO:0010359)	362	0.13155	0.594582	0	0	9.31198	18.8881	PRNP
Positive Regulation Of Macromolecule Metabolic Process (GO:0010604)	363	0.132619	0.594582	0	0	1.58205	3.19618	MED1;ERP29;KRAS;RIPK1;PIK3CB;KLF2;RELA;VSIR;HINFP
Phosphatidylinositol Biosynthetic Process (GO:0006661)	364	0.133206	0.594582	0	0	1.92147	3.87342	MTMR3;SLC30A5;PIP5K1B;PI4KB;PIK3CB
Protein Modification By Small Protein Removal (GO:0070646)	365	0.133206	0.594582	0	0	1.92147	3.87342	VCPIP1;SENP7;USP47;USP20;USP22
Circulatory System Development (GO:0072359)	366	0.134536	0.594582	0	0	2.11554	4.24362	CDKN1B;SRF;POLR2D;SMG9
Transcription Initiation At RNA Polymerase II Promoter (GO:0006367)	367	0.134536	0.594582	0	0	2.11554	4.24362	MED1;POLR2D;MED16;GTF2F1
Regulation Of TOR Signaling (GO:0032006)	368	0.134536	0.594582	0	0	2.11554	4.24362	RPTOR;GOLPH3;GNA12;ARAF
Positive Regulation Of TOR Signaling (GO:0032008)	369	0.135456	0.594582	0	0	2.47108	4.93996	RPTOR;RNF167;GOLPH3
Regulation Of Receptor-Mediated Endocytosis (GO:0048259)	370	0.139168	0.594582	0	0	3.29116	6.4904	PIK3CB;ARF6
Endosome Transport Via Multivesicular Body Sorting Pathway (GO:0032509)	371	0.139168	0.594582	0	0	3.29116	6.4904	LEPROTL1;CHMP7
Organelle Membrane Fusion (GO:0090174)	372	0.139168	0.594582	0	0	3.29116	6.4904	VCPIP1;STX16
Positive Regulation Of Peptide Hormone Secretion (GO:0090277)	373	0.139168	0.594582	0	0	3.29116	6.4904	GLUD1;POLR2D
Postreplication Repair (GO:0006301)	374	0.139168	0.594582	0	0	3.29116	6.4904	PARP10;ZBTB1
Cellular Response To Metal Ion (GO:0071248)	375	0.140813	0.594582	0	0	2.07615	4.06994	PRNP;CDKN1B;ADCY7;MAPK3
Macromolecule Modification (GO:0043412)	376	0.140813	0.594582	0	0	2.07615	4.06994	PARP4;AKT2;ARAF;UBE2L3
Regulation Of Hydrolase Activity (GO:0051336)	377	0.143517	0.594582	0	0	2.40024	4.6596	RABGAP1;VAV1;TBC1D10B
Regulation Of Alternative mRNA Splicing, Via Spliceosome (GO:0000381)	378	0.143517	0.594582	0	0	2.40024	4.6596	RBM4;TIA1;PUF60
Brain Development (GO:0007420)	379	0.143767	0.594582	0	0	1.86986	3.62671	UTP3;CHD8;MINK1;SMG9;RTN4
Proteasome-Mediated Ubiquitin-Dependent Protein Catabolic Process (GO:0043161)	380	0.14475	0.594582	0	0	1.42494	2.75406	FBXW5;FEM1A;RHBDD2;AMFR;CUL2;TMUB2;DNAJB2;HECTD1;MTA1;UBXN11;PCBP2;STT3B;UBQLN2
RNA Methylation (GO:0001510)	381	0.147204	0.594582	0	0	2.0382	3.90507	TRMT10C;TRMO;TRMT12;THUMPD3
Positive Regulation Of T Cell Activation (GO:0050870)	382	0.147204	0.594582	0	0	2.0382	3.90507	SMARCC1;ZBTB1;PRKCQ;ARID1B
Positive Regulation Of Cell Growth (GO:0030307)	383	0.147204	0.594582	0	0	2.0382	3.90507	RPTOR;USP47;BCL2;TAF9B
Response To UV (GO:0009411)	384	0.149179	0.594582	0	0	1.84507	3.51045	USP47;TP53I13;REV1;ZBTB1;RELA
Regulation Of Centrosome Cycle (GO:0046605)	385	0.151259	0.594582	0	0	3.10801	5.87028	FBXW5;MCM2
Fc Receptor Signaling Pathway (GO:0038093)	386	0.151259	0.594582	0	0	3.10801	5.87028	PRKCQ;VAV1
Regulation Of Protein Tyrosine Kinase Activity (GO:0061097)	387	0.151259	0.594582	0	0	3.10801	5.87028	PRNP;SH3BP5L
Cellular Response To Acid Chemical (GO:0071229)	388	0.151259	0.594582	0	0	3.10801	5.87028	RPTOR;KLF2
Regulation Of Telomere Capping (GO:1904353)	389	0.151259	0.594582	0	0	3.10801	5.87028	PRKCQ;MAPK3
Stress-Activated Protein Kinase Signaling Cascade (GO:0031098)	390	0.151259	0.594582	0	0	3.10801	5.87028	MAP2K3;MAPK3
Organophosphate Ester Transport (GO:0015748)	391	0.151259	0.594582	0	0	3.10801	5.87028	SCP2;PITPNC1
Protein N-linked Glycosylation Via Asparagine (GO:0018279)	392	0.151259	0.594582	0	0	3.10801	5.87028	MGAT1;STT3B
Regulation Of calcineurin-NFAT Signaling Cascade (GO:0070884)	393	0.151259	0.594582	0	0	3.10801	5.87028	PRNP;SPPL3
Regulation Of Cytokine Production (GO:0001817)	394	0.154676	0.594582	0	0	1.82093	3.39861	BTN3A1;MAPKAPK2;CARD9;ZBTB1;PLD3
Regulation Of Proteasomal Ubiquitin-Dependent Protein Catabolic Process (GO:0032434)	395	0.154676	0.594582	0	0	1.82093	3.39861	DNAJB2;ZER1;HECTD1;GNA12;ARAF
Endoplasmic Reticulum Organization (GO:0007029)	396	0.160093	0.594582	0	0	2.27004	4.15873	VCPIP1;SEC16A;RTN4
Nuclear Export (GO:0051168)	397	0.160093	0.594582	0	0	2.27004	4.15873	CDKN1B;XPO6;RITA1
Positive Regulation Of Transferase Activity (GO:0051347)	398	0.160256	0.594582	0	0	1.7974	3.291	TNIP1;DKC1;PRKCQ;UBE2L3;MAPK3
tRNA Modification (GO:0006400)	399	0.160314	0.594582	0	0	1.96629	3.59954	YRDC;TRMO;TRMT12;THUMPD3
Positive Regulation Of Proteasomal Ubiquitin-Dependent Protein Catabolic Process (GO:0032436)	400	0.160314	0.594582	0	0	1.96629	3.59954	DNAJB2;ZER1;HECTD1;UBQLN2
Positive Regulation Of Ubiquitin-Dependent Protein Catabolic Process (GO:2000060)	401	0.160314	0.594582	0	0	1.96629	3.59954	DNAJB2;ZER1;HECTD1;CCDC22
Regulation Of Canonical Wnt Signaling Pathway (GO:0060828)	402	0.161595	0.594582	0	0	1.68339	3.06825	USP47;PPM1A;SDHAF2;CHD8;AMFR;CSNK1G2
5S Class rRNA Transcription By RNA Polymerase III (GO:0042791)	403	0.161647	0.594582	0	0	6.98329	12.7259	GTF3C2
Regulation Of Dendritic Spine Maintenance (GO:1902950)	404	0.161647	0.594582	0	0	6.98329	12.7259	PRNP
GDP-mannose Metabolic Process (GO:0019673)	405	0.161647	0.594582	0	0	6.98329	12.7259	PMM2
PERK-mediated Unfolded Protein Response (GO:0036499)	406	0.161647	0.594582	0	0	6.98329	12.7259	QRICH1
Regulation Of Hydrogen Peroxide-Induced Cell Death (GO:1903205)	407	0.161647	0.594582	0	0	6.98329	12.7259	RIPK1
Regulation Of Inclusion Body Assembly (GO:0090083)	408	0.161647	0.594582	0	0	6.98329	12.7259	DNAJB2
Regulation Of Inflammatory Response To Wounding (GO:0106014)	409	0.161647	0.594582	0	0	6.98329	12.7259	EXTL3
Regulation Of mRNA Export From Nucleus (GO:0010793)	410	0.161647	0.594582	0	0	6.98329	12.7259	SUPT6H
Alpha-Amino Acid Biosynthetic Process (GO:1901607)	411	0.161647	0.594582	0	0	6.98329	12.7259	CAD
Regulation Of Mammary Gland Epithelial Cell Proliferation (GO:0033599)	412	0.161647	0.594582	0	0	6.98329	12.7259	RTN4
Amino Sugar Catabolic Process (GO:0046348)	413	0.161647	0.594582	0	0	6.98329	12.7259	GNPDA2
Regulation Of Mitochondrial Depolarization (GO:0051900)	414	0.161647	0.594582	0	0	6.98329	12.7259	BCL2
Axonal Fasciculation (GO:0007413)	415	0.161647	0.594582	0	0	6.98329	12.7259	RTN4
Regulation Of Pentose-Phosphate Shunt (GO:0043456)	416	0.161647	0.594582	0	0	6.98329	12.7259	RPTOR
Branched-Chain Amino Acid Transport (GO:0015803)	417	0.161647	0.594582	0	0	6.98329	12.7259	SLC43A1
Regulation Of Protein Deubiquitination (GO:0090085)	418	0.161647	0.594582	0	0	6.98329	12.7259	TNIP1
Cell Migration Involved In Sprouting Angiogenesis (GO:0002042)	419	0.161647	0.594582	0	0	6.98329	12.7259	SRF
Regulation Of Ribonucleoprotein Complex Localization (GO:2000197)	420	0.161647	0.594582	0	0	6.98329	12.7259	SUPT6H
Cellular Response To Interleukin-9 (GO:0071355)	421	0.161647	0.594582	0	0	6.98329	12.7259	JAK1
Cellular Response To Laminar Fluid Shear Stress (GO:0071499)	422	0.161647	0.594582	0	0	6.98329	12.7259	KLF2
Regulation Of Tumor Necrosis Factor Superfamily Cytokine Production (GO:1903555)	423	0.161647	0.594582	0	0	6.98329	12.7259	MAPKAPK2
Cellular Response To Type III Interferon (GO:0071358)	424	0.161647	0.594582	0	0	6.98329	12.7259	JAK1
Response To Iron Ion (GO:0010039)	425	0.161647	0.594582	0	0	6.98329	12.7259	BCL2
Defense Response To Fungus (GO:0050832)	426	0.161647	0.594582	0	0	6.98329	12.7259	CARD9
Dendritic Spine Maintenance (GO:0097062)	427	0.161647	0.594582	0	0	6.98329	12.7259	PRNP
Ribose Phosphate Biosynthetic Process (GO:0046390)	428	0.161647	0.594582	0	0	6.98329	12.7259	PRPSAP1
Ruffle Assembly (GO:0097178)	429	0.161647	0.594582	0	0	6.98329	12.7259	ARF6
Epithelial Structure Maintenance (GO:0010669)	430	0.161647	0.594582	0	0	6.98329	12.7259	POLR2D
Store-Operated Calcium Entry (GO:0002115)	431	0.161647	0.594582	0	0	6.98329	12.7259	STIM2
Fatty Acid Alpha-Oxidation (GO:0001561)	432	0.161647	0.594582	0	0	6.98329	12.7259	SLC25A17
Gamma-Delta T Cell Activation (GO:0046629)	433	0.161647	0.594582	0	0	6.98329	12.7259	TCF7
Type III Interferon-Mediated Signaling Pathway (GO:0038196)	434	0.161647	0.594582	0	0	6.98329	12.7259	JAK1
Immunoglobulin V(D)J Recombination (GO:0033152)	435	0.161647	0.594582	0	0	6.98329	12.7259	TCF3
Innate Immune Response-Activating Signaling Pathway (GO:0002758)	436	0.161647	0.594582	0	0	6.98329	12.7259	NOD1
Interleukin-4-Mediated Signaling Pathway (GO:0035771)	437	0.161647	0.594582	0	0	6.98329	12.7259	JAK1
Interleukin-9-Mediated Signaling Pathway (GO:0038113)	438	0.161647	0.594582	0	0	6.98329	12.7259	JAK1
Macropinocytosis (GO:0044351)	439	0.161647	0.594582	0	0	6.98329	12.7259	MAPKAPK2
Mitochondrial RNA 3'-End Processing (GO:0000965)	440	0.161647	0.594582	0	0	6.98329	12.7259	TRMT10C
Mitochondrial tRNA Processing (GO:0090646)	441	0.161647	0.594582	0	0	6.98329	12.7259	TRMT10C
Multi-Pass Transmembrane Protein Insertion Into ER Membrane (GO:0160063)	442	0.161647	0.594582	0	0	6.98329	12.7259	TMEM147
Myeloid Leukocyte Mediated Immunity (GO:0002444)	443	0.161647	0.594582	0	0	6.98329	12.7259	CARD9
Negative Regulation Of Activated T Cell Proliferation (GO:0046007)	444	0.161647	0.594582	0	0	6.98329	12.7259	PRNP
Negative Regulation Of Alpha-Beta T Cell Proliferation (GO:0046642)	445	0.161647	0.594582	0	0	6.98329	12.7259	VSIR
Negative Regulation Of Cell Cycle G2/M Phase Transition (GO:1902750)	446	0.161647	0.594582	0	0	6.98329	12.7259	USP47
Negative Regulation Of Cellular Response To Vascular Endothelial Growth Factor Stimulus (GO:1902548)	447	0.161647	0.594582	0	0	6.98329	12.7259	PIK3CB
Negative Regulation Of Inclusion Body Assembly (GO:0090084)	448	0.161647	0.594582	0	0	6.98329	12.7259	DNAJB2
Negative Regulation Of Interleukin-10 Production (GO:0032693)	449	0.161647	0.594582	0	0	6.98329	12.7259	VSIR
Negative Regulation Of Lymphocyte Apoptotic Process (GO:0070229)	450	0.161647	0.594582	0	0	6.98329	12.7259	PRKCQ
Negative Regulation Of miRNA-mediated Gene Silencing (GO:0060965)	451	0.161647	0.594582	0	0	6.98329	12.7259	ELAVL1
Negative Regulation Of Mitochondrial Fusion (GO:0010637)	452	0.161647	0.594582	0	0	6.98329	12.7259	MUL1
Negative Regulation Of Protein Maturation (GO:1903318)	453	0.161647	0.594582	0	0	6.98329	12.7259	PRNP
Negative Regulation Of Protein Polyubiquitination (GO:1902915)	454	0.161647	0.594582	0	0	6.98329	12.7259	PARP10
Negative Regulation Of Vascular Associated Smooth Muscle Cell Proliferation (GO:1904706)	455	0.161647	0.594582	0	0	6.98329	12.7259	CDKN1B
Neuron Projection Fasciculation (GO:0106030)	456	0.161647	0.594582	0	0	6.98329	12.7259	RTN4
Polyadenylation-Dependent snoRNA 3'-End Processing (GO:0071051)	457	0.161647	0.594582	0	0	6.98329	12.7259	EXOSC6
Positive Regulation Of ER-associated Ubiquitin-Dependent Protein Catabolic Process (GO:1903071)	458	0.161647	0.594582	0	0	6.98329	12.7259	UBQLN2
Positive Regulation Of Cell Migration Involved In Sprouting Angiogenesis (GO:0090050)	459	0.161647	0.594582	0	0	6.98329	12.7259	MAP3K3
Positive Regulation Of Fatty Acid Beta-Oxidation (GO:0032000)	460	0.161647	0.594582	0	0	6.98329	12.7259	AKT2
Positive Regulation Of Glycogen Biosynthetic Process (GO:0045725)	461	0.161647	0.594582	0	0	6.98329	12.7259	AKT2
Positive Regulation Of Leukocyte Apoptotic Process (GO:2000108)	462	0.161647	0.594582	0	0	6.98329	12.7259	PIK3CB
Positive Regulation Of Macrophage Migration (GO:1905523)	463	0.161647	0.594582	0	0	6.98329	12.7259	MAPK3
Positive Regulation Of Membrane Potential (GO:0045838)	464	0.161647	0.594582	0	0	6.98329	12.7259	AKT2
Positive Regulation Of Muscle Contraction (GO:0045933)	465	0.161647	0.594582	0	0	6.98329	12.7259	SRF
Positive Regulation Of Necroptotic Process (GO:0060545)	466	0.161647	0.594582	0	0	6.98329	12.7259	RIPK1
Positive Regulation Of Necrotic Cell Death (GO:0010940)	467	0.161647	0.594582	0	0	6.98329	12.7259	RIPK1
Positive Regulation Of Programmed Necrotic Cell Death (GO:0062100)	468	0.161647	0.594582	0	0	6.98329	12.7259	RIPK1
Protein K29-linked Ubiquitination (GO:0035519)	469	0.161647	0.594582	0	0	6.98329	12.7259	RNF167
protein-DNA Covalent Cross-Linking Repair (GO:0106300)	470	0.161647	0.594582	0	0	6.98329	12.7259	VCPIP1
Regulation Of T Cell Apoptotic Process (GO:0070232)	471	0.161647	0.594582	0	0	6.98329	12.7259	PRKCQ
Regulation Of T Cell Mediated Immunity (GO:0002709)	472	0.161647	0.594582	0	0	6.98329	12.7259	ZBTB1
Regulation Of Biosynthetic Process (GO:0009889)	473	0.161647	0.594582	0	0	6.98329	12.7259	MID1IP1
Gene Expression (GO:0010467)	474	0.162174	0.594582	0	0	1.41293	2.57024	EXOSC6;RBM4;CHTOP;GOLPH3;MCM3AP;TSPAN14;TNIP1;DKC1;RPLP2;EIF4EBP2;ZNF830;LMF2
Cellular Response To Ketone (GO:1901655)	475	0.163547	0.594582	0	0	2.94413	5.3308	GOLPH3;PCK2
Unsaturated Fatty Acid Metabolic Process (GO:0033559)	476	0.163547	0.594582	0	0	2.94413	5.3308	SCP2;PNPLA8
Negative Regulation Of Receptor-Mediated Endocytosis (GO:0048261)	477	0.163547	0.594582	0	0	2.94413	5.3308	UBQLN2;ARF6
Positive Regulation Of Immunoglobulin Production (GO:0002639)	478	0.163547	0.594582	0	0	2.94413	5.3308	POLR2D;KMT5B
Protein Localization To Chromatin (GO:0071168)	479	0.163547	0.594582	0	0	2.94413	5.3308	ZMYND8;CHMP7
Negative Regulation Of Translation (GO:0017148)	480	0.165917	0.594582	0	0	1.77447	3.18742	RBM4;ILF3;TIA1;YTHDF1;EIF4EBP2
Protein Localization To Organelle (GO:0033365)	481	0.166575	0.594582	0	0	1.66655	2.98699	CTDNEP1;ARFRP1;TIA1;RAB35;IPO4;ARF6
Regulation Of mRNA Catabolic Process (GO:0061013)	482	0.16859	0.594582	0	0	2.21008	3.93458	YTHDF1;MAPKAPK2;GTPBP1
Cellular Response To Hormone Stimulus (GO:0032870)	483	0.16859	0.594582	0	0	2.21008	3.93458	MED1;ARID5A;UBE2L3
Regulation Of Type II Interferon Production (GO:0032649)	484	0.16859	0.594582	0	0	2.21008	3.93458	PRNP;BTN3A1;VSIR
Negative Regulation Of Extrinsic Apoptotic Signaling Pathway (GO:2001237)	485	0.16859	0.594582	0	0	2.21008	3.93458	BCL2;RIPK1;RELA
Organic Anion Transport (GO:0015711)	486	0.16859	0.594582	0	0	2.21008	3.93458	SLC25A17;SLC2A1;LRRC8D
Negative Regulation Of Signal Transduction (GO:0009968)	487	0.169242	0.594582	0	0	1.58448	2.81472	MFHAS1;LEPROTL1;RITA1;BCL2;PRKCQ;PIK3CB;GRINA
Positive Regulation Of Amide Metabolic Process (GO:0034250)	488	0.173832	0.594582	0	0	1.89926	3.32306	YTHDF1;POLDIP3;ELAVL1;RELA
Regulation Of Mitochondrial Translation (GO:0070129)	489	0.176004	0.594582	0	0	2.79665	4.85847	TRMT10C;RPUSD3
Response To Epidermal Growth Factor (GO:0070849)	490	0.176004	0.594582	0	0	2.79665	4.85847	MED1;MAPK3
Gluconeogenesis (GO:0006094)	491	0.176004	0.594582	0	0	2.79665	4.85847	POLR2D;PCK2
Intrinsic Apoptotic Signaling Pathway In Response To Endoplasmic Reticulum Stress (GO:0070059)	492	0.176004	0.594582	0	0	2.79665	4.85847	BCL2;QRICH1
Late Endosome To Vacuole Transport Via Multivesicular Body Sorting Pathway (GO:0032511)	493	0.176004	0.594582	0	0	2.79665	4.85847	LEPROTL1;CHMP7
Positive Regulation Of Pattern Recognition Receptor Signaling Pathway (GO:0062208)	494	0.176004	0.594582	0	0	2.79665	4.85847	MFHAS1;RTN4
Regulation Of DNA Biosynthetic Process (GO:2000278)	495	0.176004	0.594582	0	0	2.79665	4.85847	PARP4;JADE2
Ribonucleoprotein Complex Biogenesis (GO:0022613)	496	0.176725	0.594582	0	0	1.63387	2.83175	RRP7A;TNIP1;UTP3;SPPL2B;GRWD1;NIP7
Intracellular Protein Transmembrane Transport (GO:0065002)	497	0.177215	0.594582	0	0	2.1532	3.72588	AKT2;DNLZ;PEX14
Lipid Biosynthetic Process (GO:0008610)	498	0.177215	0.594582	0	0	2.1532	3.72588	SCP2;MLYCD;AGPAT3
Negative Regulation Of Phosphorylation (GO:0042326)	499	0.177215	0.594582	0	0	2.1532	3.72588	PRNP;CDKN1B;CRKL
Negative Regulation Of Viral Process (GO:0048525)	500	0.177215	0.594582	0	0	2.1532	3.72588	ILF3;TNIP1;UBP1
Positive Regulation Of Protein Kinase B Signaling (GO:0051897)	501	0.177215	0.594582	0	0	2.1532	3.72588	MFHAS1;PIK3CB;RTN4
Regulation Of ERK1 And ERK2 Cascade (GO:0070372)	502	0.177472	0.594582	0	0	1.73031	2.9916	MFHAS1;TNIP1;CARD9;CRKL;MAPK3
Phosphorylation (GO:0016310)	503	0.179354	0.594582	0	0	1.34493	2.31112	MINK1;PIK3CB;BCKDK;RPTOR;STK10;ILF3;GRK6;MAPKAPK2;MKNK2;PRKCQ;CSNK1G2;MAP3K11;JAK1;MAPK3
Cellular Response To Insulin Stimulus (GO:0032869)	504	0.180735	0.594582	0	0	1.86742	3.19463	INSIG2;AKT2;PDE3B;PCK2
Regulation Of Protein Binding (GO:0043393)	505	0.183361	0.594582	0	0	1.70903	2.89904	DNAJB2;AMFR;GTF2F1;SPPL3;PEX14
Positive Regulation Of Translation (GO:0045727)	506	0.183361	0.594582	0	0	1.70903	2.89904	YTHDF1;TRMT10C;POLDIP3;RPUSD3;ELAVL1
Phosphatidylinositol Metabolic Process (GO:0046488)	507	0.185958	0.594582	0	0	2.09916	3.53127	MTMR3;PIP5K1B;PI4KB
Heart Development (GO:0007507)	508	0.187727	0.594582	0	0	1.83662	3.07223	CDKN1B;SRF;POLR2D;SMG9
DNA Synthesis Involved In DNA Repair (GO:0000731)	509	0.188604	0.594582	0	0	2.66321	4.44251	PARP10;ZBTB1
Adenylate Cyclase-Activating G Protein-Coupled Receptor Signaling Pathway (GO:0007189)	510	0.188604	0.594582	0	0	2.66321	4.44251	GNAS;ADCY7
Cellular Response To Alcohol (GO:0097306)	511	0.188604	0.594582	0	0	2.66321	4.44251	GOLPH3;ADCY7
Regulation Of Transcription By RNA Polymerase III (GO:0006359)	512	0.188604	0.594582	0	0	2.66321	4.44251	RPTOR;CHD8
Regulation Of Transport (GO:0051049)	513	0.188604	0.594582	0	0	2.66321	4.44251	YRDC;MUL1
Positive Regulation Of Blood Vessel Endothelial Cell Migration (GO:0043536)	514	0.188604	0.594582	0	0	2.66321	4.44251	MAP2K3;MAP3K3
Positive Regulation Of Cell Death (GO:0010942)	515	0.188604	0.594582	0	0	2.66321	4.44251	PRNP;RIPK1
Positive Regulation Of miRNA Transcription (GO:1902895)	516	0.188604	0.594582	0	0	2.66321	4.44251	SRF;RELA
Regulation Of Calcium Ion Transport (GO:0051924)	517	0.188604	0.594582	0	0	2.66321	4.44251	STIM2;BCL2
Regulation Of Cell-Substrate Adhesion (GO:0010810)	518	0.188604	0.594582	0	0	2.66321	4.44251	MINK1;PIK3CB
Positive Regulation Of NF-kappaB Transcription Factor Activity (GO:0051092)	519	0.189321	0.594582	0	0	1.68827	2.80982	CARD9;PRKCQ;RIPK1;NOD1;RELA
Regulation Of Centriole Elongation (GO:1903722)	520	0.190703	0.594582	0	0	5.58607	9.25634	CEP295
CD40 Signaling Pathway (GO:0023035)	521	0.190703	0.594582	0	0	5.58607	9.25634	ITGA5
MyD88-dependent Toll-Like Receptor Signaling Pathway (GO:0002755)	522	0.190703	0.594582	0	0	5.58607	9.25634	TNIP1
Regulation Of Keratinocyte Migration (GO:0051547)	523	0.190703	0.594582	0	0	5.58607	9.25634	ARF6
Acylglycerol Homeostasis (GO:0055090)	524	0.190703	0.594582	0	0	5.58607	9.25634	PNPLA8
Regulation Of Lysosome Size (GO:0062196)	525	0.190703	0.594582	0	0	5.58607	9.25634	BORCS6
Alpha-Linolenic Acid Metabolic Process (GO:0036109)	526	0.190703	0.594582	0	0	5.58607	9.25634	SCP2
Regulation Of Necrotic Cell Death (GO:0010939)	527	0.190703	0.594582	0	0	5.58607	9.25634	RIPK1
Cell Projection Assembly (GO:0030031)	528	0.190703	0.594582	0	0	5.58607	9.25634	PARVG
Cellular Response To Interleukin-2 (GO:0071352)	529	0.190703	0.594582	0	0	5.58607	9.25634	JAK1
Regulation Of Vascular Endothelial Growth Factor Signaling Pathway (GO:1900746)	530	0.190703	0.594582	0	0	5.58607	9.25634	PIK3CB
Cyclic Nucleotide Transport (GO:0070729)	531	0.190703	0.594582	0	0	5.58607	9.25634	LRRC8D
Response To Interleukin-4 (GO:0070670)	532	0.190703	0.594582	0	0	5.58607	9.25634	TCF7
Defense Response To Tumor Cell (GO:0002357)	533	0.190703	0.594582	0	0	5.58607	9.25634	RELA
Digestive Tract Development (GO:0048565)	534	0.190703	0.594582	0	0	5.58607	9.25634	CHD8
Ribonucleoside Bisphosphate Catabolic Process (GO:0034031)	535	0.190703	0.594582	0	0	5.58607	9.25634	MLYCD
Sensory Perception Of Chemical Stimulus (GO:0007606)	536	0.190703	0.594582	0	0	5.58607	9.25634	GNAS
Steroid Hormone Biosynthetic Process (GO:0120178)	537	0.190703	0.594582	0	0	5.58607	9.25634	MED1
Steroid Hormone Mediated Signaling Pathway (GO:0043401)	538	0.190703	0.594582	0	0	5.58607	9.25634	MED1
tRNA 3'-End Processing (GO:0042780)	539	0.190703	0.594582	0	0	5.58607	9.25634	TRMT10C
Thymus Development (GO:0048538)	540	0.190703	0.594582	0	0	5.58607	9.25634	ZBTB1
Transcription-Coupled Nucleotide-Excision Repair (GO:0006283)	541	0.190703	0.594582	0	0	5.58607	9.25634	XAB2
Hexose Transmembrane Transport (GO:0008645)	542	0.190703	0.594582	0	0	5.58607	9.25634	SLC2A1
Histone H4-K12 Acetylation (GO:0043983)	543	0.190703	0.594582	0	0	5.58607	9.25634	JADE2
Insulin Metabolic Process (GO:1901142)	544	0.190703	0.594582	0	0	5.58607	9.25634	SLC30A5
Interleukin-2-Mediated Signaling Pathway (GO:0038110)	545	0.190703	0.594582	0	0	5.58607	9.25634	JAK1
Linoleic Acid Metabolic Process (GO:0043651)	546	0.190703	0.594582	0	0	5.58607	9.25634	PNPLA8
Negative Regulation Of CD4-positive, Alpha-Beta T Cell Activation (GO:2000515)	547	0.190703	0.594582	0	0	5.58607	9.25634	VSIR
Negative Regulation Of cAMP-mediated Signaling (GO:0043951)	548	0.190703	0.594582	0	0	5.58607	9.25634	PDE3B
Negative Regulation Of Lipid Catabolic Process (GO:0050995)	549	0.190703	0.594582	0	0	5.58607	9.25634	PDE3B
Negative Regulation Of Lipid Metabolic Process (GO:0045833)	550	0.190703	0.594582	0	0	5.58607	9.25634	PDE3B
Negative Regulation Of Protein K63-linked Ubiquitination (GO:1900045)	551	0.190703	0.594582	0	0	5.58607	9.25634	PARP10
Negative Regulation Of Protein Processing (GO:0010955)	552	0.190703	0.594582	0	0	5.58607	9.25634	PRNP
Oligodendrocyte Differentiation (GO:0048709)	553	0.190703	0.594582	0	0	5.58607	9.25634	EIF2B1
Peptidyl-Lysine Dimethylation (GO:0018027)	554	0.190703	0.594582	0	0	5.58607	9.25634	EHMT1
Peptidyl-Tyrosine Autophosphorylation (GO:0038083)	555	0.190703	0.594582	0	0	5.58607	9.25634	MAPK3
Positive Regulation Of Glycogen Metabolic Process (GO:0070875)	556	0.190703	0.594582	0	0	5.58607	9.25634	AKT2
Positive Regulation Of Keratinocyte Differentiation (GO:0045618)	557	0.190703	0.594582	0	0	5.58607	9.25634	MED1
Positive Regulation Of Keratinocyte Migration (GO:0051549)	558	0.190703	0.594582	0	0	5.58607	9.25634	ARF6
Positive Regulation Of Leukocyte Proliferation (GO:0070665)	559	0.190703	0.594582	0	0	5.58607	9.25634	MAPK3
Positive Regulation Of Ligase Activity (GO:0051351)	560	0.190703	0.594582	0	0	5.58607	9.25634	MID1IP1
Positive Regulation Of Mitochondrial Outer Membrane Permeabilization Involved In Apoptotic Signaling Pathway (GO:1901030)	561	0.190703	0.594582	0	0	5.58607	9.25634	NMT1
Positive Regulation Of Muscle Cell Differentiation (GO:0051149)	562	0.190703	0.594582	0	0	5.58607	9.25634	RBM4
Positive Regulation Of Vascular Endothelial Growth Factor Receptor Signaling Pathway (GO:0030949)	563	0.190703	0.594582	0	0	5.58607	9.25634	ITGA5
Protein K11-linked Deubiquitination (GO:0035871)	564	0.190703	0.594582	0	0	5.58607	9.25634	VCPIP1
Protein Localization To Nucleolus (GO:1902570)	565	0.190703	0.594582	0	0	5.58607	9.25634	RRP7A
Purine Nucleoside Bisphosphate Catabolic Process (GO:0034034)	566	0.190703	0.594582	0	0	5.58607	9.25634	MLYCD
Pyrimidine-Containing Compound Metabolic Process (GO:0072527)	567	0.190703	0.594582	0	0	5.58607	9.25634	ERH
Regulation Of CD4-positive, Alpha-Beta T Cell Proliferation (GO:2000561)	568	0.190703	0.594582	0	0	5.58607	9.25634	VSIR
Regulation Of Actin Filament Depolymerization (GO:0030834)	569	0.190703	0.594582	0	0	5.58607	9.25634	LIMA1
Regulation Of Calcium Ion Import Across Plasma Membrane (GO:1905664)	570	0.190703	0.594582	0	0	5.58607	9.25634	PRNP
Regulation Of Intracellular Signal Transduction (GO:1902531)	571	0.192691	0.594582	0	0	1.4359	2.36444	MINK1;GNA12;ARAF;PIP5K1B;GRAP;RHOF;ARAP1;VAV1;RELA
Positive Regulation Of Protein Modification By Small Protein Conjugation Or Removal (GO:1903322)	572	0.194806	0.594582	0	0	1.80681	2.9555	TNIP1;MUL1;UBE2L3;CENPS
Regulation Of Macromolecule Biosynthetic Process (GO:0010556)	573	0.194812	0.594582	0	0	2.04776	3.34955	MED1;TCOF1;JADE2
Regulation Of Telomere Maintenance Via Telomerase (GO:0032210)	574	0.194812	0.594582	0	0	2.04776	3.34955	TNIP1;PRKCQ;MAPK3
Intracellular Protein Transport (GO:0006886)	575	0.195118	0.594582	0	0	1.3548	2.21395	ARFRP1;IPO9;STX16;AKT2;XPO6;SEC16A;RAB35;ERP29;HPS4;IPO7;IPO4;ARF6
Positive Regulation Of DNA-binding Transcription Factor Activity (GO:0051091)	576	0.197413	0.594582	0	0	1.51044	2.45062	SRF;CARD9;PRKCQ;RIPK1;NOD1;TCF3;RELA
Regulation Of Chromatin Organization (GO:1902275)	577	0.201322	0.594582	0	0	2.5419	4.07429	MSL2;MSL1
DNA-templated Transcription Elongation (GO:0006354)	578	0.201322	0.594582	0	0	2.5419	4.07429	GTF2F1;SUPT6H
Golgi To Plasma Membrane Protein Transport (GO:0043001)	579	0.201322	0.594582	0	0	2.5419	4.07429	ARFRP1;GOLPH3
Regulation Of Nucleotide-Excision Repair (GO:2000819)	580	0.201322	0.594582	0	0	2.5419	4.07429	SMARCC1;ARID1B
Regulation Of p38MAPK Cascade (GO:1900744)	581	0.201322	0.594582	0	0	2.5419	4.07429	MFHAS1;MINK1
Cellular Response To Hydrogen Peroxide (GO:0070301)	582	0.201322	0.594582	0	0	2.5419	4.07429	RIPK1;RELA
Chordate Embryonic Development (GO:0043009)	583	0.201322	0.594582	0	0	2.5419	4.07429	POLR2D;HINFP
Hexose Biosynthetic Process (GO:0019319)	584	0.201322	0.594582	0	0	2.5419	4.07429	POLR2D;PCK2
Positive Regulation Of Dephosphorylation (GO:0035306)	585	0.201322	0.594582	0	0	2.5419	4.07429	ANKLE2;SPPL3
Small GTPase Mediated Signal Transduction (GO:0007264)	586	0.201965	0.594582	0	0	1.77796	2.84413	NUCB1;KRAS;GRAP;CRKL
Cellular Component Assembly (GO:0022607)	587	0.20228	0.594582	0	0	1.49876	2.39517	LIMA1;VCPIP1;YTHDF1;PARVG;SLC2A1;PEX14;RTN4
Positive Regulation Of Developmental Process (GO:0051094)	588	0.20228	0.594582	0	0	1.49876	2.39517	SMARCC1;SRF;MUL1;KMT5B;C21ORF91;ARID1B;RTN4
Positive Regulation Of Canonical Wnt Signaling Pathway (GO:0090263)	589	0.203768	0.594582	0	0	1.9988	3.17964	USP47;PPM1A;CSNK1G2
Positive Regulation Of Inflammatory Response (GO:0050729)	590	0.203768	0.594582	0	0	1.9988	3.17964	FEM1A;TNIP1;RIPK1
Regulation Of Protein Kinase B Signaling (GO:0051896)	591	0.209202	0.594582	0	0	1.75	2.7378	MFHAS1;MUL1;PIK3CB;RTN4
Protein Complex Oligomerization (GO:0051259)	592	0.209202	0.594582	0	0	1.75	2.7378	CARD9;ZBTB1;LRRC8D;ELAVL1
Regulation Of Protein Secretion (GO:0050708)	593	0.212817	0.594582	0	0	1.95212	3.02056	GOLPH3;ERP29;ARF6
Lipid Transport (GO:0006869)	594	0.212817	0.594582	0	0	1.95212	3.02056	SLC25A17;SCP2;PITPNC1
Nucleocytoplasmic Transport (GO:0006913)	595	0.212817	0.594582	0	0	1.95212	3.02056	CDKN1B;NUP210;RITA1
Positive Regulation Of Telomere Maintenance (GO:0032206)	596	0.212817	0.594582	0	0	1.95212	3.02056	TNIP1;PRKCQ;MAPK3
Positive Regulation Of Transcription Initiation By RNA Polymerase II (GO:0060261)	597	0.212817	0.594582	0	0	1.95212	3.02056	MED1;SRF;MED16
Regulation Of Signal Transduction (GO:0009966)	598	0.214098	0.594582	0	0	1.52881	2.35639	PRNP;NCOA5;USP20;AMFR;GRK6;CDK13
Regulation Of Filopodium Assembly (GO:0051489)	599	0.214134	0.594582	0	0	2.43114	3.74676	ARAP1;ARF6
Canonical Wnt Signaling Pathway (GO:0060070)	600	0.214134	0.594582	0	0	2.43114	3.74676	FRAT2;TCF7
Negative Regulation Of Mitotic Cell Cycle (GO:0045930)	601	0.214134	0.594582	0	0	2.43114	3.74676	CDKN1B;NME6
Negative Regulation Of Protein Kinase B Signaling (GO:0051898)	602	0.214134	0.594582	0	0	2.43114	3.74676	MUL1;PIK3CB
Pattern Recognition Receptor Signaling Pathway (GO:0002221)	603	0.214134	0.594582	0	0	2.43114	3.74676	MAPKAPK2;NOD1
Positive Regulation Of Protein Targeting To Mitochondrion (GO:1903955)	604	0.214134	0.594582	0	0	2.43114	3.74676	HPS4;UBE2L3
Vesicle Organization (GO:0016050)	605	0.216511	0.594582	0	0	1.7229	2.63624	STX16;TRAPPC10;TRAPPC9;CHMP7
Regulation Of Chromosome Condensation (GO:0060623)	606	0.218755	0.594582	0	0	4.6546	7.07408	NCAPH2
N-acetylglucosamine Metabolic Process (GO:0006044)	607	0.218755	0.594582	0	0	4.6546	7.07408	GNPDA2
NAD Biosynthetic Process (GO:0009435)	608	0.218755	0.594582	0	0	4.6546	7.07408	PARP10
Regulation Of Granulocyte Chemotaxis (GO:0071622)	609	0.218755	0.594582	0	0	4.6546	7.07408	MAPK3
Regulation Of Histone Methylation (GO:0031060)	610	0.218755	0.594582	0	0	4.6546	7.07408	EHMT1
SREBP Signaling Pathway (GO:0032933)	611	0.218755	0.594582	0	0	4.6546	7.07408	INSIG2
U4 snRNA 3'-End Processing (GO:0034475)	612	0.218755	0.594582	0	0	4.6546	7.07408	EXOSC6
UDP-N-acetylglucosamine Biosynthetic Process (GO:0006048)	613	0.218755	0.594582	0	0	4.6546	7.07408	GNPDA2
Regulation Of Leukocyte Adhesion To Vascular Endothelial Cell (GO:1904994)	614	0.218755	0.594582	0	0	4.6546	7.07408	RELA
Adenylate Cyclase-Inhibiting G Protein-Coupled Receptor Signaling Pathway (GO:0007193)	615	0.218755	0.594582	0	0	4.6546	7.07408	ADCY7
Regulation Of Macrophage Chemotaxis (GO:0010758)	616	0.218755	0.594582	0	0	4.6546	7.07408	MAPK3
Regulation Of miRNA Metabolic Process (GO:2000628)	617	0.218755	0.594582	0	0	4.6546	7.07408	RELA
Blood Vessel Endothelial Cell Migration (GO:0043534)	618	0.218755	0.594582	0	0	4.6546	7.07408	SRF
Cellular Response To Copper Ion (GO:0071280)	619	0.218755	0.594582	0	0	4.6546	7.07408	PRNP
Cellular Response To Fluid Shear Stress (GO:0071498)	620	0.218755	0.594582	0	0	4.6546	7.07408	KLF2
Regulation Of Stress-Activated Protein Kinase Signaling Cascade (GO:0070302)	621	0.218755	0.594582	0	0	4.6546	7.07408	MAPK3
Regulation Of Toll-Like Receptor 9 Signaling Pathway (GO:0034163)	622	0.218755	0.594582	0	0	4.6546	7.07408	RTN4
Regulation Of Trans-Synaptic Signaling (GO:0099177)	623	0.218755	0.594582	0	0	4.6546	7.07408	EIF4EBP2
Cellular Response To Muramyl Dipeptide (GO:0071225)	624	0.218755	0.594582	0	0	4.6546	7.07408	NOD1
Cellular Response To Sterol Depletion (GO:0071501)	625	0.218755	0.594582	0	0	4.6546	7.07408	INSIG2
Serine Family Amino Acid Metabolic Process (GO:0009069)	626	0.218755	0.594582	0	0	4.6546	7.07408	SEPHS2
Endonucleolytic Cleavage In ITS1 To Separate SSU-rRNA From 5.8S rRNA And LSU-rRNA From Tricistronic rRNA Transcript (SSU-rRNA, 5.8S rRNA, LSU-rRNA) (GO:0000447)	627	0.218755	0.594582	0	0	4.6546	7.07408	KRI1
Small Nucleolar Ribonucleoprotein Complex Assembly (GO:0000491)	628	0.218755	0.594582	0	0	4.6546	7.07408	TNIP1
sno(s)RNA 3'-End Processing (GO:0031126)	629	0.218755	0.594582	0	0	4.6546	7.07408	EXOSC6
Somatic Hypermutation Of Immunoglobulin Genes (GO:0016446)	630	0.218755	0.594582	0	0	4.6546	7.07408	MCM3AP
Sphingosine-1-Phosphate Receptor Signaling Pathway (GO:0003376)	631	0.218755	0.594582	0	0	4.6546	7.07408	PIK3CB
succinyl-CoA Metabolic Process (GO:0006104)	632	0.218755	0.594582	0	0	4.6546	7.07408	DLST
Fatty Acid Beta-Oxidation Using acyl-CoA Oxidase (GO:0033540)	633	0.218755	0.594582	0	0	4.6546	7.07408	SCP2
tRNA Transcription By RNA Polymerase III (GO:0042797)	634	0.218755	0.594582	0	0	4.6546	7.07408	GTF3C2
Glucose Import (GO:0046323)	635	0.218755	0.594582	0	0	4.6546	7.07408	SLC2A1
Glucose Transmembrane Transport (GO:1904659)	636	0.218755	0.594582	0	0	4.6546	7.07408	SLC2A1
Tricarboxylic Acid Metabolic Process (GO:0072350)	637	0.218755	0.594582	0	0	4.6546	7.07408	GLUD1
Glutamine Family Amino Acid Biosynthetic Process (GO:0009084)	638	0.218755	0.594582	0	0	4.6546	7.07408	GLUD1
Ubiquitin-Dependent Protein Catabolic Process Via The C-end Degron Rule Pathway (GO:0140627)	639	0.218755	0.594582	0	0	4.6546	7.07408	FEM1A
Isoprenoid Biosynthetic Process (GO:0008299)	640	0.218755	0.594582	0	0	4.6546	7.07408	IDI1
Leukotriene Metabolic Process (GO:0006691)	641	0.218755	0.594582	0	0	4.6546	7.07408	MAPKAPK2
Long-Chain Fatty Acid Import Into Cell (GO:0044539)	642	0.218755	0.594582	0	0	4.6546	7.07408	SLC2A1
Macromolecule Depalmitoylation (GO:0098734)	643	0.218755	0.594582	0	0	4.6546	7.07408	ABHD17B
Megakaryocyte Differentiation (GO:0030219)	644	0.218755	0.594582	0	0	4.6546	7.07408	MED1
Mitochondrial tRNA Modification (GO:0070900)	645	0.218755	0.594582	0	0	4.6546	7.07408	TRMT10C
Mitotic DNA Replication Checkpoint Signaling (GO:0033314)	646	0.218755	0.594582	0	0	4.6546	7.07408	ZNF830
Necroptotic Process (GO:0070266)	647	0.218755	0.594582	0	0	4.6546	7.07408	RIPK1
Negative Regulation Of Chemokine Production (GO:0032682)	648	0.218755	0.594582	0	0	4.6546	7.07408	MUL1
Negative Regulation Of Hippo Signaling (GO:0035331)	649	0.218755	0.594582	0	0	4.6546	7.07408	MAP2K3
Negative Regulation Of Mitotic Nuclear Division (GO:0045839)	650	0.218755	0.594582	0	0	4.6546	7.07408	NME6
Negative Regulation Of Nuclear Division (GO:0051784)	651	0.218755	0.594582	0	0	4.6546	7.07408	NME6
Negative Regulation Of Transmembrane Transport (GO:0034763)	652	0.218755	0.594582	0	0	4.6546	7.07408	AKT2
Neuron Projection Maintenance (GO:1990535)	653	0.218755	0.594582	0	0	4.6546	7.07408	PRNP
Nuclear Membrane Disassembly (GO:0051081)	654	0.218755	0.594582	0	0	4.6546	7.07408	CTDNEP1
Nuclear-Transcribed mRNA Catabolic Process, Exonucleolytic, 3'-5' (GO:0034427)	655	0.218755	0.594582	0	0	4.6546	7.07408	EXOSC6
Nucleotide-Binding Oligomerization Domain Containing Signaling Pathway (GO:0070423)	656	0.218755	0.594582	0	0	4.6546	7.07408	RELA
Oligodendrocyte Development (GO:0014003)	657	0.218755	0.594582	0	0	4.6546	7.07408	EIF2B1
Peptidyl-Serine Autophosphorylation (GO:0036289)	658	0.218755	0.594582	0	0	4.6546	7.07408	RIPK1
Pinocytosis (GO:0006907)	659	0.218755	0.594582	0	0	4.6546	7.07408	MAPKAPK2
Plasma Membrane To Endosome Transport (GO:0048227)	660	0.218755	0.594582	0	0	4.6546	7.07408	RAB35
Positive Regulation Of Chromosome Condensation (GO:1905821)	661	0.218755	0.594582	0	0	4.6546	7.07408	NCAPH2
Positive Regulation Of Cyclase Activity (GO:0031281)	662	0.218755	0.594582	0	0	4.6546	7.07408	MAPK3
Positive Regulation Of Macrophage Differentiation (GO:0045651)	663	0.218755	0.594582	0	0	4.6546	7.07408	RIPK1
Positive Regulation Of Nitric Oxide Biosynthetic Process (GO:0045429)	664	0.218755	0.594582	0	0	4.6546	7.07408	KLF2
Positive Regulation Of Nitric Oxide Metabolic Process (GO:1904407)	665	0.218755	0.594582	0	0	4.6546	7.07408	KLF2
Positive Regulation Of Receptor Internalization (GO:0002092)	666	0.218755	0.594582	0	0	4.6546	7.07408	TBC1D5
Prostaglandin Biosynthetic Process (GO:0001516)	667	0.218755	0.594582	0	0	4.6546	7.07408	PNPLA8
Protein Depalmitoylation (GO:0002084)	668	0.218755	0.594582	0	0	4.6546	7.07408	ABHD17B
Protein Desumoylation (GO:0016926)	669	0.218755	0.594582	0	0	4.6546	7.07408	SENP7
Protein Localization To Cytoplasmic Stress Granule (GO:1903608)	670	0.218755	0.594582	0	0	4.6546	7.07408	TIA1
Protein Localization To Synapse (GO:0035418)	671	0.218755	0.594582	0	0	4.6546	7.07408	ILF3
Protein poly-ADP-ribosylation (GO:0070212)	672	0.218755	0.594582	0	0	4.6546	7.07408	PARP10
rRNA Base Methylation (GO:0070475)	673	0.218755	0.594582	0	0	4.6546	7.07408	FDXACB1
Regulation Of ER-associated Ubiquitin-Dependent Protein Catabolic Process (GO:1903069)	674	0.218755	0.594582	0	0	4.6546	7.07408	UBQLN2
Regulation Of Amyloid-Beta Clearance (GO:1900221)	675	0.218755	0.594582	0	0	4.6546	7.07408	SRF
Regulation Of cAMP-mediated Signaling (GO:0043949)	676	0.218755	0.594582	0	0	4.6546	7.07408	PDE3B
rRNA Processing (GO:0006364)	677	0.220101	0.594582	0	0	1.59155	2.40908	RRP7A;DDX27;DKC1;SPPL2B;TSR3
Regulation Of Nucleic Acid-Templated Transcription (GO:1903506)	678	0.220448	0.594582	0	0	1.30004	1.96578	ESRRA;ZNF263;ZNF195;TCF7;ZNF22;JADE2;RELA;HINFP;NFKB2;UBE2L3;PRKCQ;TCF3;SLC2A4RG
Autophagosome Organization (GO:1905037)	679	0.22195	0.594582	0	0	1.90756	2.87146	ATG16L2;RAB35;UBQLN2
Negative Regulation Of Protein Binding (GO:0032091)	680	0.22195	0.594582	0	0	1.90756	2.87146	DNAJB2;GTF2F1;PEX14
Positive Regulation Of DNA-templated Transcription Initiation (GO:2000144)	681	0.22195	0.594582	0	0	1.90756	2.87146	MED1;SRF;MED16
Regulation Of Small GTPase Mediated Signal Transduction (GO:0051056)	682	0.223889	0.594582	0	0	1.69663	2.53918	ARAP1;RHOF;ARHGAP25;VAV1
Regulation Of Centrosome Duplication (GO:0010824)	683	0.227019	0.594582	0	0	2.32961	3.45416	FBXW5;CEP295
Transcription Elongation By RNA Polymerase II (GO:0006368)	684	0.227019	0.594582	0	0	2.32961	3.45416	GTF2F1;SUPT6H
Vesicle Coating (GO:0006901)	685	0.227019	0.594582	0	0	2.32961	3.45416	TRAPPC10;TRAPPC9
Lytic Vacuole Organization (GO:0080171)	686	0.227019	0.594582	0	0	2.32961	3.45416	HPS4;PI4KB
mRNA Modification (GO:0016556)	687	0.227019	0.594582	0	0	2.32961	3.45416	TRMT10C;DKC1
Positive Regulation Of ATP-dependent Activity (GO:0032781)	688	0.227019	0.594582	0	0	2.32961	3.45416	DNAJB2;CHTOP
Positive Regulation Of Myoblast Differentiation (GO:0045663)	689	0.227019	0.594582	0	0	2.32961	3.45416	SMARCC1;ARID1B
Signal Transduction In Response To DNA Damage (GO:0042770)	690	0.231161	0.594582	0	0	1.86499	2.73154	NDRG1;MAPK3;HINFP
Organelle Disassembly (GO:1903008)	691	0.231161	0.594582	0	0	1.86499	2.73154	RRP7A;DENR;RETREG1
Actin Filament Organization (GO:0007015)	692	0.231332	0.594582	0	0	1.67114	2.44638	ACTN1;ELMO2;RHOF;ARHGAP25
Negative Regulation Of Programmed Cell Death (GO:0043069)	693	0.234099	0.594582	0	0	1.31399	1.90793	MED1;USP47;ANKLE2;GOLPH3;AKT2;ARAF;BCL2;RIPK1;TAF9B;ZNF830;RELA
Positive Regulation Of Double-Strand Break Repair (GO:2000781)	694	0.238835	0.594582	0	0	1.6464	2.35761	SMARCC1;MORF4L2;KMT5B;ARID1B
TOR Signaling (GO:0031929)	695	0.239957	0.594582	0	0	2.2362	3.19172	RPTOR;EIF4EBP2
Glycolipid Biosynthetic Process (GO:0009247)	696	0.239957	0.594582	0	0	2.2362	3.19172	SLC30A5;ST3GAL5
Maturation Of SSU-rRNA From Tricistronic rRNA Transcript (SSU-rRNA, 5.8S rRNA, LSU-rRNA) (GO:0000462)	697	0.239957	0.594582	0	0	2.2362	3.19172	UTP3;KRI1
Positive Regulation Of miRNA Metabolic Process (GO:2000630)	698	0.239957	0.594582	0	0	2.2362	3.19172	SRF;RELA
Protein K11-linked Ubiquitination (GO:0070979)	699	0.239957	0.594582	0	0	2.2362	3.19172	UBE2E3;UBE2L3
Regulation Of G0 To G1 Transition (GO:0070316)	700	0.239957	0.594582	0	0	2.2362	3.19172	SMARCC1;ARID1B
Skeletal System Development (GO:0001501)	701	0.24044	0.594582	0	0	1.82426	2.60009	TCOF1;POLR2D;GNAS
post-Golgi Vesicle-Mediated Transport (GO:0006892)	702	0.24044	0.594582	0	0	1.82426	2.60009	SEC16A;CCDC22;SCAMP2
Regulation Of NIK/NF-kappaB Signaling (GO:1901222)	703	0.24044	0.594582	0	0	1.82426	2.60009	PPM1A;NOD1;RELA
ATP Transport (GO:0015867)	704	0.245837	0.594582	0	0	3.98926	5.59727	SLC25A17
Regulation Of Cytoplasmic Transport (GO:1903649)	705	0.245837	0.594582	0	0	3.98926	5.59727	MAPK3
Golgi Ribbon Formation (GO:0090161)	706	0.245837	0.594582	0	0	3.98926	5.59727	GOLPH3
N-acetylneuraminate Metabolic Process (GO:0006054)	707	0.245837	0.594582	0	0	3.98926	5.59727	GNPDA2
Regulation Of Hemopoiesis (GO:1903706)	708	0.245837	0.594582	0	0	3.98926	5.59727	PURB
UDP-N-acetylglucosamine Metabolic Process (GO:0006047)	709	0.245837	0.594582	0	0	3.98926	5.59727	GNPDA2
Regulation Of Long-Term Synaptic Potentiation (GO:1900271)	710	0.245837	0.594582	0	0	3.98926	5.59727	YTHDF1
Regulation Of Macrophage Differentiation (GO:0045649)	711	0.245837	0.594582	0	0	3.98926	5.59727	RIPK1
Amino Sugar Biosynthetic Process (GO:0046349)	712	0.245837	0.594582	0	0	3.98926	5.59727	GNPDA2
Regulation Of Mitochondrial Fusion (GO:0010635)	713	0.245837	0.594582	0	0	3.98926	5.59727	MUL1
Regulation Of Phospholipid Metabolic Process (GO:1903725)	714	0.245837	0.594582	0	0	3.98926	5.59727	MTMR3
Calcium-Mediated Signaling Using Intracellular Calcium Source (GO:0035584)	715	0.245837	0.594582	0	0	3.98926	5.59727	PRNP
Regulation Of Protein Acetylation (GO:1901983)	716	0.245837	0.594582	0	0	3.98926	5.59727	CEP295
Regulation Of Protein Localization To Chromatin (GO:1905634)	717	0.245837	0.594582	0	0	3.98926	5.59727	VCPIP1
Cardiac Ventricle Development (GO:0003231)	718	0.245837	0.594582	0	0	3.98926	5.59727	HECTD1
Cardiolipin Metabolic Process (GO:0032048)	719	0.245837	0.594582	0	0	3.98926	5.59727	PNPLA8
Regulation Of Retinoic Acid Receptor Signaling Pathway (GO:0048385)	720	0.245837	0.594582	0	0	3.98926	5.59727	KLF2
Cellular Component Maintenance (GO:0043954)	721	0.245837	0.594582	0	0	3.98926	5.59727	PRNP
Regulation Of Smooth Muscle Contraction (GO:0006940)	722	0.245837	0.594582	0	0	3.98926	5.59727	SRF
Cellular Response To Exogenous dsRNA (GO:0071360)	723	0.245837	0.594582	0	0	3.98926	5.59727	MUL1
Cellular Response To Interleukin-15 (GO:0071350)	724	0.245837	0.594582	0	0	3.98926	5.59727	JAK1
Cellular Response To Sterol (GO:0036315)	725	0.245837	0.594582	0	0	3.98926	5.59727	INSIG2
Cellular Response To Thyroid Hormone Stimulus (GO:0097067)	726	0.245837	0.594582	0	0	3.98926	5.59727	MED1
Central Nervous System Neuron Differentiation (GO:0021953)	727	0.245837	0.594582	0	0	3.98926	5.59727	C21ORF91
Respiratory System Development (GO:0060541)	728	0.245837	0.594582	0	0	3.98926	5.59727	POLR2D
Respiratory Tube Development (GO:0030323)	729	0.245837	0.594582	0	0	3.98926	5.59727	POLR2D
Response To Copper Ion (GO:0046688)	730	0.245837	0.594582	0	0	3.98926	5.59727	PRNP
Response To Laminar Fluid Shear Stress (GO:0034616)	731	0.245837	0.594582	0	0	3.98926	5.59727	KLF2
Response To Nerve Growth Factor (GO:1990089)	732	0.245837	0.594582	0	0	3.98926	5.59727	RAB35
Response To Thyroid Hormone (GO:0097066)	733	0.245837	0.594582	0	0	3.98926	5.59727	MED1
Embryo Development Ending In Birth Or Egg Hatching (GO:0009792)	734	0.245837	0.594582	0	0	3.98926	5.59727	USP22
Somatic Recombination Of Immunoglobulin Gene Segments (GO:0016447)	735	0.245837	0.594582	0	0	3.98926	5.59727	TCF3
Error-Prone Translesion Synthesis (GO:0042276)	736	0.245837	0.594582	0	0	3.98926	5.59727	REV1
tRNA Threonylcarbamoyladenosine Metabolic Process (GO:0070525)	737	0.245837	0.594582	0	0	3.98926	5.59727	YRDC
tRNA Transcription (GO:0009304)	738	0.245837	0.594582	0	0	3.98926	5.59727	GTF3C2
Type II Interferon-Mediated Signaling Pathway (GO:0060333)	739	0.245837	0.594582	0	0	3.98926	5.59727	JAK1
Glycoprotein Catabolic Process (GO:0006516)	740	0.245837	0.594582	0	0	3.98926	5.59727	STT3B
Glycosphingolipid Biosynthetic Process (GO:0006688)	741	0.245837	0.594582	0	0	3.98926	5.59727	ST3GAL5
Vesicle Fusion With Vacuole (GO:0051469)	742	0.245837	0.594582	0	0	3.98926	5.59727	CHMP7
Immunoglobulin Mediated Immune Response (GO:0016064)	743	0.245837	0.594582	0	0	3.98926	5.59727	CARD9
Interleukin-15-Mediated Signaling Pathway (GO:0035723)	744	0.245837	0.594582	0	0	3.98926	5.59727	JAK1
Keratan Sulfate Biosynthetic Process (GO:0018146)	745	0.245837	0.594582	0	0	3.98926	5.59727	B4GAT1
Lipoprotein Catabolic Process (GO:0042159)	746	0.245837	0.594582	0	0	3.98926	5.59727	ABHD17B
Maintenance Of Protein Localization In Endoplasmic Reticulum (GO:0035437)	747	0.245837	0.594582	0	0	3.98926	5.59727	INSIG2
Multivesicular Body-Lysosome Fusion (GO:0061763)	748	0.245837	0.594582	0	0	3.98926	5.59727	CHMP7
Myotube Differentiation (GO:0014902)	749	0.245837	0.594582	0	0	3.98926	5.59727	PLD3
Negative Regulation Of Epidermal Growth Factor-Activated Receptor Activity (GO:0007175)	750	0.245837	0.594582	0	0	3.98926	5.59727	ZGPAT
Negative Regulation Of Extrinsic Apoptotic Signaling Pathway In Absence Of Ligand (GO:2001240)	751	0.245837	0.594582	0	0	3.98926	5.59727	BCL2
Negative Regulation Of Necroptotic Process (GO:0060546)	752	0.245837	0.594582	0	0	3.98926	5.59727	RIPK1
Negative Regulation Of Programmed Necrotic Cell Death (GO:0062099)	753	0.245837	0.594582	0	0	3.98926	5.59727	RIPK1
Negative Regulation Of Signal Transduction In Absence Of Ligand (GO:1901099)	754	0.245837	0.594582	0	0	3.98926	5.59727	BCL2
Neutrophil Mediated Immunity (GO:0002446)	755	0.245837	0.594582	0	0	3.98926	5.59727	CARD9
p38MAPK Cascade (GO:0038066)	756	0.245837	0.594582	0	0	3.98926	5.59727	MAP2K3
Peptidyl-Lysine Monomethylation (GO:0018026)	757	0.245837	0.594582	0	0	3.98926	5.59727	EHMT1
Positive Regulation Of CD4-positive, Alpha-Beta T Cell Activation (GO:2000516)	758	0.245837	0.594582	0	0	3.98926	5.59727	PRKCQ
Positive Regulation Of T-helper 17 Type Immune Response (GO:2000318)	759	0.245837	0.594582	0	0	3.98926	5.59727	PRKCQ
Positive Regulation Of Calcium Ion Transport (GO:0051928)	760	0.245837	0.594582	0	0	3.98926	5.59727	STIM2
Positive Regulation Of Centriole Replication (GO:0046601)	761	0.245837	0.594582	0	0	3.98926	5.59727	CEP295
Positive Regulation Of Epidermal Cell Differentiation (GO:0045606)	762	0.245837	0.594582	0	0	3.98926	5.59727	MED1
Positive Regulation Of Fatty Acid Biosynthetic Process (GO:0045723)	763	0.245837	0.594582	0	0	3.98926	5.59727	MID1IP1
Positive Regulation Of Glycolytic Process (GO:0045821)	764	0.245837	0.594582	0	0	3.98926	5.59727	RPTOR
Positive Regulation Of Natural Killer Cell Activation (GO:0032816)	765	0.245837	0.594582	0	0	3.98926	5.59727	ZBTB1
Positive Regulation Of Nitric-Oxide Synthase Activity (GO:0051000)	766	0.245837	0.594582	0	0	3.98926	5.59727	PIK3CB
Positive Regulation Of Protein Acetylation (GO:1901985)	767	0.245837	0.594582	0	0	3.98926	5.59727	CEP295
Positive Regulation Of Protein Sumoylation (GO:0033235)	768	0.245837	0.594582	0	0	3.98926	5.59727	MUL1
Positive Regulation Of Regulatory T Cell Differentiation (GO:0045591)	769	0.245837	0.594582	0	0	3.98926	5.59727	VSIR
Protein Hexamerization (GO:0034214)	770	0.245837	0.594582	0	0	3.98926	5.59727	LRRC8D
Protein Homotrimerization (GO:0070207)	771	0.245837	0.594582	0	0	3.98926	5.59727	SIGMAR1
Protein Localization To Cell-Cell Junction (GO:0150105)	772	0.245837	0.594582	0	0	3.98926	5.59727	JAK1
Protein Localization To Nuclear Envelope (GO:0090435)	773	0.245837	0.594582	0	0	3.98926	5.59727	TMEM147
Protein Trimerization (GO:0070206)	774	0.245837	0.594582	0	0	3.98926	5.59727	SIGMAR1
Regulation Of RNA Metabolic Process (GO:0051252)	775	0.246395	0.595085	0	0	1.62237	2.27266	MED1;USP22;PCBP2;MCM2
Positive Regulation Of GTPase Activity (GO:0043547)	776	0.248093	0.595085	0	0	1.44886	2.01964	TBC1D1;TBC1D5;SGSM2;ARAP1;ARHGAP25;TBC1D10B
Regulation Of Transcription Initiation By RNA Polymerase II (GO:0060260)	777	0.24978	0.595085	0	0	1.78527	2.47648	MED1;SRF;MED16
Negative Regulation Of Protein Serine/Threonine Kinase Activity (GO:0071901)	778	0.24978	0.595085	0	0	1.78527	2.47648	CDKN1B;PIK3CB;IPO7
Cytosolic Transport (GO:0016482)	779	0.252282	0.595085	0	0	1.50522	2.07301	ARFRP1;TBC1D5;STX16;BET1L;TBC1D10B
Positive Regulation Of Intracellular Protein Transport (GO:0090316)	780	0.252282	0.595085	0	0	1.50522	2.07301	PRNP;AKT2;HPS4;NMT1;UBE2L3
Regulation Of Metaphase/Anaphase Transition Of Cell Cycle (GO:1902099)	781	0.252929	0.595085	0	0	2.14998	2.95546	SMARCC1;ARID1B
Regulation Of Ubiquitin-Protein Transferase Activity (GO:0051438)	782	0.252929	0.595085	0	0	2.14998	2.95546	FEM1A;UBE2L3
Intracellular Glucose Homeostasis (GO:0001678)	783	0.252929	0.595085	0	0	2.14998	2.95546	LRRC8D;PCK2
Negative Regulation Of Cellular Metabolic Process (GO:0031324)	784	0.252929	0.595085	0	0	2.14998	2.95546	BCKDK;MAP3K3
Regulation Of T Cell Receptor Signaling Pathway (GO:0050856)	785	0.252929	0.595085	0	0	2.14998	2.95546	PRNP;RELA
Regulation Of Autophagosome Assembly (GO:2000785)	786	0.252929	0.595085	0	0	2.14998	2.95546	MTMR3;UBQLN2
Ribosomal Small Subunit Biogenesis (GO:0042274)	787	0.254006	0.595085	0	0	1.59904	2.19132	RRP7A;UTP3;SPPL2B;TSR3
Positive Regulation Of Macromolecule Biosynthetic Process (GO:0010557)	788	0.254006	0.595085	0	0	1.59904	2.19132	YTHDF1;POLDIP3;AKT2;ELAVL1
Autophagosome Assembly (GO:0000045)	789	0.259173	0.595085	0	0	1.7479	2.36012	ATG16L2;RAB35;UBQLN2
Monocarboxylic Acid Metabolic Process (GO:0032787)	790	0.259173	0.595085	0	0	1.7479	2.36012	SCP2;PNPLA8;AASDHPPT
Negative Regulation Of NF-kappaB Transcription Factor Activity (GO:0032088)	791	0.259173	0.595085	0	0	1.7479	2.36012	PARP10;ERBIN;CCDC22
Regulation Of Cellular Biosynthetic Process (GO:0031326)	792	0.259173	0.595085	0	0	1.7479	2.36012	MED1;TCOF1;JADE2
Protein Deubiquitination (GO:0016579)	793	0.261665	0.595085	0	0	1.57636	2.11341	VCPIP1;USP47;USP20;USP22
Positive Regulation Of Cellular Catabolic Process (GO:0031331)	794	0.265474	0.595085	0	0	1.47324	1.95387	RPTOR;USP20;AKT2;PIK3CB;GTPBP1
DNA Damage Checkpoint Signaling (GO:0000077)	795	0.265916	0.595085	0	0	2.07014	2.74206	ZNF830;HINFP
DNA Damage Response, Signal Transduction By P53 Class Mediator (GO:0030330)	796	0.265916	0.595085	0	0	2.07014	2.74206	CDKN1B;NDRG1
Actin Cytoskeleton Reorganization (GO:0031532)	797	0.265916	0.595085	0	0	2.07014	2.74206	PARVG;MINK1
Antiviral Innate Immune Response (GO:0140374)	798	0.265916	0.595085	0	0	2.07014	2.74206	SENP7;USP20
Regulation Of Protein Targeting To Mitochondrion (GO:1903214)	799	0.265916	0.595085	0	0	2.07014	2.74206	HPS4;UBE2L3
Cellular Response To Peptide (GO:1901653)	800	0.265916	0.595085	0	0	2.07014	2.74206	PRNP;NOD1
Response To Glucose (GO:0009749)	801	0.265916	0.595085	0	0	2.07014	2.74206	EIF2B1;PCK2
Response To Molecule Of Bacterial Origin (GO:0002237)	802	0.265916	0.595085	0	0	2.07014	2.74206	MAPKAPK2;ERBIN
Tumor Necrosis Factor-Mediated Signaling Pathway (GO:0033209)	803	0.265916	0.595085	0	0	2.07014	2.74206	RIPK1;RELA
Positive Regulation Of B Cell Activation (GO:0050871)	804	0.265916	0.595085	0	0	2.07014	2.74206	BCL2;KMT5B
Protein Destabilization (GO:0031648)	805	0.265916	0.595085	0	0	2.07014	2.74206	PRNP;MUL1
Regulation Of Transcription By RNA Polymerase II (GO:0006357)	806	0.267433	0.595085	0	0	1.12033	1.47758	ZNF254;ZNF496;AKNA;SATB1;CHD8;SRF;ZMYND8;TCF7;ZBTB1;EHMT1;UBP1;JADE2;MED16;RELA;PURB;MTA1;RIPK1;TAF9B;MAPK3;ZNF266;ESRRA;MED1;SMARCC1;ZNF263;ZGPAT;NCOA5;USP22;ARID5A;PTOV1;RITA1;IRF2BP2;GTF2F1;ARID1B;USF2;KLF2;HINFP;NFKB2;FAM220A;PPM1A;TNIP1;TCF3;CDK13;SLC2A4RG;MCM2
Protein Homooligomerization (GO:0051260)	807	0.269368	0.595085	0	0	1.55431	2.03875	SIGMAR1;CARD9;ZBTB1;ELAVL1
DNA Deamination (GO:0045006)	808	0.271983	0.595085	0	0	3.49025	4.54437	EXOSC6
ESCRT III Complex Disassembly (GO:1904903)	809	0.271983	0.595085	0	0	3.49025	4.54437	CHMP7
ESCRT Complex Disassembly (GO:1904896)	810	0.271983	0.595085	0	0	3.49025	4.54437	CHMP7
Regulation Of Endosome Size (GO:0051036)	811	0.271983	0.595085	0	0	3.49025	4.54437	BORCS6
Golgi Inheritance (GO:0048313)	812	0.271983	0.595085	0	0	3.49025	4.54437	VCPIP1
Regulation Of Leukocyte Activation (GO:0002694)	813	0.271983	0.595085	0	0	3.49025	4.54437	MFHAS1
Regulation Of Lipid Catabolic Process (GO:0050994)	814	0.271983	0.595085	0	0	3.49025	4.54437	PDE3B
Regulation Of Lymphocyte Migration (GO:2000401)	815	0.271983	0.595085	0	0	3.49025	4.54437	STK10
Regulation Of Mitochondrial Outer Membrane Permeabilization Involved In Apoptotic Signaling Pathway (GO:1901028)	816	0.271983	0.595085	0	0	3.49025	4.54437	MUL1
Artery Development (GO:0060840)	817	0.271983	0.595085	0	0	3.49025	4.54437	HECTD1
Regulation Of Protein K63-linked Ubiquitination (GO:1900044)	818	0.271983	0.595085	0	0	3.49025	4.54437	PARP10
Cellular Response To Corticosteroid Stimulus (GO:0071384)	819	0.271983	0.595085	0	0	3.49025	4.54437	UBE2L3
Cellular Response To Estrogen Stimulus (GO:0071391)	820	0.271983	0.595085	0	0	3.49025	4.54437	ARID5A
Cellular Response To Leucine (GO:0071233)	821	0.271983	0.595085	0	0	3.49025	4.54437	RPTOR
Cellular Response To Nerve Growth Factor Stimulus (GO:1990090)	822	0.271983	0.595085	0	0	3.49025	4.54437	RAB35
Response To UV-B (GO:0010224)	823	0.271983	0.595085	0	0	3.49025	4.54437	RELA
Response To Leucine (GO:0043201)	824	0.271983	0.595085	0	0	3.49025	4.54437	RPTOR
Dicarboxylic Acid Catabolic Process (GO:0043649)	825	0.271983	0.595085	0	0	3.49025	4.54437	GLUD1
Erythrocyte Development (GO:0048821)	826	0.271983	0.595085	0	0	3.49025	4.54437	MED1
Stem Cell Development (GO:0048864)	827	0.271983	0.595085	0	0	3.49025	4.54437	TCOF1
Striated Muscle Cell Differentiation (GO:0051146)	828	0.271983	0.595085	0	0	3.49025	4.54437	PLD3
Synaptic Vesicle Membrane Organization (GO:0048499)	829	0.271983	0.595085	0	0	3.49025	4.54437	SYNGR2
tRNA Splicing, Via Endonucleolytic Cleavage And Ligation (GO:0006388)	830	0.271983	0.595085	0	0	3.49025	4.54437	TSEN54
Ganglioside Biosynthetic Process (GO:0001574)	831	0.271983	0.595085	0	0	3.49025	4.54437	ST3GAL5
Vacuole Fusion (GO:0097576)	832	0.271983	0.595085	0	0	3.49025	4.54437	CHMP7
Heart Trabecula Morphogenesis (GO:0061384)	833	0.271983	0.595085	0	0	3.49025	4.54437	POLR2D
Interleukin-6-Mediated Signaling Pathway (GO:0070102)	834	0.271983	0.595085	0	0	3.49025	4.54437	JAK1
Microtubule Anchoring (GO:0034453)	835	0.271983	0.595085	0	0	3.49025	4.54437	PEX14
Mitochondrial RNA Processing (GO:0000963)	836	0.271983	0.595085	0	0	3.49025	4.54437	TRMT10C
Mitochondrial Ribosome Assembly (GO:0061668)	837	0.271983	0.595085	0	0	3.49025	4.54437	DHX30
Negative Regulation Of calcineurin-NFAT Signaling Cascade (GO:0070885)	838	0.271983	0.595085	0	0	3.49025	4.54437	PRNP
Negative Regulation Of Calcineurin-Mediated Signaling (GO:0106057)	839	0.271983	0.595085	0	0	3.49025	4.54437	PRNP
Negative Regulation Of Stem Cell Differentiation (GO:2000737)	840	0.271983	0.595085	0	0	3.49025	4.54437	NELFB
Neuropeptide Signaling Pathway (GO:0007218)	841	0.271983	0.595085	0	0	3.49025	4.54437	RELA
Nitric Oxide Biosynthetic Process (GO:0006809)	842	0.271983	0.595085	0	0	3.49025	4.54437	GCHFR
Nitric Oxide Metabolic Process (GO:0046209)	843	0.271983	0.595085	0	0	3.49025	4.54437	GCHFR
Nuclear mRNA Surveillance (GO:0071028)	844	0.271983	0.595085	0	0	3.49025	4.54437	EXOSC6
Positive Regulation Of Amyloid-Beta Formation (GO:1902004)	845	0.271983	0.595085	0	0	3.49025	4.54437	RELA
Positive Regulation Of Establishment Of Protein Localization To Telomere (GO:1904851)	846	0.271983	0.595085	0	0	3.49025	4.54437	DKC1
Positive Regulation Of Homotypic Cell-Cell Adhesion (GO:0034112)	847	0.271983	0.595085	0	0	3.49025	4.54437	JAK1
Positive Regulation Of Transcription From RNA Polymerase II Promoter Involved In Cellular Response To Chemical Stimulus (GO:1901522)	848	0.271983	0.595085	0	0	3.49025	4.54437	RELA
Positive Regulation Of Triglyceride Biosynthetic Process (GO:0010867)	849	0.271983	0.595085	0	0	3.49025	4.54437	CTDNEP1
Programmed Necrotic Cell Death (GO:0097300)	850	0.271983	0.595085	0	0	3.49025	4.54437	RIPK1
Protein Localization To Endosome (GO:0036010)	851	0.271983	0.595085	0	0	3.49025	4.54437	RAB35
Regulation Of Amyloid Precursor Protein Catabolic Process (GO:1902991)	852	0.271983	0.595085	0	0	3.49025	4.54437	PRNP
Regulation Of Calcium Ion Transmembrane Transport (GO:1903169)	853	0.271983	0.595085	0	0	3.49025	4.54437	PRNP
Regulation Of Cardiac Muscle Cell Proliferation (GO:0060043)	854	0.271983	0.595085	0	0	3.49025	4.54437	POLR2D
Nitrogen Compound Transport (GO:0071705)	855	0.277111	0.595085	0	0	1.53286	1.96718	SLC43A1;CMTM6;LRRC8D;SCAMP2
Regulation Of Cysteine-Type Endopeptidase Activity Involved In Apoptotic Process (GO:0043281)	856	0.27809	0.595085	0	0	1.67765	2.14707	USP47;CARD9;NOD1
G1/S Transition Of Mitotic Cell Cycle (GO:0000082)	857	0.27809	0.595085	0	0	1.67765	2.14707	CDKN1B;CUL2;HINFP
Negative Regulation Of Inflammatory Response (GO:0050728)	858	0.27809	0.595085	0	0	1.67765	2.14707	MFHAS1;FEM1A;EXTL3
Protein-Containing Complex Disassembly (GO:0032984)	859	0.27809	0.595085	0	0	1.67765	2.14707	FRAT2;CHMP7;PEX14
Protein Localization To Nucleus (GO:0034504)	860	0.278818	0.595085	0	0	1.44257	1.84245	CTDNEP1;RRP7A;IPO9;IPO7;IPO4
Regulation Of Small Molecule Metabolic Process (GO:0062012)	861	0.278902	0.595085	0	0	1.99601	2.54869	BCKDK;MLYCD
Establishment Of Protein Localization To Plasma Membrane (GO:0061951)	862	0.278902	0.595085	0	0	1.99601	2.54869	ARFRP1;GOLPH3
Lysosome Organization (GO:0007040)	863	0.278902	0.595085	0	0	1.99601	2.54869	HPS4;PI4KB
mRNA Stabilization (GO:0048255)	864	0.278902	0.595085	0	0	1.99601	2.54869	MAPKAPK2;ELAVL1
Positive Regulation Of NIK/NF-kappaB Signaling (GO:1901224)	865	0.278902	0.595085	0	0	1.99601	2.54869	NOD1;RELA
Protein Transmembrane Import Into Intracellular Organelle (GO:0044743)	866	0.278902	0.595085	0	0	1.99601	2.54869	DNLZ;PEX14
Regulation Of Apoptotic Signaling Pathway (GO:2001233)	867	0.278902	0.595085	0	0	1.99601	2.54869	BCL2;GRINA
Regulation Of DNA-templated Transcription (GO:0006355)	868	0.281037	0.595085	0	0	1.11395	1.4139	ZNF496;CDKN1B;ZNF195;SATB1;CHD8;TCF7;EHMT1;UBP1;ZNF22;JADE2;MED16;RELA;UBE2L3;PURB;MTA1;ESRRA;MAP2K3;MED1;USP47;SMARCC1;ZNF263;ZGPAT;USP22;ARID5A;MSL2;IRF2BP2;ARID1B;USF2;KLF2;PEX14;HINFP;MSL1;NFKB2;PPM1A;ILF3;RIOX1;TNIP1;MORF4L2;PRKCQ;QRICH1;TCF3;SLC2A4RG;MCM2
Glycerophospholipid Biosynthetic Process (GO:0046474)	869	0.284889	0.595085	0	0	1.512	1.89854	MTMR3;PIP5K1B;PI4KB;AGPAT3
Positive Regulation Of MAPK Cascade (GO:0043410)	870	0.28554	0.595085	0	0	1.42771	1.78945	MFHAS1;CARD9;ERP29;CRKL;MAPK3
Response To Tumor Necrosis Factor (GO:0034612)	871	0.2876	0.595085	0	0	1.64459	2.04946	ERBIN;RIPK1;RELA
Positive Regulation Of Catabolic Process (GO:0009896)	872	0.2876	0.595085	0	0	1.64459	2.04946	CDKN1B;CCDC22;VSIR
Positive Regulation Of Epithelial Cell Migration (GO:0010634)	873	0.2876	0.595085	0	0	1.64459	2.04946	PIK3CB;RTN4;ARF6
Regulation Of mRNA Processing (GO:0050684)	874	0.291872	0.595085	0	0	1.92699	2.37297	TIA1;SUPT6H
Regulation Of Neuron Death (GO:1901214)	875	0.291872	0.595085	0	0	1.92699	2.37297	PRNP;SIGMAR1
Fat Cell Differentiation (GO:0045444)	876	0.291872	0.595085	0	0	1.92699	2.37297	MED1;AKT2
Negative Regulation Of Neuron Apoptotic Process (GO:0043524)	877	0.291872	0.595085	0	0	1.92699	2.37297	BCL2;RETREG1
Negative Regulation Of Cell Differentiation (GO:0045596)	878	0.292293	0.595085	0	0	1.41315	1.73817	MED1;SMARCC1;SDHAF2;RIOX1;NELFB
Peptidyl-Serine Phosphorylation (GO:0018105)	879	0.295548	0.595085	0	0	1.35429	1.65078	AKT2;MAPKAPK2;MKNK2;PRKCQ;RIPK1;CSNK1G2
Negative Regulation Of Canonical Wnt Signaling Pathway (GO:0090090)	880	0.297134	0.595085	0	0	1.6128	1.95725	SDHAF2;CHD8;AMFR
Regulation Of Cell Cycle G1/S Phase Transition (GO:1902806)	881	0.297134	0.595085	0	0	1.6128	1.95725	SMARCC1;CDKN1B;ARID1B
Regulation Of Establishment Of Protein Localization To Telomere (GO:0070203)	882	0.297224	0.595085	0	0	3.10214	3.76372	DKC1
Regulation Of Fatty Acid Beta-Oxidation (GO:0031998)	883	0.297224	0.595085	0	0	3.10214	3.76372	AKT2
Regulation Of Fatty Acid Oxidation (GO:0046320)	884	0.297224	0.595085	0	0	3.10214	3.76372	MLYCD
RNA Splicing, Via Endonucleolytic Cleavage And Ligation (GO:0000394)	885	0.297224	0.595085	0	0	3.10214	3.76372	TSEN54
TORC1 Signaling (GO:0038202)	886	0.297224	0.595085	0	0	3.10214	3.76372	RPTOR
Regulation Of Keratinocyte Proliferation (GO:0010837)	887	0.297224	0.595085	0	0	3.10214	3.76372	MED1
Regulation Of miRNA-mediated Gene Silencing (GO:0060964)	888	0.297224	0.595085	0	0	3.10214	3.76372	ELAVL1
Regulation Of Neurotransmitter Receptor Activity (GO:0099601)	889	0.297224	0.595085	0	0	3.10214	3.76372	MINK1
Carbohydrate Derivative Catabolic Process (GO:1901136)	890	0.297224	0.595085	0	0	3.10214	3.76372	STT3B
Regulation Of Protein Localization To Cajal Body (GO:1904869)	891	0.297224	0.595085	0	0	3.10214	3.76372	DKC1
Cell Projection Organization (GO:0030030)	892	0.297224	0.595085	0	0	3.10214	3.76372	PARVG
Regulation Of Synaptic Transmission, Glutamatergic (GO:0051966)	893	0.297224	0.595085	0	0	3.10214	3.76372	RNF167
Regulation Of Transcription From RNA Polymerase II Promoter In Response To Stress (GO:0043618)	894	0.297224	0.595085	0	0	3.10214	3.76372	KLF2
Regulation Of Transmembrane Transport (GO:0034762)	895	0.297224	0.595085	0	0	3.10214	3.76372	BCL2
Double-Strand Break Repair Via Break-Induced Replication (GO:0000727)	896	0.297224	0.595085	0	0	3.10214	3.76372	MCM2
Early Endosome To Golgi Transport (GO:0034498)	897	0.297224	0.595085	0	0	3.10214	3.76372	TRAPPC10
Serine Family Amino Acid Biosynthetic Process (GO:0009070)	898	0.297224	0.595085	0	0	3.10214	3.76372	SEPHS2
Endoderm Formation (GO:0001706)	899	0.297224	0.595085	0	0	3.10214	3.76372	ITGA5
Exit From Mitosis (GO:0010458)	900	0.297224	0.595085	0	0	3.10214	3.76372	CHMP7
Extrinsic Apoptotic Signaling Pathway In Absence Of Ligand (GO:0097192)	901	0.297224	0.595085	0	0	3.10214	3.76372	BCL2
tRNA 5'-Leader Removal (GO:0001682)	902	0.297224	0.595085	0	0	3.10214	3.76372	RPP25
Fatty Acid Transmembrane Transport (GO:1902001)	903	0.297224	0.595085	0	0	3.10214	3.76372	SLC2A1
Folic Acid Metabolic Process (GO:0046655)	904	0.297224	0.595085	0	0	3.10214	3.76372	FPGS
Ganglioside Metabolic Process (GO:0001573)	905	0.297224	0.595085	0	0	3.10214	3.76372	ST3GAL5
Triglyceride Biosynthetic Process (GO:0019432)	906	0.297224	0.595085	0	0	3.10214	3.76372	PCK2
Histone H2A Ubiquitination (GO:0033522)	907	0.297224	0.595085	0	0	3.10214	3.76372	RNF8
In Utero Embryonic Development (GO:0001701)	908	0.297224	0.595085	0	0	3.10214	3.76372	HINFP
Keratan Sulfate Metabolic Process (GO:0042339)	909	0.297224	0.595085	0	0	3.10214	3.76372	B4GAT1
Lung Development (GO:0030324)	910	0.297224	0.595085	0	0	3.10214	3.76372	POLR2D
Lysosomal Membrane Organization (GO:0097212)	911	0.297224	0.595085	0	0	3.10214	3.76372	CHMP7
Mitotic DNA Integrity Checkpoint Signaling (GO:0044774)	912	0.297224	0.595085	0	0	3.10214	3.76372	ZNF830
Mitotic DNA Replication (GO:1902969)	913	0.297224	0.595085	0	0	3.10214	3.76372	MCM2
Negative Regulation Of Neuron Differentiation (GO:0045665)	914	0.297224	0.595085	0	0	3.10214	3.76372	MED1
Negative Regulation Of Smooth Muscle Cell Proliferation (GO:0048662)	915	0.297224	0.595085	0	0	3.10214	3.76372	CDKN1B
Negative Regulation Of Viral Transcription (GO:0032897)	916	0.297224	0.595085	0	0	3.10214	3.76372	UBP1
Neural Crest Cell Differentiation (GO:0014033)	917	0.297224	0.595085	0	0	3.10214	3.76372	TCOF1
Nuclear RNA Surveillance (GO:0071027)	918	0.297224	0.595085	0	0	3.10214	3.76372	EXOSC6
Nuclear Pore Complex Assembly (GO:0051292)	919	0.297224	0.595085	0	0	3.10214	3.76372	RTN4
Phosphatidylinositol-3-Phosphate Biosynthetic Process (GO:0036092)	920	0.297224	0.595085	0	0	3.10214	3.76372	PIK3CB
Positive Regulation Of ERAD Pathway (GO:1904294)	921	0.297224	0.595085	0	0	3.10214	3.76372	UBQLN2
Positive Regulation Of calcineurin-NFAT Signaling Cascade (GO:0070886)	922	0.297224	0.595085	0	0	3.10214	3.76372	SPPL3
Positive Regulation Of Calcineurin-Mediated Signaling (GO:0106058)	923	0.297224	0.595085	0	0	3.10214	3.76372	SPPL3
Positive Regulation Of Collagen Metabolic Process (GO:0010714)	924	0.297224	0.595085	0	0	3.10214	3.76372	VSIR
Positive Regulation Of Cytokine Production Involved In Inflammatory Response (GO:1900017)	925	0.297224	0.595085	0	0	3.10214	3.76372	CARD9
Positive Regulation Of Double-Strand Break Repair Via Nonhomologous End Joining (GO:2001034)	926	0.297224	0.595085	0	0	3.10214	3.76372	KMT5B
Positive Regulation Of Immune System Process (GO:0002684)	927	0.297224	0.595085	0	0	3.10214	3.76372	PIK3CB
Positive Regulation Of Immunoglobulin Mediated Immune Response (GO:0002891)	928	0.297224	0.595085	0	0	3.10214	3.76372	KMT5B
Positive Regulation Of Isotype Switching (GO:0045830)	929	0.297224	0.595085	0	0	3.10214	3.76372	KMT5B
Positive Regulation Of Leukocyte Adhesion To Vascular Endothelial Cell (GO:1904996)	930	0.297224	0.595085	0	0	3.10214	3.76372	RELA
Positive Regulation Of Protein Localization To Cajal Body (GO:1904871)	931	0.297224	0.595085	0	0	3.10214	3.76372	DKC1
Positive Regulation Of Protein Localization To Chromosome, Telomeric Region (GO:1904816)	932	0.297224	0.595085	0	0	3.10214	3.76372	DKC1
Prostaglandin Metabolic Process (GO:0006693)	933	0.297224	0.595085	0	0	3.10214	3.76372	PNPLA8
Protein auto-ADP-ribosylation (GO:0070213)	934	0.297224	0.595085	0	0	3.10214	3.76372	PARP10
Regulation Of Cell Fate Specification (GO:0042659)	935	0.297224	0.595085	0	0	3.10214	3.76372	MTA1
Response To Lipopolysaccharide (GO:0032496)	936	0.300538	0.600981	0	0	1.47191	1.7695	TNIP1;MAPKAPK2;ERBIN;RELA
Regulation Of Apoptotic Process (GO:0042981)	937	0.300811	0.600981	0	0	1.16677	1.40161	MED1;USP47;ANKLE2;ACTN1;SIGMAR1;ARAF;RELA;RTN4;GOLPH3;AKT2;MORF4L2;BCL2;QRICH1;RIPK1;TAF9B;ZNF830;MAP3K11;MCM2
Regulation Of Cytokine-Mediated Signaling Pathway (GO:0001959)	938	0.304812	0.603834	0	0	1.86257	2.21285	SPPL2B;MAPKAPK2
SCF-dependent Proteasomal Ubiquitin-Dependent Protein Catabolic Process (GO:0031146)	939	0.304812	0.603834	0	0	1.86257	2.21285	FBXW5;CUL2
Histone Deacetylation (GO:0016575)	940	0.304812	0.603834	0	0	1.86257	2.21285	MTA1;MORF4L2
Monoubiquitinated Protein Deubiquitination (GO:0035520)	941	0.304812	0.603834	0	0	1.86257	2.21285	USP47;USP22
Peptidyl-Tyrosine Phosphorylation (GO:0018108)	942	0.304812	0.603834	0	0	1.86257	2.21285	JAK1;MAPK3
Positive Regulation Of MAP Kinase Activity (GO:0043406)	943	0.304812	0.603834	0	0	1.86257	2.21285	ERP29;MAP3K11
Cellular Response To Organonitrogen Compound (GO:0071417)	944	0.306686	0.603834	0	0	1.58221	1.87006	RPTOR;GOLPH3;RELA
Golgi Vesicle Transport (GO:0048193)	945	0.30762	0.603834	0	0	1.29762	1.52975	GOLPH3;TRAPPC10;SEC16A;SGSM2;TRAPPC9;ATP9B;SCAMP2
Protein Polyubiquitination (GO:0000209)	946	0.311573	0.603834	0	0	1.26541	1.47562	RNF167;HECTD1;UBE2E3;AMFR;BCL2;RNF8;MUL1;UBE2L3
Regulation Of Translational Initiation (GO:0006446)	947	0.31625	0.603834	0	0	1.55275	1.78757	RBM4;YTHDF1;EIF4EBP2
Regulation Of Tumor Necrosis Factor Production (GO:0032680)	948	0.31625	0.603834	0	0	1.55275	1.78757	MAPKAPK2;RIPK1;VSIR
Neuron Differentiation (GO:0030182)	949	0.31625	0.603834	0	0	1.55275	1.78757	SRF;BCCIP;RTN4
Regulation Of G1/S Transition Of Mitotic Cell Cycle (GO:2000045)	950	0.316285	0.603834	0	0	1.43388	1.65056	RPTOR;SMARCC1;CDKN1B;ARID1B
Negative Regulation Of Nucleic Acid-Templated Transcription (GO:1903507)	951	0.317164	0.603834	0	0	1.19659	1.37409	USP47;ILF3;CDKN1B;MTA1;ZGPAT;RIOX1;CHD8;ARID5A;EHMT1;PEX14;RELA;HINFP
Regulation Of Insulin Secretion (GO:0050796)	952	0.317707	0.603834	0	0	1.80231	2.06657	GLUD1;POLR2D
Regulation Of miRNA Transcription (GO:1902893)	953	0.317707	0.603834	0	0	1.80231	2.06657	SRF;RELA
Regulation Of Mitochondrion Organization (GO:0010821)	954	0.317707	0.603834	0	0	1.80231	2.06657	GOLPH3;MUL1
Regulation Of Myoblast Differentiation (GO:0045661)	955	0.317707	0.603834	0	0	1.80231	2.06657	SMARCC1;ARID1B
Response To Hydrogen Peroxide (GO:0042542)	956	0.317707	0.603834	0	0	1.80231	2.06657	RIPK1;RELA
Response To Peptide Hormone (GO:0043434)	957	0.317707	0.603834	0	0	1.80231	2.06657	SLC2A1;EIF2B1
Modulation Of Chemical Synaptic Transmission (GO:0050804)	958	0.317707	0.603834	0	0	1.80231	2.06657	RNF167;EIF4EBP2
Organelle Transport Along Microtubule (GO:0072384)	959	0.317707	0.603834	0	0	1.80231	2.06657	BORCS6;PEX14
Positive Regulation Of Transcription By RNA Polymerase II (GO:0045944)	960	0.317983	0.603834	0	0	1.13522	1.30069	ESRRA;MED1;ZNF263;AKNA;CHD8;SRF;ZMYND8;PTOV1;UBP1;GTF2F1;MED16;SUPT6H;USF2;KLF2;RELA;HINFP;NFKB2;TNIP1;RIPK1;TCF3;CDK13;MAPK3
Positive Regulation Of Cytokine Production (GO:0001819)	961	0.318772	0.603834	0	0	1.2804	1.46385	BTN3A1;CARD9;PRKCQ;RIPK1;NOD1;LY9;RELA
Regulation Of Establishment Of Protein Localization (GO:0070201)	962	0.321593	0.603834	0	0	2.79164	3.16703	CEP295
Regulation Of Extrinsic Apoptotic Signaling Pathway In Absence Of Ligand (GO:2001239)	963	0.321593	0.603834	0	0	2.79164	3.16703	BCL2
acetyl-CoA Biosynthetic Process (GO:0006085)	964	0.321593	0.603834	0	0	2.79164	3.16703	MLYCD
Blood Vessel Diameter Maintenance (GO:0097746)	965	0.321593	0.603834	0	0	2.79164	3.16703	KLF2
Regulation Of Platelet Activation (GO:0010543)	966	0.321593	0.603834	0	0	2.79164	3.16703	PRKCQ
Cell Morphogenesis Involved In Differentiation (GO:0000904)	967	0.321593	0.603834	0	0	2.79164	3.16703	ACTN1
Cellular Response To Arsenic-Containing Substance (GO:0071243)	968	0.321593	0.603834	0	0	2.79164	3.16703	MKNK2
Cellular Response To dsRNA (GO:0071359)	969	0.321593	0.603834	0	0	2.79164	3.16703	MUL1
Cellular Response To Leucine Starvation (GO:1990253)	970	0.321593	0.603834	0	0	2.79164	3.16703	RNF167
Resolution Of Meiotic Recombination Intermediates (GO:0000712)	971	0.321593	0.603834	0	0	2.79164	3.16703	CENPS
Ribonucleoside Bisphosphate Metabolic Process (GO:0033875)	972	0.321593	0.603834	0	0	2.79164	3.16703	MLYCD
Endodermal Cell Differentiation (GO:0035987)	973	0.321593	0.603834	0	0	2.79164	3.16703	ITGA5
Triglyceride Homeostasis (GO:0070328)	974	0.321593	0.603834	0	0	2.79164	3.16703	PNPLA8
Lipoprotein Biosynthetic Process (GO:0042158)	975	0.321593	0.603834	0	0	2.79164	3.16703	ATG16L2
Long-Term Memory (GO:0007616)	976	0.321593	0.603834	0	0	2.79164	3.16703	PRNP
Membrane Protein Intracellular Domain Proteolysis (GO:0031293)	977	0.321593	0.603834	0	0	2.79164	3.16703	SPPL2B
Negative Regulation Of T Cell Proliferation (GO:0042130)	978	0.321593	0.603834	0	0	2.79164	3.16703	PRNP
Negative Regulation Of Anoikis (GO:2000811)	979	0.321593	0.603834	0	0	2.79164	3.16703	ITGA5
Negative Regulation Of Axonogenesis (GO:0050771)	980	0.321593	0.603834	0	0	2.79164	3.16703	RTN4
Negative Regulation Of Fatty Acid Biosynthetic Process (GO:0045717)	981	0.321593	0.603834	0	0	2.79164	3.16703	DCAF5
Negative Regulation Of Phosphate Metabolic Process (GO:0045936)	982	0.321593	0.603834	0	0	2.79164	3.16703	CDKN1B
Negative Regulation Of Receptor Internalization (GO:0002091)	983	0.321593	0.603834	0	0	2.79164	3.16703	UBQLN2
Negative Regulation Of Response To Wounding (GO:1903035)	984	0.321593	0.603834	0	0	2.79164	3.16703	EXTL3
Negative Regulation Of Signaling Receptor Activity (GO:2000272)	985	0.321593	0.603834	0	0	2.79164	3.16703	ZGPAT
Positive Regulation Of Amyloid Precursor Protein Catabolic Process (GO:1902993)	986	0.321593	0.603834	0	0	2.79164	3.16703	RELA
Positive Regulation Of Dendritic Spine Development (GO:0060999)	987	0.321593	0.603834	0	0	2.79164	3.16703	C21ORF91
Positive Regulation Of Lipid Catabolic Process (GO:0050996)	988	0.321593	0.603834	0	0	2.79164	3.16703	AKT2
Positive Regulation Of Lipid Metabolic Process (GO:0045834)	989	0.321593	0.603834	0	0	2.79164	3.16703	RPTOR
Positive Regulation Of Locomotion (GO:0040017)	990	0.321593	0.603834	0	0	2.79164	3.16703	AKT2
Positive Regulation Of mRNA Metabolic Process (GO:1903313)	991	0.321593	0.603834	0	0	2.79164	3.16703	GTPBP1
Positive Regulation Of Stress-Activated Protein Kinase Signaling Cascade (GO:0070304)	992	0.321593	0.603834	0	0	2.79164	3.16703	CARD9
Protein Localization To Vacuole (GO:0072665)	993	0.321593	0.603834	0	0	2.79164	3.16703	RTN4
Purine Nucleoside Bisphosphate Metabolic Process (GO:0034032)	994	0.321593	0.603834	0	0	2.79164	3.16703	MLYCD
Regulation Of DNA-templated DNA Replication Initiation (GO:0030174)	995	0.321593	0.603834	0	0	2.79164	3.16703	MCM2
Regulation Of RNA Export From Nucleus (GO:0046831)	996	0.321593	0.603834	0	0	2.79164	3.16703	SUPT6H
Regulation Of Cell Fate Commitment (GO:0010453)	997	0.321593	0.603834	0	0	2.79164	3.16703	MTA1
Antigen Receptor-Mediated Signaling Pathway (GO:0050851)	998	0.324185	0.606064	0	0	1.41559	1.59458	BTN3A1;BCL2;EIF2B1;SPPL3
Negative Regulation Of Cellular Biosynthetic Process (GO:0031327)	999	0.324185	0.606064	0	0	1.41559	1.59458	RBM4;ILF3;TIA1;DCAF5
Regulation Of Cyclin-Dependent Protein Serine/Threonine Kinase Activity (GO:0000079)	1000	0.325819	0.606064	0	0	1.52437	1.70945	CDKN1B;BCCIP;IPO7
Positive Regulation Of Wnt Signaling Pathway (GO:0030177)	1001	0.325819	0.606064	0	0	1.52437	1.70945	USP47;PPM1A;CSNK1G2
Regulation Of Translation (GO:0006417)	1002	0.329992	0.606064	0	0	1.26362	1.40096	RBM4;YTHDF1;ILF3;TIA1;TCOF1;POLDIP3;ELAVL1
I-kappaB kinase/NF-kappaB Signaling (GO:0007249)	1003	0.330545	0.606064	0	0	1.74581	1.93263	RELA;NFKB2
Regulation Of Stem Cell Differentiation (GO:2000736)	1004	0.330545	0.606064	0	0	1.74581	1.93263	MTA1;NELFB
Regulation Of Tumor Necrosis Factor-Mediated Signaling Pathway (GO:0010803)	1005	0.330545	0.606064	0	0	1.74581	1.93263	SPPL2B;MAPKAPK2
Response To Light Stimulus (GO:0009416)	1006	0.330545	0.606064	0	0	1.74581	1.93263	TP53I13;REV1
Erythrocyte Differentiation (GO:0030218)	1007	0.330545	0.606064	0	0	1.74581	1.93263	MED1;MFHAS1
Negative Regulation Of Response To Biotic Stimulus (GO:0002832)	1008	0.330545	0.606064	0	0	1.74581	1.93263	PCBP2;MUL1
Phosphate-Containing Compound Metabolic Process (GO:0006796)	1009	0.333306	0.606064	0	0	1.33159	1.46301	RPTOR;BCKDK;PPM1A;PIK3CB;MAPK3
Regulation Of GTPase Activity (GO:0043087)	1010	0.333306	0.606064	0	0	1.33159	1.46301	RABGAP1;SGSM2;ARAP1;VAV1;TBC1D10B
Response To Lipid (GO:0033993)	1011	0.335388	0.606064	0	0	1.497	1.63542	MAPKAPK2;POLR2D;ERBIN
Positive Regulation Of Defense Response (GO:0031349)	1012	0.335388	0.606064	0	0	1.497	1.63542	FEM1A;TNIP1;RIPK1
Positive Regulation Of Protein Localization (GO:1903829)	1013	0.335388	0.606064	0	0	1.497	1.63542	CEP295;RTN4;JAK1
B Cell Differentiation (GO:0030183)	1014	0.343316	0.606064	0	0	1.69274	1.80971	IRF2BP2;TCF3
Regulation Of Phosphatidylinositol 3-Kinase Signaling (GO:0014066)	1015	0.343316	0.606064	0	0	1.69274	1.80971	PIP5K1B;EXTL3
Regulation Of Stress-Activated MAPK Cascade (GO:0032872)	1016	0.343316	0.606064	0	0	1.69274	1.80971	CARD9;MAPK3
Cellular Response To Interleukin-1 (GO:0071347)	1017	0.343316	0.606064	0	0	1.69274	1.80971	RELA;MAPK3
Regulation Of Ubiquitin-Dependent Protein Catabolic Process (GO:2000058)	1018	0.343316	0.606064	0	0	1.69274	1.80971	GNA12;CCDC22
Long-Chain Fatty Acid Metabolic Process (GO:0001676)	1019	0.343316	0.606064	0	0	1.69274	1.80971	SCP2;PNPLA8
Negative Regulation Of Viral Genome Replication (GO:0045071)	1020	0.343316	0.606064	0	0	1.69274	1.80971	ILF3;TNIP1
Supramolecular Fiber Organization (GO:0097435)	1021	0.344599	0.606064	0	0	1.27119	1.35429	MAP7D3;ACTN1;ELMO2;RIPK1;RHOF;ARHGAP25
Positive Regulation Of Protein Metabolic Process (GO:0051247)	1022	0.344599	0.606064	0	0	1.27119	1.35429	YTHDF1;CDKN1B;POLDIP3;CARD9;ELAVL1;KLF2
Regulation Of mRNA Stability (GO:0043488)	1023	0.34495	0.606064	0	0	1.47059	1.56523	YTHDF1;MAPKAPK2;ELAVL1
Cellular Response To Tumor Necrosis Factor (GO:0071356)	1024	0.34495	0.606064	0	0	1.47059	1.56523	ERBIN;RIPK1;RELA
Negative Regulation Of Binding (GO:0051100)	1025	0.34495	0.606064	0	0	1.47059	1.56523	DNAJB2;GTF2F1;PEX14
Regulation Of Chemotaxis (GO:0050920)	1026	0.34512	0.606064	0	0	2.5376	2.69967	YTHDF1
Regulation Of Chromosome Separation (GO:1905818)	1027	0.34512	0.606064	0	0	2.5376	2.69967	NCAPH2
DNA Alkylation (GO:0006305)	1028	0.34512	0.606064	0	0	2.5376	2.69967	EHMT1
GTP Metabolic Process (GO:0046039)	1029	0.34512	0.606064	0	0	2.5376	2.69967	GTPBP1
V(D)J Recombination (GO:0033151)	1030	0.34512	0.606064	0	0	2.5376	2.69967	TCF3
acyl-CoA Biosynthetic Process (GO:0071616)	1031	0.34512	0.606064	0	0	2.5376	2.69967	MLYCD
Arachidonic Acid Metabolic Process (GO:0019369)	1032	0.34512	0.606064	0	0	2.5376	2.69967	PNPLA8
Regulation Of Nitric-Oxide Synthase Activity (GO:0050999)	1033	0.34512	0.606064	0	0	2.5376	2.69967	PIK3CB
Regulation Of Protein Processing (GO:0070613)	1034	0.34512	0.606064	0	0	2.5376	2.69967	PRNP
Regulation Of Regulatory T Cell Differentiation (GO:0045589)	1035	0.34512	0.606064	0	0	2.5376	2.69967	VSIR
Regulation Of Toll-Like Receptor 4 Signaling Pathway (GO:0034143)	1036	0.34512	0.606064	0	0	2.5376	2.69967	MFHAS1
Regulation Of Vesicle Size (GO:0097494)	1037	0.34512	0.606064	0	0	2.5376	2.69967	BORCS6
Response To Cadmium Ion (GO:0046686)	1038	0.34512	0.606064	0	0	2.5376	2.69967	MAPK3
Response To Exogenous dsRNA (GO:0043330)	1039	0.34512	0.606064	0	0	2.5376	2.69967	MUL1
Response To Glucocorticoid (GO:0051384)	1040	0.34512	0.606064	0	0	2.5376	2.69967	UBE2L3
Ribosome Disassembly (GO:0032790)	1041	0.34512	0.606064	0	0	2.5376	2.69967	DENR
Electron Transport Chain (GO:0022900)	1042	0.34512	0.606064	0	0	2.5376	2.69967	POR
Signal Peptide Processing (GO:0006465)	1043	0.34512	0.606064	0	0	2.5376	2.69967	SPPL3
Folic Acid-Containing Compound Metabolic Process (GO:0006760)	1044	0.34512	0.606064	0	0	2.5376	2.69967	FPGS
Glial Cell Development (GO:0021782)	1045	0.34512	0.606064	0	0	2.5376	2.69967	EIF2B1
Glycerophospholipid Catabolic Process (GO:0046475)	1046	0.34512	0.606064	0	0	2.5376	2.69967	PNPLA8
Intracellular Zinc Ion Homeostasis (GO:0006882)	1047	0.34512	0.606064	0	0	2.5376	2.69967	SLC30A5
Mitochondrial Fission (GO:0000266)	1048	0.34512	0.606064	0	0	2.5376	2.69967	MUL1
Natural Killer Cell Mediated Immunity (GO:0002228)	1049	0.34512	0.606064	0	0	2.5376	2.69967	PLEKHM2
Negative Regulation Of Axon Extension (GO:0030517)	1050	0.34512	0.606064	0	0	2.5376	2.69967	RTN4
Negative Regulation Of Cellular Senescence (GO:2000773)	1051	0.34512	0.606064	0	0	2.5376	2.69967	MAP3K3
Negative Regulation Of Fatty Acid Metabolic Process (GO:0045922)	1052	0.34512	0.606064	0	0	2.5376	2.69967	DCAF5
Negative Regulation Of Interleukin-2 Production (GO:0032703)	1053	0.34512	0.606064	0	0	2.5376	2.69967	PRNP
Negative Regulation Of Microtubule Depolymerization (GO:0007026)	1054	0.34512	0.606064	0	0	2.5376	2.69967	MID1IP1
Neuron Projection Organization (GO:0106027)	1055	0.34512	0.606064	0	0	2.5376	2.69967	PRNP
Organic Cyclic Compound Biosynthetic Process (GO:1901362)	1056	0.34512	0.606064	0	0	2.5376	2.69967	SCP2
Phosphatidylglycerol Metabolic Process (GO:0046471)	1057	0.34512	0.606064	0	0	2.5376	2.69967	PNPLA8
Phosphatidylinositol Dephosphorylation (GO:0046856)	1058	0.34512	0.606064	0	0	2.5376	2.69967	MTMR3
Positive Regulation Of T Cell Receptor Signaling Pathway (GO:0050862)	1059	0.34512	0.606064	0	0	2.5376	2.69967	RELA
Positive Regulation Of Glucose Metabolic Process (GO:0010907)	1060	0.34512	0.606064	0	0	2.5376	2.69967	AKT2
Positive Regulation Of Neuron Apoptotic Process (GO:0043525)	1061	0.34512	0.606064	0	0	2.5376	2.69967	PRNP
Positive Regulation Of Phosphoprotein Phosphatase Activity (GO:0032516)	1062	0.34512	0.606064	0	0	2.5376	2.69967	GNA12
Positive Regulation Of Transcription From RNA Polymerase II Promoter In Response To Stress (GO:0036003)	1063	0.34512	0.606064	0	0	2.5376	2.69967	KLF2
Protein Import Into Peroxisome Matrix (GO:0016558)	1064	0.34512	0.606064	0	0	2.5376	2.69967	PEX14
Protein Localization To Endoplasmic Reticulum (GO:0070972)	1065	0.34512	0.606064	0	0	2.5376	2.69967	SEC16A
Regulation Of Cell Migration Involved In Sprouting Angiogenesis (GO:0090049)	1066	0.34512	0.606064	0	0	2.5376	2.69967	MAP3K3
Positive Regulation Of Cellular Process (GO:0048522)	1067	0.34622	0.607426	0	0	1.16667	1.23746	RPTOR;USP47;SMARCC1;AKT2;SRF;BCL2;KRAS;TAF9B;TMEM250;ARID1B;RELA;CRKL
Epigenetic Regulation Of Gene Expression (GO:0040029)	1068	0.354501	0.614867	0	0	1.44509	1.49862	MTA1;RNF8;ARID1B
Macroautophagy (GO:0016236)	1069	0.355882	0.614867	0	0	1.34683	1.39148	MTMR3;ATG16L2;TBC1D5;CHMP7
Cellular Response To Amino Acid Starvation (GO:0034198)	1070	0.356007	0.614867	0	0	1.64279	1.69668	RNF167;MAPK3
Monocarboxylic Acid Biosynthetic Process (GO:0072330)	1071	0.356007	0.614867	0	0	1.64279	1.69668	SCP2;MLYCD
Nucleobase-Containing Compound Catabolic Process (GO:0034655)	1072	0.356007	0.614867	0	0	1.64279	1.69668	EXOSC6;PPP1R8
Phosphatidylinositol Phosphate Biosynthetic Process (GO:0046854)	1073	0.356007	0.614867	0	0	1.64279	1.69668	PIK3CB;PI4KB
Phosphatidylinositol-Mediated Signaling (GO:0048015)	1074	0.356007	0.614867	0	0	1.64279	1.69668	PIK3CB;PI4KB
Protein Deacetylation (GO:0006476)	1075	0.356007	0.614867	0	0	1.64279	1.69668	MTA1;MORF4L2
Protein Polymerization (GO:0051258)	1076	0.356007	0.614867	0	0	1.64279	1.69668	MAP7D3;MID1IP1
Negative Regulation Of Cytokine Production (GO:0001818)	1077	0.363814	0.614867	0	0	1.33066	1.34545	PRNP;ADCY7;EXTL3;VSIR
2-Oxoglutarate Metabolic Process (GO:0006103)	1078	0.367832	0.614867	0	0	2.32591	2.3262	DLST
DNA Damage Response, Signal Transduction By P53 Class Mediator Resulting In Cell Cycle Arrest (GO:0006977)	1079	0.367832	0.614867	0	0	2.32591	2.3262	CDKN1B
Regulation Of Dephosphorylation (GO:0035303)	1080	0.367832	0.614867	0	0	2.32591	2.3262	MTMR3
Regulation Of Fibroblast Migration (GO:0010762)	1081	0.367832	0.614867	0	0	2.32591	2.3262	GNA12
Regulation Of Glycogen Biosynthetic Process (GO:0005979)	1082	0.367832	0.614867	0	0	2.32591	2.3262	AKT2
Regulation Of Macrophage Activation (GO:0043030)	1083	0.367832	0.614867	0	0	2.32591	2.3262	MFHAS1
Aminoglycan Biosynthetic Process (GO:0006023)	1084	0.367832	0.614867	0	0	2.32591	2.3262	B4GAT1
Bile Acid Biosynthetic Process (GO:0006699)	1085	0.367832	0.614867	0	0	2.32591	2.3262	SCP2
Regulation Of Protein Sumoylation (GO:0033233)	1086	0.367832	0.614867	0	0	2.32591	2.3262	MUL1
Cellular Response To Amyloid-Beta (GO:1904646)	1087	0.367832	0.614867	0	0	2.32591	2.3262	PRNP
Regulation Of Triglyceride Biosynthetic Process (GO:0010866)	1088	0.367832	0.614867	0	0	2.32591	2.3262	CTDNEP1
Regulation Of Vascular Endothelial Growth Factor Receptor Signaling Pathway (GO:0030947)	1089	0.367832	0.614867	0	0	2.32591	2.3262	ITGA5
Response To Amyloid-Beta (GO:1904645)	1090	0.367832	0.614867	0	0	2.32591	2.3262	PRNP
Reticulophagy (GO:0061709)	1091	0.367832	0.614867	0	0	2.32591	2.3262	RETREG1
Embryonic Skeletal System Development (GO:0048706)	1092	0.367832	0.614867	0	0	2.32591	2.3262	POLR2D
Endonucleolytic Cleavage Of Tricistronic rRNA Transcript (SSU-rRNA, 5.8S rRNA, LSU-rRNA) (GO:0000479)	1093	0.367832	0.614867	0	0	2.32591	2.3262	KRI1
Endoplasmic Reticulum Tubular Network Organization (GO:0071786)	1094	0.367832	0.614867	0	0	2.32591	2.3262	RTN4
Fatty Acid Transport (GO:0015908)	1095	0.367832	0.614867	0	0	2.32591	2.3262	SLC25A17
Heterotypic Cell-Cell Adhesion (GO:0034113)	1096	0.367832	0.614867	0	0	2.32591	2.3262	ITGA5
Vitamin Transport (GO:0051180)	1097	0.367832	0.614867	0	0	2.32591	2.3262	SLC2A1
Zinc Ion Transmembrane Transport (GO:0071577)	1098	0.367832	0.614867	0	0	2.32591	2.3262	SLC30A5
miRNA-mediated Gene Silencing By Inhibition Of Translation (GO:0035278)	1099	0.367832	0.614867	0	0	2.32591	2.3262	RBM4
Microvillus Organization (GO:0032528)	1100	0.367832	0.614867	0	0	2.32591	2.3262	MINK1
Natural Killer Cell Mediated Cytotoxicity (GO:0042267)	1101	0.367832	0.614867	0	0	2.32591	2.3262	PLEKHM2
Negative Regulation Of Small GTPase Mediated Signal Transduction (GO:0051058)	1102	0.367832	0.614867	0	0	2.32591	2.3262	ARHGAP25
Negative Regulation Of Type I Interferon-Mediated Signaling Pathway (GO:0060339)	1103	0.367832	0.614867	0	0	2.32591	2.3262	MUL1
Odontogenesis (GO:0042476)	1104	0.367832	0.614867	0	0	2.32591	2.3262	ZNF22
Organic Hydroxy Compound Transport (GO:0015850)	1105	0.367832	0.614867	0	0	2.32591	2.3262	POLR2D
Peptidyl-Threonine Dephosphorylation (GO:0035970)	1106	0.367832	0.614867	0	0	2.32591	2.3262	PPM1A
Phagocytosis, Engulfment (GO:0006911)	1107	0.367832	0.614867	0	0	2.32591	2.3262	ARHGAP25
Phosphatidylethanolamine Metabolic Process (GO:0046337)	1108	0.367832	0.614867	0	0	2.32591	2.3262	PNPLA8
Positive Regulation Of Cholesterol Transport (GO:0032376)	1109	0.367832	0.614867	0	0	2.32591	2.3262	SCP2
Positive Regulation Of Chromosome Separation (GO:1905820)	1110	0.367832	0.614867	0	0	2.32591	2.3262	NCAPH2
Positive Regulation Of Glucose Import (GO:0046326)	1111	0.367832	0.614867	0	0	2.32591	2.3262	AKT2
Positive Regulation Of Interleukin-4 Production (GO:0032753)	1112	0.367832	0.614867	0	0	2.32591	2.3262	PRKCQ
Positive Regulation Of Mitochondrial Fission (GO:0090141)	1113	0.367832	0.614867	0	0	2.32591	2.3262	MUL1
Positive Regulation Of Oxidoreductase Activity (GO:0051353)	1114	0.367832	0.614867	0	0	2.32591	2.3262	POR
Positive Regulation Of Phosphatase Activity (GO:0010922)	1115	0.367832	0.614867	0	0	2.32591	2.3262	GNA12
Positive Regulation Of Triglyceride Metabolic Process (GO:0090208)	1116	0.367832	0.614867	0	0	2.32591	2.3262	CTDNEP1
Regulation Of B Cell Activation (GO:0050864)	1117	0.367832	0.614867	0	0	2.32591	2.3262	SUPT6H
Regulation Of Golgi Organization (GO:1903358)	1118	0.367832	0.614867	0	0	2.32591	2.3262	MAPK3
Regulation Of DNA Repair (GO:0006282)	1119	0.367869	0.614867	0	0	1.27042	1.27046	SMARCC1;MORF4L2;USP22;RNF8;ARID1B
Regulation Of Cell Differentiation (GO:0045595)	1120	0.367869	0.614867	0	0	1.27042	1.27046	SMARCC1;MTA1;SRF;SUPT6H;ARID1B
Regulation Of Neuron Differentiation (GO:0045664)	1121	0.36861	0.615008	0	0	1.59569	1.59252	MED1;TCF3
Protein Localization To Chromosome (GO:0034502)	1122	0.36861	0.615008	0	0	1.59569	1.59252	ZMYND8;CHMP7
Intracellular Monoatomic Cation Homeostasis (GO:0030003)	1123	0.371742	0.61968	0	0	1.31487	1.30114	PRNP;STIM2;SLC30A5;CCDC22
Import Into Nucleus (GO:0051170)	1124	0.373543	0.622129	0	0	1.39664	1.3753	IPO9;IPO7;IPO4
Response To Metal Ion (GO:0010038)	1125	0.381116	0.625917	0	0	1.55121	1.49638	BCL2;NDRG1
Dicarboxylic Acid Metabolic Process (GO:0043648)	1126	0.381116	0.625917	0	0	1.55121	1.49638	FPGS;DLST
Regulation Of Response To External Stimulus (GO:0032101)	1127	0.383026	0.625917	0	0	1.37361	1.31818	AKNA;NMT1;RELA
Macromolecule Catabolic Process (GO:0009057)	1128	0.383026	0.625917	0	0	1.37361	1.31818	EXOSC6;PPP1R8;RIPK1
Protein Import Into Nucleus (GO:0006606)	1129	0.383026	0.625917	0	0	1.37361	1.31818	IPO9;IPO7;IPO4
Regulation Of Cellular Response To Heat (GO:1900034)	1130	0.389759	0.625917	0	0	2.14678	2.02275	MAPKAPK2
Regulation Of Defense Response To Virus (GO:0050688)	1131	0.389759	0.625917	0	0	2.14678	2.02275	PCBP2
DNA Replication Checkpoint Signaling (GO:0000076)	1132	0.389759	0.625917	0	0	2.14678	2.02275	ZNF830
Fc-gamma Receptor Signaling Pathway Involved In Phagocytosis (GO:0038096)	1133	0.389759	0.625917	0	0	2.14678	2.02275	VAV1
Regulation Of Hippo Signaling (GO:0035330)	1134	0.389759	0.625917	0	0	2.14678	2.02275	MAP2K3
acetyl-CoA Metabolic Process (GO:0006084)	1135	0.389759	0.625917	0	0	2.14678	2.02275	MLYCD
Regulation Of mRNA Metabolic Process (GO:1903311)	1136	0.389759	0.625917	0	0	2.14678	2.02275	SUPT6H
Regulation Of Microtubule Depolymerization (GO:0031114)	1137	0.389759	0.625917	0	0	2.14678	2.02275	MID1IP1
Amyloid Fibril Formation (GO:1990000)	1138	0.389759	0.625917	0	0	2.14678	2.02275	RIPK1
Regulation Of Myeloid Cell Differentiation (GO:0045637)	1139	0.389759	0.625917	0	0	2.14678	2.02275	PURB
Regulation Of Platelet Aggregation (GO:0090330)	1140	0.389759	0.625917	0	0	2.14678	2.02275	PRKCQ
Cellular Response To Cadmium Ion (GO:0071276)	1141	0.389759	0.625917	0	0	2.14678	2.02275	MAPK3
Regulation Of Vascular Associated Smooth Muscle Cell Proliferation (GO:1904705)	1142	0.389759	0.625917	0	0	2.14678	2.02275	CDKN1B
Regulation Of Viral Transcription (GO:0046782)	1143	0.389759	0.625917	0	0	2.14678	2.02275	UBP1
Dendritic Spine Organization (GO:0097061)	1144	0.389759	0.625917	0	0	2.14678	2.02275	PRNP
Determination Of Heart Left/Right Asymmetry (GO:0061371)	1145	0.389759	0.625917	0	0	2.14678	2.02275	SRF
Endosome To Lysosome Transport Via Multivesicular Body Sorting Pathway (GO:0032510)	1146	0.389759	0.625917	0	0	2.14678	2.02275	CHMP7
Establishment Or Maintenance Of Apical/Basal Cell Polarity (GO:0035088)	1147	0.389759	0.625917	0	0	2.14678	2.02275	ERBIN
Heart Looping (GO:0001947)	1148	0.389759	0.625917	0	0	2.14678	2.02275	SRF
Wound Healing, Spreading Of Cells (GO:0044319)	1149	0.389759	0.625917	0	0	2.14678	2.02275	ITGA5
Histone H4-K5 Acetylation (GO:0043981)	1150	0.389759	0.625917	0	0	2.14678	2.02275	JADE2
Histone H4-K8 Acetylation (GO:0043982)	1151	0.389759	0.625917	0	0	2.14678	2.02275	JADE2
Lamellipodium Assembly (GO:0030032)	1152	0.389759	0.625917	0	0	2.14678	2.02275	GOLPH3
Late Endosome To Lysosome Transport (GO:1902774)	1153	0.389759	0.625917	0	0	2.14678	2.02275	CHMP7
Microvillus Assembly (GO:0030033)	1154	0.389759	0.625917	0	0	2.14678	2.02275	MINK1
Midbody Abscission (GO:0061952)	1155	0.389759	0.625917	0	0	2.14678	2.02275	CHMP7
Negative Regulation Of Endocytosis (GO:0045806)	1156	0.389759	0.625917	0	0	2.14678	2.02275	ARF6
Negative Regulation Of Lipid Biosynthetic Process (GO:0051055)	1157	0.389759	0.625917	0	0	2.14678	2.02275	DCAF5
Nuclear Pore Organization (GO:0006999)	1158	0.389759	0.625917	0	0	2.14678	2.02275	RTN4
Nucleotide Biosynthetic Process (GO:0009165)	1159	0.389759	0.625917	0	0	2.14678	2.02275	PRPSAP1
Plasma Membrane Invagination (GO:0099024)	1160	0.389759	0.625917	0	0	2.14678	2.02275	ARHGAP25
Positive Regulation Of Monoatomic Ion Transport (GO:0043270)	1161	0.389759	0.625917	0	0	2.14678	2.02275	STIM2
Positive Regulation Of Neuron Death (GO:1901216)	1162	0.389759	0.625917	0	0	2.14678	2.02275	PRNP
Positive Regulation Of Protein Tyrosine Kinase Activity (GO:0061098)	1163	0.389759	0.625917	0	0	2.14678	2.02275	PRNP
Positive Regulation Of Proteasomal Protein Catabolic Process (GO:1901800)	1164	0.392476	0.625917	0	0	1.35131	1.26386	DNAJB2;ZER1;HECTD1
Regulation Of Cyclin-Dependent Protein Kinase Activity (GO:1904029)	1165	0.393515	0.625917	0	0	1.50913	1.40747	CDKN1B;BCCIP
Regulation Of Protein Localization To Nucleus (GO:1900180)	1166	0.393515	0.625917	0	0	1.50913	1.40747	MFHAS1;JAK1
Glucose Metabolic Process (GO:0006006)	1167	0.393515	0.625917	0	0	1.50913	1.40747	POLR2D;PCK2
Positive Regulation Of Secretion By Cell (GO:1903532)	1168	0.393515	0.625917	0	0	1.50913	1.40747	GOLPH3;ARF6
Cellular Response To Cytokine Stimulus (GO:0071345)	1169	0.394357	0.625917	0	0	1.19758	1.11435	SELPLG;TCF7;ERBIN;RIPK1;RELA;JAK1
DNA Repair (GO:0006281)	1170	0.394644	0.625917	0	0	1.13659	1.05677	VCPIP1;USP47;PARP4;MTA1;ZBTB1;RNF8;KMT5B;FAAP100;HINFP;CENPS
Mitotic Cell Cycle Phase Transition (GO:0044772)	1171	0.395471	0.625917	0	0	1.26966	1.17784	CDKN1B;CUL2;CHMP7;HINFP
Negative Regulation Of Macromolecule Biosynthetic Process (GO:0010558)	1172	0.401888	0.625917	0	0	1.32973	1.21216	RBM4;ILF3;TIA1
Positive Regulation Of Response To External Stimulus (GO:0032103)	1173	0.401888	0.625917	0	0	1.32973	1.21216	FEM1A;TNIP1;RIPK1
Regulation Of Proteasomal Protein Catabolic Process (GO:0061136)	1174	0.4058	0.625917	0	0	1.46927	1.32513	GNA12;ARAF
Fatty Acid Oxidation (GO:0019395)	1175	0.4058	0.625917	0	0	1.46927	1.32513	SLC25A17;SCP2
Wound Healing (GO:0042060)	1176	0.4058	0.625917	0	0	1.46927	1.32513	SRF;CHMP7
Negative Regulation Of Immune Response (GO:0050777)	1177	0.4058	0.625917	0	0	1.46927	1.32513	PCBP2;MUL1
Nucleus Organization (GO:0006997)	1178	0.4058	0.625917	0	0	1.46927	1.32513	CTDNEP1;CHMP7
Positive Regulation Of mRNA Catabolic Process (GO:0061014)	1179	0.4058	0.625917	0	0	1.46927	1.32513	YTHDF1;GTPBP1
Regulation Of Cell-Matrix Adhesion (GO:0001952)	1180	0.4058	0.625917	0	0	1.46927	1.32513	MINK1;PIK3CB
Protein Stabilization (GO:0050821)	1181	0.406808	0.625917	0	0	1.18047	1.06173	SEC16A;HPS4;DNLZ;MUL1;TAF9B;RTN4
DNA Methylation (GO:0006306)	1182	0.410928	0.625917	0	0	1.99324	1.77266	EHMT1
DNA Repair-Dependent Chromatin Remodeling (GO:0140861)	1183	0.410928	0.625917	0	0	1.99324	1.77266	RNF8
Regulation Of Early Endosome To Late Endosome Transport (GO:2000641)	1184	0.410928	0.625917	0	0	1.99324	1.77266	MAPK3
Fc Receptor Mediated Stimulatory Signaling Pathway (GO:0002431)	1185	0.410928	0.625917	0	0	1.99324	1.77266	VAV1
Regulation Of Epidermal Growth Factor-Activated Receptor Activity (GO:0007176)	1186	0.410928	0.625917	0	0	1.99324	1.77266	ZGPAT
Regulation Of Keratinocyte Differentiation (GO:0045616)	1187	0.410928	0.625917	0	0	1.99324	1.77266	MED1
Alternative mRNA Splicing, Via Spliceosome (GO:0000380)	1188	0.410928	0.625917	0	0	1.99324	1.77266	PUF60
Regulation Of Mitochondrial Fission (GO:0090140)	1189	0.410928	0.625917	0	0	1.99324	1.77266	MUL1
Regulation Of Nitric Oxide Biosynthetic Process (GO:0045428)	1190	0.410928	0.625917	0	0	1.99324	1.77266	KLF2
Branched-Chain Amino Acid Metabolic Process (GO:0009081)	1191	0.410928	0.625917	0	0	1.99324	1.77266	BCKDK
Regulation Of Protein Export From Nucleus (GO:0046825)	1192	0.410928	0.625917	0	0	1.99324	1.77266	FRAT2
Cellular Response To Hexose Stimulus (GO:0071331)	1193	0.410928	0.625917	0	0	1.99324	1.77266	PCK2
Regulation Of Transcription Involved In G1/S Transition Of Mitotic Cell Cycle (GO:0000083)	1194	0.410928	0.625917	0	0	1.99324	1.77266	HINFP
Cellular Response To Xenobiotic Stimulus (GO:0071466)	1195	0.410928	0.625917	0	0	1.99324	1.77266	VAV1
Release Of Cytochrome C From Mitochondria (GO:0001836)	1196	0.410928	0.625917	0	0	1.99324	1.77266	BCL2
Response To Hexose (GO:0009746)	1197	0.410928	0.625917	0	0	1.99324	1.77266	EIF2B1
Dendrite Morphogenesis (GO:0048813)	1198	0.410928	0.625917	0	0	1.99324	1.77266	MINK1
Ribosomal Small Subunit Assembly (GO:0000028)	1199	0.410928	0.625917	0	0	1.99324	1.77266	RRP7A
Embryonic Organ Morphogenesis (GO:0048562)	1200	0.410928	0.625917	0	0	1.99324	1.77266	POLR2D
Sulfur Compound Catabolic Process (GO:0044273)	1201	0.410928	0.625917	0	0	1.99324	1.77266	MLYCD
Heparan Sulfate Proteoglycan Biosynthetic Process (GO:0015012)	1202	0.410928	0.625917	0	0	1.99324	1.77266	EXTL3
Vesicle Docking (GO:0048278)	1203	0.410928	0.625917	0	0	1.99324	1.77266	STX16
Lipid Translocation (GO:0034204)	1204	0.410928	0.625917	0	0	1.99324	1.77266	ATP9B
mRNA Methylation (GO:0080009)	1205	0.410928	0.625917	0	0	1.99324	1.77266	TRMT10C
Melanosome Assembly (GO:1903232)	1206	0.410928	0.625917	0	0	1.99324	1.77266	HPS4
Negative Regulation Of T Cell Receptor Signaling Pathway (GO:0050860)	1207	0.410928	0.625917	0	0	1.99324	1.77266	PRNP
Negative Regulation Of Epithelial To Mesenchymal Transition (GO:0010719)	1208	0.410928	0.625917	0	0	1.99324	1.77266	SDHAF2
Negative Regulation Of Fibroblast Proliferation (GO:0048147)	1209	0.410928	0.625917	0	0	1.99324	1.77266	PARP10
Negative Regulation Of Protein Transport (GO:0051224)	1210	0.410928	0.625917	0	0	1.99324	1.77266	ERP29
Neuron Apoptotic Process (GO:0051402)	1211	0.410928	0.625917	0	0	1.99324	1.77266	BCL2
Neutral Amino Acid Transport (GO:0015804)	1212	0.410928	0.625917	0	0	1.99324	1.77266	SLC43A1
Plasma Membrane Repair (GO:0001778)	1213	0.410928	0.625917	0	0	1.99324	1.77266	CHMP7
Positive Regulation Of B Cell Proliferation (GO:0030890)	1214	0.410928	0.625917	0	0	1.99324	1.77266	BCL2
Positive Regulation Of ERBB Signaling Pathway (GO:1901186)	1215	0.410928	0.625917	0	0	1.99324	1.77266	RTN4
Positive Regulation Of Cell-Substrate Junction Organization (GO:0150117)	1216	0.410928	0.625917	0	0	1.99324	1.77266	ARF6
Positive Regulation Of Filopodium Assembly (GO:0051491)	1217	0.410928	0.625917	0	0	1.99324	1.77266	ARAP1
Positive Regulation Of Peptidyl-Threonine Phosphorylation (GO:0010800)	1218	0.410928	0.625917	0	0	1.99324	1.77266	RPTOR
Positive Regulation Of Protein Targeting To Membrane (GO:0090314)	1219	0.410928	0.625917	0	0	1.99324	1.77266	PRNP
Positive Regulation Of Translational Initiation (GO:0045948)	1220	0.410928	0.625917	0	0	1.99324	1.77266	YTHDF1
Protein Localization To Cell Surface (GO:0034394)	1221	0.410928	0.625917	0	0	1.99324	1.77266	ARF6
Purine Nucleotide Biosynthetic Process (GO:0006164)	1222	0.410928	0.625917	0	0	1.99324	1.77266	PRPSAP1
Purine-Containing Compound Biosynthetic Process (GO:0072522)	1223	0.410928	0.625917	0	0	1.99324	1.77266	PRPSAP1
rRNA Catabolic Process (GO:0016075)	1224	0.410928	0.625917	0	0	1.99324	1.77266	EXOSC6
Regulation Of DNA-templated DNA Replication (GO:0090329)	1225	0.410928	0.625917	0	0	1.99324	1.77266	MCM2
Regulation Of Cell Cycle Phase Transition (GO:1901987)	1226	0.410928	0.625917	0	0	1.99324	1.77266	CDKN1B
Ras Protein Signal Transduction (GO:0007265)	1227	0.411216	0.625917	0	0	1.2412	1.10297	GNA12;KRAS;GRAP;CRKL
Negative Regulation Of Protein Metabolic Process (GO:0051248)	1228	0.411216	0.625917	0	0	1.2412	1.10297	PRNP;RBM4;ILF3;TIA1
T Cell Receptor Signaling Pathway (GO:0050852)	1229	0.41126	0.625917	0	0	1.30882	1.16293	BTN3A1;EIF2B1;SPPL3
mRNA Metabolic Process (GO:0016071)	1230	0.41126	0.625917	0	0	1.30882	1.16293	ATXN2L;SF3A2;PCBP2
RNA Polymerase II Preinitiation Complex Assembly (GO:0051123)	1231	0.417965	0.631857	0	0	1.43146	1.24874	MED1;MED16
Retrograde Vesicle-Mediated Transport, Golgi To Endoplasmic Reticulum (GO:0006890)	1232	0.417965	0.631857	0	0	1.43146	1.24874	GOLPH3;ATP9B
Establishment Of Protein Localization To Mitochondrion (GO:0072655)	1233	0.417965	0.631857	0	0	1.43146	1.24874	AIP;DNLZ
Negative Regulation Of Supramolecular Fiber Organization (GO:1902904)	1234	0.417965	0.631857	0	0	1.43146	1.24874	LIMA1;MID1IP1
Macromolecule Biosynthetic Process (GO:0009059)	1235	0.41924	0.631857	0	0	1.16384	1.01174	GOLPH3;B4GAT1;TNIP1;EIF4EBP2;RPLP2;GTPBP1
Regulation Of Mitotic Cell Cycle Phase Transition (GO:1901990)	1236	0.420586	0.631857	0	0	1.28856	1.11603	SMARCC1;CDKN1B;ARID1B
Positive Regulation Of Protein Ubiquitination (GO:0031398)	1237	0.420586	0.631857	0	0	1.28856	1.11603	MTA1;UBE2L3;CENPS
DNA Damage Response (GO:0006974)	1238	0.422639	0.631857	0	0	1.09601	0.943924	RPTOR;USP47;VCPIP1;PARP4;MAPKAPK2;BCL2;RNF8;ZBTB1;KMT5B;CENPS;HINFP;MAPK3
Negative Regulation Of DNA-binding Transcription Factor Activity (GO:0043433)	1239	0.426874	0.631857	0	0	1.21397	1.03341	PARP10;PRNP;ERBIN;PEX14
Regulation Of Extrinsic Apoptotic Signaling Pathway (GO:2001236)	1240	0.430002	0.631857	0	0	1.39553	1.17778	RIPK1;RELA
Epithelial Cell Differentiation (GO:0030855)	1241	0.430002	0.631857	0	0	1.39553	1.17778	AKT2;PCK2
Sphingolipid Biosynthetic Process (GO:0030148)	1242	0.430002	0.631857	0	0	1.39553	1.17778	ST3GAL5;CSNK1G2
Sulfur Compound Biosynthetic Process (GO:0044272)	1243	0.430002	0.631857	0	0	1.39553	1.17778	B4GAT1;EXTL3
Fatty Acid Beta-Oxidation (GO:0006635)	1244	0.430002	0.631857	0	0	1.39553	1.17778	SLC25A17;SCP2
Negative Regulation Of Autophagy (GO:0010507)	1245	0.430002	0.631857	0	0	1.39553	1.17778	RPTOR;BCL2
Negative Regulation Of Innate Immune Response (GO:0045824)	1246	0.430002	0.631857	0	0	1.39553	1.17778	PCBP2;MUL1
Negative Regulation Of Neuron Death (GO:1901215)	1247	0.430002	0.631857	0	0	1.39553	1.17778	BCL2;RETREG1
Purine Ribonucleotide Metabolic Process (GO:0009150)	1248	0.430002	0.631857	0	0	1.39553	1.17778	MLYCD;GTPBP1
DNA Modification (GO:0006304)	1249	0.431364	0.631857	0	0	1.86017	1.56403	EXOSC6
RNA Destabilization (GO:0050779)	1250	0.431364	0.631857	0	0	1.86017	1.56403	YTHDF1
Regulation Of Interleukin-4 Production (GO:0032673)	1251	0.431364	0.631857	0	0	1.86017	1.56403	PRKCQ
Actin Filament Bundle Organization (GO:0061572)	1252	0.431364	0.631857	0	0	1.86017	1.56403	LIMA1
Bile Acid Metabolic Process (GO:0008206)	1253	0.431364	0.631857	0	0	1.86017	1.56403	SCP2
Branched-Chain Amino Acid Catabolic Process (GO:0009083)	1254	0.431364	0.631857	0	0	1.86017	1.56403	BCKDK
Regulation Of Supramolecular Fiber Organization (GO:1902903)	1255	0.431364	0.631857	0	0	1.86017	1.56403	PRUNE1
Regulation Of Telomere Maintenance Via Telomere Lengthening (GO:1904356)	1256	0.431364	0.631857	0	0	1.86017	1.56403	TNIP1
Embryonic Heart Tube Morphogenesis (GO:0003143)	1257	0.431364	0.631857	0	0	1.86017	1.56403	SRF
snRNA Processing (GO:0016180)	1258	0.431364	0.631857	0	0	1.86017	1.56403	TOE1
Establishment Of Epithelial Cell Polarity (GO:0090162)	1259	0.431364	0.631857	0	0	1.86017	1.56403	GOLPH3
Zinc Ion Transport (GO:0006829)	1260	0.431364	0.631857	0	0	1.86017	1.56403	SLC30A5
Keratinocyte Differentiation (GO:0030216)	1261	0.431364	0.631857	0	0	1.86017	1.56403	MED1
Learning (GO:0007612)	1262	0.431364	0.631857	0	0	1.86017	1.56403	YTHDF1
Liver Development (GO:0001889)	1263	0.431364	0.631857	0	0	1.86017	1.56403	PCK2
mRNA Cis Splicing, Via Spliceosome (GO:0045292)	1264	0.431364	0.631857	0	0	1.86017	1.56403	PSIP1
Microtubule Polymerization Or Depolymerization (GO:0031109)	1265	0.431364	0.631857	0	0	1.86017	1.56403	MAP7D3
Mitotic Cytokinetic Process (GO:1902410)	1266	0.431364	0.631857	0	0	1.86017	1.56403	CHMP7
Negative Regulation Of Notch Signaling Pathway (GO:0045746)	1267	0.431364	0.631857	0	0	1.86017	1.56403	RITA1
Negative Regulation Of Cytoskeleton Organization (GO:0051494)	1268	0.431364	0.631857	0	0	1.86017	1.56403	LIMA1
Negative Regulation Of Immune System Process (GO:0002683)	1269	0.431364	0.631857	0	0	1.86017	1.56403	MFHAS1
Negative Regulation Of Secretion By Cell (GO:1903531)	1270	0.431364	0.631857	0	0	1.86017	1.56403	ERP29
Nuclear-Transcribed mRNA Catabolic Process, Exonucleolytic (GO:0000291)	1271	0.431364	0.631857	0	0	1.86017	1.56403	EXOSC6
Pore Complex Assembly (GO:0046931)	1272	0.431364	0.631857	0	0	1.86017	1.56403	RTN4
Positive Regulation Of Chromosome Segregation (GO:0051984)	1273	0.431364	0.631857	0	0	1.86017	1.56403	NCAPH2
Positive Regulation Of Endopeptidase Activity (GO:0010950)	1274	0.431364	0.631857	0	0	1.86017	1.56403	VSIR
Protein Import Into Mitochondrial Matrix (GO:0030150)	1275	0.431364	0.631857	0	0	1.86017	1.56403	DNLZ
Protein Targeting To Peroxisome (GO:0006625)	1276	0.431364	0.631857	0	0	1.86017	1.56403	PEX14
rRNA Methylation (GO:0031167)	1277	0.431364	0.631857	0	0	1.86017	1.56403	FDXACB1
Regulation Of Cell Adhesion Mediated By Integrin (GO:0033628)	1278	0.431364	0.631857	0	0	1.86017	1.56403	PDE3B
DNA-templated Transcription (GO:0006351)	1279	0.437824	0.639732	0	0	1.13974	0.941357	XAB2;GTF3C2;POLR1C;POLR2D;MED16;GTF2F1
Positive Regulation Of Multicellular Organismal Process (GO:0051240)	1280	0.438097	0.639732	0	0	1.12347	0.927219	MED1;SMARCC1;BTN3A1;CARD9;GNAS;EHMT1;RTN4
DNA Replication (GO:0006260)	1281	0.439084	0.639732	0	0	1.24984	1.0287	GRWD1;REV1;MCM2
Establishment Of Protein Localization To Organelle (GO:0072594)	1282	0.439084	0.639732	0	0	1.24984	1.0287	IPO9;IPO7;IPO4
Negative Regulation Of Wnt Signaling Pathway (GO:0030178)	1283	0.439084	0.639732	0	0	1.24984	1.0287	SDHAF2;CHD8;AMFR
Anterograde Trans-Synaptic Signaling (GO:0098916)	1284	0.441907	0.639732	0	0	1.36136	1.11176	CNP;MINK1
Regulation Of Peptidyl-Tyrosine Phosphorylation (GO:0050730)	1285	0.441907	0.639732	0	0	1.36136	1.11176	PRNP;ITGA5
Integrin-Mediated Signaling Pathway (GO:0007229)	1286	0.441907	0.639732	0	0	1.36136	1.11176	ERBIN;ITGA5
Positive Regulation Of DNA Recombination (GO:0045911)	1287	0.441907	0.639732	0	0	1.36136	1.11176	MORF4L2;KMT5B
Positive Regulation Of Cysteine-Type Endopeptidase Activity (GO:2001056)	1288	0.441907	0.639732	0	0	1.36136	1.11176	CARD9;NOD1
Positive Regulation Of Peptidyl-Serine Phosphorylation (GO:0033138)	1289	0.441907	0.639732	0	0	1.36136	1.11176	RPTOR;ARAF
Positive Regulation Of Protein Binding (GO:0032092)	1290	0.441907	0.639732	0	0	1.36136	1.11176	AMFR;SPPL3
Golgi Organization (GO:0007030)	1291	0.442426	0.639732	0	0	1.1879	0.968714	VCPIP1;GOLPH3;SEC16A;PLEKHM2
Positive Regulation Of DNA Repair (GO:0045739)	1292	0.44825	0.639732	0	0	1.23134	0.988033	SMARCC1;RNF8;ARID1B
Regulation Of Cellular Component Organization (GO:0051128)	1293	0.450155	0.639732	0	0	1.17528	0.938066	RPTOR;PRKCQ;JADE2;MCM2
Transcription By RNA Polymerase II (GO:0006366)	1294	0.450156	0.639732	0	0	1.12422	0.897307	MED1;POLR2D;ZBTB1;GTF2F1;MED16;SUPT6H
Regulation Of Double-Strand Break Repair Via Nonhomologous End Joining (GO:2001032)	1295	0.451093	0.639732	0	0	1.74373	1.38815	KMT5B
Fc-gamma Receptor Signaling Pathway (GO:0038094)	1296	0.451093	0.639732	0	0	1.74373	1.38815	VAV1
Actin Filament Bundle Assembly (GO:0051017)	1297	0.451093	0.639732	0	0	1.74373	1.38815	LIMA1
Regulation Of Metal Ion Transport (GO:0010959)	1298	0.451093	0.639732	0	0	1.74373	1.38815	BCL2
Regulation Of Mitotic Spindle Assembly (GO:1901673)	1299	0.451093	0.639732	0	0	1.74373	1.38815	CHMP7
Cellular Nitrogen Compound Biosynthetic Process (GO:0044271)	1300	0.451093	0.639732	0	0	1.74373	1.38815	GCHFR
Transport Along Microtubule (GO:0010970)	1301	0.451093	0.639732	0	0	1.74373	1.38815	BORCS6
Leukocyte Cell-Cell Adhesion (GO:0007159)	1302	0.451093	0.639732	0	0	1.74373	1.38815	TNIP1
Mitochondrial Cytochrome C Oxidase Assembly (GO:0033617)	1303	0.451093	0.639732	0	0	1.74373	1.38815	SCO2
Monoatomic Anion Transport (GO:0006820)	1304	0.451093	0.639732	0	0	1.74373	1.38815	LRRC8D
Myeloid Cell Development (GO:0061515)	1305	0.451093	0.639732	0	0	1.74373	1.38815	MED1
Negative Regulation Of Antigen Receptor-Mediated Signaling Pathway (GO:0050858)	1306	0.451093	0.639732	0	0	1.74373	1.38815	PRNP
Negative Regulation Of Insulin Receptor Signaling Pathway (GO:0046627)	1307	0.451093	0.639732	0	0	1.74373	1.38815	PRKCQ
Negative Regulation Of Osteoblast Differentiation (GO:0045668)	1308	0.451093	0.639732	0	0	1.74373	1.38815	RIOX1
Negative Regulation Of Protein Localization To Nucleus (GO:1900181)	1309	0.451093	0.639732	0	0	1.74373	1.38815	MFHAS1
Negative Regulation Of Protein Secretion (GO:0050709)	1310	0.451093	0.639732	0	0	1.74373	1.38815	ERP29
Negative Regulation Of Tumor Necrosis Factor Production (GO:0032720)	1311	0.451093	0.639732	0	0	1.74373	1.38815	VSIR
Negative Regulation Of Tumor Necrosis Factor Superfamily Cytokine Production (GO:1903556)	1312	0.451093	0.639732	0	0	1.74373	1.38815	VSIR
Peroxisomal Membrane Transport (GO:0015919)	1313	0.451093	0.639732	0	0	1.74373	1.38815	PEX14
Phospholipid Dephosphorylation (GO:0046839)	1314	0.451093	0.639732	0	0	1.74373	1.38815	MTMR3
Positive Regulation Of Notch Signaling Pathway (GO:0045747)	1315	0.451093	0.639732	0	0	1.74373	1.38815	TSPAN14
Positive Regulation Of Cell-Cell Adhesion (GO:0022409)	1316	0.451093	0.639732	0	0	1.74373	1.38815	JAK1
Positive Regulation Of Glucose Transmembrane Transport (GO:0010828)	1317	0.451093	0.639732	0	0	1.74373	1.38815	AKT2
Positive Regulation Of Nitrogen Compound Metabolic Process (GO:0051173)	1318	0.451093	0.639732	0	0	1.74373	1.38815	KLF2
Positive Regulation Of Production Of Molecular Mediator Of Immune Response (GO:0002702)	1319	0.451093	0.639732	0	0	1.74373	1.38815	POLR2D
Regulation Of Activated T Cell Proliferation (GO:0046006)	1320	0.451093	0.639732	0	0	1.74373	1.38815	PRNP
tRNA Processing (GO:0008033)	1321	0.453673	0.641447	0	0	1.32881	1.05026	TRMT10C;TSEN54
Transcription Preinitiation Complex Assembly (GO:0070897)	1322	0.453673	0.641447	0	0	1.32881	1.05026	MED1;MED16
Negative Regulation Of Cellular Catabolic Process (GO:0031330)	1323	0.453673	0.641447	0	0	1.32881	1.05026	RPTOR;BCL2
Post-Translational Protein Modification (GO:0043687)	1324	0.453673	0.641447	0	0	1.32881	1.05026	PARP10;STT3B
Regulation Of Programmed Cell Death (GO:0043067)	1325	0.457296	0.643348	0	0	1.13466	0.887786	ACTN1;MORF4L2;RIPK1;RTN4;MCM2
Cellular Response To Organic Cyclic Compound (GO:0071407)	1326	0.457355	0.643348	0	0	1.21337	0.949216	MED1;GOLPH3;UBE2L3
Cellular Response To Lipid (GO:0071396)	1327	0.45785	0.643348	0	0	1.16292	0.90849	MED1;TNIP1;RELA;UBE2L3
Cytokine-Mediated Signaling Pathway (GO:0019221)	1328	0.45785	0.643348	0	0	1.16292	0.90849	RIPK1;RELA;JAK1;MAPK3
Peptidyl-Serine Modification (GO:0018209)	1329	0.464062	0.643348	0	0	1.1254	0.86401	AKT2;MAPKAPK2;MKNK2;PRKCQ;CSNK1G2
Positive Regulation Of Cell Differentiation (GO:0045597)	1330	0.464062	0.643348	0	0	1.1254	0.86401	RBM4;SMARCC1;SRF;TCF3;ARID1B
RNA Catabolic Process (GO:0006401)	1331	0.465297	0.643348	0	0	1.29778	0.992904	EXOSC6;PPP1R8
Regulation Of Mitotic Metaphase/Anaphase Transition (GO:0030071)	1332	0.465297	0.643348	0	0	1.29778	0.992904	SMARCC1;ARID1B
Response To Reactive Oxygen Species (GO:0000302)	1333	0.465297	0.643348	0	0	1.29778	0.992904	PEX14;MAPK3
Regulation Of MAP Kinase Activity (GO:0043405)	1334	0.465297	0.643348	0	0	1.29778	0.992904	ERP29;PIK3CB
Regulation Of Notch Signaling Pathway (GO:0008593)	1335	0.465297	0.643348	0	0	1.29778	0.992904	TSPAN14;RITA1
Mitotic Sister Chromatid Segregation (GO:0000070)	1336	0.465509	0.643348	0	0	1.15082	0.879943	NCAPH2;BCCIP;PHF13;CHMP7
Regulation Of mRNA Splicing, Via Spliceosome (GO:0048024)	1337	0.466396	0.643348	0	0	1.19592	0.912151	RBM4;TIA1;PUF60
Regulation Of Organelle Organization (GO:0033043)	1338	0.466396	0.643348	0	0	1.19592	0.912151	GOLPH3;MUL1;MAPK3
Histone Modification (GO:0016570)	1339	0.466396	0.643348	0	0	1.19592	0.912151	MTA1;MORF4L2;JADE2
Negative Regulation Of Cellular Process (GO:0048523)	1340	0.467468	0.643348	0	0	1.06258	0.808012	DNAJB2;RNF167;SMARCC1;CDKN1B;TP53I13;NME6;PDE3B;THAP12;MUL1;CHMP7;RTN4
Regulation Of Centriole Replication (GO:0046599)	1341	0.470139	0.643348	0	0	1.641	1.2385	CEP295
Regulation Of Glucose Import (GO:0046324)	1342	0.470139	0.643348	0	0	1.641	1.2385	AKT2
Regulation Of Microtubule Polymerization Or Depolymerization (GO:0031110)	1343	0.470139	0.643348	0	0	1.641	1.2385	PRUNE1
Regulation Of Necroptotic Process (GO:0060544)	1344	0.470139	0.643348	0	0	1.641	1.2385	RIPK1
Regulation Of Nervous System Development (GO:0051960)	1345	0.470139	0.643348	0	0	1.641	1.2385	PRUNE1
Carboxylic Acid Transport (GO:0046942)	1346	0.470139	0.643348	0	0	1.641	1.2385	SLC43A1
Cardiac Muscle Tissue Development (GO:0048738)	1347	0.470139	0.643348	0	0	1.641	1.2385	POLR2D
Regulation Of Protein Targeting To Membrane (GO:0090313)	1348	0.470139	0.643348	0	0	1.641	1.2385	PRNP
Endoplasmic Reticulum Calcium Ion Homeostasis (GO:0032469)	1349	0.470139	0.643348	0	0	1.641	1.2385	BCL2
Transition Metal Ion Transport (GO:0000041)	1350	0.470139	0.643348	0	0	1.641	1.2385	SLC30A5
Ventricular Septum Development (GO:0003281)	1351	0.470139	0.643348	0	0	1.641	1.2385	HECTD1
Monoatomic Anion Transmembrane Transport (GO:0098656)	1352	0.470139	0.643348	0	0	1.641	1.2385	LRRC8D
Multivesicular Body Sorting Pathway (GO:0071985)	1353	0.470139	0.643348	0	0	1.641	1.2385	CHMP7
Negative Regulation Of T Cell Activation (GO:0050868)	1354	0.470139	0.643348	0	0	1.641	1.2385	VSIR
Negative Regulation Of Cellular Response To Insulin Stimulus (GO:1900077)	1355	0.470139	0.643348	0	0	1.641	1.2385	PRKCQ
Negative Regulation Of Epidermal Growth Factor Receptor Signaling Pathway (GO:0042059)	1356	0.470139	0.643348	0	0	1.641	1.2385	ZGPAT
Negative Regulation Of Small Molecule Metabolic Process (GO:0062014)	1357	0.470139	0.643348	0	0	1.641	1.2385	BCKDK
Neural Crest Cell Development (GO:0014032)	1358	0.470139	0.643348	0	0	1.641	1.2385	TCOF1
Organelle Fission (GO:0048285)	1359	0.470139	0.643348	0	0	1.641	1.2385	MUL1
Peptidyl-Lysine Methylation (GO:0018022)	1360	0.470139	0.643348	0	0	1.641	1.2385	EHMT1
Phosphatidylinositol 3-Kinase Signaling (GO:0014065)	1361	0.470139	0.643348	0	0	1.641	1.2385	PIK3CB
Phospholipid Translocation (GO:0045332)	1362	0.470139	0.643348	0	0	1.641	1.2385	ATP9B
Positive Regulation Of Antigen Receptor-Mediated Signaling Pathway (GO:0050857)	1363	0.470139	0.643348	0	0	1.641	1.2385	RELA
Positive Regulation Of Extrinsic Apoptotic Signaling Pathway (GO:2001238)	1364	0.470139	0.643348	0	0	1.641	1.2385	RIPK1
Positive Regulation Of Leukocyte Chemotaxis (GO:0002690)	1365	0.470139	0.643348	0	0	1.641	1.2385	MAPK3
Positive Regulation Of Receptor-Mediated Endocytosis (GO:0048260)	1366	0.470139	0.643348	0	0	1.641	1.2385	TBC1D5
Protein Deacylation (GO:0035601)	1367	0.470139	0.643348	0	0	1.641	1.2385	ABHD17B
Purine Ribonucleoside Triphosphate Metabolic Process (GO:0009205)	1368	0.470139	0.643348	0	0	1.641	1.2385	GTPBP1
Cell-Matrix Adhesion (GO:0007160)	1369	0.476773	0.65005	0	0	1.26816	0.939342	PARVG;ITGA5
Regulation Of Stem Cell Population Maintenance (GO:2000036)	1370	0.476773	0.65005	0	0	1.26816	0.939342	SMARCC1;ELAVL1
Cellular Response To Hypoxia (GO:0071456)	1371	0.476773	0.65005	0	0	1.26816	0.939342	RPTOR;NDRG1
Cellular Response To Light Stimulus (GO:0071482)	1372	0.476773	0.65005	0	0	1.26816	0.939342	USP47;ZBTB1
Positive Regulation Of Peptidyl-Tyrosine Phosphorylation (GO:0050731)	1373	0.476773	0.65005	0	0	1.26816	0.939342	PRNP;ITGA5
mRNA Splicing, Via Spliceosome (GO:0000398)	1374	0.483179	0.651833	0	0	1.07322	0.780624	XAB2;RBM4;SF3A2;PUF60;GEMIN4;DHX38;CDK13
Regulation Of Double-Strand Break Repair (GO:2000779)	1375	0.484275	0.651833	0	0	1.16246	0.842907	SMARCC1;MORF4L2;ARID1B
B Cell Activation (GO:0042113)	1376	0.488099	0.651833	0	0	1.23985	0.889268	BCL2;TCF3
Activation Of Cysteine-Type Endopeptidase Activity Involved In Apoptotic Process (GO:0006919)	1377	0.488099	0.651833	0	0	1.23985	0.889268	MUL1;NOD1
Cellular Response To Decreased Oxygen Levels (GO:0036294)	1378	0.488099	0.651833	0	0	1.23985	0.889268	RPTOR;NDRG1
Extrinsic Apoptotic Signaling Pathway (GO:0097191)	1379	0.488099	0.651833	0	0	1.23985	0.889268	BCL2;RIPK1
Glucose Homeostasis (GO:0042593)	1380	0.488099	0.651833	0	0	1.23985	0.889268	POLR2D;LRRC8D
Positive Regulation Of Cold-Induced Thermogenesis (GO:0120162)	1381	0.488099	0.651833	0	0	1.23985	0.889268	GNAS;EHMT1
Positive Regulation Of Endothelial Cell Migration (GO:0010595)	1382	0.488099	0.651833	0	0	1.23985	0.889268	MAP2K3;PIK3CB
Positive Regulation Of Protein Transport (GO:0051222)	1383	0.488099	0.651833	0	0	1.23985	0.889268	GOLPH3;ARF6
Negative Regulation Of Macromolecule Metabolic Process (GO:0010605)	1384	0.488245	0.651833	0	0	1.11596	0.800071	PARP10;ERP29;CRKL;HINFP
L-alpha-amino Acid Transmembrane Transport (GO:1902475)	1385	0.488527	0.651833	0	0	1.54968	1.11013	SLC43A1
RNA Phosphodiester Bond Hydrolysis (GO:0090501)	1386	0.488527	0.651833	0	0	1.54968	1.11013	TOE1
RNA-templated DNA Biosynthetic Process (GO:0006278)	1387	0.488527	0.651833	0	0	1.54968	1.11013	DKC1
Amino Acid Transport (GO:0006865)	1388	0.488527	0.651833	0	0	1.54968	1.11013	SLC43A1
Regulation Of Protein Polymerization (GO:0032271)	1389	0.488527	0.651833	0	0	1.54968	1.11013	PRUNE1
Cellular Response To Epidermal Growth Factor Stimulus (GO:0071364)	1390	0.488527	0.651833	0	0	1.54968	1.11013	MED1
Cellular Response To Glucose Stimulus (GO:0071333)	1391	0.488527	0.651833	0	0	1.54968	1.11013	PCK2
Chaperone Cofactor-Dependent Protein Refolding (GO:0051085)	1392	0.488527	0.651833	0	0	1.54968	1.11013	ST13
Telomere Maintenance Via Telomerase (GO:0007004)	1393	0.488527	0.651833	0	0	1.54968	1.11013	DKC1
Type I Interferon-Mediated Signaling Pathway (GO:0060337)	1394	0.488527	0.651833	0	0	1.54968	1.11013	JAK1
Glycosphingolipid Metabolic Process (GO:0006687)	1395	0.488527	0.651833	0	0	1.54968	1.11013	ST3GAL5
Inositol Lipid-Mediated Signaling (GO:0048017)	1396	0.488527	0.651833	0	0	1.54968	1.11013	PI4KB
Lamellipodium Organization (GO:0097581)	1397	0.488527	0.651833	0	0	1.54968	1.11013	GOLPH3
Negative Regulation Of BMP Signaling Pathway (GO:0030514)	1398	0.488527	0.651833	0	0	1.54968	1.11013	SPART
Negative Regulation Of TORC1 Signaling (GO:1904262)	1399	0.488527	0.651833	0	0	1.54968	1.11013	RNF167
Positive Regulation Of JUN Kinase Activity (GO:0043507)	1400	0.488527	0.651833	0	0	1.54968	1.11013	MAP3K11
Positive Regulation Of Lymphocyte Activation (GO:0051251)	1401	0.488527	0.651833	0	0	1.54968	1.11013	PRKCQ
Receptor Signaling Pathway Via STAT (GO:0097696)	1402	0.488527	0.651833	0	0	1.54968	1.11013	JAK1
Regulation Of Cell-Cell Adhesion (GO:0022407)	1403	0.488527	0.651833	0	0	1.54968	1.11013	MINK1
Positive Regulation Of Cysteine-Type Endopeptidase Activity Involved In Apoptotic Process (GO:0043280)	1404	0.493106	0.657475	0	0	1.14643	0.810558	CARD9;MUL1;NOD1
Regulation Of Cell Cycle (GO:0051726)	1405	0.49556	0.659994	0	0	1.05274	0.739096	RNF167;PPM1A;CDKN1B;TP53I13;AKT2;MORF4L2;JADE2;MCM2
Ubiquitin-Dependent Protein Catabolic Process (GO:0006511)	1406	0.4984	0.659994	0	0	1.03671	0.721914	RNF167;FBXW5;HECTD1;MTA1;FEM1A;UBXN11;AMFR;PCBP2;RNF8;CHMP7;UBE2L3
Regulation Of Phosphorylation (GO:0042325)	1407	0.49927	0.659994	0	0	1.21278	0.842405	ANKLE2;CDKN1B
Mitochondrial Transport (GO:0006839)	1408	0.49927	0.659994	0	0	1.21278	0.842405	AIP;BCL2
Positive Regulation Of Response To Stimulus (GO:0048584)	1409	0.49927	0.659994	0	0	1.21278	0.842405	RNF8;EXTL3
Regulation Of Cellular Catabolic Process (GO:0031329)	1410	0.49927	0.659994	0	0	1.21278	0.842405	RPTOR;MTMR3
BMP Signaling Pathway (GO:0030509)	1411	0.506277	0.659994	0	0	1.46797	0.999202	MAPK3
DNA Replication Initiation (GO:0006270)	1412	0.506277	0.659994	0	0	1.46797	0.999202	MCM2
DNA Unwinding Involved In DNA Replication (GO:0006268)	1413	0.506277	0.659994	0	0	1.46797	0.999202	MCM2
Regulation Of Receptor Internalization (GO:0002090)	1414	0.506277	0.659994	0	0	1.46797	0.999202	TBC1D5
Cellular Defense Response (GO:0006968)	1415	0.506277	0.659994	0	0	1.46797	0.999202	RELA
Cellular Response To BMP Stimulus (GO:0071773)	1416	0.506277	0.659994	0	0	1.46797	0.999202	MAPK3
Cellular Response To Type I Interferon (GO:0071357)	1417	0.506277	0.659994	0	0	1.46797	0.999202	JAK1
Cholesterol Transport (GO:0030301)	1418	0.506277	0.659994	0	0	1.46797	0.999202	LIMA1
Renal System Development (GO:0072001)	1419	0.506277	0.659994	0	0	1.46797	0.999202	POLR2D
Response To Amino Acid (GO:0043200)	1420	0.506277	0.659994	0	0	1.46797	0.999202	RPTOR
Response To Estrogen (GO:0043627)	1421	0.506277	0.659994	0	0	1.46797	0.999202	ARID5A
Response To Nutrient Levels (GO:0031667)	1422	0.506277	0.659994	0	0	1.46797	0.999202	RPTOR
Ribosomal Large Subunit Assembly (GO:0000027)	1423	0.506277	0.659994	0	0	1.46797	0.999202	DHX30
Histone H2A Acetylation (GO:0043968)	1424	0.506277	0.659994	0	0	1.46797	0.999202	MORF4L2
Import Into Cell (GO:0098657)	1425	0.506277	0.659994	0	0	1.46797	0.999202	LRRC8D
Maturation Of 5.8S rRNA From Tricistronic rRNA Transcript (SSU-rRNA, 5.8S rRNA, LSU-rRNA) (GO:0000466)	1426	0.506277	0.659994	0	0	1.46797	0.999202	KRI1
Negative Regulation Of Microtubule Polymerization Or Depolymerization (GO:0031111)	1427	0.506277	0.659994	0	0	1.46797	0.999202	MID1IP1
Negative Regulation Of Proteolysis (GO:0045861)	1428	0.506277	0.659994	0	0	1.46797	0.999202	PRNP
Peroxisome Organization (GO:0007031)	1429	0.506277	0.659994	0	0	1.46797	0.999202	PEX14
Platelet Dense Granule Organization (GO:0060155)	1430	0.506277	0.659994	0	0	1.46797	0.999202	HPS4
Positive Regulation Of Erythrocyte Differentiation (GO:0045648)	1431	0.506277	0.659994	0	0	1.46797	0.999202	MED1
Positive Regulation Of Neuron Differentiation (GO:0045666)	1432	0.506277	0.659994	0	0	1.46797	0.999202	TCF3
Positive Regulation Of Peptidase Activity (GO:0010952)	1433	0.506277	0.659994	0	0	1.46797	0.999202	VSIR
Purine Ribonucleotide Catabolic Process (GO:0009154)	1434	0.506277	0.659994	0	0	1.46797	0.999202	MLYCD
Receptor Signaling Pathway Via JAK-STAT (GO:0007259)	1435	0.506277	0.659994	0	0	1.46797	0.999202	JAK1
Regulation Of Axon Extension (GO:0030516)	1436	0.506277	0.659994	0	0	1.46797	0.999202	RTN4
Regulation Of Interleukin-6 Production (GO:0032675)	1437	0.510284	0.662909	0	0	1.18685	0.798501	MAPKAPK2;CARD9
mRNA Transport (GO:0051028)	1438	0.510284	0.662909	0	0	1.18685	0.798501	CHTOP;MCM3AP
Positive Regulation Of Angiogenesis (GO:0045766)	1439	0.510284	0.662909	0	0	1.18685	0.798501	ITGA5;JAK1
Positive Regulation Of Metabolic Process (GO:0009893)	1440	0.510284	0.662909	0	0	1.18685	0.798501	GNAS;EHMT1
Positive Regulation Of Protein Serine/Threonine Kinase Activity (GO:0071902)	1441	0.510284	0.662909	0	0	1.18685	0.798501	RPTOR;ERP29
Cellular Response To Oxygen-Containing Compound (GO:1901701)	1442	0.516329	0.669741	0	0	1.03833	0.68635	RPTOR;CDKN1B;TNIP1;ADCY7;PEX14;RELA;MAPK3
Regulation Of Protein Serine/Threonine Kinase Activity (GO:0071900)	1443	0.519141	0.669741	0	0	1.10084	0.721689	RPTOR;CDKN1B;BCCIP
Protein Maturation (GO:0051604)	1444	0.519141	0.669741	0	0	1.10084	0.721689	TSPAN14;LMF2;AASDHPPT
Cellular Response To Salt (GO:1902075)	1445	0.521138	0.669741	0	0	1.16201	0.757329	CDKN1B;ADCY7
Regulation Of Viral Genome Replication (GO:0045069)	1446	0.521138	0.669741	0	0	1.16201	0.757329	ILF3;TNIP1
Fatty Acid Catabolic Process (GO:0009062)	1447	0.521138	0.669741	0	0	1.16201	0.757329	SLC25A17;SCP2
B Cell Receptor Signaling Pathway (GO:0050853)	1448	0.523414	0.669741	0	0	1.39443	0.902729	BCL2
Regulation Of Interleukin-10 Production (GO:0032653)	1449	0.523414	0.669741	0	0	1.39443	0.902729	VSIR
Bone Development (GO:0060348)	1450	0.523414	0.669741	0	0	1.39443	0.902729	GNAS
Ceramide Biosynthetic Process (GO:0046513)	1451	0.523414	0.669741	0	0	1.39443	0.902729	ST3GAL5
Respiratory Chain Complex IV Assembly (GO:0008535)	1452	0.523414	0.669741	0	0	1.39443	0.902729	SCO2
Response To Transforming Growth Factor Beta (GO:0071559)	1453	0.523414	0.669741	0	0	1.39443	0.902729	CRKL
Secondary Alcohol Biosynthetic Process (GO:1902653)	1454	0.523414	0.669741	0	0	1.39443	0.902729	INSIG2
Sprouting Angiogenesis (GO:0002040)	1455	0.523414	0.669741	0	0	1.39443	0.902729	SRF
Stem Cell Differentiation (GO:0048863)	1456	0.523414	0.669741	0	0	1.39443	0.902729	NELFB
Mitotic G1 DNA Damage Checkpoint Signaling (GO:0031571)	1457	0.523414	0.669741	0	0	1.39443	0.902729	CDKN1B
Monocarboxylic Acid Transport (GO:0015718)	1458	0.523414	0.669741	0	0	1.39443	0.902729	SLC25A17
Nuclear Membrane Reassembly (GO:0031468)	1459	0.523414	0.669741	0	0	1.39443	0.902729	CHMP7
Organic Hydroxy Compound Biosynthetic Process (GO:1901617)	1460	0.523414	0.669741	0	0	1.39443	0.902729	SCP2
Phosphatidic Acid Biosynthetic Process (GO:0006654)	1461	0.523414	0.669741	0	0	1.39443	0.902729	AGPAT3
Positive Regulation Of Ubiquitin-Protein Transferase Activity (GO:0051443)	1462	0.523414	0.669741	0	0	1.39443	0.902729	UBE2L3
Protein Export From Nucleus (GO:0006611)	1463	0.523414	0.669741	0	0	1.39443	0.902729	XPO6
Intrinsic Apoptotic Signaling Pathway (GO:0097193)	1464	0.527658	0.674249	0	0	1.08643	0.694566	CUL2;BCL2;QRICH1
Mitochondrial Respiratory Chain Complex Assembly (GO:0033108)	1465	0.527658	0.674249	0	0	1.08643	0.694566	SDHAF2;DMAC1;SCO2
DNA Metabolic Process (GO:0006259)	1466	0.530343	0.677218	0	0	1.01578	0.644239	PARP4;GRWD1;REV1;ZBTB1;KMT5B;DCTPP1;HINFP;CENPS;MCM2
Positive Regulation Of Cell Population Proliferation (GO:0008284)	1467	0.531348	0.67727	0	0	1.01837	0.643953	MAP3K3;SMARCC1;AKT2;BCL2;KRAS;TMEM250;RELA;CRKL
Regulation Of Defense Response (GO:0031347)	1468	0.531831	0.67727	0	0	1.13818	0.718683	AKNA;RELA
Spliceosomal Complex Assembly (GO:0000245)	1469	0.531831	0.67727	0	0	1.13818	0.718683	SF3A2;PUF60
Protein Lipidation (GO:0006497)	1470	0.531831	0.67727	0	0	1.13818	0.718683	ATG16L2;SLC30A5
Endocytosis (GO:0006897)	1471	0.532463	0.677615	0	0	1.05215	0.663109	PI4KB;ATP9B;CSNK1G2;MAPK3
GPI Anchor Metabolic Process (GO:0006505)	1472	0.539957	0.679758	0	0	1.32789	0.818336	SLC30A5
Regulation Of Protein Modification By Small Protein Conjugation Or Removal (GO:1903320)	1473	0.539957	0.679758	0	0	1.32789	0.818336	DNAJB2
Cholesterol Biosynthetic Process (GO:0006695)	1474	0.539957	0.679758	0	0	1.32789	0.818336	INSIG2
Substrate Adhesion-Dependent Cell Spreading (GO:0034446)	1475	0.539957	0.679758	0	0	1.32789	0.818336	PARVG
Extrinsic Apoptotic Signaling Pathway Via Death Domain Receptors (GO:0008625)	1476	0.539957	0.679758	0	0	1.32789	0.818336	BCL2
Membrane Assembly (GO:0071709)	1477	0.539957	0.679758	0	0	1.32789	0.818336	CHMP7
Negative Regulation Of Cell-Cell Adhesion (GO:0022408)	1478	0.539957	0.679758	0	0	1.32789	0.818336	AKNA
Negative Regulation Of Peptidyl-Tyrosine Phosphorylation (GO:0050732)	1479	0.539957	0.679758	0	0	1.32789	0.818336	SH3BP5L
Negative Regulation Of Transport (GO:0051051)	1480	0.539957	0.679758	0	0	1.32789	0.818336	YRDC
Phosphatidic Acid Metabolic Process (GO:0046473)	1481	0.539957	0.679758	0	0	1.32789	0.818336	AGPAT3
Positive Regulation Of Mitotic Cell Cycle (GO:0045931)	1482	0.539957	0.679758	0	0	1.32789	0.818336	USP22
Positive Regulation Of Organelle Organization (GO:0010638)	1483	0.539957	0.679758	0	0	1.32789	0.818336	AKT2
Positive Regulation Of Proteolysis Involved In Protein Catabolic Process (GO:1903052)	1484	0.539957	0.679758	0	0	1.32789	0.818336	CCDC22
Protein Exit From Endoplasmic Reticulum (GO:0032527)	1485	0.539957	0.679758	0	0	1.32789	0.818336	SEC16A
Proteoglycan Biosynthetic Process (GO:0030166)	1486	0.539957	0.679758	0	0	1.32789	0.818336	EXTL3
Regulation Of B Cell Proliferation (GO:0030888)	1487	0.539957	0.679758	0	0	1.32789	0.818336	BCL2
DNA-templated Transcription Initiation (GO:0006352)	1488	0.542359	0.681407	0	0	1.11531	0.682375	POLR2D;GTF2F1
Regulation Of Vesicle-Mediated Transport (GO:0060627)	1489	0.542359	0.681407	0	0	1.11531	0.682375	BET1L;MAPK3
Microtubule Cytoskeleton Organization Involved In Mitosis (GO:1902850)	1490	0.542359	0.681407	0	0	1.11531	0.682375	FAM110A;BCCIP
Protein Transport (GO:0015031)	1491	0.546402	0.686026	0	0	1.0043	0.606998	ARFRP1;GOLPH3;STX16;RAB35;CMTM6;ERP29;SCAMP2;ARF6
Protein Ubiquitination (GO:0016567)	1492	0.550287	0.687837	0	0	0.995088	0.59438	RNF167;VCPIP1;FBXW5;AMFR;CUL2;BCL2;MSL2;RNF8;MUL1;FAAP100;UBE2L3
Cellular Response To Molecule Of Bacterial Origin (GO:0071219)	1493	0.552723	0.687837	0	0	1.09333	0.648233	TNIP1;RELA
Endomembrane System Organization (GO:0010256)	1494	0.555494	0.687837	0	0	1.0098	0.593657	CTDNEP1;GOLPH3;SYNGR2;SEC16A;PLEKHM2
Regulation Of Cellular Senescence (GO:2000772)	1495	0.555928	0.687837	0	0	1.26741	0.744117	MAP3K3
U2-type Prespliceosome Assembly (GO:1903241)	1496	0.555928	0.687837	0	0	1.26741	0.744117	SF3A2
Amino Acid Catabolic Process (GO:0009063)	1497	0.555928	0.687837	0	0	1.26741	0.744117	BCKDK
Secretory Granule Organization (GO:0033363)	1498	0.555928	0.687837	0	0	1.26741	0.744117	HPS4
Epidermal Cell Differentiation (GO:0009913)	1499	0.555928	0.687837	0	0	1.26741	0.744117	MED1
Steroid Biosynthetic Process (GO:0006694)	1500	0.555928	0.687837	0	0	1.26741	0.744117	SCP2
Sterol Biosynthetic Process (GO:0016126)	1501	0.555928	0.687837	0	0	1.26741	0.744117	INSIG2
Telomere Maintenance Via Telomere Lengthening (GO:0010833)	1502	0.555928	0.687837	0	0	1.26741	0.744117	DKC1
Integrated Stress Response Signaling (GO:0140467)	1503	0.555928	0.687837	0	0	1.26741	0.744117	QRICH1
ncRNA Catabolic Process (GO:0034661)	1504	0.555928	0.687837	0	0	1.26741	0.744117	EXOSC6
Negative Regulation Of Hydrolase Activity (GO:0051346)	1505	0.555928	0.687837	0	0	1.26741	0.744117	GCHFR
Negative Regulation Of Mitochondrion Organization (GO:0010823)	1506	0.555928	0.687837	0	0	1.26741	0.744117	MUL1
Positive Regulation Of Actin Filament Polymerization (GO:0030838)	1507	0.555928	0.687837	0	0	1.26741	0.744117	ARF6
Positive Regulation Of Biosynthetic Process (GO:0009891)	1508	0.555928	0.687837	0	0	1.26741	0.744117	RPTOR
Positive Regulation Of Phosphatidylinositol 3-Kinase Signaling (GO:0014068)	1509	0.555928	0.687837	0	0	1.26741	0.744117	EXTL3
Positive Regulation Of Reactive Oxygen Species Metabolic Process (GO:2000379)	1510	0.555928	0.687837	0	0	1.26741	0.744117	RIPK1
Positive Regulation Of Substrate Adhesion-Dependent Cell Spreading (GO:1900026)	1511	0.555928	0.687837	0	0	1.26741	0.744117	CRKL
Protein Insertion Into ER Membrane (GO:0045048)	1512	0.555928	0.687837	0	0	1.26741	0.744117	TMEM147
Protein Quality Control For Misfolded Or Incompletely Synthesized Proteins (GO:0006515)	1513	0.555928	0.687837	0	0	1.26741	0.744117	ZER1
Regulation Of RNA Splicing (GO:0043484)	1514	0.560868	0.69349	0	0	1.03237	0.596988	TIA1;USP22;MCM2
Intracellular Calcium Ion Homeostasis (GO:0006874)	1515	0.56292	0.694651	0	0	1.0722	0.616103	STIM2;BCL2
Negative Regulation Of MAPK Cascade (GO:0043409)	1516	0.56292	0.694651	0	0	1.0722	0.616103	TNIP1;PIK3CB
Protein Targeting To Mitochondrion (GO:0006626)	1517	0.56292	0.694651	0	0	1.0722	0.616103	AIP;DNLZ
Negative Regulation Of Gene Expression (GO:0010629)	1518	0.564538	0.69497	0	0	0.989992	0.566025	PARP10;RBM4;ILF3;TIA1;ERP29;CRKL;HINFP
Organelle Assembly (GO:0070925)	1519	0.566169	0.69497	0	0	0.986122	0.560968	YTHDF1;ATG16L2;RAB35;HPS4;B9D2;TMEM250;CHMP7;UBQLN2
Regulation Of Macromolecule Metabolic Process (GO:0060255)	1520	0.568947	0.69497	0	0	1.01968	0.575064	MTMR3;PCBP2;HINFP
Response To Endoplasmic Reticulum Stress (GO:0034976)	1521	0.568947	0.69497	0	0	1.01968	0.575064	SEC16A;BCL2;QRICH1
'De Novo' Post-Translational Protein Folding (GO:0051084)	1522	0.571345	0.69497	0	0	1.21218	0.678533	ST13
Regulation Of Chromosome Segregation (GO:0051983)	1523	0.571345	0.69497	0	0	1.21218	0.678533	NCAPH2
Regulation Of Defense Response To Virus By Host (GO:0050691)	1524	0.571345	0.69497	0	0	1.21218	0.678533	MUL1
Regulation Of Epithelial Cell Migration (GO:0010632)	1525	0.571345	0.69497	0	0	1.21218	0.678533	RTN4
Regulation Of Peptidyl-Threonine Phosphorylation (GO:0010799)	1526	0.571345	0.69497	0	0	1.21218	0.678533	RPTOR
Response To Retinoic Acid (GO:0032526)	1527	0.571345	0.69497	0	0	1.21218	0.678533	POLR2D
Epidermal Growth Factor Receptor Signaling Pathway (GO:0007173)	1528	0.571345	0.69497	0	0	1.21218	0.678533	ERBIN
Establishment Of Protein Localization To Extracellular Region (GO:0035592)	1529	0.571345	0.69497	0	0	1.21218	0.678533	GOLPH3
Gland Development (GO:0048732)	1530	0.571345	0.69497	0	0	1.21218	0.678533	ZBTB1
Zymogen Activation (GO:0031638)	1531	0.571345	0.69497	0	0	1.21218	0.678533	VSIR
miRNA-mediated Gene Silencing (GO:0035195)	1532	0.571345	0.69497	0	0	1.21218	0.678533	RBM4
Negative Regulation Of ERK1 And ERK2 Cascade (GO:0070373)	1533	0.571345	0.69497	0	0	1.21218	0.678533	TNIP1
Negative Regulation Of G2/M Transition Of Mitotic Cell Cycle (GO:0010972)	1534	0.571345	0.69497	0	0	1.21218	0.678533	USP47
Nuclear Membrane Organization (GO:0071763)	1535	0.571345	0.69497	0	0	1.21218	0.678533	CHMP7
Phosphatidylcholine Metabolic Process (GO:0046470)	1536	0.571345	0.69497	0	0	1.21218	0.678533	PNPLA8
Positive Regulation Of T Cell Mediated Immunity (GO:0002711)	1537	0.571345	0.69497	0	0	1.21218	0.678533	ZBTB1
Positive Regulation Of TORC1 Signaling (GO:1904263)	1538	0.571345	0.69497	0	0	1.21218	0.678533	RNF167
Positive Regulation Of Myeloid Leukocyte Differentiation (GO:0002763)	1539	0.571345	0.69497	0	0	1.21218	0.678533	RIPK1
Regulation Of Peptidyl-Serine Phosphorylation (GO:0033135)	1540	0.572949	0.696016	0	0	1.05186	0.585842	RPTOR;ARAF
Histone Acetylation (GO:0016573)	1541	0.572949	0.696016	0	0	1.05186	0.585842	MORF4L2;USP22
RNA Export From Nucleus (GO:0006405)	1542	0.582811	0.703475	0	0	1.03228	0.557319	CHTOP;MCM3AP
Negative Regulation Of Protein Kinase Activity (GO:0006469)	1543	0.582811	0.703475	0	0	1.03228	0.557319	CDKN1B;SH3BP5L
Regulation Of Cell Motility (GO:2000145)	1544	0.582811	0.703475	0	0	1.03228	0.557319	AKT2;MINK1
Amide Biosynthetic Process (GO:0043604)	1545	0.586229	0.703475	0	0	1.16156	0.620325	GLUD1
Regulation Of Microtubule-Based Process (GO:0032886)	1546	0.586229	0.703475	0	0	1.16156	0.620325	MCM2
Regulation Of Type I Interferon-Mediated Signaling Pathway (GO:0060338)	1547	0.586229	0.703475	0	0	1.16156	0.620325	MUL1
Skin Development (GO:0043588)	1548	0.586229	0.703475	0	0	1.16156	0.620325	MED1
Interferon-Mediated Signaling Pathway (GO:0140888)	1549	0.586229	0.703475	0	0	1.16156	0.620325	JAK1
Negative Regulation Of Cell Cycle Process (GO:0010948)	1550	0.586229	0.703475	0	0	1.16156	0.620325	NME6
Negative Regulation Of mRNA Catabolic Process (GO:1902373)	1551	0.586229	0.703475	0	0	1.16156	0.620325	ELAVL1
Neurogenesis (GO:0022008)	1552	0.586229	0.703475	0	0	1.16156	0.620325	RITA1
Nuclear-Transcribed mRNA Catabolic Process, Nonsense-Mediated Decay (GO:0000184)	1553	0.586229	0.703475	0	0	1.16156	0.620325	SMG9
Positive Regulation Of Ras Protein Signal Transduction (GO:0046579)	1554	0.586229	0.703475	0	0	1.16156	0.620325	PIK3CB
Positive Regulation Of Myeloid Cell Differentiation (GO:0045639)	1555	0.586229	0.703475	0	0	1.16156	0.620325	MED1
Protein Localization To Golgi Apparatus (GO:0034067)	1556	0.586229	0.703475	0	0	1.16156	0.620325	GOLPH3
Purine Nucleotide Metabolic Process (GO:0006163)	1557	0.586229	0.703475	0	0	1.16156	0.620325	PRPSAP1
Regulated Exocytosis (GO:0045055)	1558	0.586229	0.703475	0	0	1.16156	0.620325	SYNGR2
Regulation Of JUN Kinase Activity (GO:0043506)	1559	0.586229	0.703475	0	0	1.16156	0.620325	MAP3K11
Regulation Of Cell Development (GO:0060284)	1560	0.586229	0.703475	0	0	1.16156	0.620325	PRUNE1
Vesicle Fusion (GO:0006906)	1561	0.592504	0.709797	0	0	1.01341	0.530415	STX16;CHMP7
Regulation Of Protein Ubiquitination (GO:0031396)	1562	0.592631	0.709797	0	0	0.983391	0.514495	DNAJB2;UBE2L3;CENPS
GPI Anchor Biosynthetic Process (GO:0006506)	1563	0.600598	0.709797	0	0	1.11499	0.568453	SLC30A5
O-glycan Processing (GO:0016266)	1564	0.600598	0.709797	0	0	1.11499	0.568453	B4GAT1
Regulation Of Intracellular Transport (GO:0032386)	1565	0.600598	0.709797	0	0	1.11499	0.568453	RBM4
Regulation Of Monoatomic Ion Transmembrane Transporter Activity (GO:0032412)	1566	0.600598	0.709797	0	0	1.11499	0.568453	MINK1
Apoptotic Mitochondrial Changes (GO:0008637)	1567	0.600598	0.709797	0	0	1.11499	0.568453	BCL2
Regulation Of Phosphoprotein Phosphatase Activity (GO:0043666)	1568	0.600598	0.709797	0	0	1.11499	0.568453	GNA12
Regulation Of Spindle Assembly (GO:0090169)	1569	0.600598	0.709797	0	0	1.11499	0.568453	CHMP7
Cellular Response To Type II Interferon (GO:0071346)	1570	0.600598	0.709797	0	0	1.11499	0.568453	JAK1
Cytoplasmic Translational Initiation (GO:0002183)	1571	0.600598	0.709797	0	0	1.11499	0.568453	RBM4
Signal Transduction By P53 Class Mediator (GO:0072331)	1572	0.600598	0.709797	0	0	1.11499	0.568453	NDRG1
Steroid Metabolic Process (GO:0008202)	1573	0.600598	0.709797	0	0	1.11499	0.568453	SCP2
Transcription By RNA Polymerase III (GO:0006383)	1574	0.600598	0.709797	0	0	1.11499	0.568453	GTF3C2
Transcription Initiation-Coupled Chromatin Remodeling (GO:0045815)	1575	0.600598	0.709797	0	0	1.11499	0.568453	ARID1B
Microtubule Polymerization (GO:0046785)	1576	0.600598	0.709797	0	0	1.11499	0.568453	MAP7D3
Mitochondrial Membrane Organization (GO:0007006)	1577	0.600598	0.709797	0	0	1.11499	0.568453	BCL2
Monoubiquitinated Histone H2A Deubiquitination (GO:0035522)	1578	0.600598	0.709797	0	0	1.11499	0.568453	USP22
Monoubiquitinated Histone Deubiquitination (GO:0035521)	1579	0.600598	0.709797	0	0	1.11499	0.568453	USP22
Negative Regulation Of Cell Projection Organization (GO:0031345)	1580	0.600598	0.709797	0	0	1.11499	0.568453	PRNP
Positive Regulation Of G1/S Transition Of Mitotic Cell Cycle (GO:1900087)	1581	0.600598	0.709797	0	0	1.11499	0.568453	RPTOR
Positive Regulation Of RNA Metabolic Process (GO:0051254)	1582	0.600598	0.709797	0	0	1.11499	0.568453	RELA
Positive Regulation Of Transport (GO:0051050)	1583	0.600598	0.709797	0	0	1.11499	0.568453	AKT2
Regulation Of DNA Recombination (GO:0000018)	1584	0.600598	0.709797	0	0	1.11499	0.568453	SUPT6H
Nervous System Development (GO:0007399)	1585	0.601806	0.710143	0	0	0.954673	0.484803	DHX30;ANKLE2;ZMYND8;MAMDC2;RITA1;SLC2A1
Regulation Of Autophagy (GO:0010506)	1586	0.601806	0.710143	0	0	0.954673	0.484803	RPTOR;MTMR3;USP20;BCL2;PIK3CB;UBQLN2
Hemopoiesis (GO:0030097)	1587	0.602029	0.710143	0	0	0.995211	0.50502	MKNK2;CDK13
Non-Membrane-Bounded Organelle Assembly (GO:0140694)	1588	0.607945	0.716565	0	0	0.960591	0.478058	ATXN2L;TIA1;YTHDF1
Defense Response To Virus (GO:0051607)	1589	0.608238	0.716565	0	0	0.952175	0.473411	SENP7;USP20;BCL2;RELA
Cytoskeleton-Dependent Cytokinesis (GO:0061640)	1590	0.611384	0.717135	0	0	0.977654	0.481034	RAB35;TMEM250
Regulation Of Erythrocyte Differentiation (GO:0045646)	1591	0.614468	0.717135	0	0	1.07199	0.522059	MED1
Regulation Of Glycolytic Process (GO:0006110)	1592	0.614468	0.717135	0	0	1.07199	0.522059	RPTOR
Regulation Of Insulin Receptor Signaling Pathway (GO:0046626)	1593	0.614468	0.717135	0	0	1.07199	0.522059	PRKCQ
Cellular Response To Amino Acid Stimulus (GO:0071230)	1594	0.614468	0.717135	0	0	1.07199	0.522059	RPTOR
Response To Organic Cyclic Compound (GO:0014070)	1595	0.614468	0.717135	0	0	1.07199	0.522059	TP53I13
Establishment Or Maintenance Of Epithelial Cell Apical/Basal Polarity (GO:0045197)	1596	0.614468	0.717135	0	0	1.07199	0.522059	ERBIN
intra-Golgi Vesicle-Mediated Transport (GO:0006891)	1597	0.614468	0.717135	0	0	1.07199	0.522059	TRAPPC10
Melanosome Organization (GO:0032438)	1598	0.614468	0.717135	0	0	1.07199	0.522059	HPS4
Negative Regulation Of Mitotic Cell Cycle Phase Transition (GO:1901991)	1599	0.614468	0.717135	0	0	1.07199	0.522059	USP47
Phospholipid Metabolic Process (GO:0006644)	1600	0.614468	0.717135	0	0	1.07199	0.522059	AGPAT3
Positive Regulation Of Cytokine-Mediated Signaling Pathway (GO:0001961)	1601	0.614468	0.717135	0	0	1.07199	0.522059	RIPK1
Protein K63-linked Deubiquitination (GO:0070536)	1602	0.614468	0.717135	0	0	1.07199	0.522059	USP20
Regulation Of G2/M Transition Of Mitotic Cell Cycle (GO:0010389)	1603	0.614468	0.717135	0	0	1.07199	0.522059	USP47
Regulation Of Blood Vessel Endothelial Cell Migration (GO:0043535)	1604	0.614468	0.717135	0	0	1.07199	0.522059	MAP2K3
Cellular Response To UV (GO:0034644)	1605	0.620572	0.721559	0	0	0.960701	0.458364	USP47;ZBTB1
Cellular Response To Lipopolysaccharide (GO:0071222)	1606	0.620572	0.721559	0	0	0.960701	0.458364	TNIP1;RELA
Response To Ionizing Radiation (GO:0010212)	1607	0.620572	0.721559	0	0	0.960701	0.458364	MTA1;RNF8
Negative Regulation Of Transmembrane Receptor Protein Serine/Threonine Kinase Signaling Pathway (GO:0090101)	1608	0.620572	0.721559	0	0	0.960701	0.458364	SPART;PPM1A
Positive Regulation Of Protein Localization To Nucleus (GO:1900182)	1609	0.620572	0.721559	0	0	0.960701	0.458364	DKC1;JAK1
Protein K48-linked Ubiquitination (GO:0070936)	1610	0.620572	0.721559	0	0	0.960701	0.458364	UBE2E3;RNF8
Transmembrane Receptor Protein Tyrosine Kinase Signaling Pathway (GO:0007169)	1611	0.621185	0.721824	0	0	0.935983	0.445646	AKT2;MAPKAPK2;PIK3CB;VAV1
Regulation Of MAPK Cascade (GO:0043408)	1612	0.622873	0.722848	0	0	0.938816	0.444447	MINK1;GRAP;MAPK3
RNA Processing (GO:0006396)	1613	0.627336	0.722848	0	0	0.927887	0.432649	RBM4;EXOSC6;SF3A2;DKC1;ZNF830
Regulation Of Microtubule Polymerization (GO:0031113)	1614	0.627859	0.722848	0	0	1.03219	0.480422	PRUNE1
Cellular Response To Virus (GO:0098586)	1615	0.627859	0.722848	0	0	1.03219	0.480422	JAK1
Sensory Perception Of Mechanical Stimulus (GO:0050954)	1616	0.627859	0.722848	0	0	1.03219	0.480422	GRAP
Sensory Perception Of Sound (GO:0007605)	1617	0.627859	0.722848	0	0	1.03219	0.480422	GRAP
Intracellular Steroid Hormone Receptor Signaling Pathway (GO:0030518)	1618	0.627859	0.722848	0	0	1.03219	0.480422	MED1
Multivesicular Body Assembly (GO:0036258)	1619	0.627859	0.722848	0	0	1.03219	0.480422	CHMP7
Negative Regulation Of MAP Kinase Activity (GO:0043407)	1620	0.627859	0.722848	0	0	1.03219	0.480422	PIK3CB
Negative Regulation Of Blood Vessel Morphogenesis (GO:2000181)	1621	0.627859	0.722848	0	0	1.03219	0.480422	PDE3B
Negative Regulation Of Epithelial Cell Proliferation (GO:0050680)	1622	0.627859	0.722848	0	0	1.03219	0.480422	MED1
Nucleic Acid-Templated Transcription (GO:0097659)	1623	0.627859	0.722848	0	0	1.03219	0.480422	XAB2
Nucleosome Assembly (GO:0006334)	1624	0.627859	0.722848	0	0	1.03219	0.480422	GRWD1
Purine Ribonucleotide Biosynthetic Process (GO:0009152)	1625	0.627859	0.722848	0	0	1.03219	0.480422	ADCY7
Pyruvate Metabolic Process (GO:0006090)	1626	0.627859	0.722848	0	0	1.03219	0.480422	PCK2
Regulation Of Innate Immune Response (GO:0045088)	1627	0.629591	0.723753	0	0	0.944323	0.436924	PCBP2;MUL1
Negative Regulation Of Developmental Process (GO:0051093)	1628	0.629591	0.723753	0	0	0.944323	0.436924	SMARCC1;MUL1
Regulation Of Cellular Response To Stress (GO:0080135)	1629	0.630191	0.723753	0	0	0.928291	0.428623	AMFR;USP22;MAPKAPK2
Positive Regulation Of Protein Kinase Activity (GO:0045860)	1630	0.630191	0.723753	0	0	0.928291	0.428623	MAP2K3;RPTOR;PRNP
ERBB Signaling Pathway (GO:0038127)	1631	0.640785	0.729653	0	0	0.995225	0.442936	ERBIN
Regulation Of Fibroblast Proliferation (GO:0048145)	1632	0.640785	0.729653	0	0	0.995225	0.442936	PARP10
RNA 3'-End Processing (GO:0031123)	1633	0.640785	0.729653	0	0	0.995225	0.442936	TOE1
Regulation Of Interleukin-2 Production (GO:0032663)	1634	0.640785	0.729653	0	0	0.995225	0.442936	PRNP
Regulation Of Lipid Metabolic Process (GO:0019216)	1635	0.640785	0.729653	0	0	0.995225	0.442936	MID1IP1
Calcium Ion Homeostasis (GO:0055074)	1636	0.640785	0.729653	0	0	0.995225	0.442936	STIM2
Embryonic Organ Development (GO:0048568)	1637	0.640785	0.729653	0	0	0.995225	0.442936	POLR2D
Hexose Metabolic Process (GO:0019318)	1638	0.640785	0.729653	0	0	0.995225	0.442936	PMM2
Insulin Receptor Signaling Pathway (GO:0008286)	1639	0.640785	0.729653	0	0	0.995225	0.442936	AKT2
Multivesicular Body Organization (GO:0036257)	1640	0.640785	0.729653	0	0	0.995225	0.442936	CHMP7
Negative Regulation Of Cell Adhesion (GO:0007162)	1641	0.640785	0.729653	0	0	0.995225	0.442936	PDE3B
Negative Regulation Of Cysteine-Type Endopeptidase Activity (GO:2000117)	1642	0.640785	0.729653	0	0	0.995225	0.442936	USP47
Plasma Membrane Bounded Cell Projection Morphogenesis (GO:0120039)	1643	0.640785	0.729653	0	0	0.995225	0.442936	MINK1
Positive Regulation Of Cellular Metabolic Process (GO:0031325)	1644	0.640785	0.729653	0	0	0.995225	0.442936	RIPK1
Cellular Response To Starvation (GO:0009267)	1645	0.64453	0.733471	0	0	0.907928	0.398793	RPTOR;MTMR3;MAPK3
Chemical Synaptic Transmission (GO:0007268)	1646	0.647128	0.735534	0	0	0.913179	0.397425	CNP;MINK1
Positive Regulation Of Binding (GO:0051099)	1647	0.647128	0.735534	0	0	0.913179	0.397425	AMFR;SPPL3
Endoplasmic Reticulum To Golgi Vesicle-Mediated Transport (GO:0006888)	1648	0.651551	0.738027	0	0	0.898075	0.384735	SEC16A;TRAPPC10;TRAPPC9
Regulation Of Endopeptidase Activity (GO:0052548)	1649	0.653264	0.738027	0	0	0.960811	0.409088	VSIR
Regulation Of Reactive Oxygen Species Metabolic Process (GO:2000377)	1650	0.653264	0.738027	0	0	0.960811	0.409088	RIPK1
Regulation Of Substrate Adhesion-Dependent Cell Spreading (GO:1900024)	1651	0.653264	0.738027	0	0	0.960811	0.409088	CRKL
Negative Regulation Of Cysteine-Type Endopeptidase Activity Involved In Apoptotic Process (GO:0043154)	1652	0.653264	0.738027	0	0	0.960811	0.409088	USP47
Negative Regulation Of Protein Localization (GO:1903828)	1653	0.653264	0.738027	0	0	0.960811	0.409088	MFHAS1
Positive Regulation Of Protein Localization To Cell Periphery (GO:1904377)	1654	0.653264	0.738027	0	0	0.960811	0.409088	ARF6
Positive Regulation Of Protein Localization To Plasma Membrane (GO:1903078)	1655	0.653264	0.738027	0	0	0.960811	0.409088	ARF6
Protein Localization To Lysosome (GO:0061462)	1656	0.653264	0.738027	0	0	0.960811	0.409088	RTN4
Regulation Of Cell Death (GO:0010941)	1657	0.653264	0.738027	0	0	0.960811	0.409088	CHMP7
Cellular Response To Chemical Stress (GO:0062197)	1658	0.664002	0.748474	0	0	0.884012	0.361976	RPTOR;LRRC8D
Rho Protein Signal Transduction (GO:0007266)	1659	0.66531	0.748474	0	0	0.928691	0.378443	GNA12
Regulation Of Intracellular Protein Transport (GO:0033157)	1660	0.66531	0.748474	0	0	0.928691	0.378443	FRAT2
Cholesterol Homeostasis (GO:0042632)	1661	0.66531	0.748474	0	0	0.928691	0.378443	LIMA1
Ubiquitin-Dependent Protein Catabolic Process Via The Multivesicular Body Sorting Pathway (GO:0043162)	1662	0.66531	0.748474	0	0	0.928691	0.378443	CHMP7
Negative Regulation Of Cellular Response To Growth Factor Stimulus (GO:0090288)	1663	0.66531	0.748474	0	0	0.928691	0.378443	SPART
Positive Regulation Of Chromosome Organization (GO:2001252)	1664	0.66531	0.748474	0	0	0.928691	0.378443	NCAPH2
Regulation Of Protein Localization (GO:0032880)	1665	0.672193	0.755763	0	0	0.870112	0.345616	VCPIP1;PLEKHM2
Cellular Response To Mechanical Stimulus (GO:0071260)	1666	0.676939	0.756555	0	0	0.898643	0.350627	MAPK3
Spliceosomal snRNP Assembly (GO:0000387)	1667	0.676939	0.756555	0	0	0.898643	0.350627	GEMIN4
Sterol Homeostasis (GO:0055092)	1668	0.676939	0.756555	0	0	0.898643	0.350627	LIMA1
Translational Elongation (GO:0006414)	1669	0.676939	0.756555	0	0	0.898643	0.350627	GTPBP1
Internal Peptidyl-Lysine Acetylation (GO:0018393)	1670	0.676939	0.756555	0	0	0.898643	0.350627	MORF4L2
Phagocytosis (GO:0006909)	1671	0.676939	0.756555	0	0	0.898643	0.350627	ARHGAP25
Positive Regulation Of Cell Cycle G1/S Phase Transition (GO:1902808)	1672	0.676939	0.756555	0	0	0.898643	0.350627	RPTOR
Positive Regulation Of Interleukin-6 Production (GO:0032755)	1673	0.676939	0.756555	0	0	0.898643	0.350627	CARD9
protein-DNA Complex Assembly (GO:0065004)	1674	0.676939	0.756555	0	0	0.898643	0.350627	GRWD1
Regulation Of T Cell Activation (GO:0050863)	1675	0.676939	0.756555	0	0	0.898643	0.350627	PRKCQ
Regulation Of Cell Adhesion (GO:0030155)	1676	0.680222	0.759771	0	0	0.856639	0.330094	PDE3B;MINK1
Positive Regulation Of Cell Migration (GO:0030335)	1677	0.681777	0.761054	0	0	0.862556	0.330404	AKT2;VSIR;RTN4;CRKL
Regulation Of Neurogenesis (GO:0050767)	1678	0.688165	0.764991	0	0	0.870474	0.325319	PRUNE1
Base-Excision Repair (GO:0006284)	1679	0.688165	0.764991	0	0	0.870474	0.325319	USP47
Response To Interleukin-1 (GO:0070555)	1680	0.688165	0.764991	0	0	0.870474	0.325319	RELA
Glycosaminoglycan Biosynthetic Process (GO:0006024)	1681	0.688165	0.764991	0	0	0.870474	0.325319	B4GAT1
Histone Deubiquitination (GO:0016578)	1682	0.688165	0.764991	0	0	0.870474	0.325319	USP22
Negative Regulation Of Transferase Activity (GO:0051348)	1683	0.688165	0.764991	0	0	0.870474	0.325319	CDKN1B
Regulation Of BMP Signaling Pathway (GO:0030510)	1684	0.688165	0.764991	0	0	0.870474	0.325319	SPART
Regulation Of Cell Cycle Process (GO:0010564)	1685	0.691592	0.768344	0	0	0.843137	0.310914	SMARCC1;ARID1B;MCM2
Fatty Acid Metabolic Process (GO:0006631)	1686	0.695798	0.77154	0	0	0.830901	0.301364	PNPLA8;MLYCD
Protein Catabolic Process (GO:0030163)	1687	0.695798	0.77154	0	0	0.830901	0.301364	RIPK1;STT3B
Regulation Of Mitotic Nuclear Division (GO:0007088)	1688	0.699002	0.77154	0	0	0.844011	0.302242	NME6
Regulation Of Mitotic Spindle Organization (GO:0060236)	1689	0.699002	0.77154	0	0	0.844011	0.302242	CHMP7
Calcium-Mediated Signaling (GO:0019722)	1690	0.699002	0.77154	0	0	0.844011	0.302242	PRNP
Cellular Response To Glucose Starvation (GO:0042149)	1691	0.699002	0.77154	0	0	0.844011	0.302242	MTMR3
Histone H3 Acetylation (GO:0043966)	1692	0.699002	0.77154	0	0	0.844011	0.302242	USP22
mRNA Destabilization (GO:0061157)	1693	0.699002	0.77154	0	0	0.844011	0.302242	YTHDF1
Peptide Metabolic Process (GO:0006518)	1694	0.699002	0.77154	0	0	0.844011	0.302242	SPPL3
Positive Regulation Of Double-Strand Break Repair Via Homologous Recombination (GO:1905168)	1695	0.699002	0.77154	0	0	0.844011	0.302242	MORF4L2
Positive Regulation Of Viral Process (GO:0048524)	1696	0.699002	0.77154	0	0	0.844011	0.302242	TMEM250
Plasma Membrane Bounded Cell Projection Organization (GO:0120036)	1697	0.703349	0.775423	0	0	0.8186	0.288067	LIMA1;RAB35
Protein Processing (GO:0016485)	1698	0.703349	0.775423	0	0	0.8186	0.288067	SPPL3;VSIR
DNA Integrity Checkpoint Signaling (GO:0031570)	1699	0.709464	0.778497	0	0	0.819105	0.281155	HINFP
Regulation Of Immune Response (GO:0050776)	1700	0.709464	0.778497	0	0	0.819105	0.281155	SPPL2B
Wnt Signaling Pathway (GO:0016055)	1701	0.709464	0.778497	0	0	0.819105	0.281155	TCF7
Response To Amino Acid Starvation (GO:1990928)	1702	0.709464	0.778497	0	0	0.819105	0.281155	MAPK3
Fatty Acid Biosynthetic Process (GO:0006633)	1703	0.709464	0.778497	0	0	0.819105	0.281155	MLYCD
Membrane Lipid Biosynthetic Process (GO:0046467)	1704	0.709464	0.778497	0	0	0.819105	0.281155	CSNK1G2
Negative Regulation Of Cytokine-Mediated Signaling Pathway (GO:0001960)	1705	0.709464	0.778497	0	0	0.819105	0.281155	MUL1
Positive Regulation Of Lymphocyte Proliferation (GO:0050671)	1706	0.709464	0.778497	0	0	0.819105	0.281155	BCL2
Regulation Of Protein Metabolic Process (GO:0051246)	1707	0.710743	0.779444	0	0	0.806655	0.275428	TCOF1;KLF2
T Cell Differentiation (GO:0030217)	1708	0.719562	0.784977	0	0	0.795623	0.261849	TCF7
Cell Morphogenesis Involved In Neuron Differentiation (GO:0048667)	1709	0.719562	0.784977	0	0	0.795623	0.261849	MINK1
Vacuolar Transport (GO:0007034)	1710	0.719562	0.784977	0	0	0.795623	0.261849	CHMP7
Vascular Transport (GO:0010232)	1711	0.719562	0.784977	0	0	0.795623	0.261849	SLC2A1
Mitotic Spindle Assembly (GO:0090307)	1712	0.719562	0.784977	0	0	0.795623	0.261849	BCCIP
Myeloid Cell Differentiation (GO:0030099)	1713	0.719562	0.784977	0	0	0.795623	0.261849	MFHAS1
Nuclear Transport (GO:0051169)	1714	0.719562	0.784977	0	0	0.795623	0.261849	NUP210
Positive Regulation Of Stem Cell Population Maintenance (GO:1902459)	1715	0.719562	0.784977	0	0	0.795623	0.261849	SMARCC1
Regulation Of Amide Metabolic Process (GO:0034248)	1716	0.719562	0.784977	0	0	0.795623	0.261849	TCOF1
Mitotic Spindle Organization (GO:0007052)	1717	0.725069	0.790064	0	0	0.783775	0.251974	FAM110A;BCCIP
Nuclear-Transcribed mRNA Catabolic Process (GO:0000956)	1718	0.725069	0.790064	0	0	0.783775	0.251974	EXOSC6;SMG9
Regulation Of Epithelial To Mesenchymal Transition (GO:0010717)	1719	0.729311	0.791461	0	0	0.773445	0.244142	SDHAF2
Regulation Of Intrinsic Apoptotic Signaling Pathway (GO:2001242)	1720	0.729311	0.791461	0	0	0.773445	0.244142	BCL2
Regulation Of Kinase Activity (GO:0043549)	1721	0.729311	0.791461	0	0	0.773445	0.244142	CDKN1B
Cholesterol Metabolic Process (GO:0008203)	1722	0.729311	0.791461	0	0	0.773445	0.244142	INSIG2
Transport Across Blood-Brain Barrier (GO:0150104)	1723	0.729311	0.791461	0	0	0.773445	0.244142	SLC2A1
Membrane Fission (GO:0090148)	1724	0.729311	0.791461	0	0	0.773445	0.244142	CHMP7
Protein Secretion (GO:0009306)	1725	0.729311	0.791461	0	0	0.773445	0.244142	GOLPH3
Positive Regulation Of Apoptotic Process (GO:0043065)	1726	0.730247	0.792018	0	0	0.817067	0.256863	PRNP;BCL2;RIPK1;QRICH1;MAP3K11
Autophagosome Maturation (GO:0097352)	1727	0.738722	0.798434	0	0	0.752466	0.227872	CHMP7
Double-Strand Break Repair Via Nonhomologous End Joining (GO:0006303)	1728	0.738722	0.798434	0	0	0.752466	0.227872	RNF8
Mitotic G2/M Transition Checkpoint (GO:0044818)	1729	0.738722	0.798434	0	0	0.752466	0.227872	ZNF830
Positive Regulation Of Proteolysis (GO:0045862)	1730	0.738722	0.798434	0	0	0.752466	0.227872	TNIP1
Positive Regulation Of Tumor Necrosis Factor Production (GO:0032760)	1731	0.738722	0.798434	0	0	0.752466	0.227872	RIPK1
Regulation Of Actin Filament Polymerization (GO:0030833)	1732	0.738722	0.798434	0	0	0.752466	0.227872	ARF6
Plasma Membrane Bounded Cell Projection Assembly (GO:0120031)	1733	0.743759	0.803414	0	0	0.802654	0.237616	GOLPH3;MINK1;B9D2;TMEM250;ARF6
Regulation Of Cold-Induced Thermogenesis (GO:0120161)	1734	0.745433	0.803612	0	0	0.751774	0.220864	GNAS;EHMT1
Organic Substance Transport (GO:0071702)	1735	0.745433	0.803612	0	0	0.751774	0.220864	CMTM6;SCAMP2
Protein Localization To Plasma Membrane (GO:0072659)	1736	0.745433	0.803612	0	0	0.751774	0.220864	TSPAN14;SEC16A
DNA Duplex Unwinding (GO:0032508)	1737	0.747806	0.803612	0	0	0.732591	0.212899	MCM2
Calcium Ion Transport (GO:0006816)	1738	0.747806	0.803612	0	0	0.732591	0.212899	STIM2
Negative Regulation Of TOR Signaling (GO:0032007)	1739	0.747806	0.803612	0	0	0.732591	0.212899	RNF167
Negative Regulation Of Protein-Containing Complex Assembly (GO:0031333)	1740	0.747806	0.803612	0	0	0.732591	0.212899	PPM1A
Positive Regulation Of Tumor Necrosis Factor Superfamily Cytokine Production (GO:1903557)	1741	0.747806	0.803612	0	0	0.732591	0.212899	RIPK1
Regulation Of DNA-templated Transcription Elongation (GO:0032784)	1742	0.747806	0.803612	0	0	0.732591	0.212899	INTS1
Protein Localization To Membrane (GO:0072657)	1743	0.750473	0.806016	0	0	0.765014	0.219598	TSPAN14;TMEM147;SEC16A
Regulation Of Multicellular Organismal Development (GO:2000026)	1744	0.756575	0.80932	0	0	0.713735	0.199098	EHMT1
Regulation Of Osteoblast Differentiation (GO:0045667)	1745	0.756575	0.80932	0	0	0.713735	0.199098	RIOX1
Intrinsic Apoptotic Signaling Pathway In Response To DNA Damage (GO:0008630)	1746	0.756575	0.80932	0	0	0.713735	0.199098	BCL2
Mitotic Nuclear Division (GO:0140014)	1747	0.756575	0.80932	0	0	0.713735	0.199098	CHMP7
Positive Regulation Of Cell-Substrate Adhesion (GO:0010811)	1748	0.756575	0.80932	0	0	0.713735	0.199098	CRKL
Positive Regulation Of Protein Polymerization (GO:0032273)	1749	0.756575	0.80932	0	0	0.713735	0.199098	ARF6
Regulation Of TORC1 Signaling (GO:1903432)	1750	0.756575	0.80932	0	0	0.713735	0.199098	RNF167
Protein Localization (GO:0008104)	1751	0.75773	0.810091	0	0	0.809065	0.224458	ARFRP1;STX16;RAB35;ERBIN;ERP29;PEX14;ARF6
Neuron Development (GO:0048666)	1752	0.764492	0.816043	0	0	0.722267	0.193961	SRF;RAB35
DNA-templated DNA Replication Maintenance Of Fidelity (GO:0045005)	1753	0.765041	0.816043	0	0	0.695822	0.186359	CENPS
Negative Regulation Of Cellular Component Organization (GO:0051129)	1754	0.765041	0.816043	0	0	0.695822	0.186359	DNAJB2
Positive Regulation Of Mitochondrion Organization (GO:0010822)	1755	0.765041	0.816043	0	0	0.695822	0.186359	MUL1
Positive Regulation Of Autophagy (GO:0010508)	1756	0.770564	0.821467	0	0	0.712935	0.185814	USP20;PIK3CB
Regulation Of Embryonic Development (GO:0045995)	1757	0.773212	0.822884	0	0	0.678783	0.174584	EHMT1
Regulation Of Endothelial Cell Migration (GO:0010594)	1758	0.773212	0.822884	0	0	0.678783	0.174584	PIK3CB
Enzyme-Linked Receptor Protein Signaling Pathway (GO:0007167)	1759	0.773212	0.822884	0	0	0.678783	0.174584	PIK3CB
Protein Localization To Cell Periphery (GO:1990778)	1760	0.7765	0.825914	0	0	0.70384	0.178042	TSPAN14;SEC16A
Apoptotic Process (GO:0006915)	1761	0.777383	0.826383	0	0	0.75038	0.188962	BCL2;RIPK1;RTN4;MCM2
Selective Autophagy (GO:0061912)	1762	0.781101	0.827254	0	0	0.662555	0.163685	RETREG1
Negative Regulation Of Kinase Activity (GO:0033673)	1763	0.781101	0.827254	0	0	0.662555	0.163685	CDKN1B
Plasma Membrane Organization (GO:0007009)	1764	0.781101	0.827254	0	0	0.662555	0.163685	CHMP7
Positive Regulation Of Apoptotic Signaling Pathway (GO:2001235)	1765	0.781101	0.827254	0	0	0.662555	0.163685	RIPK1
Positive Regulation Of Cytoskeleton Organization (GO:0051495)	1766	0.781101	0.827254	0	0	0.662555	0.163685	ARF6
Protein Monoubiquitination (GO:0006513)	1767	0.781101	0.827254	0	0	0.662555	0.163685	FAAP100
Proteasomal Protein Catabolic Process (GO:0010498)	1768	0.781295	0.827254	0	0	0.762266	0.188129	FBXW5;HECTD1;MTA1;UBXN11;PCBP2
Cellular Response To Oxidative Stress (GO:0034599)	1769	0.782302	0.827384	0	0	0.694972	0.170626	PEX14;MAPK3
Positive Regulation Of Cell Cycle Process (GO:0090068)	1770	0.782302	0.827384	0	0	0.694972	0.170626	NCAPH2;CEP295
RNA Modification (GO:0009451)	1771	0.788715	0.832286	0	0	0.647082	0.153585	TSR3
Axon Development (GO:0061564)	1772	0.788715	0.832286	0	0	0.647082	0.153585	RTN4
Replication Fork Processing (GO:0031297)	1773	0.788715	0.832286	0	0	0.647082	0.153585	CENPS
Negative Regulation Of Intrinsic Apoptotic Signaling Pathway (GO:2001243)	1774	0.788715	0.832286	0	0	0.647082	0.153585	BCL2
Ribosome Assembly (GO:0042255)	1775	0.796066	0.838152	0	0	0.632312	0.144214	RRP7A
Negative Regulation Of Catabolic Process (GO:0009895)	1776	0.796066	0.838152	0	0	0.632312	0.144214	PDE3B
Negative Regulation Of Cell Death (GO:0060548)	1777	0.796066	0.838152	0	0	0.632312	0.144214	CHMP7
Nucleotide-Excision Repair (GO:0006289)	1778	0.796066	0.838152	0	0	0.632312	0.144214	XAB2
Negative Regulation Of Cell Population Proliferation (GO:0008285)	1779	0.796562	0.838204	0	0	0.74557	0.16958	DNAJB2;PARP10;CDKN1B;POLR2D;THAP12
Mitotic DNA Damage Checkpoint Signaling (GO:0044773)	1780	0.803161	0.843725	0	0	0.618199	0.135509	ZNF830
Neuron Projection Guidance (GO:0097485)	1781	0.803161	0.843725	0	0	0.618199	0.135509	PRKCQ
Peptidyl-Threonine Phosphorylation (GO:0018107)	1782	0.803161	0.843725	0	0	0.618199	0.135509	CAD
Regulation Of Cellular Localization (GO:0060341)	1783	0.81001	0.849014	0	0	0.604699	0.127415	PLEKHM2
Regulation Of Stress Fiber Assembly (GO:0051492)	1784	0.81001	0.849014	0	0	0.604699	0.127415	ARAP1
Metaphase Plate Congression (GO:0051310)	1785	0.81001	0.849014	0	0	0.604699	0.127415	CHMP7
Positive Regulation Of Cell Cycle (GO:0045787)	1786	0.81001	0.849014	0	0	0.604699	0.127415	USP22
RNA Splicing, Via Transesterification Reactions With Bulged Adenosine As Nucleophile (GO:0000377)	1787	0.814038	0.85267	0	0	0.70672	0.145406	RBM4;XAB2;SF3A2;DHX38
Protein-Containing Complex Organization (GO:0043933)	1788	0.814409	0.85267	0	0	0.646096	0.132639	SLC2A1;PEX14
Mitotic Metaphase Plate Congression (GO:0007080)	1789	0.816622	0.854031	0	0	0.591774	0.119881	CHMP7
Post-Transcriptional Regulation Of Gene Expression (GO:0010608)	1790	0.816622	0.854031	0	0	0.591774	0.119881	TCOF1
Modification-Dependent Protein Catabolic Process (GO:0019941)	1791	0.817789	0.854775	0	0	0.702176	0.141243	RNF167;FEM1A;RNF8;UBE2L3
Positive Regulation Of Programmed Cell Death (GO:0043068)	1792	0.821478	0.856876	0	0	0.697689	0.1372	BCL2;RIPK1;QRICH1;MAP3K11
Positive Regulation Of Signal Transduction (GO:0009967)	1793	0.821534	0.856876	0	0	0.671456	0.131996	TSPAN14;ITGA5;KLF2
NADH Dehydrogenase Complex Assembly (GO:0010257)	1794	0.823004	0.856876	0	0	0.579387	0.112862	DMAC1
Mitochondrial Respiratory Chain Complex I Assembly (GO:0032981)	1795	0.823004	0.856876	0	0	0.579387	0.112862	DMAC1
Negative Regulation Of Transforming Growth Factor Beta Receptor Signaling Pathway (GO:0030512)	1796	0.823004	0.856876	0	0	0.579387	0.112862	PPM1A
Positive Regulation Of Epithelial Cell Proliferation (GO:0050679)	1797	0.823004	0.856876	0	0	0.579387	0.112862	RTN4
Protein O-linked Glycosylation (GO:0006493)	1798	0.823004	0.856876	0	0	0.579387	0.112862	B4GAT1
Translation (GO:0006412)	1799	0.827853	0.860368	0	0	0.710509	0.134229	MRPL4;TNIP1;RPLP2;EIF4EBP2;GTPBP1
Negative Regulation Of Protein Phosphorylation (GO:0001933)	1800	0.828824	0.860368	0	0	0.624129	0.117179	PRNP;CRKL
Defense Response To Bacterium (GO:0042742)	1801	0.829164	0.860368	0	0	0.567506	0.106315	NOD1
Ribosomal Large Subunit Biogenesis (GO:0042273)	1802	0.829164	0.860368	0	0	0.567506	0.106315	NIP7
Peptidyl-Threonine Modification (GO:0018210)	1803	0.829164	0.860368	0	0	0.567506	0.106315	CAD
Regulation Of Ras Protein Signal Transduction (GO:0046578)	1804	0.829164	0.860368	0	0	0.567506	0.106315	ARF6
Membrane Organization (GO:0061024)	1805	0.829575	0.860368	0	0	0.660664	0.12344	CTDNEP1;SYNGR2;CHMP7
Regulation Of Cell Migration (GO:0030334)	1806	0.831077	0.861448	0	0	0.706812	0.130784	AKT2;ZMYND8;GNA12;MINK1;VSIR
Peptide Biosynthetic Process (GO:0043043)	1807	0.833478	0.86346	0	0	0.655396	0.119379	TNIP1;EIF4EBP2;RPLP2
Exocytosis (GO:0006887)	1808	0.835111	0.863717	0	0	0.5561	0.100204	SYNGR2
Lymphocyte Differentiation (GO:0030098)	1809	0.835111	0.863717	0	0	0.5561	0.100204	TCF3
Positive Regulation Of Supramolecular Fiber Organization (GO:1902905)	1810	0.835111	0.863717	0	0	0.5561	0.100204	ARF6
Axon Guidance (GO:0007411)	1811	0.846392	0.872098	0	0	0.534605	0.0891575	PRKCQ
Regulation Of Protein Localization To Plasma Membrane (GO:1903076)	1812	0.846392	0.872098	0	0	0.534605	0.0891575	ARF6
Mitotic Cytokinesis (GO:0000281)	1813	0.846392	0.872098	0	0	0.534605	0.0891575	RAB35
Positive Regulation Of Kinase Activity (GO:0033674)	1814	0.846392	0.872098	0	0	0.534605	0.0891575	MAP2K3
Defense Response To Symbiont (GO:0140546)	1815	0.846476	0.872098	0	0	0.597045	0.0995117	BCL2;RELA
Neuron Projection Development (GO:0031175)	1816	0.846476	0.872098	0	0	0.597045	0.0995117	RAB35;MINK1
Positive Regulation Of Hydrolase Activity (GO:0051345)	1817	0.846476	0.872098	0	0	0.597045	0.0995117	SGSM2;ARAP1
Positive Regulation Of Mitotic Cell Cycle Phase Transition (GO:1901992)	1818	0.85174	0.876557	0	0	0.524465	0.0841628	RPTOR
Positive Regulation Of Plasma Membrane Bounded Cell Projection Assembly (GO:0120034)	1819	0.85174	0.876557	0	0	0.524465	0.0841628	ARAP1
Cellular Response To Transforming Growth Factor Beta Stimulus (GO:0071560)	1820	0.856903	0.880902	0	0	0.514701	0.0794855	CRKL
Generation Of Neurons (GO:0048699)	1821	0.856903	0.880902	0	0	0.514701	0.0794855	RTN4
Spindle Assembly (GO:0051225)	1822	0.861887	0.885539	0	0	0.505292	0.0751024	BCCIP
Double-Strand Break Repair Via Homologous Recombination (GO:0000724)	1823	0.862461	0.885643	0	0	0.572194	0.0846649	ZMYND8;MCM2
Cellular Response To Nutrient Levels (GO:0031669)	1824	0.866697	0.888044	0	0	0.49622	0.0709921	RPTOR
Sphingolipid Metabolic Process (GO:0006665)	1825	0.866697	0.888044	0	0	0.49622	0.0709921	CSNK1G2
Protein Autoubiquitination (GO:0051865)	1826	0.866697	0.888044	0	0	0.49622	0.0709921	RNF8
Regulation Of DNA Replication (GO:0006275)	1827	0.866697	0.888044	0	0	0.49622	0.0709921	JADE2
Regulation Of Mitotic Cell Cycle (GO:0007346)	1828	0.86987	0.89032	0	0	0.560521	0.0781433	CDKN1B;USP22
Positive Regulation Of Cell Motility (GO:2000147)	1829	0.86987	0.89032	0	0	0.560521	0.0781433	AKT2;VSIR
Regulation Of Double-Strand Break Repair Via Homologous Recombination (GO:0010569)	1830	0.875822	0.895923	0	0	0.479013	0.0635133	MORF4L2
Regulation Of Cell Population Proliferation (GO:0042127)	1831	0.876401	0.896026	0	0	0.723735	0.0954834	DNAJB2;SMARCC1;CDKN1B;AKT2;BCL2;THAP12;KRAS;TMEM250;RELA;CRKL
Aerobic Electron Transport Chain (GO:0019646)	1832	0.880149	0.899366	0	0	0.470847	0.0601104	SDHAF2
Mitochondrial ATP Synthesis Coupled Electron Transport (GO:0042775)	1833	0.884325	0.902648	0	0	0.462953	0.0569113	SDHAF2
Positive Regulation Of Protein Catabolic Process (GO:0045732)	1834	0.884325	0.902648	0	0	0.462953	0.0569113	CDKN1B
T Cell Activation (GO:0042110)	1835	0.892246	0.909246	0	0	0.447929	0.0510698	LY9
Proteolysis Involved In Protein Catabolic Process (GO:0051603)	1836	0.892246	0.909246	0	0	0.447929	0.0510698	ZER1
Receptor-Mediated Endocytosis (GO:0006898)	1837	0.892246	0.909246	0	0	0.447929	0.0510698	PI4KB
mRNA Processing (GO:0006397)	1838	0.895352	0.911584	0	0	0.601368	0.0664745	XAB2;RBM4;SF3A2;DHX38
Regulation Of Cytoskeleton Organization (GO:0051493)	1839	0.896002	0.911584	0	0	0.440775	0.0484028	MAPK3
Transmembrane Receptor Protein Serine/Threonine Kinase Signaling Pathway (GO:0007178)	1840	0.896002	0.911584	0	0	0.440775	0.0484028	MAPK3
Cilium Organization (GO:0044782)	1841	0.8968	0.911901	0	0	0.565083	0.0615503	RRP7A;B9D2;TMEM250
Double-Strand Break Repair (GO:0006302)	1842	0.89931	0.913956	0	0	0.561208	0.0595598	MTA1;ZMYND8;RNF8
Negative Regulation Of Multicellular Organismal Process (GO:0051241)	1843	0.901703	0.915891	0	0	0.508585	0.0526235	SDHAF2;SRF
Regulation Of DNA Metabolic Process (GO:0051052)	1844	0.904452	0.918186	0	0	0.503911	0.0506055	USP22;JADE2
Protein Modification By Small Protein Conjugation (GO:0032446)	1845	0.905582	0.918834	0	0	0.634522	0.0629302	VCPIP1;FBXW5;CUL2;MSL2;MUL1;UBE2L3
DNA-templated DNA Replication (GO:0006261)	1846	0.906503	0.919271	0	0	0.420613	0.0412878	MCM2
Negative Regulation Of Cell Motility (GO:2000146)	1847	0.909763	0.922077	0	0	0.414293	0.0391803	ZMYND8
Peptidyl-Lysine Modification (GO:0018205)	1848	0.918878	0.930811	0	0	0.396419	0.0335378	SENP7
Regulation Of Transforming Growth Factor Beta Receptor Signaling Pathway (GO:0017015)	1849	0.921707	0.932668	0	0	0.390796	0.0318606	PPM1A
Neuron Projection Morphogenesis (GO:0048812)	1850	0.921707	0.932668	0	0	0.390796	0.0318606	MINK1
Vesicle-Mediated Transport (GO:0016192)	1851	0.923989	0.934471	0	0	0.608175	0.0480797	STX16;RAB35;ATP9B;CHMP7;CSNK1G2;ARF6
Regulation Of Macroautophagy (GO:0016241)	1852	0.932075	0.941858	0	0	0.369805	0.026013	UBQLN2
Mitochondrion Organization (GO:0007005)	1853	0.932298	0.941858	0	0	0.453796	0.0318122	AIP;MUL1
Organelle Organization (GO:0006996)	1854	0.937918	0.947024	0	0	0.586008	0.0375588	GOLPH3;YTHDF1;SEC16A;PLEKHM2;CHMP7;PEX14
Lysosomal Transport (GO:0007041)	1855	0.938941	0.947035	0	0	0.355475	0.0223958	CHMP7
Positive Regulation Of DNA Metabolic Process (GO:0051054)	1856	0.938941	0.947035	0	0	0.355475	0.0223958	RNF8
Regulation Of Neuron Projection Development (GO:0010975)	1857	0.943129	0.949725	0	0	0.346518	0.0202892	YTHDF1
Axonogenesis (GO:0007409)	1858	0.943129	0.949725	0	0	0.346518	0.0202892	PRKCQ
Negative Regulation Of Cell Migration (GO:0030336)	1859	0.943129	0.949725	0	0	0.346518	0.0202892	ZMYND8
Recombinational Repair (GO:0000725)	1860	0.948881	0.955003	0	0	0.333893	0.01752	ZMYND8
Regulation Of Protein Kinase Activity (GO:0045859)	1861	0.950666	0.955259	0	0	0.329885	0.0166896	MAP2K3
Cytoplasmic Translation (GO:0002181)	1862	0.950666	0.955259	0	0	0.329885	0.0166896	RPLP2
Regulation Of Angiogenesis (GO:0045765)	1863	0.950666	0.955259	0	0	0.329885	0.0166896	PDE3B
Regulation Of Protein Catabolic Process (GO:0042176)	1864	0.955657	0.959256	0	0	0.318413	0.0144419	CDKN1B
Protein-Containing Complex Assembly (GO:0065003)	1865	0.955669	0.959256	0	0	0.498805	0.0226175	MID1IP1;SLC2A1;RIPK1;PEX14
Inorganic Cation Transmembrane Transport (GO:0098662)	1866	0.958702	0.961269	0	0	0.311195	0.0131247	SLC30A5
Monoatomic Cation Transmembrane Transport (GO:0098655)	1867	0.958702	0.961269	0	0	0.311195	0.0131247	SLC30A5
Proteolysis (GO:0006508)	1868	0.962425	0.964485	0	0	0.389094	0.0149021	SPPL2B;SPPL3
Mitochondrial Translation (GO:0032543)	1869	0.964179	0.965727	0	0	0.297691	0.0108592	MRPL4
Mitochondrial Gene Expression (GO:0140053)	1870	0.970018	0.970957	0	0	0.28236	0.00859514	MRPL4
Cilium Assembly (GO:0060271)	1871	0.970439	0.970957	0	0	0.368045	0.011044	B9D2;TMEM250
Protein Targeting (GO:0006605)	1872	0.976633	0.976633	0	0	0.263351	0.00622674	HPS4

## Sheet: UniqueNaive_GO
Term	Rank	P.value	Adjusted.P.value	Old.P.value	Old.Adjusted.P.value	Odds.Ratio	Combined.Score	Genes
CaM Pathway	1	0.00174579	0.135102	0	0	37.539	238.393	PRKAR1B;CAMKK2
Calmodulin Induced Events	2	0.00174579	0.135102	0	0	37.539	238.393	PRKAR1B;CAMKK2
Ca-dependent Events	3	0.0019168	0.135102	0	0	35.6586	223.119	PRKAR1B;CAMKK2
Neutrophil Degranulation	4	0.00196772	0.135102	0	0	6.40537	39.9111	NCSTN;IMPDH1;PSMD3;CMTM6;SNAP29
Innate Immune System	5	0.00211097	0.135102	0	0	4.56679	28.1342	NCSTN;IMPDH1;PSMD3;CMTM6;WASF2;SNAP29;BCL2L1
DAG and IP3 Signaling	6	0.00267686	0.142766	0	0	29.704	175.94	PRKAR1B;CAMKK2
PLC Beta Mediated Events	7	0.00379462	0.173468	0	0	24.5707	136.962	PRKAR1B;CAMKK2
G-protein Mediated Events	8	0.00455265	0.182106	0	0	22.2608	120.031	PRKAR1B;CAMKK2
Apoptosis	9	0.00624148	0.197502	0	0	8.84533	44.9037	PSMD3;YWHAG;BCL2L1
Intrinsic Pathway for Apoptosis	10	0.00688449	0.197502	0	0	17.7948	88.5913	YWHAG;BCL2L1
Post NMDA Receptor Activation Events	11	0.00720698	0.197502	0	0	17.3591	85.6275	PRKAR1B;CAMKK2
Activation of NMDA Receptors and Postsynaptic Events	12	0.00891988	0.197502	0	0	15.4648	72.9855	PRKAR1B;CAMKK2
SARS-CoV-1-mediated Effects on Programmed Cell Death	13	0.00892328	0.197502	0	0	172.65	814.751	BCL2L1
Programmed Cell Death	14	0.0100359	0.197502	0	0	7.39358	34.0222	PSMD3;YWHAG;BCL2L1
Negative Regulation of TCF-dependent Signaling by DVL-interacting Proteins	15	0.0118806	0.197502	0	0	115.089	510.172	CCDC88C
Regulation of NPAS4 Gene Transcription	16	0.0118806	0.197502	0	0	115.089	510.172	SRF
Opioid Signalling	17	0.0124126	0.197502	0	0	12.9229	56.7191	PRKAR1B;CAMKK2
Signaling by NOTCH4	18	0.013258	0.197502	0	0	12.467	53.8969	NCSTN;PSMD3
Activation of RAC1 Downstream of NMDARs	19	0.0177695	0.197502	0	0	69.04	278.25	CAMKK2
STAT5 Activation Downstream of FLT3 ITD Mutants	20	0.0177695	0.197502	0	0	69.04	278.25	BCL2L1
Nuclear Events Mediated by NFE2L2	21	0.0178464	0.197502	0	0	10.596	42.659	PSMD3;BCL2L1
Signal Transduction	22	0.0182913	0.197502	0	0	2.62715	10.5121	NCSTN;PRKAR1B;SRF;PSMD3;CCDC88C;WASF2;YWHAG;BCL2L1;CAMKK2
Infectious Disease	23	0.0200464	0.197502	0	0	3.15705	12.3431	PRKAR1B;IMPDH1;PSMD3;WASF2;YWHAG;BCL2L1
NOTCH4 Activation and Transmission of Signal to the Nucleus	24	0.0207013	0.197502	0	0	57.5278	223.067	NCSTN
Noncanonical Activation of NOTCH3	25	0.0207013	0.197502	0	0	57.5278	223.067	NCSTN
CREB1 Phosphorylation Through the Activation of CaMKII CaMKK CaMKIV Cascasde	26	0.0207013	0.197502	0	0	57.5278	223.067	CAMKK2
TGFBR3 PTM Regulation	27	0.0207013	0.197502	0	0	57.5278	223.067	NCSTN
Hedgehog 'Off' State	28	0.022469	0.197502	0	0	9.33303	35.4246	PRKAR1B;PSMD3
SARS-CoV-1-host Interactions	29	0.0235569	0.197502	0	0	9.09195	34.0797	YWHAG;BCL2L1
SARS-CoV-2 Targets Host Intracellular Signalling and Regulatory Pathways	30	0.0236245	0.197502	0	0	49.3048	184.669	YWHAG
BH3-only Proteins Associate With and Inactivate Anti-Apoptotic BCL-2 Members	31	0.0236245	0.197502	0	0	49.3048	184.669	BCL2L1
CaMK IV-mediated Phosphorylation of CREB	32	0.0236245	0.197502	0	0	49.3048	184.669	CAMKK2
Immune System	33	0.0238285	0.197502	0	0	2.61829	9.7842	MAP3K3;NCSTN;IMPDH1;PSMD3;CMTM6;WASF2;SNAP29;BCL2L1
RHO GTPase Effectors	34	0.0238297	0.197502	0	0	5.28173	19.7369	SRF;WASF2;YWHAG
Intracellular Signaling by Second Messengers	35	0.0238297	0.197502	0	0	5.28173	19.7369	PRKAR1B;PSMD3;CAMKK2
Neurotransmitter Receptors and Postsynaptic Signal Transmission	36	0.025229	0.197502	0	0	8.75266	32.2077	PRKAR1B;CAMKK2
Interleukin-1 Signaling	37	0.0257969	0.197502	0	0	8.64508	31.6194	MAP3K3;PSMD3
NFE2L2 Regulating Tumorigenic Genes	38	0.0265394	0.197502	0	0	43.1375	156.551	BCL2L1
PKA Activation	39	0.0265394	0.197502	0	0	43.1375	156.551	PRKAR1B
PKA Activation in Glucagon Signalling	40	0.0265394	0.197502	0	0	43.1375	156.551	PRKAR1B
CREB1 Phosphorylation Through the Activation of Adenylate Cyclase	41	0.0265394	0.197502	0	0	43.1375	156.551	PRKAR1B
Regulated Proteolysis of p75NTR	42	0.0265394	0.197502	0	0	43.1375	156.551	NCSTN
Regulation of Localization of FOXO Transcription Factors	43	0.0265394	0.197502	0	0	43.1375	156.551	YWHAG
G Alpha (I) Signalling Events	44	0.0293128	0.208115	0	0	8.05094	28.4176	PRKAR1B;CAMKK2
Purine Ribonucleoside Monophosphate Biosynthesis	45	0.0294458	0.208115	0	0	38.3407	135.159	IMPDH1
KEAP1-NFE2L2 Pathway	46	0.0299166	0.208115	0	0	7.95971	27.9333	PSMD3;BCL2L1
Signaling by FLT3 ITD and TKD Mutants	47	0.0323438	0.208791	0	0	34.5033	118.392	BCL2L1
PKA-mediated Phosphorylation of CREB	48	0.0323438	0.208791	0	0	34.5033	118.392	PRKAR1B
Chk1 Chk2(Cds1) Mediated Inactivation of Cyclin B Cdk1 Complex	49	0.0323438	0.208791	0	0	34.5033	118.392	YWHAG
SARS-CoV-1 Targets Host Intracellular Signalling and Regulatory Pathways	50	0.0352334	0.208791	0	0	31.3636	104.935	YWHAG
Activation of BAD and Translocation to Mitochondria	51	0.0352334	0.208791	0	0	31.3636	104.935	YWHAG
NRIF Signals Cell Death From the Nucleus	52	0.0352334	0.208791	0	0	31.3636	104.935	NCSTN
Cardiogenesis	53	0.0352334	0.208791	0	0	31.3636	104.935	SRF
Regulation of NPAS4 Gene Expression	54	0.0352334	0.208791	0	0	31.3636	104.935	SRF
Interleukin-1 Family Signaling	55	0.0362233	0.210744	0	0	7.14873	23.7199	MAP3K3;PSMD3
Signaling by Hedgehog	56	0.0368802	0.210744	0	0	7.07655	23.3532	PRKAR1B;PSMD3
Nucleotide Biosynthesis	57	0.0381147	0.213977	0	0	28.7472	93.9217	IMPDH1
Transmission Across Chemical Synapses	58	0.0395537	0.215888	0	0	6.80172	21.9702	PRKAR1B;CAMKK2
Parasitic Infection Pathways	59	0.0416063	0.215888	0	0	6.60909	21.0136	PRKAR1B;WASF2
Leishmania Infection	60	0.0416063	0.215888	0	0	6.60909	21.0136	PRKAR1B;WASF2
G2 M Checkpoints	61	0.0422993	0.215888	0	0	6.54725	20.7089	PSMD3;YWHAG
Signaling by Interleukins	62	0.0435856	0.215888	0	0	4.12991	12.9391	MAP3K3;PSMD3;BCL2L1
NOTCH2 Activation and Transmission of Signal to the Nucleus	63	0.0438523	0.215888	0	0	24.6357	77.0341	NCSTN
Activation of AMPK Downstream of NMDARs	64	0.0438523	0.215888	0	0	24.6357	77.0341	CAMKK2
Inflammasomes	65	0.0438523	0.215888	0	0	24.6357	77.0341	BCL2L1
TCF Dependent Signaling in Response to WNT	66	0.0465487	0.219805	0	0	6.19903	19.014	PSMD3;CCDC88C
Estrogen-dependent Nuclear Events Downstream of ESR-membrane Signaling	67	0.0467086	0.219805	0	0	22.9911	70.4408	SRF
Glucagon Signaling in Metabolic Regulation	68	0.0467086	0.219805	0	0	22.9911	70.4408	PRKAR1B
SARS-CoV-1 Infection	69	0.0487306	0.225997	0	0	6.03831	18.2445	YWHAG;BCL2L1
Nuclear Signaling by ERBB4	70	0.0495567	0.226545	0	0	21.5521	64.7562	NCSTN
NOTCH3 Activation and Transmission of Signal to the Nucleus	71	0.0523966	0.232874	0	0	20.2824	59.8109	NCSTN
Azathioprine ADME	72	0.0523966	0.232874	0	0	20.2824	59.8109	IMPDH1
Signaling by NOTCH2	73	0.0580518	0.243681	0	0	18.1439	51.6451	NCSTN
Signaling by NOTCH	74	0.0601801	0.243681	0	0	5.34431	15.0197	NCSTN;PSMD3
Aquaporin-mediated Transport	75	0.0608671	0.243681	0	0	17.235	48.2419	PRKAR1B
Glucagon-like Peptide-1 (GLP1) Regulates Insulin Secretion	76	0.0608671	0.243681	0	0	17.235	48.2419	PRKAR1B
DARPP-32 Events	77	0.0608671	0.243681	0	0	17.235	48.2419	PRKAR1B
Vasopressin Regulates Renal Water Homeostasis via Aquaporins	78	0.0608671	0.243681	0	0	17.235	48.2419	PRKAR1B
Disease	79	0.061024	0.243681	0	0	2.22454	6.22089	NCSTN;PRKAR1B;IMPDH1;PSMD3;WASF2;YWHAG;BCL2L1
RAS Processing	80	0.0636742	0.243681	0	0	16.4127	45.2002	BCL2L1
SARS-CoV Infections	81	0.0659188	0.243681	0	0	3.46233	9.41523	IMPDH1;YWHAG;BCL2L1
Signaling by Receptor Tyrosine Kinases	82	0.0664213	0.243681	0	0	3.45089	9.35792	NCSTN;SRF;WASF2
Activated NOTCH1 Transmits Signal to the Nucleus	83	0.0664733	0.243681	0	0	15.6652	42.4675	NCSTN
NGF-stimulated Transcription	84	0.0664733	0.243681	0	0	15.6652	42.4675	SRF
FLT3 Signaling in Disease	85	0.0664733	0.243681	0	0	15.6652	42.4675	BCL2L1
Neuronal System	86	0.0666322	0.243681	0	0	5.03498	13.6376	PRKAR1B;CAMKK2
ADORA2B Mediated Anti-Inflammatory Cytokines Production	87	0.0692642	0.243681	0	0	14.9826	40.001	PRKAR1B
FCGR3A-mediated IL10 Synthesis	88	0.0692642	0.243681	0	0	14.9826	40.001	PRKAR1B
Activation of BH3-only Proteins	89	0.0692642	0.243681	0	0	14.9826	40.001	YWHAG
Diseases of Signal Transduction by Growth Factor Receptors and Second Messengers	90	0.0710239	0.243681	0	0	3.35113	8.86288	NCSTN;PSMD3;BCL2L1
GPER1 Signaling	91	0.0720471	0.243681	0	0	14.3569	37.765	PRKAR1B
RHO GTPases Activate PKNs	92	0.0720471	0.243681	0	0	14.3569	37.765	YWHAG
Transcriptional Regulation by NPAS4	93	0.0720471	0.243681	0	0	14.3569	37.765	SRF
Cellular Response to Chemical Stress	94	0.0724606	0.243681	0	0	4.79193	12.5774	PSMD3;BCL2L1
RAF MAP Kinase Cascade	95	0.0758641	0.243681	0	0	4.66317	12.0254	PSMD3;BCL2L1
G2 M Transition	96	0.0801901	0.243681	0	0	4.51149	11.3841	PSMD3;YWHAG
MAPK1 MAPK3 Signaling	97	0.0801901	0.243681	0	0	4.51149	11.3841	PSMD3;BCL2L1
RMTs Methylate Histone Arginines	98	0.0803474	0.243681	0	0	12.758	32.168	WDR77
Mitotic G2-G2 M Phases	99	0.0819421	0.243681	0	0	4.45351	11.1415	PSMD3;YWHAG
Amyloid Fiber Formation	100	0.0830982	0.243681	0	0	12.3012	30.6021	NCSTN
EPH-ephrin Mediated Repulsion of Cells	101	0.0830982	0.243681	0	0	12.3012	30.6021	NCSTN
Intra-Golgi and Retrograde Golgi-to-ER Traffic	102	0.0854822	0.243681	0	0	4.34185	10.6785	SNAP29;STX10
Cilium Assembly	103	0.0863745	0.243681	0	0	4.31479	10.5672	IFT27;YWHAG
Signaling by NOTCH3	104	0.0885759	0.243681	0	0	11.4789	27.8236	NCSTN
Cross-presentation of Soluble Exogenous Antigens (Endosomes)	105	0.0885759	0.243681	0	0	11.4789	27.8236	PSMD3
Signaling by TGFBR3	106	0.0913029	0.243681	0	0	11.1075	26.5867	NCSTN
Signaling by ERBB4	107	0.094022	0.243681	0	0	10.7594	25.4376	NCSTN
RHO GTPases Activate WASPs and WAVEs	108	0.094022	0.243681	0	0	10.7594	25.4376	WASF2
Signaling by WNT	109	0.0991611	0.243681	0	0	3.96805	9.1702	PSMD3;CCDC88C
Degradation of the Extracellular Matrix	110	0.0994365	0.243681	0	0	10.1245	23.3698	NCSTN
Regulation of Activated PAK-2p34 by Proteasome Mediated Degradation	111	0.0994365	0.243681	0	0	10.1245	23.3698	PSMD3
Regulation of Ornithine Decarboxylase (ODC)	112	0.0994365	0.243681	0	0	10.1245	23.3698	PSMD3
Somitogenesis	113	0.102132	0.243681	0	0	9.83429	22.4368	PSMD3
Ubiquitin-dependent Degradation of Cyclin D	114	0.102132	0.243681	0	0	9.83429	22.4368	PSMD3
Drug ADME	115	0.102132	0.243681	0	0	9.83429	22.4368	IMPDH1
p53-Independent DNA Damage Response	116	0.10482	0.243681	0	0	9.56019	21.5631	PSMD3
p53-Independent G1 S DNA Damage Checkpoint	117	0.10482	0.243681	0	0	9.56019	21.5631	PSMD3
Autodegradation of the E3 Ubiquitin Ligase COP1	118	0.10482	0.243681	0	0	9.56019	21.5631	PSMD3
Intra-Golgi Traffic	119	0.10482	0.243681	0	0	9.56019	21.5631	SNAP29
Ubiquitin Mediated Degradation of Phosphorylated Cdc25A	120	0.10482	0.243681	0	0	9.56019	21.5631	PSMD3
Regulation of Insulin Secretion	121	0.10482	0.243681	0	0	9.56019	21.5631	PRKAR1B
Vpu Mediated Degradation of CD4	122	0.10482	0.243681	0	0	9.56019	21.5631	PSMD3
Regulation of Apoptosis	123	0.1075	0.243681	0	0	9.3009	20.7435	PSMD3
Viral Infection Pathways	124	0.107582	0.243681	0	0	2.36818	5.27986	IMPDH1;PSMD3;YWHAG;BCL2L1
MAPK Family Signaling Cascades	125	0.107651	0.243681	0	0	3.77271	8.40884	PSMD3;BCL2L1
AUF1 (hnRNP D0) Binds and Destabilizes mRNA	126	0.110172	0.243681	0	0	9.05526	19.9733	PSMD3
FBXL7 Down-Regulates AURKA During Mitotic Entry and in Early Mitosis	127	0.110172	0.243681	0	0	9.05526	19.9733	PSMD3
Intraflagellar Transport	128	0.110172	0.243681	0	0	9.05526	19.9733	IFT27
Vif-mediated Degradation of APOBEC3G	129	0.110172	0.243681	0	0	9.05526	19.9733	PSMD3
SCF-beta-TrCP Mediated Degradation of Emi1	130	0.112836	0.243681	0	0	8.82222	19.2485	PSMD3
Nuclear Events (Kinase and Transcription Factor Activation)	131	0.112836	0.243681	0	0	8.82222	19.2485	SRF
GSK3B and BTRC CUL1-mediated-degradation of NFE2L2	132	0.112836	0.243681	0	0	8.82222	19.2485	PSMD3
Hh Mutants Abrogate Ligand Secretion	133	0.112836	0.243681	0	0	8.82222	19.2485	PSMD3
Hh Mutants Are Degraded by ERAD	134	0.112836	0.243681	0	0	8.82222	19.2485	PSMD3
Stabilization of P53	135	0.112836	0.243681	0	0	8.82222	19.2485	PSMD3
Degradation of AXIN	136	0.112836	0.243681	0	0	8.82222	19.2485	PSMD3
GPCR Downstream Signalling	137	0.114388	0.243681	0	0	3.63338	7.87773	PRKAR1B;CAMKK2
Negative Regulation of NOTCH4 Signaling	138	0.115493	0.243681	0	0	8.60083	18.5653	PSMD3
Asymmetric Localization of PCP Proteins	139	0.115493	0.243681	0	0	8.60083	18.5653	PSMD3
Degradation of DVL	140	0.115493	0.243681	0	0	8.60083	18.5653	PSMD3
Hedgehog Ligand Biogenesis	141	0.118142	0.243681	0	0	8.39024	17.9205	PSMD3
Regulation of RUNX3 Expression and Activity	142	0.118142	0.243681	0	0	8.39024	17.9205	PSMD3
GLI3 Is Processed to GLI3R by the Proteasome	143	0.120783	0.243681	0	0	8.18968	17.311	PSMD3
High Laminar Flow Shear Stress Activates Signaling by PIEZO1 and PECAM1 CDH5 KDR in Endothelial Cell	144	0.120783	0.243681	0	0	8.18968	17.311	PRKAR1B
Defective CFTR Causes Cystic Fibrosis	145	0.120783	0.243681	0	0	8.18968	17.311	PSMD3
Degradation of GLI1 by the Proteasome	146	0.120783	0.243681	0	0	8.18968	17.311	PSMD3
Degradation of GLI2 by the Proteasome	147	0.120783	0.243681	0	0	8.18968	17.311	PSMD3
Metabolism of Polyamines	148	0.120783	0.243681	0	0	8.18968	17.311	PSMD3
NIK-->noncanonical NF-kB Signaling	149	0.123417	0.243681	0	0	7.99845	16.7343	PSMD3
SCF(Skp2)-mediated Degradation of P27 P21	150	0.123417	0.243681	0	0	7.99845	16.7343	PSMD3
FOXO-mediated Transcription	151	0.123417	0.243681	0	0	7.99845	16.7343	YWHAG
Retrograde Transport at the Trans-Golgi-Network	152	0.126043	0.243681	0	0	7.81591	16.1878	STX10
Formation of Paraxial Mesoderm	153	0.126043	0.243681	0	0	7.81591	16.1878	PSMD3
Anti-inflammatory Response Favouring Leishmania Parasite Infection	154	0.126043	0.243681	0	0	7.81591	16.1878	PRKAR1B
Dectin-1 Mediated Noncanonical NF-kB Signaling	155	0.126043	0.243681	0	0	7.81591	16.1878	PSMD3
Leishmania Parasite Growth and Survival	156	0.126043	0.243681	0	0	7.81591	16.1878	PRKAR1B
Signaling by GPCR	157	0.128183	0.243681	0	0	3.38298	6.94964	PRKAR1B;CAMKK2
p53-Dependent G1 DNA Damage Response	158	0.128661	0.243681	0	0	7.64148	15.6694	PSMD3
p53-Dependent G1 S DNA Damage Checkpoint	159	0.128661	0.243681	0	0	7.64148	15.6694	PSMD3
Regulation of RAS by GAPs	160	0.128661	0.243681	0	0	7.64148	15.6694	PSMD3
ABC Transporter Disorders	161	0.131272	0.243681	0	0	7.47464	15.1771	PSMD3
Signaling by NOTCH1 HD+PEST Domain Mutants in Cancer	162	0.131272	0.243681	0	0	7.47464	15.1771	NCSTN
Signaling by NOTCH1 PEST Domain Mutants in Cancer	163	0.131272	0.243681	0	0	7.47464	15.1771	NCSTN
Signaling by NOTCH1 in Cancer	164	0.131272	0.243681	0	0	7.47464	15.1771	NCSTN
Proteasome Assembly	165	0.131272	0.243681	0	0	7.47464	15.1771	PSMD3
Constitutive Signaling by NOTCH1 HD+PEST Domain Mutants	166	0.131272	0.243681	0	0	7.47464	15.1771	NCSTN
Constitutive Signaling by NOTCH1 PEST Domain Mutants	167	0.131272	0.243681	0	0	7.47464	15.1771	NCSTN
Metabolism of RNA	168	0.132956	0.243681	0	0	2.17755	4.39373	RBM39;PDCD11;PSMD3;WDR77
Extra-nuclear Estrogen Signaling	169	0.133875	0.243681	0	0	7.31489	14.7091	SRF
Nucleotide-binding Domain, Leucine Rich Repeat Containing Receptor (NLR) Signaling Pathways	170	0.133875	0.243681	0	0	7.31489	14.7091	BCL2L1
G1 S DNA Damage Checkpoints	171	0.133875	0.243681	0	0	7.31489	14.7091	PSMD3
Oxygen-dependent Proline Hydroxylation of Hypoxia-inducible Factor Alpha	172	0.133875	0.243681	0	0	7.31489	14.7091	PSMD3
Interleukin-4 and Interleukin-13 Signaling	173	0.133875	0.243681	0	0	7.31489	14.7091	BCL2L1
G Alpha (S) Signalling Events	174	0.136471	0.243681	0	0	7.16181	14.2638	PRKAR1B
RUNX1 Regulates Transcription of Genes Involved in Differentiation of HSCs	175	0.136471	0.243681	0	0	7.16181	14.2638	PSMD3
Regulation of PTEN Stability and Activity	176	0.136471	0.243681	0	0	7.16181	14.2638	PSMD3
FCGR3A-mediated Phagocytosis	177	0.139059	0.243681	0	0	7.01497	13.8395	WASF2
Parasite Infection	178	0.139059	0.243681	0	0	7.01497	13.8395	WASF2
Leishmania Phagocytosis	179	0.139059	0.243681	0	0	7.01497	13.8395	WASF2
Regulation of RUNX2 Expression and Activity	180	0.139059	0.243681	0	0	7.01497	13.8395	PSMD3
Cell Cycle Checkpoints	181	0.141334	0.243681	0	0	3.179	6.22011	PSMD3;YWHAG
snRNP Assembly	182	0.14164	0.243681	0	0	6.874	13.435	WDR77
Activation of NF-kappaB in B Cells	183	0.14164	0.243681	0	0	6.874	13.435	PSMD3
Cell Death Signalling via NRAGE, NRIF and NADE	184	0.14164	0.243681	0	0	6.874	13.435	NCSTN
The Role of GTSE1 in G2 M Progression After G2 Checkpoint	185	0.14164	0.243681	0	0	6.874	13.435	PSMD3
Metabolism of Non-Coding RNA	186	0.14164	0.243681	0	0	6.874	13.435	WDR77
G2 M DNA Damage Checkpoint	187	0.144213	0.24417	0	0	6.73856	13.049	YWHAG
Autodegradation of Cdh1 by Cdh1 APC C	188	0.144213	0.24417	0	0	6.73856	13.049	PSMD3
Regulation of Actin Dynamics for Phagocytic Cup Formation	189	0.144213	0.24417	0	0	6.73856	13.049	WASF2
APC C Cdc20 Mediated Degradation of Securin	190	0.146779	0.247206	0	0	6.60833	12.6803	PSMD3
rRNA Modification in the Nucleus and Cytosol	191	0.149337	0.24798	0	0	6.48302	12.3278	PDCD11
Cellular Response to Hypoxia	192	0.149337	0.24798	0	0	6.48302	12.3278	PSMD3
Orc1 Removal From Chromatin	193	0.151888	0.24798	0	0	6.36235	11.9906	PSMD3
Integration of Energy Metabolism	194	0.151888	0.24798	0	0	6.36235	11.9906	PRKAR1B
Translocation of SLC2A4 (GLUT4) to the Plasma Membrane	195	0.151888	0.24798	0	0	6.36235	11.9906	YWHAG
ER-Phagosome Pathway	196	0.151888	0.24798	0	0	6.36235	11.9906	PSMD3
Organelle Biogenesis and Maintenance	197	0.15373	0.249714	0	0	3.011	5.63827	IFT27;YWHAG
CDK-mediated Phosphorylation and Removal of Cdc6	198	0.156967	0.251237	0	0	6.13393	11.3583	PSMD3
Cdc20 Phospho-APC C Mediated Degradation of Cyclin A	199	0.156967	0.251237	0	0	6.13393	11.3583	PSMD3
APC Cdc20 Mediated Degradation of Cell Cycle Proteins Prior to Satisfation of the Checkpoint	200	0.159496	0.251237	0	0	6.02573	11.0617	PSMD3
APC C Cdh1 Mediated Degradation of Cdc20 and Other APC C Cdh1 Targets in Late Mitosis Early G1	201	0.162017	0.251237	0	0	5.92126	10.777	PSMD3
Signaling by NOTCH1	202	0.162017	0.251237	0	0	5.92126	10.777	NCSTN
Hedgehog 'On' State	203	0.162017	0.251237	0	0	5.92126	10.777	PSMD3
EPH-Ephrin Signaling	204	0.162017	0.251237	0	0	5.92126	10.777	NCSTN
Signaling by Rho GTPases	205	0.164045	0.251237	0	0	2.26488	4.09403	SRF;WASF2;YWHAG
Cytokine Signaling in Immune System	206	0.164045	0.251237	0	0	2.26488	4.09403	MAP3K3;PSMD3;BCL2L1
APC C Cdc20 Mediated Degradation of Mitotic Proteins	207	0.164531	0.251237	0	0	5.82034	10.5037	PSMD3
Activation of APC C and APC C Cdc20 Mediated Degradation of Mitotic Proteins	208	0.167038	0.251237	0	0	5.72278	10.2411	PSMD3
Gastrulation	209	0.167038	0.251237	0	0	5.72278	10.2411	PSMD3
ABC-family Proteins Mediated Transport	210	0.169537	0.251237	0	0	5.62842	9.98864	PSMD3
FCERI Mediated NF-kB Activation	211	0.169537	0.251237	0	0	5.62842	9.98864	PSMD3
Antigen processing-Cross Presentation	212	0.169537	0.251237	0	0	5.62842	9.98864	PSMD3
PCP CE Pathway	213	0.169537	0.251237	0	0	5.62842	9.98864	PSMD3
TNFR2 Non-Canonical NF-kB Pathway	214	0.17203	0.251237	0	0	5.5371	9.74578	PSMD3
Downstream Signaling Events of B Cell Receptor (BCR)	215	0.17203	0.251237	0	0	5.5371	9.74578	PSMD3
Signaling by Rho GTPases, Miro GTPases and RHOBTB3	216	0.174338	0.251237	0	0	2.19598	3.83586	SRF;WASF2;YWHAG
Response of Endothelial Cells to Shear Stress	217	0.174515	0.251237	0	0	5.44868	9.51201	PRKAR1B
Cellular Responses to Mechanical Stimuli	218	0.174515	0.251237	0	0	5.44868	9.51201	PRKAR1B
RAC2 GTPase Cycle	219	0.174515	0.251237	0	0	5.44868	9.51201	WASF2
Cyclin E Associated Events During G1 S Transition	220	0.174515	0.251237	0	0	5.44868	9.51201	PSMD3
Loss of Nlp From Mitotic Centrosomes	221	0.174515	0.251237	0	0	5.44868	9.51201	YWHAG
Loss of Proteins Required for Interphase Microtubule Organization From the Centrosome	222	0.174515	0.251237	0	0	5.44868	9.51201	YWHAG
Membrane Trafficking	223	0.175081	0.251237	0	0	2.19122	3.81821	SNAP29;YWHAG;STX10
MAPK6 MAPK4 Signaling	224	0.176992	0.251722	0	0	5.36302	9.28687	PSMD3
Regulation of APC C Activators Between G1 S and Early Anaphase	225	0.176992	0.251722	0	0	5.36302	9.28687	PSMD3
RAC3 GTPase Cycle	226	0.179463	0.251878	0	0	5.28	9.06991	WASF2
Cyclin A Cdk2-associated Events at S Phase Entry	227	0.179463	0.251878	0	0	5.28	9.06991	PSMD3
UCH Proteinases	228	0.179463	0.251878	0	0	5.28	9.06991	PSMD3
Vesicle-mediated Transport	229	0.181056	0.252019	0	0	2.15377	3.68068	SNAP29;YWHAG;STX10
AURKA Activation by TPX2	230	0.181926	0.252019	0	0	5.19949	8.86074	YWHAG
Degradation of Beta-Catenin by the Destruction Complex	231	0.181926	0.252019	0	0	5.19949	8.86074	PSMD3
Transcriptional Regulation by RUNX3	232	0.184382	0.254321	0	0	5.12139	8.65896	PSMD3
P75 NTR Receptor-Mediated Signalling	233	0.186832	0.254409	0	0	5.04559	8.46422	NCSTN
TP53 Regulates Metabolic Genes	234	0.186832	0.254409	0	0	5.04559	8.46422	YWHAG
Downstream TCR Signaling	235	0.186832	0.254409	0	0	5.04559	8.46422	PSMD3
Fcgamma Receptor (FCGR) Dependent Phagocytosis	236	0.189273	0.255559	0	0	4.97198	8.27617	WASF2
Regulation of mRNA Stability by Proteins That Bind AU-rich Elements	237	0.189273	0.255559	0	0	4.97198	8.27617	PSMD3
APC C-mediated Degradation of Cell Cycle Proteins	238	0.194136	0.258848	0	0	4.83099	7.91893	PSMD3
Assembly of the Pre-Replicative Complex	239	0.194136	0.258848	0	0	4.83099	7.91893	PSMD3
Regulation of Mitotic Cell Cycle	240	0.194136	0.258848	0	0	4.83099	7.91893	PSMD3
Centrosome Maturation	241	0.201377	0.266157	0	0	4.63378	7.42599	YWHAG
Recruitment of Mitotic Centrosome Proteins and Complexes	242	0.201377	0.266157	0	0	4.63378	7.42599	YWHAG
Switching of Origins to a Post-Replicative State	243	0.203777	0.266157	0	0	4.57156	7.27211	PSMD3
Transcriptional Regulation by RUNX2	244	0.203777	0.266157	0	0	4.57156	7.27211	PSMD3
Metabolism of Nucleotides	245	0.203777	0.266157	0	0	4.57156	7.27211	IMPDH1
Recruitment of NuMA to Mitotic Centrosomes	246	0.208555	0.270193	0	0	4.45195	6.97866	YWHAG
VEGFA-VEGFR2 Pathway	247	0.208555	0.270193	0	0	4.45195	6.97866	WASF2
Potential Therapeutics for SARS	248	0.210934	0.272173	0	0	4.39444	6.83868	IMPDH1
CLEC7A (Dectin-1) Signaling	249	0.215671	0.276059	0	0	4.28375	6.57128	PSMD3
Regulation of PLK1 Activity at G2 M Transition	250	0.215671	0.276059	0	0	4.28375	6.57128	YWHAG
Signaling by VEGF	251	0.218029	0.277965	0	0	4.23045	6.44352	WASF2
Signaling by NTRK1 (TRKA)	252	0.22038	0.279848	0	0	4.17846	6.3195	SRF
Signaling by the B Cell Receptor (BCR)	253	0.225062	0.284663	0	0	4.07817	6.08211	PSMD3
DNA Replication Pre-Initiation	254	0.232034	0.292326	0	0	3.9364	5.75057	PSMD3
Extracellular Matrix Organization	255	0.234344	0.29293	0	0	3.89129	5.64612	NCSTN
TCR Signaling	256	0.234344	0.29293	0	0	3.89129	5.64612	PSMD3
Anchoring of the Basal Body to the Plasma Membrane	257	0.236648	0.294659	0	0	3.84719	5.5445	YWHAG
M Phase	258	0.238297	0.295562	0	0	2.23604	3.20701	PSMD3;YWHAG
Signaling by NTRKs	259	0.243519	0.300873	0	0	3.72065	5.25564	SRF
Factors Involved in Megakaryocyte Development and Platelet Production	260	0.245796	0.302518	0	0	3.68029	5.16437	PRKAR1B
C-type Lectin Receptors (CLRs)	261	0.248066	0.304143	0	0	3.64078	5.07546	PSMD3
Disorders of Transmembrane Transporters	262	0.252587	0.308504	0	0	3.56424	4.90438	PSMD3
Axon Guidance	263	0.257237	0.312988	0	0	2.11621	2.8733	NCSTN;PSMD3
Beta-catenin Independent WNT Signaling	264	0.263775	0.319727	0	0	3.38614	4.51257	PSMD3
Synthesis of DNA	265	0.270409	0.325583	0	0	3.2875	4.29945	PSMD3
Nervous System Development	266	0.270641	0.325583	0	0	2.03886	2.66471	NCSTN;PSMD3
Fc Epsilon Receptor (FCERI) Signaling	267	0.272608	0.326721	0	0	3.25587	4.23172	PSMD3
G1 S Transition	268	0.281339	0.335927	0	0	3.13517	3.97601	PSMD3
Transport of Small Molecules	269	0.284052	0.337318	0	0	1.96679	2.4754	PRKAR1B;PSMD3
Host Interactions of HIV Factors	270	0.285666	0.337318	0	0	3.07808	3.85662	PSMD3
DNA Replication	271	0.285666	0.337318	0	0	3.07808	3.85662	PSMD3
PTEN Regulation	272	0.28782	0.338612	0	0	3.0503	3.7989	PSMD3
Signaling by TGFB Family Members	273	0.289968	0.339889	0	0	3.02301	3.74244	NCSTN
RHO GTPases Activate Formins	274	0.298497	0.348467	0	0	2.91852	3.52848	SRF
Developmental Biology	275	0.299464	0.348467	0	0	1.63011	1.96553	NCSTN;SRF;PSMD3
Death Receptor Signaling	276	0.304828	0.353424	0	0	2.84472	3.37955	NCSTN
Mitotic G1 Phase and G1 S Transition	277	0.309018	0.355704	0	0	2.79754	3.28531	PSMD3
ESR-mediated Signaling	278	0.309018	0.355704	0	0	2.79754	3.28531	SRF
Transcriptional Regulation by RUNX1	279	0.311104	0.356527	0	0	2.77453	3.23961	PSMD3
Cellular Responses to Stimuli	280	0.311961	0.356527	0	0	1.59027	1.85247	PRKAR1B;PSMD3;BCL2L1
RAC1 GTPase Cycle	281	0.313184	0.356651	0	0	2.75188	3.19484	WASF2
Ub-specific Processing Proteases	282	0.329605	0.37402	0	0	2.58308	2.86686	PSMD3
Regulation of Expression of SLITs and ROBOs	283	0.337673	0.381821	0	0	2.50613	2.72085	PSMD3
S Phase	284	0.345646	0.389461	0	0	2.43357	2.58528	PSMD3
SARS-CoV-2-host Interactions	285	0.361316	0.405688	0	0	2.30023	2.34164	YWHAG
Cell Cycle, Mitotic	286	0.377964	0.422032	0	0	1.56991	1.52746	PSMD3;YWHAG
Separation of Sister Chromatids	287	0.37851	0.422032	0	0	2.16645	2.10474	PSMD3
Signaling by Nuclear Receptors	288	0.386007	0.428897	0	0	2.1118	2.01022	SRF
Signaling by ROBO Receptors	289	0.397089	0.438167	0	0	2.03473	1.87927	PSMD3
Major Pathway of rRNA Processing in the Nucleolus and Cytosol	290	0.397089	0.438167	0	0	2.03473	1.87927	PDCD11
Mitotic Prometaphase	291	0.41513	0.454937	0	0	1.91789	1.68614	YWHAG
rRNA Processing in the Nucleus and Cytosol	292	0.41513	0.454937	0	0	1.91789	1.68614	PDCD11
PIP3 Activates AKT Signaling	293	0.425703	0.461779	0	0	1.85392	1.58327	PSMD3
Chromatin Modifying Enzymes	294	0.425703	0.461779	0	0	1.85392	1.58327	WDR77
Chromatin Organization	295	0.425703	0.461779	0	0	1.85392	1.58327	WDR77
Neddylation	296	0.434372	0.469591	0	0	1.80372	1.50404	PSMD3
mRNA Splicing - Major Pathway	297	0.437804	0.471708	0	0	1.78439	1.47387	RBM39
Deubiquitination	298	0.444608	0.477431	0	0	1.74691	1.41598	PSMD3
Generic Transcription Pathway	299	0.447967	0.478232	0	0	1.24996	1.00376	SRF;PSMD3;YWHAG
rRNA Processing	300	0.449658	0.478232	0	0	1.7198	1.37458	PDCD11
Mitotic Anaphase	301	0.451332	0.478232	0	0	1.71094	1.36114	PSMD3
mRNA Splicing	302	0.451332	0.478232	0	0	1.71094	1.36114	RBM39
Mitotic Metaphase and Anaphase	303	0.453	0.478416	0	0	1.70218	1.34789	PSMD3
HIV Infection	304	0.454664	0.478594	0	0	1.6935	1.33481	PSMD3
SARS-CoV-2 Infection	305	0.48221	0.505925	0	0	1.55822	1.13653	YWHAG
Cell Cycle	306	0.489025	0.511399	0	0	1.24697	0.892007	PSMD3;YWHAG
Metabolism of Amino Acids and Derivatives	307	0.506902	0.528367	0	0	1.44893	0.984455	PSMD3
Antigen Processing Ubiquitination & Proteasome Degradation	308	0.520286	0.540557	0	0	1.3938	0.910676	PSMD3
Cellular Responses to Stress	309	0.53408	0.553093	0	0	1.14214	0.716361	PSMD3;BCL2L1
RNA Polymerase II Transcription	310	0.536384	0.553686	0	0	1.08524	0.676001	SRF;PSMD3;YWHAG
Processing of Capped Intron-Containing Pre-mRNA	311	0.552914	0.568914	0	0	1.26994	0.752506	RBM39
Class I MHC Mediated Antigen Processing & Presentation	312	0.578237	0.593063	0	0	1.18275	0.647875	PSMD3
Transcriptional Regulation by TP53	313	0.597243	0.6106	0	0	1.12174	0.57818	YWHAG
RHO GTPase Cycle	314	0.613042	0.624756	0	0	1.07361	0.525341	WASF2
Hemostasis	315	0.623627	0.633526	0	0	1.04258	0.492307	PRKAR1B
Gene Expression (Transcription)	316	0.659269	0.667614	0	0	0.893855	0.372401	SRF;PSMD3;YWHAG
Adaptive Immune System	317	0.793609	0.800142	0	0	0.638586	0.147618	PSMD3
Metabolism	318	0.795141	0.800142	0	0	0.704933	0.161596	PRKAR1B;IMPDH1;PSMD3
Metabolism of Proteins	319	0.934436	0.937365	0	0	0.442525	0.0300086	NCSTN;PSMD3
Post-translational Protein Modification	320	0.955023	0.955023	0	0	0.316582	0.014569	PSMD3

## Sheet: UniqueJurkat_GO
Term	Rank	P.value	Adjusted.P.value	Old.P.value	Old.Adjusted.P.value	Odds.Ratio	Combined.Score	Genes
Signaling by Interleukins	1	0.00293704	0.110492	0	0	7.74483	45.1551	RPS6KA3;IRS1;NLRC5;BCL2
Neuronal System	2	0.00409686	0.110492	0	0	10.5128	57.7947	RPS6KA3;DBNL;GIT1
Post NMDA Receptor Activation Events	3	0.00435676	0.110492	0	0	22.898	124.474	RPS6KA3;GIT1
IRS Activation	4	0.00461376	0.110492	0	0	450.739	2424.4	IRS1
MECP2 Regulates Transcription Factors	5	0.00461376	0.110492	0	0	450.739	2424.4	MECP2
Immune System	6	0.0046723	0.110492	0	0	3.76667	20.2123	FBXW4;RPS6KA3;DBNL;MGRN1;IRS1;NLRC5;BCL2;RBCK1
Activation of NMDA Receptors and Postsynaptic Events	7	0.00540421	0.110492	0	0	20.3992	106.496	RPS6KA3;GIT1
Activated NTRK3 Signals Through PI3K	8	0.00920715	0.110492	0	0	150.217	704.185	IRS1
RSK Activation	9	0.00920715	0.110492	0	0	150.217	704.185	RPS6KA3
MECP2 Regulates Transcription of Neuronal Ligands	10	0.00920715	0.110492	0	0	150.217	704.185	MECP2
SUMO Is Conjugated to E1 (UBA2 SAE1)	11	0.0114962	0.110492	0	0	112.652	503.075	SAE1
CREB Phosphorylation	12	0.0114962	0.110492	0	0	112.652	503.075	RPS6KA3
Activation of RAC1 Downstream of NMDARs	13	0.0137802	0.110492	0	0	90.113	386.091	GIT1
SOS-mediated Signalling	14	0.0137802	0.110492	0	0	90.113	386.091	IRS1
MyD88 Cascade Initiated on Plasma Membrane	15	0.0144747	0.110492	0	0	11.993	50.7946	RPS6KA3;NLRC5
Signaling by ALK Fusions and Activated Point Mutants	16	0.0144747	0.110492	0	0	11.993	50.7946	MECP2;IRS1
Signaling by ALK in Cancer	17	0.0144747	0.110492	0	0	11.993	50.7946	MECP2;IRS1
Toll Like Receptor 10 (TLR10) Cascade	18	0.0144747	0.110492	0	0	11.993	50.7946	RPS6KA3;NLRC5
Toll Like Receptor 5 (TLR5) Cascade	19	0.0144747	0.110492	0	0	11.993	50.7946	RPS6KA3;NLRC5
MyD88 Dependent Cascade Initiated on Endosome	20	0.0155225	0.110492	0	0	11.5455	48.0922	RPS6KA3;NLRC5
MyD88 MAL(TIRAP) Cascade Initiated on Plasma Membrane	21	0.0155225	0.110492	0	0	11.5455	48.0922	RPS6KA3;NLRC5
Neurotransmitter Receptors and Postsynaptic Signal Transmission	22	0.0155225	0.110492	0	0	11.5455	48.0922	RPS6KA3;GIT1
Signaling by NTRK1 (TRKA)	23	0.0155225	0.110492	0	0	11.5455	48.0922	RPS6KA3;IRS1
TRAF6 Mediated Induction of NFkB and MAP Kinases Upon TLR7 8 or 9 Activation	24	0.0155225	0.110492	0	0	11.5455	48.0922	RPS6KA3;NLRC5
Toll Like Receptor 2 (TLR2) Cascade	25	0.0155225	0.110492	0	0	11.5455	48.0922	RPS6KA3;NLRC5
Toll Like Receptor TLR1 TLR2 Cascade	26	0.0155225	0.110492	0	0	11.5455	48.0922	RPS6KA3;NLRC5
Toll Like Receptor TLR6 TLR2 Cascade	27	0.0155225	0.110492	0	0	11.5455	48.0922	RPS6KA3;NLRC5
Toll Like Receptor 7 8 (TLR7 8) Cascade	28	0.0158788	0.110492	0	0	11.4035	47.2423	RPS6KA3;NLRC5
SUMO Is Transferred From E1 to E2 (UBE2I, UBC9)	29	0.0160592	0.110492	0	0	75.087	310.22	SAE1
Signal Attenuation	30	0.0160592	0.110492	0	0	75.087	310.22	IRS1
PI3K AKT Activation	31	0.0160592	0.110492	0	0	75.087	310.22	IRS1
Loss of MECP2 Binding Ability to the NCoR SMRT Complex	32	0.0160592	0.110492	0	0	75.087	310.22	MECP2
Toll Like Receptor 9 (TLR9) Cascade	33	0.0173393	0.110492	0	0	10.8689	44.0711	RPS6KA3;NLRC5
Toll Like Receptor 3 (TLR3) Cascade	34	0.0177131	0.110492	0	0	10.7429	43.3311	RPS6KA3;NLRC5
Antigen Processing Ubiquitination & Proteasome Degradation	35	0.0177865	0.110492	0	0	6.02857	24.291	FBXW4;MGRN1;RBCK1
BH3-only Proteins Associate With and Inactivate Anti-Apoptotic BCL-2 Members	36	0.0183331	0.110492	0	0	64.354	257.355	BCL2
MyD88-independent TLR4 Cascade	37	0.0188551	0.110492	0	0	10.3818	41.2259	RPS6KA3;NLRC5
TRIF (TICAM1)-mediated TLR4 Signaling	38	0.0188551	0.110492	0	0	10.3818	41.2259	RPS6KA3;NLRC5
Signaling by NTRKs	39	0.0192425	0.110492	0	0	10.2667	40.5601	RPS6KA3;IRS1
NFE2L2 Regulating Tumorigenic Genes	40	0.0206019	0.110492	0	0	56.3043	218.594	BCL2
Signaling by LTK	41	0.0206019	0.110492	0	0	56.3043	218.594	IRS1
Cytokine Signaling in Immune System	42	0.0215277	0.110492	0	0	4.24026	16.2759	RPS6KA3;IRS1;NLRC5;BCL2
Signaling by Leptin	43	0.0228658	0.110492	0	0	50.0435	189.07	IRS1
Caspase-mediated Cleavage of Cytoskeletal Proteins	44	0.0228658	0.110492	0	0	50.0435	189.07	DBNL
Processing and Activation of SUMO	45	0.0228658	0.110492	0	0	50.0435	189.07	SAE1
Toll Like Receptor 4 (TLR4) Cascade	46	0.0245808	0.110492	0	0	8.97203	33.2484	RPS6KA3;NLRC5
Transmission Across Chemical Synapses	47	0.0245808	0.110492	0	0	8.97203	33.2484	RPS6KA3;GIT1
Gastrin-CREB Signalling Pathway via PKC and MAPK	48	0.0251246	0.110492	0	0	45.0348	165.904	RPS6KA3
MECP2 Regulates Neuronal Receptors and Channels	49	0.0251246	0.110492	0	0	45.0348	165.904	MECP2
Class I MHC Mediated Antigen Processing & Presentation	50	0.0269875	0.110492	0	0	5.10942	18.4572	FBXW4;MGRN1;RBCK1
Ephrin Signaling	51	0.0273784	0.110492	0	0	40.9368	147.29	GIT1
Activation of BAD and Translocation to Mitochondria	52	0.0273784	0.110492	0	0	40.9368	147.29	BCL2
Pervasive Developmental Disorders	53	0.0273784	0.110492	0	0	40.9368	147.29	MECP2
Loss of Function of MECP2 in Rett Syndrome	54	0.0273784	0.110492	0	0	40.9368	147.29	MECP2
Disorders of Developmental Biology	55	0.0273784	0.110492	0	0	40.9368	147.29	MECP2
Disorders of Nervous System Development	56	0.0273784	0.110492	0	0	40.9368	147.29	MECP2
Signaling by NTRK3 (TRKC)	57	0.0296273	0.117469	0	0	37.5217	132.041	IRS1
Toll-like Receptor Cascades	58	0.0304545	0.118668	0	0	7.96503	27.8101	RPS6KA3;NLRC5
CREB1 Phosphorylation Through NMDA Receptor-Mediated Activation of RAS Signaling	59	0.0318711	0.122083	0	0	34.6321	119.344	RPS6KA3
Inflammasomes	60	0.03411	0.125104	0	0	32.1553	108.626	BCL2
Regulation of MITF-M-dependent Genes Involved in Apoptosis	61	0.03411	0.125104	0	0	32.1553	108.626	BCL2
Apoptosis	62	0.0343206	0.125104	0	0	7.44945	25.1196	DBNL;BCL2
Estrogen-dependent Nuclear Events Downstream of ESR-membrane Signaling	63	0.0363439	0.130376	0	0	30.0087	99.4707	BCL2
Growth Hormone Receptor Signaling	64	0.0385728	0.133261	0	0	28.1304	91.5704	IRS1
ERK MAPK Targets	65	0.0385728	0.133261	0	0	28.1304	91.5704	RPS6KA3
Axon Guidance	66	0.0389169	0.133261	0	0	4.40053	14.2855	RPS15;RPS6KA3;GIT1
Regulation of NF-kappa B Signaling	67	0.0407969	0.137613	0	0	26.4731	84.6916	NLRC5
Nervous System Development	68	0.0425734	0.141494	0	0	4.23922	13.3812	RPS15;RPS6KA3;GIT1
Cellular Responses to Stress	69	0.044679	0.141972	0	0	3.32653	10.3397	RPS15;RPS6KA3;TATDN2;BCL2
Neurexins and Neuroligins	70	0.0452301	0.141972	0	0	23.6819	73.319	DBNL
PI3K Cascade	71	0.0452301	0.141972	0	0	23.6819	73.319	IRS1
Interleukin-7 Signaling	72	0.0452301	0.141972	0	0	23.6819	73.319	IRS1
Programmed Cell Death	73	0.0469839	0.145457	0	0	6.2349	19.066	DBNL;BCL2
Signaling by ALK	74	0.0496437	0.149593	0	0	21.4224	64.3288	IRS1
TNFR1-induced Proapoptotic Signaling	75	0.0496437	0.149593	0	0	21.4224	64.3288	RBCK1
IRS-mediated Signalling	76	0.0518432	0.152211	0	0	20.4466	60.5125	IRS1
Innate Immune System	77	0.0538089	0.152211	0	0	3.11776	9.11108	RPS6KA3;DBNL;NLRC5;BCL2
Activation of BH3-only Proteins	78	0.0540378	0.152211	0	0	19.5558	57.0651	BCL2
IRS-related Events Triggered by IGF1R	79	0.0540378	0.152211	0	0	19.5558	57.0651	IRS1
Signaling by Type 1 Insulin-like Growth Factor 1 Receptor (IGF1R)	80	0.0562275	0.152211	0	0	18.7391	53.9378	IRS1
Carboxyterminal Post-Translational Modifications of Tubulin	81	0.0562275	0.152211	0	0	18.7391	53.9378	TTLL1
IGF1R Signaling Cascade	82	0.0562275	0.152211	0	0	18.7391	53.9378	IRS1
MAPK Targets Nuclear Events Mediated by MAP Kinases	83	0.0562275	0.152211	0	0	18.7391	53.9378	RPS6KA3
Major Pathway of rRNA Processing in the Nucleolus and Cytosol	84	0.0568411	0.152211	0	0	5.58708	16.0209	RPS15;WDR3
Developmental Biology	85	0.0572475	0.152211	0	0	3.05016	8.72458	RPS15;RPS6KA3;BCL2;GIT1
Insulin Receptor Signalling Cascade	86	0.0584124	0.153502	0	0	17.9878	51.0895	IRS1
Apoptotic Cleavage of Cellular Proteins	87	0.0605924	0.154644	0	0	17.2943	48.4861	DBNL
Cellular Responses to Stimuli	88	0.0613636	0.154644	0	0	2.9755	8.30443	RPS15;RPS6KA3;TATDN2;BCL2
Constitutive Signaling by Aberrant PI3K in Cancer	89	0.0627676	0.154644	0	0	16.6522	46.0985	IRS1
RMTs Methylate Histone Arginines	90	0.0627676	0.154644	0	0	16.6522	46.0985	PRMT6
Regulation of MECP2 Expression and Activity	91	0.0627676	0.154644	0	0	16.6522	46.0985	MECP2
rRNA Processing in the Nucleus and Cytosol	92	0.0629525	0.154644	0	0	5.26446	14.5582	RPS15;WDR3
RUNX1 Regulates Genes Involved in Megakaryocyte Differentiation and Platelet Function	93	0.0649379	0.154987	0	0	16.0559	43.902	PRMT6
TNFR1-induced NF-kappa-B Signaling Pathway	94	0.0671035	0.154987	0	0	15.5007	41.8756	RBCK1
RHOV GTPase Cycle	95	0.0671035	0.154987	0	0	15.5007	41.8756	GIT1
Recycling Pathway of L1	96	0.0671035	0.154987	0	0	15.5007	41.8756	RPS6KA3
SARS-CoV-1 Modulates Host Translation Machinery	97	0.0692642	0.154987	0	0	14.9826	40.001	RPS15
Nuclear Events Stimulated by ALK Signaling in Cancer	98	0.0692642	0.154987	0	0	14.9826	40.001	MECP2
Association of TriC CCT With Target Proteins During Biosynthesis	99	0.0692642	0.154987	0	0	14.9826	40.001	FBXW4
Protein-protein Interactions at Synapses	100	0.0692642	0.154987	0	0	14.9826	40.001	DBNL
Termination of Translesion DNA Synthesis	101	0.0692642	0.154987	0	0	14.9826	40.001	USP10
Negative Regulators of DDX58 IFIH1 Signaling	102	0.0735713	0.163011	0	0	14.0435	36.6465	NLRC5
RHOU GTPase Cycle	103	0.0757176	0.164747	0	0	13.6166	35.141	GIT1
rRNA Processing	104	0.0758126	0.164747	0	0	4.718	12.17	RPS15;WDR3
Apoptotic Execution Phase	105	0.0778592	0.167583	0	0	13.2148	33.7355	DBNL
TAK1-dependent IKK and NF-kappa-B Activation	106	0.0821282	0.173467	0	0	12.4783	31.1891	NLRC5
Translesion Synthesis by Y Family DNA Polymerases Bypasses Lesions on DNA Template	107	0.0821282	0.173467	0	0	12.4783	31.1891	USP10
Transcriptional Regulation by MECP2	108	0.0842556	0.176313	0	0	12.1398	30.0327	MECP2
XBP1(S) Activates Chaperone Genes	109	0.0863782	0.179096	0	0	11.8192	28.9455	TATDN2
Nuclear Events (Kinase and Transcription Factor Activation)	110	0.0884961	0.180181	0	0	11.5151	27.9217	RPS6KA3
RHOJ GTPase Cycle	111	0.0884961	0.180181	0	0	11.5151	27.9217	GIT1
Senescence-Associated Secretory Phenotype (SASP)	112	0.0906094	0.181219	0	0	11.2261	26.9561	RPS6KA3
IRE1alpha Activates Chaperones	113	0.0906094	0.181219	0	0	11.2261	26.9561	TATDN2
RHOQ GTPase Cycle	114	0.0927179	0.182211	0	0	10.9512	26.0441	GIT1
Intrinsic Pathway for Apoptosis	115	0.0927179	0.182211	0	0	10.9512	26.0441	BCL2
SARS-CoV-2 Modulates Host Translation Machinery	116	0.0948217	0.184739	0	0	10.6894	25.1817	RPS15
Formation of the Ternary Complex, and Subsequently, the 43S Complex	117	0.0969209	0.187215	0	0	10.4398	24.3651	RPS15
Regulation of TNFR1 Signaling	118	0.0990154	0.18964	0	0	10.2016	23.591	RBCK1
DNA Damage Bypass	119	0.101105	0.192015	0	0	9.97391	22.8562	USP10
Signaling by Insulin Receptor	120	0.10319	0.193425	0	0	9.75614	22.158	IRS1
Extra-nuclear Estrogen Signaling	121	0.105271	0.193425	0	0	9.54764	21.4938	BCL2
Nucleotide-binding Domain, Leucine Rich Repeat Containing Receptor (NLR) Signaling Pathways	122	0.105271	0.193425	0	0	9.54764	21.4938	BCL2
Interleukin-4 and Interleukin-13 Signaling	123	0.105271	0.193425	0	0	9.54764	21.4938	BCL2
Peroxisomal Protein Import	124	0.107347	0.195648	0	0	9.34783	20.8614	PEX6
PI5P, PP2A and IER3 Regulate PI3K AKT Signaling	125	0.109418	0.196841	0	0	9.15617	20.2587	IRS1
Ribosomal Scanning and Start Codon Recognition	126	0.111485	0.196841	0	0	8.97217	19.6837	RPS15
PI3K AKT Signaling in Cancer	127	0.111485	0.196841	0	0	8.97217	19.6837	IRS1
Translation Initiation Complex Formation	128	0.111485	0.196841	0	0	8.97217	19.6837	RPS15
Adaptive Immune System	129	0.113452	0.197397	0	0	2.75	5.98503	FBXW4;MGRN1;RBCK1
mRNA Activation Upon Binding of the Cap-Binding Complex and eIFs, and Subsequent Binding to 43S	130	0.113547	0.197397	0	0	8.7954	19.1347	RPS15
HCMV Late Events	131	0.115605	0.197929	0	0	8.62542	18.61	IRS1
TNF Signaling	132	0.115605	0.197929	0	0	8.62542	18.61	RBCK1
rRNA Modification in the Nucleus and Cytosol	133	0.117658	0.198437	0	0	8.46185	18.1082	WDR3
MAP Kinase Activation	134	0.117658	0.198437	0	0	8.46185	18.1082	RPS6KA3
Negative Regulation of the PI3K AKT Network	135	0.119706	0.198923	0	0	8.30435	17.6278	IRS1
Interleukin-17 Signaling	136	0.119706	0.198923	0	0	8.30435	17.6278	RPS6KA3
L1CAM Interactions	137	0.127854	0.209384	0	0	7.72864	15.8968	RPS6KA3
EPH-Ephrin Signaling	138	0.127854	0.209384	0	0	7.72864	15.8968	GIT1
Chaperonin-mediated Protein Folding	139	0.12988	0.211171	0	0	7.5969	15.5064	FBXW4
Glycolysis	140	0.131901	0.211416	0	0	7.46957	15.1311	ADPGK
DDX58 IFIH1-mediated Induction of Interferon-Alpha Beta	141	0.131901	0.211416	0	0	7.46957	15.1311	NLRC5
HCMV Early Events	142	0.137937	0.216485	0	0	7.1118	14.0882	IRS1
RAC2 GTPase Cycle	143	0.137937	0.216485	0	0	7.1118	14.0882	GIT1
RNA Polymerase II Transcribes snRNA Genes	144	0.137937	0.216485	0	0	7.1118	14.0882	INTS9
Protein Folding	145	0.139941	0.218114	0	0	7	13.7658	FBXW4
Glucose Metabolism	146	0.141939	0.21822	0	0	6.89164	13.4549	ADPGK
RAC3 GTPase Cycle	147	0.141939	0.21822	0	0	6.89164	13.4549	GIT1
G Alpha (Q) Signalling Events	148	0.145924	0.221334	0	0	6.68462	12.8657	RPS6KA3
MITF-M-dependent Gene Expression	149	0.145924	0.221334	0	0	6.68462	12.8657	BCL2
Nuclear Events Mediated by NFE2L2	150	0.147909	0.22285	0	0	6.58568	12.5863	BCL2
Estrogen-dependent Gene Expression	151	0.161684	0.240398	0	0	5.96696	10.8725	BCL2
Unfolded Protein Response (UPR)	152	0.161684	0.240398	0	0	5.96696	10.8725	TATDN2
Signaling by Receptor Tyrosine Kinases	153	0.163763	0.241899	0	0	2.92042	5.28401	RPS6KA3;IRS1
MITF-M-regulated Melanocyte Development	154	0.167522	0.245156	0	0	5.73579	10.2478	BCL2
SARS-CoV-1-host Interactions	155	0.169459	0.245156	0	0	5.66263	10.052	RPS15
Diseases of Signal Transduction by Growth Factor Receptors and Second Messengers	156	0.171165	0.245156	0	0	2.83625	5.00635	MECP2;IRS1
Peptide Chain Elongation	157	0.171392	0.245156	0	0	5.5913	9.86195	RPS15
Viral mRNA Translation	158	0.171392	0.245156	0	0	5.5913	9.86195	RPS15
Eukaryotic Translation Elongation	159	0.175245	0.248692	0	0	5.45387	9.49829	RPS15
Selenocysteine Synthesis	160	0.177165	0.248692	0	0	5.38764	9.32423	RPS15
Interleukin-1 Signaling	161	0.177165	0.248692	0	0	5.38764	9.32423	NLRC5
Eukaryotic Translation Termination	162	0.179081	0.249829	0	0	5.32298	9.15508	RPS15
HCMV Infection	163	0.180993	0.250947	0	0	5.25985	8.99065	IRS1
Nonsense Mediated Decay (NMD) Independent of the Exon Junction Complex (EJC)	164	0.1829	0.252045	0	0	5.19818	8.83075	RPS15
Post-translational Protein Modification	165	0.189123	0.257784	0	0	1.90732	3.17637	FBXW4;USP10;TTLL1;SAE1
Formation of a Pool of Free 40S Subunits	166	0.190486	0.257784	0	0	4.96522	8.2332	RPS15
KEAP1-NFE2L2 Pathway	167	0.190486	0.257784	0	0	4.96522	8.2332	BCL2
Response of EIF2AK4 (GCN2) to Amino Acid Deficiency	168	0.194254	0.259772	0	0	4.85633	7.95752	RPS15
Selenoamino Acid Metabolism	169	0.194254	0.259772	0	0	4.85633	7.95752	RPS15
CDC42 GTPase Cycle	170	0.205457	0.273138	0	0	4.55634	7.21049	GIT1
Interleukin-1 Family Signaling	171	0.209159	0.274825	0	0	4.46435	6.9852	NLRC5
L13a-mediated Translational Silencing of Ceruloplasmin Expression	172	0.209159	0.274825	0	0	4.46435	6.9852	RPS15
GTP Hydrolysis and Joining of the 60S Ribosomal Subunit	173	0.211003	0.275645	0	0	4.41972	6.87656	RPS15
Metabolism of Proteins	174	0.214029	0.277243	0	0	1.6941	2.6117	RPS15;FBXW4;USP10;TTLL1;SAE1
SRP-dependent Cotranslational Protein Targeting to Membrane	175	0.214679	0.277243	0	0	4.33305	6.66688	RPS15
Signal Transduction	176	0.21662	0.27816	0	0	1.68571	2.57848	RPS6KA3;IRS1;BCL2;RBCK1;GIT1
Nonsense Mediated Decay (NMD) Enhanced by the Exon Junction Complex (EJC)	177	0.220163	0.279533	0	0	4.20919	6.37013	RPS15
Nonsense-Mediated Decay (NMD)	178	0.220163	0.279533	0	0	4.20919	6.37013	RPS15
Eukaryotic Translation Initiation	179	0.223798	0.280991	0	0	4.13043	6.1833	RPS15
Cap-dependent Translation Initiation	180	0.223798	0.280991	0	0	4.13043	6.1833	RPS15
Cellular Senescence	181	0.227418	0.283958	0	0	4.05455	6.00465	RPS6KA3
SARS-CoV-1 Infection	182	0.241733	0.300174	0	0	3.77671	5.36263	RPS15
Death Receptor Signaling	183	0.245272	0.302904	0	0	3.71304	5.21826	RBCK1
ESR-mediated Signaling	184	0.248795	0.305586	0	0	3.65146	5.07964	BCL2
Transcriptional Regulation by RUNX1	185	0.250551	0.306079	0	0	3.62142	5.01238	PRMT6
RAC1 GTPase Cycle	186	0.252303	0.306561	0	0	3.59187	4.94645	GIT1
Influenza Viral RNA Transcription and Replication	187	0.254051	0.307034	0	0	3.56278	4.8818	RPS15
Ub-specific Processing Proteases	188	0.266176	0.319978	0	0	3.37154	4.46256	USP10
Protein Localization	189	0.269606	0.322385	0	0	3.32057	4.35259	PEX6
Regulation of Expression of SLITs and ROBOs	190	0.27302	0.32475	0	0	3.2711	4.24658	RPS15
Cellular Response to Starvation	191	0.274721	0.325063	0	0	3.24691	4.195	RPS15
Influenza Infection	192	0.281489	0.331335	0	0	3.15356	3.99766	RPS15
SUMOylation	193	0.289863	0.339425	0	0	3.04407	3.76962	SAE1
SARS-CoV-2-host Interactions	194	0.293186	0.339795	0	0	3.00235	3.68373	RPS15
Cellular Response to Chemical Stress	195	0.293186	0.339795	0	0	3.00235	3.68373	BCL2
RAF MAP Kinase Cascade	196	0.299788	0.345674	0	0	2.9222	3.52031	IRS1
MAPK1 MAPK3 Signaling	197	0.307958	0.353292	0	0	2.82775	3.3305	IRS1
Signaling by Nuclear Receptors	198	0.314428	0.358892	0	0	2.75641	3.18917	BCL2
Signaling by ROBO Receptors	199	0.324024	0.367987	0	0	2.65582	2.99294	RPS15
PIP3 Activates AKT Signaling	200	0.348988	0.388529	0	0	2.41981	2.54738	IRS1
Chromatin Modifying Enzymes	201	0.348988	0.388529	0	0	2.41981	2.54738	PRMT6
Chromatin Organization	202	0.348988	0.388529	0	0	2.41981	2.54738	PRMT6
Metabolism of Carbohydrates	203	0.348988	0.388529	0	0	2.41981	2.54738	ADPGK
MAPK Family Signaling Cascades	204	0.35509	0.393137	0	0	2.36712	2.45088	IRS1
Neddylation	205	0.356607	0.393137	0	0	2.3543	2.42757	FBXW4
GPCR Downstream Signalling	206	0.365636	0.399197	0	0	2.28014	2.29409	RPS6KA3
Deubiquitination	207	0.365636	0.399197	0	0	2.28014	2.29409	USP10
RNA Polymerase II Transcription	208	0.36762	0.399433	0	0	1.44806	1.44908	PRMT6;MECP2;INTS9
Signaling by GPCR	209	0.386235	0.415663	0	0	2.12375	2.02034	RPS6KA3
Intracellular Signaling by Second Messengers	210	0.386235	0.415663	0	0	2.12375	2.02034	IRS1
SARS-CoV-2 Infection	211	0.399137	0.427512	0	0	2.03386	1.868	RPS15
Viral Infection Pathways	212	0.418866	0.446527	0	0	1.4492	1.2611	RPS15;IRS1
Metabolism of Amino Acids and Derivatives	213	0.421435	0.447157	0	0	1.89121	1.63418	RPS15
Translation	214	0.452104	0.477455	0	0	1.71739	1.36334	RPS15
DNA Repair	215	0.454696	0.477959	0	0	1.70374	1.34276	USP10
Metabolism of RNA	216	0.459323	0.480588	0	0	1.33288	1.03698	RPS15;WDR3
Gene Expression (Transcription)	217	0.481791	0.501773	0	0	1.19271	0.87097	PRMT6;MECP2;INTS9
Neutrophil Degranulation	218	0.513491	0.532334	0	0	1.42967	0.952907	DBNL
Infectious Disease	219	0.516398	0.532904	0	0	1.18972	0.786262	RPS15;IRS1
RHO GTPase Cycle	220	0.520398	0.533339	0	0	1.40134	0.915301	GIT1
SARS-CoV Infections	221	0.52154	0.533339	0	0	1.39672	0.909224	RPS15
Disease	222	0.540018	0.549748	0	0	1.08631	0.669331	RPS15;MECP2;IRS1
Generic Transcription Pathway	223	0.575918	0.583666	0	0	1.05994	0.584864	PRMT6;MECP2
Signaling by Rho GTPases	224	0.671902	0.677901	0	0	0.915634	0.364096	GIT1
Signaling by Rho GTPases, Miro GTPases and RHOBTB3	225	0.682847	0.685882	0	0	0.887891	0.338716	GIT1
Metabolism	226	0.84421	0.84421	0	0	0.598086	0.101288	RPS15;ADPGK
