# Supplementary material
Source: HighWire-hosted journal article supplement (doi:10.1101/rna.080633.125)
Supplement: Supplemental_Table_S5.xlsx [file Supplemental_Table_S5.xlsx]

## Sheet: Uniquely Expressed Naïve psi
Term	Rank	P.value	Adjusted.P.value	Old.P.value	Old.Adjusted.P.value	Odds.Ratio	Combined.Score	Genes
Positive Regulation Of Leukocyte Cell-Cell Adhesion (GO:1903039)	1	0.000795068	0.29562	0	0	19.56	139.601	PYCARD;SKAP1;HSPD1
Positive Regulation Of Adaptive Immune Response (GO:0002821)	2	0.00287643	0.29562	0	0	32.3208	189.115	PYCARD;SKAP1
Positive Regulation Of Type II Interferon Production (GO:0032729)	3	0.00296007	0.29562	0	0	11.7246	68.2668	PYCARD;TXK;HSPD1
Potassium Ion Homeostasis (GO:0055075)	4	0.00456049	0.29562	0	0	24.2358	130.639	ATP1A1;SLC12A9
Apoptotic Process (GO:0006915)	5	0.00499156	0.29562	0	0	4.08461	21.6485	PYCARD;MAGEH1;ADORA2A;TNFSF12;RAF1;HSPD1
Mitochondrial Calcium Ion Transmembrane Transport (GO:0006851)	6	0.00553627	0.29562	0	0	21.5409	111.936	MCUB;PMPCB
Potassium Ion Import Across Plasma Membrane (GO:1990573)	7	0.00659866	0.29562	0	0	19.3849	97.3295	ATP1A1;SLC12A9
Diacylglycerol Metabolic Process (GO:0046339)	8	0.0077458	0.29562	0	0	17.6209	85.6484	DGKA;PNPLA2
Regulation Of Adaptive Immune Response (GO:0002819)	9	0.0077458	0.29562	0	0	17.6209	85.6484	PYCARD;SKAP1
Regulation Of Type II Interferon Production (GO:0032649)	10	0.00873691	0.29562	0	0	7.70376	36.5174	PYCARD;TXK;HSPD1
Regulation Of Chemokine Production (GO:0032642)	11	0.00897585	0.29562	0	0	16.1509	76.1229	PYCARD;SIGIRR
Heterophilic Cell-Cell Adhesion Via Plasma Membrane Cell Adhesion Molecules (GO:0007157)	12	0.00897585	0.29562	0	0	16.1509	76.1229	JAML;AMIGO2
Negative Regulation Of Hemostasis (GO:1900047)	13	0.0103925	0.29562	0	0	Inf	Inf	SERPINE2
Negative Regulation Of Plasminogen Activation (GO:0010757)	14	0.0103925	0.29562	0	0	Inf	Inf	SERPINE2
Positive Regulation Of Epithelial Cell Proliferation Involved In Wound Healing (GO:0060054)	15	0.0103925	0.29562	0	0	Inf	Inf	JAML
Negative Regulation Of Coagulation (GO:0050819)	16	0.0103925	0.29562	0	0	Inf	Inf	SERPINE2
Positive Regulation Of Vasculature Development (GO:1904018)	17	0.0106141	0.29562	0	0	7.13798	32.4462	BTG1;PDCD6;TNFSF12
Positive Regulation Of Interleukin-10 Production (GO:0032733)	18	0.0116774	0.29562	0	0	13.841	61.5937	PYCARD;HSPD1
Positive Regulation Of Lamellipodium Assembly (GO:0010592)	19	0.0116774	0.29562	0	0	13.841	61.5937	TWF2;WASF2
Negative Regulation Of Cytoskeleton Organization (GO:0051494)	20	0.0116774	0.29562	0	0	13.841	61.5937	TWF2;FKBP4
SMAD Protein Signal Transduction (GO:0060395)	21	0.0131454	0.29562	0	0	12.917	55.9523	SMAD2;JUN
Intrinsic Apoptotic Signaling Pathway In Response To DNA Damage By P53 Class Mediator (GO:0042771)	22	0.0131454	0.29562	0	0	12.917	55.9523	PYCARD;CDIP1
Positive Regulation Of Angiogenesis (GO:0045766)	23	0.0142249	0.29562	0	0	6.35901	27.0433	BTG1;PDCD6;TNFSF12
Positive Regulation Of Epithelial Cell Proliferation (GO:0050679)	24	0.0142249	0.29562	0	0	6.35901	27.0433	JAML;PDCD6;TNFSF12
Positive Regulation Of Extrinsic Apoptotic Signaling Pathway (GO:2001238)	25	0.0146892	0.29562	0	0	12.1085	51.1056	PYCARD;TNFSF12
Negative Regulation Of Protein Serine/Threonine Kinase Activity (GO:0071901)	26	0.0150206	0.29562	0	0	6.2231	26.1267	PYCARD;PRKAR1B;RGS14
Acylglycerol Metabolic Process (GO:0006639)	27	0.0163071	0.29562	0	0	11.3951	46.9041	DGKA;PNPLA2
Organelle Membrane Fusion (GO:0090174)	28	0.0163071	0.29562	0	0	11.3951	46.9041	VAMP8;STX10
Positive Regulation Of Lymphocyte Activation (GO:0051251)	29	0.0163071	0.29562	0	0	11.3951	46.9041	PYCARD;HSPD1
Regulation Of Cysteine-Type Endopeptidase Activity Involved In Apoptotic Process (GO:0043281)	30	0.0175563	0.29562	0	0	5.848	23.6396	PYCARD;PDCD6;RAF1
Regulation Of Interleukin-10 Production (GO:0032653)	31	0.0197586	0.29562	0	0	10.1936	40.0016	PYCARD;HSPD1
Positive Regulation Of Lamellipodium Organization (GO:1902745)	32	0.0197586	0.29562	0	0	10.1936	40.0016	TWF2;WASF2
Regulation Of Cell Motility (GO:2000145)	33	0.0203164	0.29562	0	0	5.51536	21.4897	SERPINE2;PKN1;RAF1
Regulation Of Microvillus Organization (GO:0032530)	34	0.0206781	0.29562	0	0	96.1028	372.752	TWF2
Nucleoside Triphosphate Biosynthetic Process (GO:0009142)	35	0.0206781	0.29562	0	0	96.1028	372.752	AK5
Osmosensory Signaling Pathway (GO:0007231)	36	0.0206781	0.29562	0	0	96.1028	372.752	PYCARD
Positive Regulation Of T Cell Mediated Immune Response To Tumor Cell (GO:0002842)	37	0.0206781	0.29562	0	0	96.1028	372.752	HSPD1
Positive Regulation Of Activin Receptor Signaling Pathway (GO:0032927)	38	0.0206781	0.29562	0	0	96.1028	372.752	SMAD2
Positive Regulation Of Immune Response To Tumor Cell (GO:0002839)	39	0.0206781	0.29562	0	0	96.1028	372.752	HSPD1
Innate Immune Response In Mucosa (GO:0002227)	40	0.0206781	0.29562	0	0	96.1028	372.752	FAU
Mucosal Immune Response (GO:0002385)	41	0.0206781	0.29562	0	0	96.1028	372.752	FAU
Regulation Of Cardiac Muscle Cell Apoptotic Process (GO:0010665)	42	0.0206781	0.29562	0	0	96.1028	372.752	CAMK2D
Regulation Of Lamellipodium Assembly (GO:0010591)	43	0.0215888	0.29562	0	0	9.68302	37.14	TWF2;WASF2
Epithelial Cell Migration (GO:0010631)	44	0.0215888	0.29562	0	0	9.68302	37.14	TNFSF12;PKN1
Response To Organonitrogen Compound (GO:0010243)	45	0.0234867	0.29562	0	0	9.22102	34.591	ADORA2A;SYVN1
Inorganic Cation Import Across Plasma Membrane (GO:0098659)	46	0.0254505	0.29562	0	0	8.80103	32.3088	ATP1A1;SLC12A9
Negative Regulation Of Lipopolysaccharide-Mediated Signaling Pathway (GO:0031665)	47	0.0308577	0.29562	0	0	48.0467	167.124	SIGIRR
Regulation Of Histone Deacetylase Activity (GO:1901725)	48	0.0308577	0.29562	0	0	48.0467	167.124	CAMK2D
Negative Regulation Of Secretion (GO:0051048)	49	0.0308577	0.29562	0	0	48.0467	167.124	VAMP8
Negative Regulation Of Sequestering Of Triglyceride (GO:0010891)	50	0.0308577	0.29562	0	0	48.0467	167.124	PNPLA2
Regulation Of Protein Kinase A Signaling (GO:0010738)	51	0.0308577	0.29562	0	0	48.0467	167.124	AKAP7
Cardiac Muscle Cell Contraction (GO:0086003)	52	0.0308577	0.29562	0	0	48.0467	167.124	CAMK2D
Cobalamin Transport (GO:0015889)	53	0.0308577	0.29562	0	0	48.0467	167.124	CD320
Positive Regulation Of Fibroblast Apoptotic Process (GO:2000271)	54	0.0308577	0.29562	0	0	48.0467	167.124	BTG1
Vascular Endothelial Growth Factor Receptor-2 Signaling Pathway (GO:0036324)	55	0.0308577	0.29562	0	0	48.0467	167.124	PDCD6
Visual Learning (GO:0008542)	56	0.0308577	0.29562	0	0	48.0467	167.124	RGS14
Positive Regulation Of Triglyceride Catabolic Process (GO:0010898)	57	0.0308577	0.29562	0	0	48.0467	167.124	PNPLA2
Purine-Containing Compound Catabolic Process (GO:0072523)	58	0.0308577	0.29562	0	0	48.0467	167.124	NUDT1
Regulation Of Calcium Ion Transmembrane Transport Via High Voltage-Gated Calcium Channel (GO:1902514)	59	0.0308577	0.29562	0	0	48.0467	167.124	CAMK2D
Regulation Of Cardiac Muscle Cell Action Potential Involved In Regulation Of Contraction (GO:0098909)	60	0.0308577	0.29562	0	0	48.0467	167.124	CAMK2D
T Cell Receptor Signaling Pathway (GO:0050852)	61	0.0323642	0.29562	0	0	4.5625	15.6526	THEMIS2;TXK;SKAP1
Regulation Of Receptor Signaling Pathway Via JAK-STAT (GO:0046425)	62	0.033935	0.29562	0	0	7.44412	25.1858	SOCS3;IL10RA
Potassium Ion Transmembrane Transport (GO:0071805)	63	0.0362059	0.29562	0	0	7.16771	23.7863	ATP1A1;SLC12A9
Intrinsic Apoptotic Signaling Pathway By P53 Class Mediator (GO:0072332)	64	0.0385339	0.29562	0	0	6.91105	22.5039	PYCARD;CDIP1
Regulation Of Endothelial Cell Differentiation (GO:0045601)	65	0.0409325	0.29562	0	0	32.028	102.356	BTG1
Regulation Of Fibroblast Apoptotic Process (GO:2000269)	66	0.0409325	0.29562	0	0	32.028	102.356	BTG1
Negative Regulation Of Platelet Aggregation (GO:0090331)	67	0.0409325	0.29562	0	0	32.028	102.356	SERPINE2
Negative Regulation Of Transcription From RNA Polymerase II Promoter In Response To Stress (GO:0097201)	68	0.0409325	0.29562	0	0	32.028	102.356	JUN
Anterograde Axonal Protein Transport (GO:0099641)	69	0.0409325	0.29562	0	0	32.028	102.356	MAPK8IP3
Neutrophil Degranulation (GO:0043312)	70	0.0409325	0.29562	0	0	32.028	102.356	VAMP8
Neutrophil Extravasation (GO:0072672)	71	0.0409325	0.29562	0	0	32.028	102.356	JAML
Axo-Dendritic Protein Transport (GO:0099640)	72	0.0409325	0.29562	0	0	32.028	102.356	MAPK8IP3
Nucleoside Phosphate Biosynthetic Process (GO:1901293)	73	0.0409325	0.29562	0	0	32.028	102.356	AK5
Nucleoside Triphosphate Metabolic Process (GO:0009141)	74	0.0409325	0.29562	0	0	32.028	102.356	AK5
Cardiac Muscle Cell Action Potential (GO:0086001)	75	0.0409325	0.29562	0	0	32.028	102.356	ATP1A1
Regulation Of Triglyceride Catabolic Process (GO:0010896)	76	0.0409325	0.29562	0	0	32.028	102.356	PNPLA2
Central Nervous System Projection Neuron Axonogenesis (GO:0021952)	77	0.0409325	0.29562	0	0	32.028	102.356	SZT2
Positive Regulation Of Astrocyte Differentiation (GO:0048711)	78	0.0409325	0.29562	0	0	32.028	102.356	SERPINE2
Positive Regulation Of Calcium Ion Import Across Plasma Membrane (GO:1905665)	79	0.0409325	0.29562	0	0	32.028	102.356	PPP3CC
Positive Regulation Of Cell-Cell Adhesion Mediated By Integrin (GO:0033634)	80	0.0409325	0.29562	0	0	32.028	102.356	SKAP1
Diacylglycerol Biosynthetic Process (GO:0006651)	81	0.0409325	0.29562	0	0	32.028	102.356	PNPLA2
Secondary Palate Development (GO:0062009)	82	0.0409325	0.29562	0	0	32.028	102.356	SMAD2
Sequestering Of Actin Monomers (GO:0042989)	83	0.0409325	0.29562	0	0	32.028	102.356	TWF2
Positive Regulation Of Heterotypic Cell-Cell Adhesion (GO:0034116)	84	0.0409325	0.29562	0	0	32.028	102.356	SKAP1
Positive Regulation Of Macrophage Activation (GO:0043032)	85	0.0409325	0.29562	0	0	32.028	102.356	HSPD1
Positive Regulation Of Mast Cell Degranulation (GO:0043306)	86	0.0409325	0.29562	0	0	32.028	102.356	VAMP8
Lipid Droplet Disassembly (GO:1905691)	87	0.0409325	0.29562	0	0	32.028	102.356	PNPLA2
Maintenance Of Gastrointestinal Epithelium (GO:0030277)	88	0.0409325	0.29562	0	0	32.028	102.356	IL10RA
Protein Localization To Presynapse (GO:1905383)	89	0.0409325	0.29562	0	0	32.028	102.356	MAPK8IP3
Mesoderm Morphogenesis (GO:0048332)	90	0.0409325	0.29562	0	0	32.028	102.356	SMAD2
Regulation Of DNA-templated Transcription In Response To Stress (GO:0043620)	91	0.0409325	0.29562	0	0	32.028	102.356	RGS14
Regulation Of T Cell Mediated Immune Response To Tumor Cell (GO:0002840)	92	0.0409325	0.29562	0	0	32.028	102.356	HSPD1
Negative Regulation Of T Cell Apoptotic Process (GO:0070233)	93	0.0409325	0.29562	0	0	32.028	102.356	TSC22D3
Regulation Of Cytokine-Mediated Signaling Pathway (GO:0001959)	94	0.0433555	0.29562	0	0	6.44906	20.2392	PYCARD;SIGIRR
Calcium Ion Transmembrane Transport (GO:0070588)	95	0.0433555	0.29562	0	0	6.44906	20.2392	MCUB;PMPCB
Positive Regulation Of Interleukin-6 Production (GO:0032755)	96	0.0433555	0.29562	0	0	6.44906	20.2392	PYCARD;HSPD1
Regulation Of T Cell Activation (GO:0050863)	97	0.0433555	0.29562	0	0	6.44906	20.2392	PYCARD;HSPD1
Positive Regulation Of Cysteine-Type Endopeptidase Activity Involved In Apoptotic Process (GO:0043280)	98	0.0444476	0.29562	0	0	3.99648	12.4428	PYCARD;PDCD6;HSPD1
Negative Regulation Of Signal Transduction (GO:0009968)	99	0.0474328	0.29562	0	0	3.07601	9.37705	SIGIRR;RGS14;PDCD6;TRABD2A
Adenylate Cyclase-Modulating G Protein-Coupled Receptor Signaling Pathway (GO:0007188)	100	0.0483887	0.29562	0	0	6.04481	18.3066	ADORA2A;WASF2
Cellular Response To Glucose Starvation (GO:0042149)	101	0.0483887	0.29562	0	0	6.04481	18.3066	SZT2;HNRNPA1
Negative Regulation Of Homotypic Cell-Cell Adhesion (GO:0034111)	102	0.0509035	0.29562	0	0	24.0187	71.5234	SERPINE2
Regulation Of Histamine Secretion By Mast Cell (GO:1903593)	103	0.0509035	0.29562	0	0	24.0187	71.5234	VAMP8
SMAD Protein Complex Assembly (GO:0007183)	104	0.0509035	0.29562	0	0	24.0187	71.5234	SMAD2
Negative Regulation Of Platelet Activation (GO:0010544)	105	0.0509035	0.29562	0	0	24.0187	71.5234	SERPINE2
T-helper 17 Cell Lineage Commitment (GO:0072540)	106	0.0509035	0.29562	0	0	24.0187	71.5234	SOCS3
Negative Regulation Of Protein Maturation (GO:1903318)	107	0.0509035	0.29562	0	0	24.0187	71.5234	SERPINE2
Actin-Mediated Cell Contraction (GO:0070252)	108	0.0509035	0.29562	0	0	24.0187	71.5234	CAMK2D
Activation Of Adenylate Cyclase Activity (GO:0007190)	109	0.0509035	0.29562	0	0	24.0187	71.5234	RAF1
Negative Regulation Of Response To Cytokine Stimulus (GO:0060761)	110	0.0509035	0.29562	0	0	24.0187	71.5234	SIGIRR
Acute-Phase Response (GO:0006953)	111	0.0509035	0.29562	0	0	24.0187	71.5234	SIGIRR
Negative Regulation Of Sodium Ion Transmembrane Transporter Activity (GO:2000650)	112	0.0509035	0.29562	0	0	24.0187	71.5234	CAMK2D
Neuron Projection Regeneration (GO:0031102)	113	0.0509035	0.29562	0	0	24.0187	71.5234	MAPK8IP3
Nucleobase-Containing Small Molecule Interconversion (GO:0015949)	114	0.0509035	0.29562	0	0	24.0187	71.5234	AK5
Nucleotide Catabolic Process (GO:0009166)	115	0.0509035	0.29562	0	0	24.0187	71.5234	SAMHD1
Chloride Ion Homeostasis (GO:0055064)	116	0.0509035	0.29562	0	0	24.0187	71.5234	SLC12A9
Embryonic Axis Specification (GO:0000578)	117	0.0509035	0.29562	0	0	24.0187	71.5234	SMAD2
Positive Regulation Of Gluconeogenesis (GO:0045722)	118	0.0509035	0.29562	0	0	24.0187	71.5234	DDB1
Positive Regulation Of Hormone Secretion (GO:0046887)	119	0.0509035	0.29562	0	0	24.0187	71.5234	VAMP8
Positive Regulation Of Integrin Activation (GO:0033625)	120	0.0509035	0.29562	0	0	24.0187	71.5234	SKAP1
Positive Regulation Of Leukocyte Activation (GO:0002696)	121	0.0509035	0.29562	0	0	24.0187	71.5234	HSPD1
tRNA Pseudouridine Synthesis (GO:0031119)	122	0.0509035	0.29562	0	0	24.0187	71.5234	RPUSD4
Gamma-Delta T Cell Activation (GO:0046629)	123	0.0509035	0.29562	0	0	24.0187	71.5234	JAML
Innate Immune Response-Activating Signaling Pathway (GO:0002758)	124	0.0509035	0.29562	0	0	24.0187	71.5234	PYCARD
Intracellular Potassium Ion Homeostasis (GO:0030007)	125	0.0509035	0.29562	0	0	24.0187	71.5234	ATP1A1
Macropinocytosis (GO:0044351)	126	0.0509035	0.29562	0	0	24.0187	71.5234	PYCARD
Purine Deoxyribonucleotide Catabolic Process (GO:0009155)	127	0.0509035	0.29562	0	0	24.0187	71.5234	SAMHD1
Monoatomic Anion Homeostasis (GO:0055081)	128	0.0509035	0.29562	0	0	24.0187	71.5234	SLC12A9
Regulation Of DNA-templated Transcription Initiation (GO:2000142)	129	0.0509035	0.29562	0	0	24.0187	71.5234	JUN
Regulation Of Astrocyte Differentiation (GO:0048710)	130	0.0509035	0.29562	0	0	24.0187	71.5234	SERPINE2
Negative Regulation Of Blood Coagulation (GO:0030195)	131	0.0509035	0.29562	0	0	24.0187	71.5234	SERPINE2
Regulation Of Cell Activation (GO:0050865)	132	0.0509035	0.29562	0	0	24.0187	71.5234	TXK
Negative Regulation Of Cytokine-Mediated Signaling Pathway (GO:0001960)	133	0.0509813	0.29562	0	0	5.86106	17.4443	SIGIRR;SAMHD1
Phosphatidylinositol Phosphate Biosynthetic Process (GO:0046854)	134	0.0536228	0.29562	0	0	5.68812	16.6422	SOCS3;CISH
Positive Regulation Of Endothelial Cell Proliferation (GO:0001938)	135	0.0536228	0.29562	0	0	5.68812	16.6422	PDCD6;TNFSF12
Antigen Receptor-Mediated Signaling Pathway (GO:0050851)	136	0.0551849	0.29562	0	0	3.64429	10.5577	THEMIS2;TXK;SKAP1
Regulation Of Epithelial To Mesenchymal Transition (GO:0010717)	137	0.056312	0.29562	0	0	5.52507	15.8948	SMAD2;MCRIP1
Regulation Of Angiogenesis (GO:0045765)	138	0.0584607	0.29562	0	0	3.5547	10.0932	BTG1;PDCD6;TNFSF12
Regulation Of Actin Filament Polymerization (GO:0030833)	139	0.0590477	0.29562	0	0	5.37107	15.197	PYCARD;TWF2
DNA Strand Resection Involved In Replication Fork Processing (GO:0110025)	140	0.0607718	0.29562	0	0	19.2131	53.8087	SAMHD1
MyD88-dependent Toll-Like Receptor Signaling Pathway (GO:0002755)	141	0.0607718	0.29562	0	0	19.2131	53.8087	HSPD1
Regulation Of Heart Rate By Cardiac Conduction (GO:0086091)	142	0.0607718	0.29562	0	0	19.2131	53.8087	CAMK2D
T-helper 17 Cell Differentiation (GO:0072539)	143	0.0607718	0.29562	0	0	19.2131	53.8087	SOCS3
Negative Regulation Of Protein Processing (GO:0010955)	144	0.0607718	0.29562	0	0	19.2131	53.8087	SERPINE2
Activin Receptor Signaling Pathway (GO:0032924)	145	0.0607718	0.29562	0	0	19.2131	53.8087	SMAD2
Antibacterial Humoral Response (GO:0019731)	146	0.0607718	0.29562	0	0	19.2131	53.8087	FAU
Negative Regulation Of Vascular Endothelial Growth Factor Receptor Signaling Pathway (GO:0030948)	147	0.0607718	0.29562	0	0	19.2131	53.8087	PDCD6
Negative Regulation Of Wound Healing (GO:0061045)	148	0.0607718	0.29562	0	0	19.2131	53.8087	SERPINE2
Autophagosome Membrane Docking (GO:0016240)	149	0.0607718	0.29562	0	0	19.2131	53.8087	VAMP8
Axon Regeneration (GO:0031103)	150	0.0607718	0.29562	0	0	19.2131	53.8087	MAPK8IP3
Platelet-Derived Growth Factor Receptor Signaling Pathway (GO:0048008)	151	0.0607718	0.29562	0	0	19.2131	53.8087	RGS14
Relaxation Of Cardiac Muscle (GO:0055119)	152	0.0607718	0.29562	0	0	19.2131	53.8087	CAMK2D
Relaxation Of Muscle (GO:0090075)	153	0.0607718	0.29562	0	0	19.2131	53.8087	CAMK2D
Renal Absorption (GO:0070293)	154	0.0607718	0.29562	0	0	19.2131	53.8087	MAGED2
Sodium Ion Export Across Plasma Membrane (GO:0036376)	155	0.0607718	0.29562	0	0	19.2131	53.8087	ATP1A1
Establishment Of Mitotic Sister Chromatid Cohesion (GO:0034087)	156	0.0607718	0.29562	0	0	19.2131	53.8087	RAD21
Triglyceride Catabolic Process (GO:0019433)	157	0.0607718	0.29562	0	0	19.2131	53.8087	PNPLA2
Icosanoid Biosynthetic Process (GO:0046456)	158	0.0607718	0.29562	0	0	19.2131	53.8087	PYCARD
Intracellular Sodium Ion Homeostasis (GO:0006883)	159	0.0607718	0.29562	0	0	19.2131	53.8087	ATP1A1
Positive Regulation Of Voltage-Gated Calcium Channel Activity (GO:1901387)	160	0.0607718	0.29562	0	0	19.2131	53.8087	PPP3CC
Negative Regulation Of cAMP-dependent Protein Kinase Activity (GO:2000480)	161	0.0607718	0.29562	0	0	19.2131	53.8087	PRKAR1B
Regulation Of Calcium Ion Import Across Plasma Membrane (GO:1905664)	162	0.0607718	0.29562	0	0	19.2131	53.8087	PPP3CC
Regulation Of Cell Communication By Electrical Coupling Involved In Cardiac Conduction (GO:1901844)	163	0.0607718	0.29562	0	0	19.2131	53.8087	CAMK2D
Negative Regulation Of TOR Signaling (GO:0032007)	164	0.0618284	0.29562	0	0	5.2254	14.5443	SZT2;PDCD6
Regulation Of Endothelial Cell Proliferation (GO:0001936)	165	0.0646532	0.29562	0	0	5.08739	13.9329	PDCD6;TNFSF12
Wound Healing (GO:0042060)	166	0.0646532	0.29562	0	0	5.08739	13.9329	JAML;RAF1
Intrinsic Apoptotic Signaling Pathway In Response To DNA Damage (GO:0008630)	167	0.0646532	0.29562	0	0	5.08739	13.9329	PYCARD;CDIP1
Cell-Cell Adhesion Via Plasma-Membrane Adhesion Molecules (GO:0098742)	168	0.0675207	0.29562	0	0	4.95646	13.3592	JAML;AMIGO2
Positive Regulation Of Immune Response (GO:0050778)	169	0.0675207	0.29562	0	0	4.95646	13.3592	PYCARD;SKAP1
Regulation Of Extrinsic Apoptotic Signaling Pathway (GO:2001236)	170	0.0704298	0.29562	0	0	4.83208	12.8202	PYCARD;TNFSF12
Regulation Of Actin Filament-Based Process (GO:0032970)	171	0.0704298	0.29562	0	0	4.83208	12.8202	CNN2;TWF2
SNARE Complex Assembly (GO:0035493)	172	0.0705385	0.29562	0	0	16.0093	42.4503	VAMP8
T-helper Cell Lineage Commitment (GO:0002295)	173	0.0705385	0.29562	0	0	16.0093	42.4503	SOCS3
Neutrophil Activation Involved In Immune Response (GO:0002283)	174	0.0705385	0.29562	0	0	16.0093	42.4503	VAMP8
Calcium Import Into The Mitochondrion (GO:0036444)	175	0.0705385	0.29562	0	0	16.0093	42.4503	MCUB
Cardiac Muscle Cell Action Potential Involved In Contraction (GO:0086002)	176	0.0705385	0.29562	0	0	16.0093	42.4503	ATP1A1
Regulation Of Sequestering Of Triglyceride (GO:0010889)	177	0.0705385	0.29562	0	0	16.0093	42.4503	PNPLA2
Phosphatidylglycerol Biosynthetic Process (GO:0006655)	178	0.0705385	0.29562	0	0	16.0093	42.4503	CRLS1
Pinocytosis (GO:0006907)	179	0.0705385	0.29562	0	0	16.0093	42.4503	PYCARD
Positive Regulation Of Arp2/3 Complex-Mediated Actin Nucleation (GO:2000601)	180	0.0705385	0.29562	0	0	16.0093	42.4503	WASF2
Positive Regulation Of Epithelial Cell Differentiation (GO:0030858)	181	0.0705385	0.29562	0	0	16.0093	42.4503	BTG1
Sodium Ion Homeostasis (GO:0055078)	182	0.0705385	0.29562	0	0	16.0093	42.4503	ATP1A1
Somatic Hypermutation Of Immunoglobulin Genes (GO:0016446)	183	0.0705385	0.29562	0	0	16.0093	42.4503	SAMHD1
Positive Regulation Of Lymphocyte Migration (GO:2000403)	184	0.0705385	0.29562	0	0	16.0093	42.4503	PYCARD
Meiotic Sister Chromatid Cohesion (GO:0051177)	185	0.0705385	0.29562	0	0	16.0093	42.4503	RAD21
Mitochondrial tRNA Modification (GO:0070900)	186	0.0705385	0.29562	0	0	16.0093	42.4503	RPUSD4
Myeloid Dendritic Cell Activation (GO:0001773)	187	0.0705385	0.29562	0	0	16.0093	42.4503	PYCARD
Regulation Of Cell Communication By Electrical Coupling (GO:0010649)	188	0.0705385	0.29562	0	0	16.0093	42.4503	CAMK2D
Negative Regulation Of Chemokine Production (GO:0032682)	189	0.0705385	0.29562	0	0	16.0093	42.4503	SIGIRR
Regulation Of Cell-Cell Adhesion Mediated By Integrin (GO:0033632)	190	0.0705385	0.29562	0	0	16.0093	42.4503	SKAP1
Positive Regulation Of Apoptotic Signaling Pathway (GO:2001235)	191	0.0733793	0.29562	0	0	4.71376	12.3129	PYCARD;TNFSF12
Positive Regulation Of Cysteine-Type Endopeptidase Activity (GO:2001056)	192	0.0733793	0.29562	0	0	4.71376	12.3129	PYCARD;PDCD6
Transforming Growth Factor Beta Receptor Signaling Pathway (GO:0007179)	193	0.0733793	0.29562	0	0	4.71376	12.3129	SMAD2;JUN
Positive Regulation Of JNK Cascade (GO:0046330)	194	0.0763681	0.29562	0	0	4.60108	11.8348	PYCARD;MAPK8IP3
Post-Translational Protein Modification (GO:0043687)	195	0.0763681	0.29562	0	0	4.60108	11.8348	PKN1;UCHL3
Response To Calcium Ion (GO:0051592)	196	0.0793951	0.29562	0	0	4.49364	11.3838	CAMK2D;PDCD6
Positive Regulation Of Inflammatory Response (GO:0050729)	197	0.0793951	0.29562	0	0	4.49364	11.3838	PYCARD;VAMP8
B Cell Proliferation (GO:0042100)	198	0.0802045	0.29562	0	0	13.721	34.6204	HSPD1
Regulation Of Cysteine-Type Endopeptidase Activity (GO:2000116)	199	0.0802045	0.29562	0	0	13.721	34.6204	PYCARD
Negative Regulation Of Interferon-Beta Production (GO:0032688)	200	0.0802045	0.29562	0	0	13.721	34.6204	PYCARD
Actin Filament Depolymerization (GO:0030042)	201	0.0802045	0.29562	0	0	13.721	34.6204	TWF2
Regulation Of Leukocyte Cell-Cell Adhesion (GO:1903037)	202	0.0802045	0.29562	0	0	13.721	34.6204	SKAP1
Regulation Of Membrane Depolarization (GO:0003254)	203	0.0802045	0.29562	0	0	13.721	34.6204	CAMK2D
Negative Regulation Of Voltage-Gated Calcium Channel Activity (GO:1901386)	204	0.0802045	0.29562	0	0	13.721	34.6204	PPP3CC
Neutrophil Mediated Immunity (GO:0002446)	205	0.0802045	0.29562	0	0	13.721	34.6204	VAMP8
calcineurin-NFAT Signaling Cascade (GO:0033173)	206	0.0802045	0.29562	0	0	13.721	34.6204	PPP3CC
Calcineurin-Mediated Signaling (GO:0097720)	207	0.0802045	0.29562	0	0	13.721	34.6204	PPP3CC
Carboxylic Acid Biosynthetic Process (GO:0046394)	208	0.0802045	0.29562	0	0	13.721	34.6204	PYCARD
Regulation Of Sister Chromatid Cohesion (GO:0007063)	209	0.0802045	0.29562	0	0	13.721	34.6204	RAD21
Regulation Of Type II Interferon-Mediated Signaling Pathway (GO:0060334)	210	0.0802045	0.29562	0	0	13.721	34.6204	TXK
Positive Regulation Of Adenylate Cyclase Activity (GO:0045762)	211	0.0802045	0.29562	0	0	13.721	34.6204	RAF1
Positive Regulation Of Cell Adhesion Mediated By Integrin (GO:0033630)	212	0.0802045	0.29562	0	0	13.721	34.6204	SKAP1
Response To Sterol (GO:0036314)	213	0.0802045	0.29562	0	0	13.721	34.6204	SMAD2
Positive Regulation Of Glial Cell Differentiation (GO:0045687)	214	0.0802045	0.29562	0	0	13.721	34.6204	SERPINE2
Gastrulation (GO:0007369)	215	0.0802045	0.29562	0	0	13.721	34.6204	SMAD2
Long-Term Synaptic Potentiation (GO:0060291)	216	0.0802045	0.29562	0	0	13.721	34.6204	RGS14
mRNA Pseudouridine Synthesis (GO:1990481)	217	0.0802045	0.29562	0	0	13.721	34.6204	RPUSD4
Mesenchyme Morphogenesis (GO:0072132)	218	0.0802045	0.29562	0	0	13.721	34.6204	SMAD2
Mesoderm Formation (GO:0001707)	219	0.0802045	0.29562	0	0	13.721	34.6204	SMAD2
Pulmonary Valve Morphogenesis (GO:0003184)	220	0.0802045	0.29562	0	0	13.721	34.6204	SMAD2
Myeloid Cell Activation Involved In Immune Response (GO:0002275)	221	0.0802045	0.29562	0	0	13.721	34.6204	PYCARD
Negative Regulation By Host Of Viral Transcription (GO:0043922)	222	0.0802045	0.29562	0	0	13.721	34.6204	JUN
Regulation Of Cardiac Muscle Cell Contraction (GO:0086004)	223	0.0802045	0.29562	0	0	13.721	34.6204	CAMK2D
Regulation Of Cardiac Muscle Contraction By Regulation Of The Release Of Sequestered Calcium Ion (GO:0010881)	224	0.0802045	0.29562	0	0	13.721	34.6204	CAMK2D
Nucleocytoplasmic Transport (GO:0006913)	225	0.0824592	0.29562	0	0	4.39108	10.9577	RGS14;HNRNPA1
Protein-Containing Complex Assembly (GO:0065003)	226	0.0850526	0.29562	0	0	2.22065	5.47277	SMAD2;VAMP8;CDC123;PDCD6;HSPD1
Regulation Of Cellular Localization (GO:0060341)	227	0.0855593	0.29562	0	0	4.29308	10.5547	CAMK2D;STX10
Activation Of Cysteine-Type Endopeptidase Activity Involved In Apoptotic Process (GO:0006919)	228	0.0855593	0.29562	0	0	4.29308	10.5547	PYCARD;HSPD1
Cellular Response To Lipid (GO:0071396)	229	0.085803	0.29562	0	0	3.00059	7.36855	PYCARD;TWF2;ATP1A1
RNA Phosphodiester Bond Hydrolysis, Endonucleolytic (GO:0090502)	230	0.0897709	0.29562	0	0	12.0047	28.9372	POP7
Regulation Of Heterotypic Cell-Cell Adhesion (GO:0034114)	231	0.0897709	0.29562	0	0	12.0047	28.9372	SKAP1
Regulation Of Integrin Activation (GO:0033623)	232	0.0897709	0.29562	0	0	12.0047	28.9372	SKAP1
Regulation Of Lamellipodium Organization (GO:1902743)	233	0.0897709	0.29562	0	0	12.0047	28.9372	TWF2
Negative Regulation Of Receptor Signaling Pathway Via STAT (GO:1904893)	234	0.0897709	0.29562	0	0	12.0047	28.9372	SOCS3
Activation Of Phospholipase C Activity (GO:0007202)	235	0.0897709	0.29562	0	0	12.0047	28.9372	TXK
Regulation Of Lipopolysaccharide-Mediated Signaling Pathway (GO:0031664)	236	0.0897709	0.29562	0	0	12.0047	28.9372	SIGIRR
Negative Regulation Of Tyrosine Phosphorylation Of STAT Protein (GO:0042532)	237	0.0897709	0.29562	0	0	12.0047	28.9372	SOCS3
Antimicrobial Humoral Immune Response Mediated By Antimicrobial Peptide (GO:0061844)	238	0.0897709	0.29562	0	0	12.0047	28.9372	FAU
Associative Learning (GO:0008306)	239	0.0897709	0.29562	0	0	12.0047	28.9372	RGS14
Cardiac Conduction (GO:0061337)	240	0.0897709	0.29562	0	0	12.0047	28.9372	CAMK2D
Cardiac Muscle Contraction (GO:0060048)	241	0.0897709	0.29562	0	0	12.0047	28.9372	CAMK2D
Positive Regulation Of Actin Nucleation (GO:0051127)	242	0.0897709	0.29562	0	0	12.0047	28.9372	WASF2
Response To Cholesterol (GO:0070723)	243	0.0897709	0.29562	0	0	12.0047	28.9372	SMAD2
Positive Regulation Of Axon Extension (GO:0045773)	244	0.0897709	0.29562	0	0	12.0047	28.9372	TWF2
Response To Purine-Containing Compound (GO:0014074)	245	0.0897709	0.29562	0	0	12.0047	28.9372	ADORA2A
Stem Cell Development (GO:0048864)	246	0.0897709	0.29562	0	0	12.0047	28.9372	PDCD6
Isotype Switching (GO:0045190)	247	0.0897709	0.29562	0	0	12.0047	28.9372	HSPD1
Positive Regulation Of Vascular Associated Smooth Muscle Cell Proliferation (GO:1904707)	248	0.0897709	0.29562	0	0	12.0047	28.9372	JUN
Mitochondrial Protein Processing (GO:0034982)	249	0.0897709	0.29562	0	0	12.0047	28.9372	PMPCB
Regulation Of Blood Circulation (GO:1903522)	250	0.0897709	0.29562	0	0	12.0047	28.9372	CAMK2D
Regulation Of Blood Coagulation (GO:0030193)	251	0.0897709	0.29562	0	0	12.0047	28.9372	SERPINE2
Regulation Of Calcium Ion Transmembrane Transport (GO:1903169)	252	0.0897709	0.29562	0	0	12.0047	28.9372	CAMK2D
Negative Regulation Of Cation Transmembrane Transport (GO:1904063)	253	0.0897709	0.29562	0	0	12.0047	28.9372	CAMK2D
Regulation Of Cardiac Muscle Cell Action Potential (GO:0098901)	254	0.0897709	0.29562	0	0	12.0047	28.9372	CAMK2D
Regulation Of Interleukin-6 Production (GO:0032675)	255	0.0918632	0.29562	0	0	4.10959	9.81147	PYCARD;HSPD1
Cellular Response To Salt (GO:1902075)	256	0.095065	0.29562	0	0	4.02358	9.46828	CAMK2D;HNRNPA1
Defense Response To Bacterium (GO:0042742)	257	0.095065	0.29562	0	0	4.02358	9.46828	PYCARD;FAU
Negative Regulation Of Endoplasmic Reticulum Stress-Induced Intrinsic Apoptotic Signaling Pathway (GO:1902236)	258	0.0992388	0.29562	0	0	10.6698	24.6496	SYVN1
Negative Regulation Of Ion Transmembrane Transporter Activity (GO:0032413)	259	0.0992388	0.29562	0	0	10.6698	24.6496	CAMK2D
UV-damage Excision Repair (GO:0070914)	260	0.0992388	0.29562	0	0	10.6698	24.6496	DDB1
Acute Inflammatory Response (GO:0002526)	261	0.0992388	0.29562	0	0	10.6698	24.6496	SIGIRR
Acylglycerol Catabolic Process (GO:0046464)	262	0.0992388	0.29562	0	0	10.6698	24.6496	PNPLA2
Neural Crest Cell Differentiation (GO:0014033)	263	0.0992388	0.29562	0	0	10.6698	24.6496	PDCD6
Regulation Of Oxidoreductase Activity (GO:0051341)	264	0.0992388	0.29562	0	0	10.6698	24.6496	SZT2
Regulation Of Plasminogen Activation (GO:0010755)	265	0.0992388	0.29562	0	0	10.6698	24.6496	SERPINE2
Carbohydrate Derivative Catabolic Process (GO:1901136)	266	0.0992388	0.29562	0	0	10.6698	24.6496	SAMHD1
Regulation Of Release Of Sequestered Calcium Ion Into Cytosol By Sarcoplasmic Reticulum (GO:0010880)	267	0.0992388	0.29562	0	0	10.6698	24.6496	CAMK2D
Positive Regulation Of Activated T Cell Proliferation (GO:0042104)	268	0.0992388	0.29562	0	0	10.6698	24.6496	PYCARD
Response To Alcohol (GO:0097305)	269	0.0992388	0.29562	0	0	10.6698	24.6496	SMAD2
Positive Regulation Of calcineurin-NFAT Signaling Cascade (GO:0070886)	270	0.0992388	0.29562	0	0	10.6698	24.6496	PPP3CC
Positive Regulation Of Calcineurin-Mediated Signaling (GO:0106058)	271	0.0992388	0.29562	0	0	10.6698	24.6496	PPP3CC
Positive Regulation Of Calcium Ion Transmembrane Transport (GO:1904427)	272	0.0992388	0.29562	0	0	10.6698	24.6496	PPP3CC
Positive Regulation Of Cardiac Muscle Hypertrophy (GO:0010613)	273	0.0992388	0.29562	0	0	10.6698	24.6496	CAMK2D
Retina Homeostasis (GO:0001895)	274	0.0992388	0.29562	0	0	10.6698	24.6496	CCDC66
Early Endosome To Golgi Transport (GO:0034498)	275	0.0992388	0.29562	0	0	10.6698	24.6496	STX10
Sensory Perception (GO:0007600)	276	0.0992388	0.29562	0	0	10.6698	24.6496	ADORA2A
Endocardial Cushion Morphogenesis (GO:0003203)	277	0.0992388	0.29562	0	0	10.6698	24.6496	SMAD2
Endoplasmic Reticulum Mannose Trimming (GO:1904380)	278	0.0992388	0.29562	0	0	10.6698	24.6496	SYVN1
tRNA 5'-Leader Removal (GO:0001682)	279	0.0992388	0.29562	0	0	10.6698	24.6496	POP7
Positive Regulation Of Muscle Hypertrophy (GO:0014742)	280	0.0992388	0.29562	0	0	10.6698	24.6496	CAMK2D
Inositol Phosphate-Mediated Signaling (GO:0048016)	281	0.0992388	0.29562	0	0	10.6698	24.6496	PPP3CC
Regulation Of T Cell Migration (GO:2000404)	282	0.0992388	0.29562	0	0	10.6698	24.6496	PYCARD
Regulation Of cAMP-dependent Protein Kinase Activity (GO:2000479)	283	0.0992388	0.29562	0	0	10.6698	24.6496	PRKAR1B
Regulation Of Cardiac Muscle Contraction By Calcium Ion Signaling (GO:0010882)	284	0.0992388	0.29562	0	0	10.6698	24.6496	CAMK2D
Regulation Of Protein Localization To Plasma Membrane (GO:1903076)	285	0.104858	0.304249	0	0	3.78579	8.53754	VAMP8;CNPY4
Positive Regulation Of Catabolic Process (GO:0009896)	286	0.108181	0.304249	0	0	3.71263	8.2567	DDB1;TNFSF12
Positive Regulation Of Plasma Membrane Bounded Cell Projection Assembly (GO:0120034)	287	0.108181	0.304249	0	0	3.71263	8.2567	TWF2;WASF2
Intracellular Calcium Ion Homeostasis (GO:0006874)	288	0.108181	0.304249	0	0	3.71263	8.2567	CAMK2D;MCUB
Protein Targeting To Mitochondrion (GO:0006626)	289	0.108181	0.304249	0	0	3.71263	8.2567	PMPCB;HSPD1
Regulation Of Platelet Activation (GO:0010543)	290	0.108609	0.304249	0	0	9.60187	21.3162	TXK
Cellular Response To Arsenic-Containing Substance (GO:0071243)	291	0.108609	0.304249	0	0	9.60187	21.3162	HNRNPA1
Regulation Of Voltage-Gated Calcium Channel Activity (GO:1901385)	292	0.108609	0.304249	0	0	9.60187	21.3162	PPP3CC
Positive Regulation Of T Cell Migration (GO:2000406)	293	0.108609	0.304249	0	0	9.60187	21.3162	PYCARD
Response To Axon Injury (GO:0048678)	294	0.108609	0.304249	0	0	9.60187	21.3162	MAPK8IP3
Defense Response To Gram-negative Bacterium (GO:0050829)	295	0.108609	0.304249	0	0	9.60187	21.3162	PYCARD
Endocardial Cushion Development (GO:0003197)	296	0.108609	0.304249	0	0	9.60187	21.3162	SMAD2
Positive Regulation Of Lipid Catabolic Process (GO:0050996)	297	0.108609	0.304249	0	0	9.60187	21.3162	PNPLA2
Positive Regulation Of Phospholipase C Activity (GO:0010863)	298	0.108609	0.304249	0	0	9.60187	21.3162	TXK
Long-Term Memory (GO:0007616)	299	0.108609	0.304249	0	0	9.60187	21.3162	RGS14
Primary miRNA Processing (GO:0031053)	300	0.108609	0.304249	0	0	9.60187	21.3162	SMAD2
Protein Localization To Vacuole (GO:0072665)	301	0.108609	0.304249	0	0	9.60187	21.3162	SZT2
Negative Regulation Of Cytokine Production Involved In Inflammatory Response (GO:1900016)	302	0.108609	0.304249	0	0	9.60187	21.3162	PYCARD
Positive Regulation Of Apoptotic Process (GO:0043065)	303	0.109073	0.304541	0	0	2.27463	5.03998	PYCARD;JUN;BTG1;HSPD1
Cellular Response To Transforming Growth Factor Beta Stimulus (GO:0071560)	304	0.111532	0.306858	0	0	3.64222	7.989	SMAD2;JUN
Negative Regulation Of Programmed Cell Death (GO:0043069)	305	0.113049	0.306858	0	0	2.02292	4.40983	SOCS3;AMIGO2;RAF1;MAPK8IP3;HSPD1
Negative Regulation Of Lipid Storage (GO:0010888)	306	0.117883	0.306858	0	0	8.72812	18.6613	PNPLA2
Actin Filament Capping (GO:0051693)	307	0.117883	0.306858	0	0	8.72812	18.6613	TWF2
Acylglycerol Biosynthetic Process (GO:0046463)	308	0.117883	0.306858	0	0	8.72812	18.6613	PNPLA2
Regulation Of Lymphocyte Activation (GO:0051249)	309	0.117883	0.306858	0	0	8.72812	18.6613	THEMIS2
Ameboidal-Type Cell Migration (GO:0001667)	310	0.117883	0.306858	0	0	8.72812	18.6613	PKN1
Barbed-End Actin Filament Capping (GO:0051016)	311	0.117883	0.306858	0	0	8.72812	18.6613	TWF2
Oligosaccharide-Lipid Intermediate Biosynthetic Process (GO:0006490)	312	0.117883	0.306858	0	0	8.72812	18.6613	PDCD6
Regulation Of Protein Processing (GO:0070613)	313	0.117883	0.306858	0	0	8.72812	18.6613	SERPINE2
Phosphatidylglycerol Metabolic Process (GO:0046471)	314	0.117883	0.306858	0	0	8.72812	18.6613	CRLS1
Positive Regulation Of BMP Signaling Pathway (GO:0030513)	315	0.117883	0.306858	0	0	8.72812	18.6613	SMAD2
Cellular Response To Unfolded Protein (GO:0034620)	316	0.117883	0.306858	0	0	8.72812	18.6613	HSPD1
Response To Cadmium Ion (GO:0046686)	317	0.117883	0.306858	0	0	8.72812	18.6613	JUN
Positive Regulation Of Glucose Metabolic Process (GO:0010907)	318	0.117883	0.306858	0	0	8.72812	18.6613	DDB1
Positive Regulation Of Interferon-Alpha Production (GO:0032727)	319	0.117883	0.306858	0	0	8.72812	18.6613	HSPD1
tRNA 5'-End Processing (GO:0099116)	320	0.117883	0.306858	0	0	8.72812	18.6613	POP7
Pseudouridine Synthesis (GO:0001522)	321	0.117883	0.306858	0	0	8.72812	18.6613	RPUSD4
Pulmonary Valve Development (GO:0003177)	322	0.117883	0.306858	0	0	8.72812	18.6613	SMAD2
Negative Regulation Of Actin Filament Polymerization (GO:0030837)	323	0.117883	0.306858	0	0	8.72812	18.6613	TWF2
Negative Regulation Of Calcium Ion Transmembrane Transport (GO:1903170)	324	0.117883	0.306858	0	0	8.72812	18.6613	PPP3CC
Regulation Of Calcium Ion Transmembrane Transporter Activity (GO:1901019)	325	0.117883	0.306858	0	0	8.72812	18.6613	CAMK2D
Vesicle Fusion (GO:0006906)	326	0.118315	0.307038	0	0	3.50909	7.48982	VAMP8;STX10
Cellular Response To Metal Ion (GO:0071248)	327	0.121745	0.313392	0	0	3.44609	7.25688	CAMK2D;JUN
Positive Regulation Of T Cell Activation (GO:0050870)	328	0.125199	0.313392	0	0	3.3853	7.03416	PYCARD;HSPD1
Positive Regulation Of Stress-Activated MAPK Cascade (GO:0032874)	329	0.125199	0.313392	0	0	3.3853	7.03416	PYCARD;MAPK8IP3
Regulation Of Macrophage Activation (GO:0043030)	330	0.127061	0.313392	0	0	8	16.5047	HSPD1
Negative Regulation Of Type I Interferon-Mediated Signaling Pathway (GO:0060339)	331	0.127061	0.313392	0	0	8	16.5047	SAMHD1
Antimicrobial Humoral Response (GO:0019730)	332	0.127061	0.313392	0	0	8	16.5047	FAU
Regulation Of Ryanodine-Sensitive Calcium-Release Channel Activity (GO:0060314)	333	0.127061	0.313392	0	0	8	16.5047	CAMK2D
Positive Regulation By Host Of Viral Transcription (GO:0043923)	334	0.127061	0.313392	0	0	8	16.5047	JUN
Cellular Response To Retinoic Acid (GO:0071300)	335	0.127061	0.313392	0	0	8	16.5047	TWF2
Regulation Of Vascular Endothelial Growth Factor Receptor Signaling Pathway (GO:0030947)	336	0.127061	0.313392	0	0	8	16.5047	PDCD6
Positive Regulation Of Calcium Ion Transmembrane Transporter Activity (GO:1901021)	337	0.127061	0.313392	0	0	8	16.5047	PPP3CC
Dolichol Metabolic Process (GO:0019348)	338	0.127061	0.313392	0	0	8	16.5047	PDCD6
Vitamin Transport (GO:0051180)	339	0.127061	0.313392	0	0	8	16.5047	CD320
Positive Regulation Of Triglyceride Metabolic Process (GO:0090208)	340	0.127061	0.313392	0	0	8	16.5047	PNPLA2
Protein Alpha-1,2-Demannosylation (GO:0036508)	341	0.127061	0.313392	0	0	8	16.5047	SYVN1
Regulation Of B Cell Activation (GO:0050864)	342	0.127061	0.313392	0	0	8	16.5047	THEMIS2
Negative Regulation Of G Protein-Coupled Receptor Signaling Pathway (GO:0045744)	343	0.127061	0.313392	0	0	8	16.5047	RGS14
Ubiquitin-Dependent ERAD Pathway (GO:0030433)	344	0.128677	0.316455	0	0	3.32661	6.82106	SYVN1;TMUB1
Positive Regulation Of Protein Catabolic Process (GO:0045732)	345	0.132177	0.31727	0	0	3.26991	6.61703	DDB1;TNFSF12
Positive Regulation Of Protein-Containing Complex Assembly (GO:0031334)	346	0.132177	0.31727	0	0	3.26991	6.61703	SKAP1;TRABD2A
Golgi To Vacuole Transport (GO:0006896)	347	0.136144	0.31727	0	0	7.3839	14.7238	VPS54
Negative Regulation Of Receptor Signaling Pathway Via JAK-STAT (GO:0046426)	348	0.136144	0.31727	0	0	7.3839	14.7238	SOCS3
Negative Regulation Of Stress Fiber Assembly (GO:0051497)	349	0.136144	0.31727	0	0	7.3839	14.7238	WASF2
Amyloid Fibril Formation (GO:1990000)	350	0.136144	0.31727	0	0	7.3839	14.7238	HNRNPA1
Neutrophil Chemotaxis (GO:0030593)	351	0.136144	0.31727	0	0	7.3839	14.7238	JAML
Blood Circulation (GO:0008015)	352	0.136144	0.31727	0	0	7.3839	14.7238	ADORA2A
Regulation Of Platelet Aggregation (GO:0090330)	353	0.136144	0.31727	0	0	7.3839	14.7238	SERPINE2
Cellular Response To Cadmium Ion (GO:0071276)	354	0.136144	0.31727	0	0	7.3839	14.7238	JUN
Regulation Of Sodium Ion Transmembrane Transport (GO:1902305)	355	0.136144	0.31727	0	0	7.3839	14.7238	CAMK2D
Regulation Of Vascular Associated Smooth Muscle Cell Proliferation (GO:1904705)	356	0.136144	0.31727	0	0	7.3839	14.7238	JUN
Chloride Transmembrane Transport (GO:1902476)	357	0.136144	0.31727	0	0	7.3839	14.7238	SLC12A9
Defense Response To Gram-positive Bacterium (GO:0050830)	358	0.136144	0.31727	0	0	7.3839	14.7238	FAU
Dolichol-Linked Oligosaccharide Biosynthetic Process (GO:0006488)	359	0.136144	0.31727	0	0	7.3839	14.7238	PDCD6
Toll-Like Receptor Signaling Pathway (GO:0002224)	360	0.136144	0.31727	0	0	7.3839	14.7238	HSPD1
Positive Regulation Of Mitochondrial Translation (GO:0070131)	361	0.136144	0.31727	0	0	7.3839	14.7238	RPUSD4
Lipid Modification (GO:0030258)	362	0.136144	0.31727	0	0	7.3839	14.7238	DGKA
T Cell Activation (GO:0042110)	363	0.139242	0.31727	0	0	3.16208	6.23417	JAML;HSPD1
Transmembrane Receptor Protein Serine/Threonine Kinase Signaling Pathway (GO:0007178)	364	0.142806	0.31727	0	0	3.11077	6.05441	SMAD2;JUN
Macromolecule Catabolic Process (GO:0009057)	365	0.142806	0.31727	0	0	3.11077	6.05441	RNASET2;UCHL3
Cellular Response To Oxygen-Containing Compound (GO:1901701)	366	0.145049	0.31727	0	0	2.03242	3.92396	PYCARD;CAMK2D;JUN;TWF2
Regulation Of Interferon-Alpha Production (GO:0032647)	367	0.145134	0.31727	0	0	6.85581	13.2324	HSPD1
Negative Regulation Of Telomere Maintenance Via Telomerase (GO:0032211)	368	0.145134	0.31727	0	0	6.85581	13.2324	HNRNPA1
Regulation Of Sodium Ion Transmembrane Transporter Activity (GO:2000649)	369	0.145134	0.31727	0	0	6.85581	13.2324	CAMK2D
Regulation Of Sodium Ion Transport (GO:0002028)	370	0.145134	0.31727	0	0	6.85581	13.2324	ATP1A1
Positive Regulation Of B Cell Proliferation (GO:0030890)	371	0.145134	0.31727	0	0	6.85581	13.2324	CD320
Cellular Response To Steroid Hormone Stimulus (GO:0071383)	372	0.145134	0.31727	0	0	6.85581	13.2324	ATP1A1
Chaperone-Mediated Protein Complex Assembly (GO:0051131)	373	0.145134	0.31727	0	0	6.85581	13.2324	HSPD1
Positive Regulation Of Cation Channel Activity (GO:2001259)	374	0.145134	0.31727	0	0	6.85581	13.2324	PPP3CC
Ribosomal Small Subunit Assembly (GO:0000028)	375	0.145134	0.31727	0	0	6.85581	13.2324	ERAL1
Endoplasmic Reticulum To Cytosol Transport (GO:1903513)	376	0.145134	0.31727	0	0	6.85581	13.2324	SYVN1
Positive Regulation Of Interleukin-12 Production (GO:0032735)	377	0.145134	0.31727	0	0	6.85581	13.2324	HSPD1
Vesicle Docking (GO:0048278)	378	0.145134	0.31727	0	0	6.85581	13.2324	STX10
Positive Regulation Of Receptor Signaling Pathway Via JAK-STAT (GO:0046427)	379	0.145134	0.31727	0	0	6.85581	13.2324	IL10RA
Positive Regulation Of Translational Initiation (GO:0045948)	380	0.145134	0.31727	0	0	6.85581	13.2324	CDC123
Lymphocyte Proliferation (GO:0046651)	381	0.145134	0.31727	0	0	6.85581	13.2324	HSPD1
Mitochondrial Calcium Ion Homeostasis (GO:0051560)	382	0.145134	0.31727	0	0	6.85581	13.2324	MCUB
Pyroptosis (GO:0070269)	383	0.145134	0.31727	0	0	6.85581	13.2324	PYCARD
Negative Regulation Of Actin Filament Bundle Assembly (GO:0032232)	384	0.145134	0.31727	0	0	6.85581	13.2324	WASF2
Negative Regulation Of Cation Channel Activity (GO:2001258)	385	0.145134	0.31727	0	0	6.85581	13.2324	PPP3CC
Regulation Of Cardiac Muscle Hypertrophy (GO:0010611)	386	0.145134	0.31727	0	0	6.85581	13.2324	CAMK2D
Regulation Of Cell Cycle Phase Transition (GO:1901987)	387	0.145134	0.31727	0	0	6.85581	13.2324	DDB1
Regulation Of Protein Localization (GO:0032880)	388	0.14999	0.32255	0	0	3.01297	5.71618	CCDC66;STX10
Regulation Of JNK Cascade (GO:0046328)	389	0.14999	0.32255	0	0	3.01297	5.71618	PYCARD;MAPK8IP3
Regulation Of Cellular Response To Transforming Growth Factor Beta Stimulus (GO:1903844)	390	0.154031	0.32255	0	0	6.39813	11.9683	SMAD2
Negative Regulation Of Immune System Process (GO:0002683)	391	0.154031	0.32255	0	0	6.39813	11.9683	TSC22D3
Regulation Of Endoplasmic Reticulum Stress-Induced Intrinsic Apoptotic Signaling Pathway (GO:1902235)	392	0.154031	0.32255	0	0	6.39813	11.9683	SYVN1
Negative Regulation Of Protein Polymerization (GO:0032272)	393	0.154031	0.32255	0	0	6.39813	11.9683	TWF2
Negative Regulation Of Secretion By Cell (GO:1903531)	394	0.154031	0.32255	0	0	6.39813	11.9683	VAMP8
Neutrophil Migration (GO:1990266)	395	0.154031	0.32255	0	0	6.39813	11.9683	JAML
Positive Regulation Of Axonogenesis (GO:0050772)	396	0.154031	0.32255	0	0	6.39813	11.9683	TWF2
Positive Regulation Of Cell Development (GO:0010720)	397	0.154031	0.32255	0	0	6.39813	11.9683	RGS14
Response To Steroid Hormone (GO:0048545)	398	0.154031	0.32255	0	0	6.39813	11.9683	ATP1A1
Positive Regulation Of Endopeptidase Activity (GO:0010950)	399	0.154031	0.32255	0	0	6.39813	11.9683	PYCARD
Sodium Ion Transmembrane Transport (GO:0035725)	400	0.154031	0.32255	0	0	6.39813	11.9683	ATP1A1
tRNA Metabolic Process (GO:0006399)	401	0.154031	0.32255	0	0	6.39813	11.9683	POP7
Positive Regulation Of Nervous System Development (GO:0051962)	402	0.154031	0.32255	0	0	6.39813	11.9683	RGS14
Positive Regulation Of Receptor Signaling Pathway Via STAT (GO:1904894)	403	0.154031	0.32255	0	0	6.39813	11.9683	IL10RA
Learning (GO:0007612)	404	0.154031	0.32255	0	0	6.39813	11.9683	RGS14
Central Nervous System Development (GO:0007417)	405	0.157964	0.328782	0	0	2.24917	4.15059	SZT2;ADORA2A;AMIGO2
Vesicle Organization (GO:0016050)	406	0.160898	0.328782	0	0	2.87722	5.25663	VAMP8;STX10
Protein Catabolic Process (GO:0030163)	407	0.160898	0.328782	0	0	2.87722	5.25663	DDB1;UCHL3
COPII Vesicle Coating (GO:0048208)	408	0.162837	0.328782	0	0	5.99766	10.8858	PDCD6
Regulation Of Metal Ion Transport (GO:0010959)	409	0.162837	0.328782	0	0	5.99766	10.8858	ATP1A1
Aortic Valve Morphogenesis (GO:0003180)	410	0.162837	0.328782	0	0	5.99766	10.8858	SMAD2
Regulation Of Protein Localization To Cell Periphery (GO:1904375)	411	0.162837	0.328782	0	0	5.99766	10.8858	VAMP8
Positive Regulation Of Cell-Cell Adhesion (GO:0022409)	412	0.162837	0.328782	0	0	5.99766	10.8858	SKAP1
Retrograde Protein Transport, ER To Cytosol (GO:0030970)	413	0.162837	0.328782	0	0	5.99766	10.8858	SYVN1
Granulocyte Chemotaxis (GO:0071621)	414	0.162837	0.328782	0	0	5.99766	10.8858	JAML
Vesicle Targeting, Rough ER To cis-Golgi (GO:0048207)	415	0.162837	0.328782	0	0	5.99766	10.8858	PDCD6
Icosanoid Metabolic Process (GO:0006690)	416	0.162837	0.328782	0	0	5.99766	10.8858	PYCARD
Positive Regulation Of Smooth Muscle Cell Proliferation (GO:0048661)	417	0.162837	0.328782	0	0	5.99766	10.8858	JUN
Regulation Of Activated T Cell Proliferation (GO:0046006)	418	0.162837	0.328782	0	0	5.99766	10.8858	PYCARD
Negative Regulation Of Calcium Ion Transmembrane Transporter Activity (GO:1901020)	419	0.162837	0.328782	0	0	5.99766	10.8858	PPP3CC
Retrograde Transport, Endosome To Golgi (GO:0042147)	420	0.164566	0.331484	0	0	2.83463	5.11492	VPS54;STX10
Negative Regulation Of Response To Endoplasmic Reticulum Stress (GO:1903573)	421	0.171551	0.33673	0	0	5.64431	9.95021	SYVN1
Regulation Of Microtubule Polymerization Or Depolymerization (GO:0031110)	422	0.171551	0.33673	0	0	5.64431	9.95021	FKBP4
Neural Crest Cell Development (GO:0014032)	423	0.171551	0.33673	0	0	5.64431	9.95021	PDCD6
Regulation Of Transmembrane Receptor Protein Serine/Threonine Kinase Signaling Pathway (GO:0090092)	424	0.171551	0.33673	0	0	5.64431	9.95021	SMAD2
Cellular Response To Osmotic Stress (GO:0071470)	425	0.171551	0.33673	0	0	5.64431	9.95021	PYCARD
Endoplasmic Reticulum Calcium Ion Homeostasis (GO:0032469)	426	0.171551	0.33673	0	0	5.64431	9.95021	CAMK2D
Endothelial Cell Migration (GO:0043542)	427	0.171551	0.33673	0	0	5.64431	9.95021	TNFSF12
Vascular Endothelial Growth Factor Receptor Signaling Pathway (GO:0048010)	428	0.171551	0.33673	0	0	5.64431	9.95021	PDCD6
Homophilic Cell Adhesion Via Plasma Membrane Adhesion Molecules (GO:0007156)	429	0.171551	0.33673	0	0	5.64431	9.95021	AMIGO2
Lipid Droplet Organization (GO:0034389)	430	0.171551	0.33673	0	0	5.64431	9.95021	PNPLA2
Monoatomic Anion Transmembrane Transport (GO:0098656)	431	0.171551	0.33673	0	0	5.64431	9.95021	SLC12A9
ERAD Pathway (GO:0036503)	432	0.171947	0.33673	0	0	2.7531	4.84702	SYVN1;TMUB1
Ribosomal Small Subunit Biogenesis (GO:0042274)	433	0.179383	0.344083	0	0	2.6761	4.59817	RPS8;ERAL1
RNA Phosphodiester Bond Hydrolysis (GO:0090501)	434	0.180176	0.344083	0	0	5.33022	9.13505	POP7
Regulation Of Histone Deacetylation (GO:0031063)	435	0.180176	0.344083	0	0	5.33022	9.13505	CAMK2D
Negative Regulation Of Peptidase Activity (GO:0010466)	436	0.180176	0.344083	0	0	5.33022	9.13505	SERPINE2
Regulation Of Intracellular Steroid Hormone Receptor Signaling Pathway (GO:0033143)	437	0.180176	0.344083	0	0	5.33022	9.13505	PKN1
Positive Regulation Of Chemokine Production (GO:0032722)	438	0.180176	0.344083	0	0	5.33022	9.13505	PYCARD
Positive Regulation Of Developmental Growth (GO:0048639)	439	0.180176	0.344083	0	0	5.33022	9.13505	TWF2
Heart Morphogenesis (GO:0003007)	440	0.180176	0.344083	0	0	5.33022	9.13505	SMAD2
Mitotic Sister Chromatid Cohesion (GO:0007064)	441	0.180176	0.344083	0	0	5.33022	9.13505	RAD21
Negative Regulation Of DNA Biosynthetic Process (GO:2000279)	442	0.180176	0.344083	0	0	5.33022	9.13505	HNRNPA1
Negative Regulation Of TORC1 Signaling (GO:1904262)	443	0.180176	0.344083	0	0	5.33022	9.13505	SZT2
Negative Regulation Of Response To External Stimulus (GO:0032102)	444	0.183119	0.347065	0	0	2.63918	4.48033	SIGIRR;IL10RA
Protein Homooligomerization (GO:0051260)	445	0.186867	0.347065	0	0	2.60326	4.36661	PYCARD;SAMHD1
Negative Regulation Of Microtubule Polymerization Or Depolymerization (GO:0031111)	446	0.188711	0.347065	0	0	5.04919	8.4197	FKBP4
Negative Regulation Of Proteolysis (GO:0045861)	447	0.188711	0.347065	0	0	5.04919	8.4197	SERPINE2
Negative Regulation Of Telomere Maintenance Via Telomere Lengthening (GO:1904357)	448	0.188711	0.347065	0	0	5.04919	8.4197	HNRNPA1
Aortic Valve Development (GO:0003176)	449	0.188711	0.347065	0	0	5.04919	8.4197	SMAD2
Carbohydrate Derivative Biosynthetic Process (GO:1901137)	450	0.188711	0.347065	0	0	5.04919	8.4197	PDCD6
Cellular Defense Response (GO:0006968)	451	0.188711	0.347065	0	0	5.04919	8.4197	ADORA2A
Response To Estrogen (GO:0043627)	452	0.188711	0.347065	0	0	5.04919	8.4197	ASH2L
Positive Regulation Of Epithelial To Mesenchymal Transition (GO:0010718)	453	0.188711	0.347065	0	0	5.04919	8.4197	SMAD2
Positive Regulation Of Interleukin-1 Beta Production (GO:0032731)	454	0.188711	0.347065	0	0	5.04919	8.4197	PYCARD
Import Into Cell (GO:0098657)	455	0.188711	0.347065	0	0	5.04919	8.4197	IL10RA
Positive Regulation Of Release Of Cytochrome C From Mitochondria (GO:0090200)	456	0.188711	0.347065	0	0	5.04919	8.4197	PYCARD
Regulation Of Arp2/3 Complex-Mediated Actin Nucleation (GO:0034315)	457	0.188711	0.347065	0	0	5.04919	8.4197	WASF2
Regulation Of Axon Extension (GO:0030516)	458	0.188711	0.347065	0	0	5.04919	8.4197	TWF2
Regulation Of calcineurin-NFAT Signaling Cascade (GO:0070884)	459	0.188711	0.347065	0	0	5.04919	8.4197	PPP3CC
Regulation Of Cation Channel Activity (GO:2001257)	460	0.188711	0.347065	0	0	5.04919	8.4197	CAMK2D
Phosphatidylinositol Biosynthetic Process (GO:0006661)	461	0.194395	0.351892	0	0	2.53426	4.15077	SOCS3;CISH
Negative Regulation Of Endopeptidase Activity (GO:0010951)	462	0.197159	0.351892	0	0	4.79626	7.7879	SERPINE2
Regulation Of Gluconeogenesis (GO:0006111)	463	0.197159	0.351892	0	0	4.79626	7.7879	DDB1
Anterior/Posterior Pattern Specification (GO:0009952)	464	0.197159	0.351892	0	0	4.79626	7.7879	SMAD2
Regulation Of Protein Localization To Membrane (GO:1905475)	465	0.197159	0.351892	0	0	4.79626	7.7879	VAMP8
Regulation Of Release Of Sequestered Calcium Ion Into Cytosol (GO:0051279)	466	0.197159	0.351892	0	0	4.79626	7.7879	CAMK2D
Phosphatidic Acid Biosynthetic Process (GO:0006654)	467	0.197159	0.351892	0	0	4.79626	7.7879	DGKA
Regulation Of Tyrosine Phosphorylation Of STAT Protein (GO:0042509)	468	0.197159	0.351892	0	0	4.79626	7.7879	SOCS3
Chloride Transport (GO:0006821)	469	0.197159	0.351892	0	0	4.79626	7.7879	SLC12A9
Triglyceride Metabolic Process (GO:0006641)	470	0.197159	0.351892	0	0	4.79626	7.7879	PNPLA2
Protein Depolymerization (GO:0051261)	471	0.197159	0.351892	0	0	4.79626	7.7879	TWF2
Protein Localization To Chromatin (GO:0071168)	472	0.197159	0.351892	0	0	4.79626	7.7879	RAD21
Negative Regulation Of DNA Binding (GO:0043392)	473	0.197159	0.351892	0	0	4.79626	7.7879	JUN
Regulation Of Androgen Receptor Signaling Pathway (GO:0060765)	474	0.197159	0.351892	0	0	4.79626	7.7879	PKN1
Regulation Of Protein Serine/Threonine Kinase Activity (GO:0071900)	475	0.198174	0.352958	0	0	2.5011	4.04831	PYCARD;CNPPD1
Protein Stabilization (GO:0050821)	476	0.199288	0.354196	0	0	1.99783	3.22251	SYVN1;MAPK8IP3;HSPD1
Regulation Of Cell Growth (GO:0001558)	477	0.201955	0.357436	0	0	1.98395	3.17375	CAMK2D;BTG1;CISH
Regulation Of Protein-Containing Complex Assembly (GO:0043254)	478	0.201962	0.357436	0	0	2.4688	3.94928	RAF1;TRABD2A
Regulation Of Heart Contraction (GO:0008016)	479	0.20552	0.357436	0	0	4.56742	7.22664	CAMK2D
Negative Regulation Of Peptidyl-Tyrosine Phosphorylation (GO:0050732)	480	0.20552	0.357436	0	0	4.56742	7.22664	SOCS3
Regulation Of Mitochondrial Translation (GO:0070129)	481	0.20552	0.357436	0	0	4.56742	7.22664	RPUSD4
Regulation Of Response To Biotic Stimulus (GO:0002831)	482	0.20552	0.357436	0	0	4.56742	7.22664	SAMHD1
Phosphatidic Acid Metabolic Process (GO:0046473)	483	0.20552	0.357436	0	0	4.56742	7.22664	DGKA
Positive Regulation Of Cell-Matrix Adhesion (GO:0001954)	484	0.20552	0.357436	0	0	4.56742	7.22664	SKAP1
Protein Exit From Endoplasmic Reticulum (GO:0032527)	485	0.20552	0.357436	0	0	4.56742	7.22664	SYVN1
Regulation Of B Cell Proliferation (GO:0030888)	486	0.20552	0.357436	0	0	4.56742	7.22664	CD320
Regulation Of Neuron Projection Development (GO:0010975)	487	0.205758	0.357436	0	0	2.43731	3.85351	TWF2;FKBP4
DNA-templated Transcription (GO:0006351)	488	0.212706	0.363192	0	0	1.93029	2.98778	DRAP1;SMAD2;PMF1
Regulation Of Interleukin-12 Production (GO:0032655)	489	0.213794	0.363192	0	0	4.35939	6.72542	HSPD1
Adenylate Cyclase-Activating G Protein-Coupled Receptor Signaling Pathway (GO:0007189)	490	0.213794	0.363192	0	0	4.35939	6.72542	ADORA2A
Cellular Response To Heat (GO:0034605)	491	0.213794	0.363192	0	0	4.35939	6.72542	PDCD6
Positive Regulation Of Actin Filament Polymerization (GO:0030838)	492	0.213794	0.363192	0	0	4.35939	6.72542	PYCARD
Positive Regulation Of Interleukin-1 Production (GO:0032732)	493	0.213794	0.363192	0	0	4.35939	6.72542	PYCARD
Positive Regulation Of miRNA Transcription (GO:1902895)	494	0.213794	0.363192	0	0	4.35939	6.72542	JUN
Integrated Stress Response Signaling (GO:0140467)	495	0.213794	0.363192	0	0	4.35939	6.72542	JUN
Positive Regulation Of Synaptic Transmission (GO:0050806)	496	0.213794	0.363192	0	0	4.35939	6.72542	RGS14
Memory (GO:0007613)	497	0.213794	0.363192	0	0	4.35939	6.72542	RGS14
Microtubule Bundle Formation (GO:0001578)	498	0.213794	0.363192	0	0	4.35939	6.72542	CCDC66
Phosphorylation (GO:0016310)	499	0.214727	0.364045	0	0	1.60451	2.46837	CAMK2D;PRKAR1B;DGKA;TXK;PKN1
Protein Transport (GO:0015031)	500	0.217114	0.367357	0	0	1.71171	2.61435	IL10RA;PDCD6;TMED3;STX10
Response To Endoplasmic Reticulum Stress (GO:0034976)	501	0.221018	0.370409	0	0	2.31894	3.50046	JUN;SYVN1
Cytoplasmic Translation (GO:0002181)	502	0.221018	0.370409	0	0	2.31894	3.50046	RPS8;FAU
Regulation Of Phagocytosis (GO:0050764)	503	0.221983	0.370409	0	0	4.16944	6.27566	PYCARD
Positive Regulation Of T Cell Mediated Immunity (GO:0002711)	504	0.221983	0.370409	0	0	4.16944	6.27566	HSPD1
Response To Retinoic Acid (GO:0032526)	505	0.221983	0.370409	0	0	4.16944	6.27566	TWF2
Positive Regulation Of Phagocytosis (GO:0050766)	506	0.221983	0.370409	0	0	4.16944	6.27566	PYCARD
Negative Regulation Of ERK1 And ERK2 Cascade (GO:0070373)	507	0.221983	0.370409	0	0	4.16944	6.27566	RGS14
Regulation Of ERK1 And ERK2 Cascade (GO:0070372)	508	0.224848	0.374334	0	0	2.29111	3.41908	PYCARD;RGS14
Golgi Vesicle Transport (GO:0048193)	509	0.226318	0.374334	0	0	1.8671	2.77416	PDCD6;TMED3;STX10
Positive Regulation Of Translation (GO:0045727)	510	0.228684	0.374334	0	0	2.26393	3.34023	RPUSD4;CDC123
Regulation Of Cytokine Production Involved In Inflammatory Response (GO:1900015)	511	0.230087	0.374334	0	0	3.99533	5.87032	PYCARD
Negative Regulation Of Mitotic Cell Cycle (GO:0045930)	512	0.230087	0.374334	0	0	3.99533	5.87032	BTG1
Negative Regulation Of Neuron Projection Development (GO:0010977)	513	0.230087	0.374334	0	0	3.99533	5.87032	FKBP4
Negative Regulation Of Protein Kinase B Signaling (GO:0051898)	514	0.230087	0.374334	0	0	3.99533	5.87032	PDCD6
Pattern Recognition Receptor Signaling Pathway (GO:0002221)	515	0.230087	0.374334	0	0	3.99533	5.87032	PYCARD
Regulation Of Type I Interferon-Mediated Signaling Pathway (GO:0060338)	516	0.230087	0.374334	0	0	3.99533	5.87032	SAMHD1
Positive Regulation Of Interleukin-8 Production (GO:0032757)	517	0.230087	0.374334	0	0	3.99533	5.87032	PYCARD
Inorganic Anion Transmembrane Transport (GO:0098661)	518	0.230087	0.374334	0	0	3.99533	5.87032	SLC12A9
Positive Regulation Of Viral Genome Replication (GO:0045070)	519	0.230087	0.374334	0	0	3.99533	5.87032	DDB1
Regulation Of Cell Communication (GO:0010646)	520	0.230087	0.374334	0	0	3.99533	5.87032	CAMK2D
Positive Regulation Of Cytokine Production (GO:0001819)	521	0.23181	0.37613	0	0	1.84295	2.69409	PYCARD;TXK;HSPD1
Regulation Of Protein Catabolic Process (GO:0042176)	522	0.232525	0.37613	0	0	2.23738	3.26381	DDB1;TNFSF12
Negative Regulation Of Cytokine Production (GO:0001818)	523	0.232525	0.37613	0	0	2.23738	3.26381	PYCARD;SIGIRR
DNA Damage Response (GO:0006974)	524	0.235588	0.377227	0	0	1.54642	2.23561	DDB1;ZBTB38;NUDT1;ASH2L;SAMHD1
Apoptotic Mitochondrial Changes (GO:0008637)	525	0.238108	0.377227	0	0	3.83514	5.50355	HSPD1
Regulation Of Secretion By Cell (GO:1903530)	526	0.238108	0.377227	0	0	3.83514	5.50355	VAMP8
Cellular Response To Calcium Ion (GO:0071277)	527	0.238108	0.377227	0	0	3.83514	5.50355	CAMK2D
Signal Transduction By P53 Class Mediator (GO:0072331)	528	0.238108	0.377227	0	0	3.83514	5.50355	PYCARD
Transcription Initiation-Coupled Chromatin Remodeling (GO:0045815)	529	0.238108	0.377227	0	0	3.83514	5.50355	ASH2L
Positive Regulation Of Myoblast Differentiation (GO:0045663)	530	0.238108	0.377227	0	0	3.83514	5.50355	BTG1
Vesicle Coating (GO:0006901)	531	0.238108	0.377227	0	0	3.83514	5.50355	PDCD6
mRNA Modification (GO:0016556)	532	0.238108	0.377227	0	0	3.83514	5.50355	RPUSD4
miRNA Processing (GO:0035196)	533	0.238108	0.377227	0	0	3.83514	5.50355	SMAD2
Negative Regulation Of Cell Projection Organization (GO:0031345)	534	0.238108	0.377227	0	0	3.83514	5.50355	FKBP4
Positive Regulation Of Programmed Cell Death (GO:0043068)	535	0.240095	0.379665	0	0	1.80786	2.57931	PYCARD;JUN;HSPD1
RNA Transport (GO:0050658)	536	0.246046	0.384759	0	0	3.68728	5.17044	HNRNPA1
Response To Organic Cyclic Compound (GO:0014070)	537	0.246046	0.384759	0	0	3.68728	5.17044	ADORA2A
Positive Regulation Of Cytokine-Mediated Signaling Pathway (GO:0001961)	538	0.246046	0.384759	0	0	3.68728	5.17044	TXK
Positive Regulation Of miRNA Metabolic Process (GO:2000630)	539	0.246046	0.384759	0	0	3.68728	5.17044	JUN
Maturation Of SSU-rRNA From Tricistronic rRNA Transcript (SSU-rRNA, 5.8S rRNA, LSU-rRNA) (GO:0000462)	540	0.246046	0.384759	0	0	3.68728	5.17044	RPS8
Modulation By Host Of Symbiont Process (GO:0051851)	541	0.246046	0.384759	0	0	3.68728	5.17044	JUN
Protein Modification Process (GO:0036211)	542	0.253692	0.393408	0	0	1.39425	1.9124	CAMK2D;PPP3CC;PRKAR1B;PDCD6;TXK;PKN1;UCHL3
Nucleic Acid-Templated Transcription (GO:0097659)	543	0.253902	0.393408	0	0	3.55036	4.86687	SMAD2
Protein Homotetramerization (GO:0051289)	544	0.253902	0.393408	0	0	3.55036	4.86687	SAMHD1
Purine Ribonucleotide Biosynthetic Process (GO:0009152)	545	0.253902	0.393408	0	0	3.55036	4.86687	AK5
Negative Regulation Of MAP Kinase Activity (GO:0043407)	546	0.253902	0.393408	0	0	3.55036	4.86687	RGS14
Cellular Response To Starvation (GO:0009267)	547	0.259498	0.39888	0	0	2.06756	2.78915	SZT2;HNRNPA1
Defense Response To Symbiont (GO:0140546)	548	0.259498	0.39888	0	0	2.06756	2.78915	PYCARD;SAMHD1
Negative Regulation Of Type I Interferon Production (GO:0032480)	549	0.261676	0.39888	0	0	3.42323	4.58934	PYCARD
Regulation Of Release Of Cytochrome C From Mitochondria (GO:0090199)	550	0.261676	0.39888	0	0	3.42323	4.58934	PYCARD
Positive Regulation Of B Cell Activation (GO:0050871)	551	0.261676	0.39888	0	0	3.42323	4.58934	CD320
Tumor Necrosis Factor-Mediated Signaling Pathway (GO:0033209)	552	0.261676	0.39888	0	0	3.42323	4.58934	PYCARD
Positive Regulation Of Telomere Maintenance Via Telomerase (GO:0032212)	553	0.261676	0.39888	0	0	3.42323	4.58934	HNRNPA1
Proton Transmembrane Transport (GO:1902600)	554	0.261676	0.39888	0	0	3.42323	4.58934	ATP1A1
Negative Regulation Of Cysteine-Type Endopeptidase Activity (GO:2000117)	555	0.261676	0.39888	0	0	3.42323	4.58934	RAF1
Endoplasmic Reticulum To Golgi Vesicle-Mediated Transport (GO:0006888)	556	0.263359	0.400002	0	0	2.04536	2.729	PDCD6;TMED3
Negative Regulation Of DNA-binding Transcription Factor Activity (GO:0043433)	557	0.263359	0.400002	0	0	2.04536	2.729	PYCARD;SIGIRR
Regulation Of Endopeptidase Activity (GO:0052548)	558	0.269371	0.402629	0	0	3.30487	4.33488	SERPINE2
Anterograde Axonal Transport (GO:0008089)	559	0.269371	0.402629	0	0	3.30487	4.33488	MAPK8IP3
Positive Regulation Of NIK/NF-kappaB Signaling (GO:1901224)	560	0.269371	0.402629	0	0	3.30487	4.33488	PYCARD
Positive Regulation Of Protein Localization To Cell Periphery (GO:1904377)	561	0.269371	0.402629	0	0	3.30487	4.33488	CNPY4
Positive Regulation Of Protein Localization To Plasma Membrane (GO:1903078)	562	0.269371	0.402629	0	0	3.30487	4.33488	CNPY4
Protein Localization To Lysosome (GO:0061462)	563	0.269371	0.402629	0	0	3.30487	4.33488	SZT2
Protein Transmembrane Import Into Intracellular Organelle (GO:0044743)	564	0.269371	0.402629	0	0	3.30487	4.33488	HSPD1
Regulation Of Apoptotic Signaling Pathway (GO:2001233)	565	0.269371	0.402629	0	0	3.30487	4.33488	PYCARD
Negative Regulation Of Cysteine-Type Endopeptidase Activity Involved In Apoptotic Process (GO:0043154)	566	0.269371	0.402629	0	0	3.30487	4.33488	RAF1
Cytosolic Transport (GO:0016482)	567	0.271081	0.40447	0	0	2.00236	2.61376	VPS54;STX10
Double-Strand Break Repair Via Homologous Recombination (GO:0000724)	568	0.274941	0.408241	0	0	1.98152	2.55853	RAD21;SAMHD1
Regulation Of Cellular Component Organization (GO:0051128)	569	0.274941	0.408241	0	0	1.98152	2.55853	CAMK2D;CISH
DNA Metabolic Process (GO:0006259)	570	0.275848	0.408241	0	0	1.53114	1.97196	DDB1;RAD21;NUDT1;SAMHD1
Regulation Of Interleukin-1 Beta Production (GO:0032651)	571	0.276986	0.408241	0	0	3.19439	4.10092	PYCARD
Positive Regulation Of Chromosome Organization (GO:2001252)	572	0.276986	0.408241	0	0	3.19439	4.10092	RAD21
Negative Regulation Of I-kappaB kinase/NF-kappaB Signaling (GO:0043124)	573	0.276986	0.408241	0	0	3.19439	4.10092	PYCARD
Negative Regulation Of Cellular Response To Growth Factor Stimulus (GO:0090288)	574	0.276986	0.408241	0	0	3.19439	4.10092	PDCD6
Regulation Of Mitotic Cell Cycle (GO:0007346)	575	0.28266	0.415011	0	0	1.94111	2.45261	DDB1;BTG1
Protein Phosphorylation (GO:0006468)	576	0.282904	0.415011	0	0	1.43283	1.80916	SMAD2;CAMK2D;PRKAR1B;TXK;PKN1
Phagocytosis (GO:0006909)	577	0.284523	0.415011	0	0	3.09105	3.88527	ADORA2A
Cellular Response To Mechanical Stimulus (GO:0071260)	578	0.284523	0.415011	0	0	3.09105	3.88527	CNN2
Positive Regulation Of T Cell Proliferation (GO:0042102)	579	0.284523	0.415011	0	0	3.09105	3.88527	PYCARD
Positive Regulation Of Telomere Maintenance Via Telomere Lengthening (GO:1904358)	580	0.284523	0.415011	0	0	3.09105	3.88527	HNRNPA1
Positive Regulation Of MAPK Cascade (GO:0043410)	581	0.290373	0.420095	0	0	1.9023	2.35236	PYCARD;RAF1
Regulation Of miRNA Transcription (GO:1902893)	582	0.291981	0.420095	0	0	2.99416	3.68601	JUN
Regulation Of Myoblast Differentiation (GO:0045661)	583	0.291981	0.420095	0	0	2.99416	3.68601	BTG1
Regulation Of Neurogenesis (GO:0050767)	584	0.291981	0.420095	0	0	2.99416	3.68601	RGS14
Response To Interleukin-1 (GO:0070555)	585	0.291981	0.420095	0	0	2.99416	3.68601	PYCARD
Response To Unfolded Protein (GO:0006986)	586	0.291981	0.420095	0	0	2.99416	3.68601	HSPD1
Positive Regulation Of Endocytosis (GO:0045807)	587	0.291981	0.420095	0	0	2.99416	3.68601	PYCARD
Regulation Of BMP Signaling Pathway (GO:0030510)	588	0.291981	0.420095	0	0	2.99416	3.68601	SMAD2
Regulation Of Inflammatory Response (GO:0050727)	589	0.298076	0.423513	0	0	1.86499	2.2574	PYCARD;IL10RA
COPII-coated Vesicle Budding (GO:0090114)	590	0.299363	0.423513	0	0	2.90314	3.50148	PDCD6
Regulation Of Interferon-Beta Production (GO:0032648)	591	0.299363	0.423513	0	0	2.90314	3.50148	PYCARD
Actin Polymerization Or Depolymerization (GO:0008154)	592	0.299363	0.423513	0	0	2.90314	3.50148	TWF2
Negative Regulation Of Response To Biotic Stimulus (GO:0002832)	593	0.299363	0.423513	0	0	2.90314	3.50148	SIGIRR
Calcium-Mediated Signaling (GO:0019722)	594	0.299363	0.423513	0	0	2.90314	3.50148	PPP3CC
Regulation Of Tumor Necrosis Factor-Mediated Signaling Pathway (GO:0010803)	595	0.299363	0.423513	0	0	2.90314	3.50148	PYCARD
Positive Regulation Of Neurogenesis (GO:0050769)	596	0.299363	0.423513	0	0	2.90314	3.50148	RGS14
Positive Regulation Of Viral Process (GO:0048524)	597	0.299363	0.423513	0	0	2.90314	3.50148	DDB1
Maturation Of SSU-rRNA (GO:0030490)	598	0.299363	0.423513	0	0	2.90314	3.50148	RPS8
B Cell Differentiation (GO:0030183)	599	0.306668	0.426713	0	0	2.81748	3.33023	SYVN1
Regulation Of Immune Response (GO:0050776)	600	0.306668	0.426713	0	0	2.81748	3.33023	SAMHD1
Regulation Of Interleukin-8 Production (GO:0032677)	601	0.306668	0.426713	0	0	2.81748	3.33023	PYCARD
Regulation Of Proteolysis (GO:0030162)	602	0.306668	0.426713	0	0	2.81748	3.33023	SERPINE2
Regulation Of Stress-Activated MAPK Cascade (GO:0032872)	603	0.306668	0.426713	0	0	2.81748	3.33023	MAPK8IP3
Cellular Response To Interleukin-1 (GO:0071347)	604	0.306668	0.426713	0	0	2.81748	3.33023	PYCARD
Response To Amino Acid Starvation (GO:1990928)	605	0.306668	0.426713	0	0	2.81748	3.33023	SZT2
Positive Regulation Of Lymphocyte Proliferation (GO:0050671)	606	0.306668	0.426713	0	0	2.81748	3.33023	CD320
Positive Regulation Of Neuron Projection Development (GO:0010976)	607	0.306668	0.426713	0	0	2.81748	3.33023	TWF2
Regulation Of DNA Binding (GO:0051101)	608	0.306668	0.426713	0	0	2.81748	3.33023	JUN
Proteasomal Protein Catabolic Process (GO:0010498)	609	0.307756	0.427523	0	0	1.56832	1.84819	DDB1;PSMB2;SYVN1
Proteasome-Mediated Ubiquitin-Dependent Protein Catabolic Process (GO:0043161)	610	0.30855	0.427924	0	0	1.44853	1.70328	DDB1;PSMB2;SYVN1;TMUB1
Protein Autophosphorylation (GO:0046777)	611	0.313444	0.4311	0	0	1.79457	2.08194	CAMK2D;TXK
Nuclear Transport (GO:0051169)	612	0.313898	0.4311	0	0	2.73672	3.171	RGS14
Nucleobase-Containing Compound Catabolic Process (GO:0034655)	613	0.313898	0.4311	0	0	2.73672	3.171	RNASET2
Cellular Response To Amino Acid Starvation (GO:0034198)	614	0.313898	0.4311	0	0	2.73672	3.171	SZT2
Vacuolar Transport (GO:0007034)	615	0.313898	0.4311	0	0	2.73672	3.171	VPS54
Regulation Of G Protein-Coupled Receptor Signaling Pathway (GO:0008277)	616	0.313898	0.4311	0	0	2.73672	3.171	RGS14
Endocytosis (GO:0006897)	617	0.317275	0.435032	0	0	1.77778	2.04086	ADORA2A;IL10RA
Regulation Of Intrinsic Apoptotic Signaling Pathway (GO:2001242)	618	0.321053	0.43879	0	0	2.66044	3.02265	PYCARD
Protein Localization To Chromosome (GO:0034502)	619	0.321053	0.43879	0	0	2.66044	3.02265	RAD21
Regulation Of Apoptotic Process (GO:0042981)	620	0.327731	0.444163	0	0	1.30059	1.45089	PYCARD;SOCS3;JUN;RAF1;MAPK8IP3;HSPD1
Autophagosome Maturation (GO:0097352)	621	0.328134	0.444163	0	0	2.58828	2.8842	VAMP8
Response To Metal Ion (GO:0010038)	622	0.328134	0.444163	0	0	2.58828	2.8842	PDCD6
Positive Regulation Of Transmembrane Receptor Protein Serine/Threonine Kinase Signaling Pathway (GO:0090100)	623	0.328134	0.444163	0	0	2.58828	2.8842	SMAD2
Positive Regulation Of Tumor Necrosis Factor Production (GO:0032760)	624	0.328134	0.444163	0	0	2.58828	2.8842	PYCARD
Regulation Of Alternative mRNA Splicing, Via Spliceosome (GO:0000381)	625	0.328134	0.444163	0	0	2.58828	2.8842	HNRNPA1
Negative Regulation Of Apoptotic Process (GO:0043066)	626	0.334533	0.450048	0	0	1.38948	1.5215	SOCS3;RAF1;MAPK8IP3;HSPD1
Regulation Of Cyclin-Dependent Protein Kinase Activity (GO:1904029)	627	0.335142	0.450048	0	0	2.51992	2.75478	CNPPD1
Negative Regulation Of Protein-Containing Complex Assembly (GO:0031333)	628	0.335142	0.450048	0	0	2.51992	2.75478	RAF1
Positive Regulation Of Tumor Necrosis Factor Superfamily Cytokine Production (GO:1903557)	629	0.335142	0.450048	0	0	2.51992	2.75478	PYCARD
Monoatomic Cation Homeostasis (GO:0055080)	630	0.335142	0.450048	0	0	2.51992	2.75478	SLC12A9
Regulation Of Cell Differentiation (GO:0045595)	631	0.336357	0.450964	0	0	1.69828	1.85042	MCRIP1;RAF1
Nuclear Export (GO:0051168)	632	0.342078	0.454314	0	0	2.45507	2.63359	HNRNPA1
Positive Regulation Of Cell-Substrate Adhesion (GO:0010811)	633	0.342078	0.454314	0	0	2.45507	2.63359	SKAP1
Positive Regulation Of Protein Polymerization (GO:0032273)	634	0.342078	0.454314	0	0	2.45507	2.63359	PYCARD
Protein Tetramerization (GO:0051262)	635	0.342078	0.454314	0	0	2.45507	2.63359	SAMHD1
Regulation Of TORC1 Signaling (GO:1903432)	636	0.342078	0.454314	0	0	2.45507	2.63359	SZT2
Regulation Of Cell-Matrix Adhesion (GO:0001952)	637	0.342078	0.454314	0	0	2.45507	2.63359	SKAP1
DNA Recombination (GO:0006310)	638	0.348942	0.458393	0	0	2.39346	2.51995	RAD21
Negative Regulation Of Supramolecular Fiber Organization (GO:1902904)	639	0.348942	0.458393	0	0	2.39346	2.51995	TWF2
Cellular Response To Hormone Stimulus (GO:0032870)	640	0.348942	0.458393	0	0	2.39346	2.51995	ATP1A1
Establishment Of Protein Localization To Mitochondrion (GO:0072655)	641	0.348942	0.458393	0	0	2.39346	2.51995	HSPD1
Positive Regulation Of Mitochondrion Organization (GO:0010822)	642	0.348942	0.458393	0	0	2.39346	2.51995	PYCARD
Regulation Of Rho Protein Signal Transduction (GO:0035023)	643	0.348942	0.458393	0	0	2.39346	2.51995	RAF1
Negative Regulation Of Cellular Component Organization (GO:0051129)	644	0.348942	0.458393	0	0	2.39346	2.51995	RAF1
Negative Regulation Of Innate Immune Response (GO:0045824)	645	0.355735	0.463716	0	0	2.33485	2.41323	SAMHD1
Regulation Of Endothelial Cell Migration (GO:0010594)	646	0.355735	0.463716	0	0	2.33485	2.41323	PDCD6
Epithelial Cell Differentiation (GO:0030855)	647	0.355735	0.463716	0	0	2.33485	2.41323	GSTK1
Intracellular Protein Transmembrane Transport (GO:0065002)	648	0.355735	0.463716	0	0	2.33485	2.41323	HSPD1
Negative Regulation Of Autophagy (GO:0010507)	649	0.355735	0.463716	0	0	2.33485	2.41323	IL10RA
Defense Response To Virus (GO:0051607)	650	0.359048	0.467314	0	0	1.6117	1.65087	PYCARD;SAMHD1
Positive Regulation Of Cytoskeleton Organization (GO:0051495)	651	0.362458	0.469585	0	0	2.27904	2.31288	PYCARD
Positive Regulation Of Peptidyl-Serine Phosphorylation (GO:0033138)	652	0.362458	0.469585	0	0	2.27904	2.31288	RAF1
Integrin-Mediated Signaling Pathway (GO:0007229)	653	0.362458	0.469585	0	0	2.27904	2.31288	TXK
Negative Regulation Of Intrinsic Apoptotic Signaling Pathway (GO:2001243)	654	0.369111	0.473133	0	0	2.22582	2.21838	SYVN1
Axon Development (GO:0061564)	655	0.369111	0.473133	0	0	2.22582	2.21838	MAPK8IP3
Regulation Of Telomere Maintenance Via Telomerase (GO:0032210)	656	0.369111	0.473133	0	0	2.22582	2.21838	HNRNPA1
Replication Fork Processing (GO:0031297)	657	0.369111	0.473133	0	0	2.22582	2.21838	SAMHD1
tRNA Processing (GO:0008033)	658	0.369111	0.473133	0	0	2.22582	2.21838	POP7
Glycoprotein Biosynthetic Process (GO:0009101)	659	0.369111	0.473133	0	0	2.22582	2.21838	PDCD6
Negative Regulation Of Cellular Catabolic Process (GO:0031330)	660	0.369111	0.473133	0	0	2.22582	2.21838	IL10RA
RNA Catabolic Process (GO:0006401)	661	0.375695	0.477235	0	0	2.17502	2.12929	RNASET2
Nucleotide-Excision Repair (GO:0006289)	662	0.375695	0.477235	0	0	2.17502	2.12929	DDB1
Response To Reactive Oxygen Species (GO:0000302)	663	0.375695	0.477235	0	0	2.17502	2.12929	JUN
Ribosome Assembly (GO:0042255)	664	0.375695	0.477235	0	0	2.17502	2.12929	ERAL1
Regulation Of MAP Kinase Activity (GO:0043405)	665	0.375695	0.477235	0	0	2.17502	2.12929	RGS14
Negative Regulation Of Cell Death (GO:0060548)	666	0.375695	0.477235	0	0	2.17502	2.12929	AMIGO2
Organonitrogen Compound Catabolic Process (GO:1901565)	667	0.382212	0.482614	0	0	2.12648	2.04521	UCHL3
Peptidyl-Threonine Phosphorylation (GO:0018107)	668	0.382212	0.482614	0	0	2.12648	2.04521	CAMK2D
Cellular Response To Light Stimulus (GO:0071482)	669	0.382212	0.482614	0	0	2.12648	2.04521	DDB1
Positive Regulation Of Type I Interferon Production (GO:0032481)	670	0.382212	0.482614	0	0	2.12648	2.04521	HSPD1
Regulation Of Cell Population Proliferation (GO:0042127)	671	0.38381	0.483784	0	0	1.24478	1.19201	CDC123;JUN;BTG1;ASH2L;RAF1
Regulation Of Programmed Cell Death (GO:0043067)	672	0.385162	0.483784	0	0	1.52111	1.45128	AMIGO2;RAF1
B Cell Activation (GO:0042113)	673	0.388661	0.483784	0	0	2.08005	1.96575	HSPD1
Regulation Of Stress Fiber Assembly (GO:0051492)	674	0.388661	0.483784	0	0	2.08005	1.96575	WASF2
Positive Regulation Of DNA-templated Transcription Initiation (GO:2000144)	675	0.388661	0.483784	0	0	2.08005	1.96575	JUN
Positive Regulation Of Endothelial Cell Migration (GO:0010595)	676	0.388661	0.483784	0	0	2.08005	1.96575	PDCD6
Extrinsic Apoptotic Signaling Pathway (GO:0097191)	677	0.388661	0.483784	0	0	2.08005	1.96575	TNFSF12
Positive Regulation Of Protein Localization To Membrane (GO:1905477)	678	0.388661	0.483784	0	0	2.08005	1.96575	CNPY4
Peptidyl-Serine Modification (GO:0018209)	679	0.388857	0.483784	0	0	1.50899	1.42531	CAMK2D;PKN1
Positive Regulation Of Cell Differentiation (GO:0045597)	680	0.388857	0.483784	0	0	1.50899	1.42531	SMAD2;BTG1
Peptide Biosynthetic Process (GO:0043043)	681	0.392542	0.486936	0	0	1.49705	1.39991	RPS8;FAU
Peptidyl-Serine Phosphorylation (GO:0018105)	682	0.392542	0.486936	0	0	1.49705	1.39991	CAMK2D;PKN1
Organelle Disassembly (GO:1903008)	683	0.395043	0.489321	0	0	2.03559	1.89058	PNPLA2
post-Golgi Vesicle-Mediated Transport (GO:0006892)	684	0.401359	0.495693	0	0	1.99299	1.8194	VPS54
Regulation Of NIK/NF-kappaB Signaling (GO:1901222)	685	0.401359	0.495693	0	0	1.99299	1.8194	PYCARD
Endosomal Transport (GO:0016197)	686	0.407183	0.497602	0	0	1.45111	1.30382	VPS54;STX10
Regulation Of Plasma Membrane Bounded Cell Projection Assembly (GO:0120032)	687	0.40761	0.497602	0	0	1.95213	1.75192	TWF2
Peptidyl-Threonine Modification (GO:0018210)	688	0.40761	0.497602	0	0	1.95213	1.75192	CAMK2D
Regulation Of Viral Genome Replication (GO:0045069)	689	0.40761	0.497602	0	0	1.95213	1.75192	DDB1
Positive Regulation Of Cell Projection Organization (GO:0031346)	690	0.40761	0.497602	0	0	1.95213	1.75192	TWF2
Protein N-linked Glycosylation (GO:0006487)	691	0.40761	0.497602	0	0	1.95213	1.75192	PDCD6
Regulation Of Ras Protein Signal Transduction (GO:0046578)	692	0.40761	0.497602	0	0	1.95213	1.75192	RAF1
Regulation Of Actin Cytoskeleton Organization (GO:0032956)	693	0.40761	0.497602	0	0	1.95213	1.75192	TWF2
Regulation Of Defense Response (GO:0031347)	694	0.413796	0.501535	0	0	1.9129	1.6879	SAMHD1
Cellular Response To Reactive Oxygen Species (GO:0034614)	695	0.413796	0.501535	0	0	1.9129	1.6879	JUN
Epithelium Development (GO:0060429)	696	0.413796	0.501535	0	0	1.9129	1.6879	GSTK1
Positive Regulation Of Supramolecular Fiber Organization (GO:1902905)	697	0.413796	0.501535	0	0	1.9129	1.6879	PYCARD
Negative Regulation Of NF-kappaB Transcription Factor Activity (GO:0032088)	698	0.413796	0.501535	0	0	1.9129	1.6879	PYCARD
Regulation Of Wnt Signaling Pathway (GO:0030111)	699	0.419919	0.507502	0	0	1.87521	1.62711	TRABD2A
Negative Regulation Of Cell Cycle (GO:0045786)	700	0.419919	0.507502	0	0	1.87521	1.62711	BTG1
Supramolecular Fiber Organization (GO:0097435)	701	0.421656	0.508149	0	0	1.40788	1.2158	CNN2;HNRNPA1
Positive Regulation Of Protein Metabolic Process (GO:0051247)	702	0.421656	0.508149	0	0	1.40788	1.2158	DDB1;TNFSF12
Negative Regulation Of Intracellular Signal Transduction (GO:1902532)	703	0.425246	0.509727	0	0	1.39747	1.19496	PYCARD;PDCD6
Negative Regulation Of Inflammatory Response (GO:0050728)	704	0.425977	0.509727	0	0	1.83896	1.56932	IL10RA
Cellular Response To Molecule Of Bacterial Origin (GO:0071219)	705	0.425977	0.509727	0	0	1.83896	1.56932	PYCARD
Positive Regulation Of DNA Biosynthetic Process (GO:2000573)	706	0.425977	0.509727	0	0	1.83896	1.56932	HNRNPA1
Protein-Containing Complex Disassembly (GO:0032984)	707	0.425977	0.509727	0	0	1.83896	1.56932	VAMP8
Positive Regulation Of ERK1 And ERK2 Cascade (GO:0070374)	708	0.431974	0.513994	0	0	1.80409	1.51434	PYCARD
Response To Tumor Necrosis Factor (GO:0034612)	709	0.431974	0.513994	0	0	1.80409	1.51434	PYCARD
Positive Regulation Of Epithelial Cell Migration (GO:0010634)	710	0.431974	0.513994	0	0	1.80409	1.51434	PDCD6
Negative Regulation Of MAPK Cascade (GO:0043409)	711	0.431974	0.513994	0	0	1.80409	1.51434	RGS14
Regulation Of Peptidyl-Serine Phosphorylation (GO:0033135)	712	0.437908	0.519593	0	0	1.77051	1.46199	RAF1
Positive Regulation Of Cellular Component Biogenesis (GO:0044089)	713	0.437908	0.519593	0	0	1.77051	1.46199	TRABD2A
RNA Export From Nucleus (GO:0006405)	714	0.44378	0.525088	0	0	1.73815	1.41212	HNRNPA1
Negative Regulation Of Protein Kinase Activity (GO:0006469)	715	0.44378	0.525088	0	0	1.73815	1.41212	PYCARD
Regulation Of Translational Initiation (GO:0006446)	716	0.449592	0.529006	0	0	1.70694	1.36455	CDC123
Regulation Of Tumor Necrosis Factor Production (GO:0032680)	717	0.449592	0.529006	0	0	1.70694	1.36455	PYCARD
Regulation Of DNA Replication (GO:0006275)	718	0.449592	0.529006	0	0	1.70694	1.36455	ZBTB38
Regulation Of TOR Signaling (GO:0032006)	719	0.449592	0.529006	0	0	1.70694	1.36455	PDCD6
Regulation Of Cyclin-Dependent Protein Serine/Threonine Kinase Activity (GO:0000079)	720	0.455344	0.533547	0	0	1.67683	1.31917	CNPPD1
Positive Regulation Of Cellular Component Organization (GO:0051130)	721	0.455344	0.533547	0	0	1.67683	1.31917	TRABD2A
Hemopoiesis (GO:0030097)	722	0.455344	0.533547	0	0	1.67683	1.31917	ASH2L
Positive Regulation Of Cell Growth (GO:0030307)	723	0.461036	0.538725	0	0	1.64776	1.27583	TWF2
Positive Regulation Of Defense Response (GO:0031349)	724	0.461036	0.538725	0	0	1.64776	1.27583	PYCARD
Macromolecule Biosynthetic Process (GO:0009059)	725	0.46396	0.540825	0	0	1.2922	0.992353	RPS8;FAU
Cellular Response To UV (GO:0034644)	726	0.466669	0.540825	0	0	1.61967	1.23441	DDB1
Cellular Response To Lipopolysaccharide (GO:0071222)	727	0.466669	0.540825	0	0	1.61967	1.23441	PYCARD
Cellular Response To Tumor Necrosis Factor (GO:0071356)	728	0.466669	0.540825	0	0	1.61967	1.23441	PYCARD
Protein K48-linked Ubiquitination (GO:0070936)	729	0.466669	0.540825	0	0	1.61967	1.23441	SYVN1
Negative Regulation Of Binding (GO:0051100)	730	0.466669	0.540825	0	0	1.61967	1.23441	JUN
Double-Strand Break Repair (GO:0006302)	731	0.467405	0.540936	0	0	1.2834	0.976102	RAD21;SAMHD1
Regulation Of Innate Immune Response (GO:0045088)	732	0.472244	0.544303	0	0	1.59252	1.1948	SAMHD1
Cytoskeleton Organization (GO:0007010)	733	0.472244	0.544303	0	0	1.59252	1.1948	CNN2
Epigenetic Regulation Of Gene Expression (GO:0040029)	734	0.472244	0.544303	0	0	1.59252	1.1948	ASH2L
Protein Localization (GO:0008104)	735	0.475698	0.547538	0	0	1.17564	0.873471	PDCD6;TMED3;STX10
Transcription By RNA Polymerase II (GO:0006366)	736	0.481054	0.55295	0	0	1.24935	0.914246	DRAP1;PMF1
Import Into Nucleus (GO:0051170)	737	0.483221	0.553937	0	0	1.54085	1.12063	HNRNPA1
Proteolysis Involved In Protein Catabolic Process (GO:0051603)	738	0.483221	0.553937	0	0	1.54085	1.12063	DDB1
Gene Expression (GO:0010467)	739	0.486351	0.556769	0	0	1.15622	0.833434	RPS8;FAU;HSPD1
Regulation Of Cytoskeleton Organization (GO:0051493)	740	0.488625	0.557111	0	0	1.51624	1.08587	TWF2
Regulation Of Response To External Stimulus (GO:0032101)	741	0.488625	0.557111	0	0	1.51624	1.08587	SAMHD1
Negative Regulation Of Defense Response (GO:0031348)	742	0.488625	0.557111	0	0	1.51624	1.08587	IL10RA
Positive Regulation Of Response To External Stimulus (GO:0032103)	743	0.499264	0.568005	0	0	1.4693	1.02061	PYCARD
DNA Repair (GO:0006281)	744	0.499523	0.568005	0	0	1.13281	0.786284	DDB1;RAD21;NUDT1
Modification-Dependent Protein Catabolic Process (GO:0019941)	745	0.504424	0.572129	0	0	1.19387	0.81701	DDB1;SYVN1
Regulation Of Cell Adhesion (GO:0030155)	746	0.504501	0.572129	0	0	1.4469	0.989946	CYTIP
Regulation Of Mitotic Cell Cycle Phase Transition (GO:1901990)	747	0.509684	0.574924	0	0	1.42516	0.960509	DDB1
Regulation Of Protein Kinase B Signaling (GO:0051896)	748	0.509684	0.574924	0	0	1.42516	0.960509	PDCD6
Positive Regulation Of Protein Ubiquitination (GO:0031398)	749	0.509684	0.574924	0	0	1.42516	0.960509	PDCD6
Protein Complex Oligomerization (GO:0051259)	750	0.509684	0.574924	0	0	1.42516	0.960509	PYCARD
Intracellular Protein Transport (GO:0006886)	751	0.512526	0.57736	0	0	1.1103	0.742128	PDCD6;TMED3;STX10
Establishment Of Protein Localization To Organelle (GO:0072594)	752	0.51989	0.584099	0	0	1.38358	0.905056	IL10RA
Negative Regulation Of Wnt Signaling Pathway (GO:0030178)	753	0.51989	0.584099	0	0	1.38358	0.905056	TRABD2A
Actin Filament Organization (GO:0007015)	754	0.524913	0.588961	0	0	1.36368	0.878926	CNN2
Protein Modification By Small Protein Conjugation (GO:0032446)	755	0.527898	0.591525	0	0	1.08442	0.692782	DDB1;SYVN1;UCHL3
Regulation Of Transforming Growth Factor Beta Receptor Signaling Pathway (GO:0017015)	756	0.529884	0.592183	0	0	1.34435	0.85379	SMAD2
Cellular Response To Organic Cyclic Compound (GO:0071407)	757	0.529884	0.592183	0	0	1.34435	0.85379	ATP1A1
Regulation Of mRNA Splicing, Via Spliceosome (GO:0048024)	758	0.534804	0.596106	0	0	1.32555	0.829598	HNRNPA1
Regulation Of RNA Metabolic Process (GO:0051252)	759	0.534804	0.596106	0	0	1.32555	0.829598	HNRNPA1
Inflammatory Response (GO:0006954)	760	0.544491	0.605308	0	0	1.28947	0.783871	ADORA2A
Protein Deubiquitination (GO:0016579)	761	0.544491	0.605308	0	0	1.28947	0.783871	UCHL3
Negative Regulation Of Growth (GO:0045926)	762	0.54926	0.609009	0	0	1.27215	0.762252	BTG1
Organic Substance Transport (GO:0071702)	763	0.54926	0.609009	0	0	1.27215	0.762252	CD320
Nitrogen Compound Transport (GO:0071705)	764	0.553979	0.612635	0	0	1.25529	0.74141	CD320
Negative Regulation Of Cell Growth (GO:0030308)	765	0.553979	0.612635	0	0	1.25529	0.74141	BTG1
Vesicle-Mediated Transport (GO:0016192)	766	0.555381	0.613385	0	0	1.0399	0.611563	VAMP8;MAPK8IP3;STX10
Glycerophospholipid Biosynthetic Process (GO:0046474)	767	0.558648	0.615386	0	0	1.23886	0.72131	DGKA
Protein Modification By Small Protein Removal (GO:0070646)	768	0.558648	0.615386	0	0	1.23886	0.72131	UCHL3
Lysosomal Transport (GO:0007041)	769	0.56327	0.618467	0	0	1.22286	0.701918	VPS54
Protein Maturation (GO:0051604)	770	0.56327	0.618467	0	0	1.22286	0.701918	HSPD1
Nervous System Development (GO:0007399)	771	0.564369	0.618467	0	0	1.06514	0.60931	SZT2;ADORA2A
Positive Regulation Of Multicellular Organismal Process (GO:0051240)	772	0.564369	0.618467	0	0	1.06514	0.60931	SMAD2;TXK
Brain Development (GO:0007420)	773	0.567843	0.619865	0	0	1.20726	0.683202	AMIGO2
Response To Lipopolysaccharide (GO:0032496)	774	0.567843	0.619865	0	0	1.20726	0.683202	PYCARD
Intrinsic Apoptotic Signaling Pathway (GO:0097193)	775	0.567843	0.619865	0	0	1.20726	0.683202	PYCARD
Response To UV (GO:0009411)	776	0.572369	0.624001	0	0	1.19206	0.665132	DDB1
Regulation Of Intracellular Signal Transduction (GO:1902531)	777	0.576318	0.625659	0	0	1.04145	0.573937	PYCARD;AKAP7
Regulation Of Cytokine Production (GO:0001817)	778	0.576849	0.625659	0	0	1.17722	0.64768	TXK
Cellular Response To Oxidative Stress (GO:0034599)	779	0.576849	0.625659	0	0	1.17722	0.64768	JUN
Positive Regulation Of Cell Cycle Process (GO:0090068)	780	0.576849	0.625659	0	0	1.17722	0.64768	RAD21
Recombinational Repair (GO:0000725)	781	0.585668	0.6336	0	0	1.14863	0.614521	SAMHD1
Regulation Of RNA Splicing (GO:0043484)	782	0.585668	0.6336	0	0	1.14863	0.614521	HNRNPA1
Regulation Of Macromolecule Metabolic Process (GO:0060255)	783	0.590009	0.637481	0	0	1.13485	0.598765	TXK
Negative Regulation Of Nucleic Acid-Templated Transcription (GO:1903507)	784	0.591311	0.638073	0	0	0.984631	0.517338	SMAD2;JUN;ZBTB38
Negative Regulation Of Cell Population Proliferation (GO:0008285)	785	0.593796	0.639938	0	0	1.00779	0.525278	BTG1;RAF1
Cellular Response To Growth Factor Stimulus (GO:0071363)	786	0.598556	0.643429	0	0	1.10824	0.568786	TWF2
Macroautophagy (GO:0016236)	787	0.598556	0.643429	0	0	1.10824	0.568786	VAMP8
Positive Regulation Of NF-kappaB Transcription Factor Activity (GO:0051092)	788	0.602764	0.645491	0	0	1.09539	0.55452	PYCARD
Protein Dephosphorylation (GO:0006470)	789	0.602764	0.645491	0	0	1.09539	0.55452	PPP3CC
Protein Glycosylation (GO:0006486)	790	0.602764	0.645491	0	0	1.09539	0.55452	PDCD6
Intracellular Monoatomic Cation Homeostasis (GO:0030003)	791	0.606927	0.648854	0	0	1.08284	0.540711	ATP1A1
Negative Regulation Of Cellular Process (GO:0048523)	792	0.607438	0.648854	0	0	0.96075	0.478939	VAMP8;BTG1;RAF1
Inorganic Cation Transmembrane Transport (GO:0098662)	793	0.611047	0.650247	0	0	1.07057	0.52734	ATP1A1
Monoatomic Cation Transmembrane Transport (GO:0098655)	794	0.611047	0.650247	0	0	1.07057	0.52734	ATP1A1
ncRNA Processing (GO:0034470)	795	0.611047	0.650247	0	0	1.07057	0.52734	POP7
Translation (GO:0006412)	796	0.619007	0.656403	0	0	0.961121	0.460991	RPS8;FAU
RNA Metabolic Process (GO:0016070)	797	0.61916	0.656403	0	0	1.04683	0.501842	RNASET2
Regulation Of MAPK Cascade (GO:0043408)	798	0.61916	0.656403	0	0	1.04683	0.501842	RAF1
Ubiquitin-Dependent Protein Catabolic Process (GO:0006511)	799	0.623144	0.6598	0	0	0.93797	0.443638	DDB1;PSMB2;SYVN1
Negative Regulation Of Protein Metabolic Process (GO:0051248)	800	0.627105	0.663164	0	0	1.02412	0.477896	SERPINE2
Neuron Projection Development (GO:0031175)	801	0.631016	0.665635	0	0	1.01312	0.466467	MAPK8IP3
Dephosphorylation (GO:0016311)	802	0.631016	0.665635	0	0	1.01312	0.466467	PPP3CC
Negative Regulation Of DNA-templated Transcription (GO:0045892)	803	0.63662	0.67071	0	0	0.920046	0.415476	DRAP1;SMAD2;MAGEH1;JUN;ZBTB38;MAGED2
Golgi Organization (GO:0007030)	804	0.642506	0.67607	0	0	0.981501	0.434196	TMED3
Protein Ubiquitination (GO:0016567)	805	0.649076	0.681379	0	0	0.901266	0.389532	DDB1;SYVN1;UCHL3
Cytokine-Mediated Signaling Pathway (GO:0019221)	806	0.649968	0.681379	0	0	0.961484	0.414238	PYCARD
Positive Regulation Of Cellular Catabolic Process (GO:0031331)	807	0.649968	0.681379	0	0	0.961484	0.414238	PNPLA2
Positive Regulation Of Cellular Biosynthetic Process (GO:0031328)	808	0.660873	0.691954	0	0	0.93293	0.386413	DDB1
Regulation Of Transcription By RNA Polymerase II (GO:0006357)	809	0.664409	0.694796	0	0	0.907812	0.371166	DRAP1;SMAD2;MAGEH1;CAMK2D;JUN;RAD21;TXK;ZBTB38;MAGED2;PKN1;SKAP1
Regulation Of Cell Cycle (GO:0051726)	810	0.670735	0.700546	0	0	0.871213	0.347946	CDC123;JUN
Ribonucleoprotein Complex Biogenesis (GO:0022613)	811	0.681684	0.711103	0	0	0.880582	0.33743	RPS8
Positive Regulation Of Cell Population Proliferation (GO:0008284)	812	0.687464	0.71625	0	0	0.843522	0.316106	CDC123;ASH2L
Regulation Of DNA Metabolic Process (GO:0051052)	813	0.691609	0.719682	0	0	0.856529	0.315832	ZBTB38
Regulation Of Signal Transduction (GO:0009966)	814	0.704368	0.732058	0	0	0.826412	0.28962	RGS14
Positive Regulation Of Transcription By RNA Polymerase II (GO:0045944)	815	0.707558	0.734471	0	0	0.841337	0.291049	SMAD2;JUN;TXK;ZBTB38;SKAP1
Negative Regulation Of Transcription By RNA Polymerase II (GO:0000122)	816	0.708761	0.734818	0	0	0.830854	0.286011	DRAP1;MAGEH1;JUN;MAGED2
Transmembrane Receptor Protein Tyrosine Kinase Signaling Pathway (GO:0007169)	817	0.725449	0.7512	0	0	0.778459	0.249857	RGS14
Mitochondrion Organization (GO:0007005)	818	0.728337	0.753267	0	0	0.772054	0.244735	HSPD1
Positive Regulation Of Nucleic Acid-Templated Transcription (GO:1903508)	819	0.734999	0.758903	0	0	0.785358	0.241801	SMAD2;JUN;SKAP1
Positive Regulation Of Gene Expression (GO:0010628)	820	0.73558	0.758903	0	0	0.76671	0.235454	TXK;ASH2L
Positive Regulation Of Protein Modification Process (GO:0031401)	821	0.73682	0.759256	0	0	0.753449	0.230112	TRABD2A
protein-RNA Complex Assembly (GO:0022618)	822	0.742329	0.764003	0	0	0.74153	0.220949	ERAL1
Positive Regulation Of DNA-binding Transcription Factor Activity (GO:0051091)	823	0.763245	0.784576	0	0	0.697361	0.18841	PYCARD
Ribosome Biogenesis (GO:0042254)	824	0.775455	0.796159	0	0	0.672301	0.17097	RPS8
Endomembrane System Organization (GO:0010256)	825	0.777821	0.79762	0	0	0.6675	0.167716	TMED3
Proteolysis (GO:0006508)	826	0.780162	0.799052	0	0	0.662767	0.164535	TRABD2A
Cellular Response To Cytokine Stimulus (GO:0071345)	827	0.784771	0.802801	0	0	0.653497	0.158383	PYCARD
Cilium Organization (GO:0044782)	828	0.793705	0.810959	0	0	0.635702	0.146875	CCDC66
Cilium Assembly (GO:0060271)	829	0.798033	0.814398	0	0	0.627159	0.141491	CCDC66
Positive Regulation Of Intracellular Signal Transduction (GO:1902533)	830	0.800799	0.816236	0	0	0.666778	0.148121	PYCARD;RAF1
Organelle Organization (GO:0006996)	831	0.805541	0.820081	0	0	0.659586	0.14263	CNN2;TMED3
Regulation Of Nucleic Acid-Templated Transcription (GO:1903506)	832	0.814727	0.828437	0	0	0.645645	0.132294	BTG1;ZBTB38
RNA Splicing, Via Transesterification Reactions With Bulged Adenosine As Nucleophile (GO:0000377)	833	0.816421	0.829162	0	0	0.591355	0.119942	HNRNPA1
Positive Regulation Of Cellular Process (GO:0048522)	834	0.823529	0.835378	0	0	0.632265	0.122759	CDC123;ASH2L
Regulation Of I-kappaB kinase/NF-kappaB Signaling (GO:0043122)	835	0.82591	0.83679	0	0	0.573152	0.109627	PYCARD
Regulation Of DNA-templated Transcription (GO:0006355)	836	0.845433	0.855546	0	0	0.741601	0.12452	SMAD2;CAMK2D;JUN;BTG1;RGS14;RAD21;ZBTB38;PKN1;SKAP1
Plasma Membrane Bounded Cell Projection Assembly (GO:0120031)	837	0.846746	0.855851	0	0	0.533661	0.0887767	CCDC66
Regulation Of Autophagy (GO:0010506)	838	0.851557	0.859686	0	0	0.524611	0.0842992	IL10RA
Protein Polyubiquitination (GO:0000209)	839	0.857739	0.864895	0	0	0.513003	0.0787231	SYVN1
mRNA Processing (GO:0006397)	840	0.862207	0.868366	0	0	0.504623	0.0748151	HNRNPA1
mRNA Splicing, Via Spliceosome (GO:0000398)	841	0.863666	0.868801	0	0	0.501889	0.0735615	HNRNPA1
Positive Regulation Of Protein Phosphorylation (GO:0001934)	842	0.869348	0.873478	0	0	0.491238	0.0687791	RAF1
Regulation Of Cell Migration (GO:0030334)	843	0.880018	0.88315	0	0	0.471215	0.0602274	SERPINE2
Regulation Of Gene Expression (GO:0010468)	844	0.90969	0.911846	0	0	0.578603	0.0547657	BTG1;TXK;ZBTB38;HNRNPA1
Positive Regulation Of DNA-templated Transcription (GO:0045893)	845	0.91421	0.915292	0	0	0.598119	0.053648	SMAD2;JUN;TXK;ZBTB38;SKAP1
Organelle Assembly (GO:0070925)	846	0.91563	0.91563	0	0	0.403153	0.0355349	CCDC66

## Sheet: Uniquely Expressed Jurkat psi
Term	Rank	P.value	Adjusted.P.value	Old.P.value	Old.Adjusted.P.value	Odds.Ratio	Combined.Score	Genes
Mitotic Recombination (GO:0006312)	1	0.00126208	0.645259	0	0	10.9736	73.2487	MSH3;NSMCE2;XRCC3;RAD54B
Skeletal System Development (GO:0001501)	2	0.00281831	0.645259	0	0	4.13217	24.2625	RPS6KA3;AKAP13;CREB3L2;PITX1;FGFR1;RAB33B;RFLNA
B Cell Proliferation (GO:0042100)	3	0.00290274	0.645259	0	0	14.7837	86.3679	CD70;CTPS1;RASGRP1
Negative Regulation Of Mitotic Metaphase/Anaphase Transition (GO:0045841)	4	0.00359439	0.645259	0	0	5.61809	31.6208	IK;CENPF;USP44;FBXO5;HASPIN
Neuromuscular Junction Development (GO:0007528)	5	0.00422806	0.645259	0	0	12.3185	67.3332	UNC13B;CACNB3;GPHN
Regulation Of Cellular Component Organization (GO:0051128)	6	0.00538382	0.645259	0	0	2.79346	14.594	LATS1;SETD5;ING5;METTL4;HNRNPU;TLK1;SGK3;CHPT1;MARK4;RAB33B
Regulation Of Cell Death (GO:0010941)	7	0.00576174	0.645259	0	0	4.94243	25.4857	NOA1;TSC1;DHCR24;ZDHHC17;EIF4G1
Negative Regulation Of Myeloid Leukocyte Differentiation (GO:0002762)	8	0.00586558	0.645259	0	0	10.5577	54.2522	CDK6;GPR137;ZNF675
Negative Regulation Of Kinase Activity (GO:0033673)	9	0.00628234	0.645259	0	0	4.01251	20.3434	AKT1S1;DTNBP1;HNRNPU;THY1;CEP85;PAK2
Hippo Signaling (GO:0035329)	10	0.00783263	0.645259	0	0	9.23704	44.7946	LATS1;LATS2;AMOTL1
Regulation Of Actomyosin Structure Organization (GO:0110020)	11	0.00783263	0.645259	0	0	9.23704	44.7946	AKAP13;TSC1;SLC9A1
Regulation Of Mitotic Metaphase/Anaphase Transition (GO:0030071)	12	0.0078604	0.645259	0	0	3.80597	18.4434	SMARCD1;USP44;NSMCE2;FBXO5;CDC6;CDK5RAP2
Base-Excision Repair (GO:0006284)	13	0.00871668	0.645259	0	0	4.41156	20.9219	PRMT6;NEIL2;NTHL1;PNKP;POLE
Antigen Processing And Presentation Of Endogenous Peptide Antigen Via MHC Class I (GO:0019885)	14	0.00875296	0.645259	0	0	24.5862	116.498	ERAP2;IDE
Regulation Of Organ Growth (GO:0046620)	15	0.00875296	0.645259	0	0	24.5862	116.498	LATS1;LATS2
Regulation Of Phospholipase Activity (GO:0010517)	16	0.00875296	0.645259	0	0	24.5862	116.498	RASGRP1;FGFR1
Resolution Of Recombination Intermediates (GO:0071139)	17	0.00875296	0.645259	0	0	24.5862	116.498	RMI1;XRCC3
Dermatan Sulfate Metabolic Process (GO:0030205)	18	0.00875296	0.645259	0	0	24.5862	116.498	DSE;CHST14
Dermatan Sulfate Proteoglycan Metabolic Process (GO:0050655)	19	0.00875296	0.645259	0	0	24.5862	116.498	DSE;CHST14
Monosaccharide Biosynthetic Process (GO:0046364)	20	0.00875296	0.645259	0	0	24.5862	116.498	DSE;CHST14
Negative Regulation Of Microglial Cell Activation (GO:1903979)	21	0.00875296	0.645259	0	0	24.5862	116.498	GRN;LDLR
Regulation Of Synapse Assembly (GO:0051963)	22	0.010143	0.645259	0	0	8.20988	37.6913	SETD5;PDLIM5;EIF4G1
Negative Regulation Of Cyclin-Dependent Protein Kinase Activity (GO:1904030)	23	0.010143	0.645259	0	0	8.20988	37.6913	HEXIM1;LATS1;LATS2
Negative Regulation Of Cyclin-Dependent Protein Serine/Threonine Kinase Activity (GO:0045736)	24	0.010143	0.645259	0	0	8.20988	37.6913	HEXIM1;LATS1;LATS2
Regulation Of Epithelial Cell Proliferation (GO:0050678)	25	0.0111849	0.645259	0	0	4.11663	18.4968	GRN;CDK6;UHRF1;OXSR1;RAB33B
Peptidyl-Serine Modification (GO:0018209)	26	0.0125205	0.645259	0	0	2.31665	10.1478	LATS1;RPS6KA3;SMG1;LATS2;CAMKV;ULK3;TLK1;SGK3;RICTOR;PAK2;ATR
Peptidyl-Serine Phosphorylation (GO:0018105)	27	0.0132133	0.645259	0	0	2.29695	9.93785	LATS1;RPS6KA3;SMG1;LATS2;CAMKV;ULK3;TLK1;SGK3;RICTOR;PAK2;ATR
Regulation Of Chromatin Organization (GO:1902275)	28	0.0133355	0.645259	0	0	4.93267	21.296	SETD5;METTL4;HNRNPU;TLK1
Regulation Of Cellular Response To Growth Factor Stimulus (GO:0090287)	29	0.0142108	0.645259	0	0	16.3892	69.7155	TWSG1;ZDHHC17
Regulation Of Inflammatory Response To Wounding (GO:0106014)	30	0.0142108	0.645259	0	0	16.3892	69.7155	GRN;GIT1
Regulation Of Mitotic Spindle Checkpoint (GO:1903504)	31	0.0142108	0.645259	0	0	16.3892	69.7155	USP44;CDK5RAP2
Regulation Of Phospholipase C Activity (GO:1900274)	32	0.0142108	0.645259	0	0	16.3892	69.7155	RASGRP1;FGFR1
Extracellular Matrix Assembly (GO:0085029)	33	0.0142108	0.645259	0	0	16.3892	69.7155	PXDN;QSOX1
Negative Regulation Of Osteoclast Differentiation (GO:0045671)	34	0.0142108	0.645259	0	0	16.3892	69.7155	GPR137;ZNF675
Positive Regulation Of Isomerase Activity (GO:0010912)	35	0.0142108	0.645259	0	0	16.3892	69.7155	UHRF1;HNRNPU
Positive Regulation Of mRNA Binding (GO:1902416)	36	0.0142108	0.645259	0	0	16.3892	69.7155	LARP6;EIF4G1
Negative Regulation Of Cell Cycle (GO:0045786)	37	0.0156302	0.645259	0	0	3.22453	13.4094	LATS1;HEXIM1;ZBTB17;LATS2;CDK6;TRIM35
Negative Regulation Of DNA Metabolic Process (GO:0051053)	38	0.0176442	0.645259	0	0	4.48335	18.1008	MSH3;SUB1;CDC6;ATR
External Encapsulating Structure Organization (GO:0045229)	39	0.0192255	0.645259	0	0	6.15556	24.3238	APLP1;GFOD2;PXDN
Lymphocyte Proliferation (GO:0046651)	40	0.0192255	0.645259	0	0	6.15556	24.3238	CD70;CTPS1;RASGRP1
Protein Localization To Chromosome, Centromeric Region (GO:0071459)	41	0.0192255	0.645259	0	0	6.15556	24.3238	IK;KNL1;HASPIN
Regulation Of Extracellular Matrix Organization (GO:1903053)	42	0.0207663	0.645259	0	0	12.2906	47.6191	NOTCH1;RUNX1
Depyrimidination (GO:0045008)	43	0.0207663	0.645259	0	0	12.2906	47.6191	NEIL2;NTHL1
Dermatan Sulfate Proteoglycan Biosynthetic Process (GO:0050651)	44	0.0207663	0.645259	0	0	12.2906	47.6191	DSE;CHST14
Sulfur Amino Acid Biosynthetic Process (GO:0000097)	45	0.0207663	0.645259	0	0	12.2906	47.6191	MTHFD1;GGT1
Negative Regulation Of CD4-positive, Alpha-Beta T Cell Activation (GO:2000515)	46	0.0207663	0.645259	0	0	12.2906	47.6191	TWSG1;RUNX1
Positive Regulation Of Protein Localization To Centrosome (GO:1904781)	47	0.0207663	0.645259	0	0	12.2906	47.6191	PARD6A;MARK4
Positive Regulation Of Small GTPase Mediated Signal Transduction (GO:0051057)	48	0.0207663	0.645259	0	0	12.2906	47.6191	NOTCH1;RASGRP1
Regulation Of DNA Replication (GO:0006275)	49	0.0236822	0.645259	0	0	2.90694	10.8808	ING5;FBXO5;CDC6;INO80;SMC3;ATR
Anterograde Trans-Synaptic Signaling (GO:0098916)	50	0.0257243	0.645259	0	0	3.24736	11.8864	UNC13B;RPS6KA3;CACNB3;DHX8;SPG11
Regulation Of Mitotic Cell Cycle Spindle Assembly Checkpoint (GO:0090266)	51	0.0271181	0.645259	0	0	5.27513	19.0303	USP44;XRCC3;CDK5RAP2
Extracellular Structure Organization (GO:0043062)	52	0.0271181	0.645259	0	0	5.27513	19.0303	APLP1;GFOD2;PXDN
Negative Regulation Of Macroautophagy (GO:0016242)	53	0.0271181	0.645259	0	0	5.27513	19.0303	PHF23;TSC1;QSOX1
Regulation Of Microglial Cell Activation (GO:1903978)	54	0.0283255	0.645259	0	0	9.83153	35.0395	GRN;LDLR
Response To dsRNA (GO:0043331)	55	0.0283255	0.645259	0	0	9.83153	35.0395	PDE12;TICAM1
Retrograde Transport, Vesicle Recycling Within Golgi (GO:0000301)	56	0.0283255	0.645259	0	0	9.83153	35.0395	COG8;COG7
Negative Regulation Of Macrophage Activation (GO:0043031)	57	0.0283255	0.645259	0	0	9.83153	35.0395	GRN;LDLR
Negative Regulation Of Mitotic Nuclear Division (GO:0045839)	58	0.0283255	0.645259	0	0	9.83153	35.0395	USP44;FBXO5
Negative Regulation Of Neuroinflammatory Response (GO:0150079)	59	0.0283255	0.645259	0	0	9.83153	35.0395	GRN;LDLR
Negative Regulation Of Cysteine-Type Endopeptidase Activity Involved In Apoptotic Process (GO:0043154)	60	0.0286206	0.645259	0	0	3.79208	13.4756	RPS6KA3;LAMP3;DHCR24;PAK2
Nucleotide-Excision Repair (GO:0006289)	61	0.0306523	0.645259	0	0	3.08437	10.7492	NTHL1;USP44;PNKP;POLE;DDB2
Regulation Of Transmembrane Receptor Protein Serine/Threonine Kinase Signaling Pathway (GO:0090092)	62	0.0316173	0.645259	0	0	4.92296	17.0042	LATS1;TWSG1;LATS2
Positive Regulation Of Signal Transduction By P53 Class Mediator (GO:1901798)	63	0.0316173	0.645259	0	0	4.92296	17.0042	HEXIM1;RPS15;ATR
Positive Regulation Of Protein-Containing Complex Assembly (GO:0031334)	64	0.0318377	0.645259	0	0	2.69444	9.28801	UNC13B;ICE1;MARK4;AJUBA;ATR;EIF4G1
Regulation Of DNA Metabolic Process (GO:0051052)	65	0.0318564	0.645259	0	0	2.16388	7.45785	ING5;ENY2;SMG1;SUB1;NSMCE2;YLPM1;FBXO5;INO80;SMC3
Regulation Of Neuron Death (GO:1901214)	66	0.0318751	0.645259	0	0	3.65127	12.582	AKT1S1;TSC1;DHCR24;EIF4G1
Protein Modification By Small Protein Conjugation (GO:0032446)	67	0.0340799	0.645259	0	0	1.69287	5.72029	MOCS3;TRIM41;UBA6;MGRN1;NSMCE2;KLHL21;COPS7A;LMO7;PIAS2;PIAS1;HERC5;ANKRD9;RNF144A;TRAF7;RNF103;TRIM35;ZNF598
Cellular Response To Mechanical Stimulus (GO:0071260)	68	0.0353377	0.645259	0	0	3.52051	11.7684	MAP3K2;TNFRSF8;FAS;SLC9A1
Protein Acylation (GO:0043543)	69	0.0353377	0.645259	0	0	3.52051	11.7684	ING5;KAT6A;ZDHHC17;ZDHHC14
Skeletal System Morphogenesis (GO:0048705)	70	0.0364812	0.645259	0	0	4.61481	15.2795	RAB33B;RFLNA;FGFR1
Regulation Of Axonogenesis (GO:0050770)	71	0.0364812	0.645259	0	0	4.61481	15.2795	PLXNA1;THY1;PAK2
Chemical Synaptic Transmission (GO:0007268)	72	0.0365251	0.645259	0	0	2.59937	8.60329	UNC13B;RPS6KA3;CACNB3;PTPRN2;DHX8;SPG11
C-terminal Protein Amino Acid Modification (GO:0018410)	73	0.0367998	0.645259	0	0	8.19212	27.0525	AGTPBP1;ICMT
RISC Complex Assembly (GO:0070922)	74	0.0367998	0.645259	0	0	8.19212	27.0525	HEXIM1;AGO1
Regulation Of Hemopoiesis (GO:1903706)	75	0.0367998	0.645259	0	0	8.19212	27.0525	ING5;KAT6A
Antigen Processing And Presentation Of Endogenous Peptide Antigen (GO:0002483)	76	0.0367998	0.645259	0	0	8.19212	27.0525	ERAP2;IDE
Regulation Of Mitotic Sister Chromatid Segregation (GO:0033047)	77	0.0367998	0.645259	0	0	8.19212	27.0525	USP44;CDK5RAP2
Cellular Response To Catecholamine Stimulus (GO:0071870)	78	0.0367998	0.645259	0	0	8.19212	27.0525	APLP1;SLC9A1
Regulation Of Synapse Organization (GO:0050807)	79	0.0367998	0.645259	0	0	8.19212	27.0525	SETD5;PDLIM5
Response To Fatty Acid (GO:0070542)	80	0.0367998	0.645259	0	0	8.19212	27.0525	IRS1;FOXO3
Cristae Formation (GO:0042407)	81	0.0367998	0.645259	0	0	8.19212	27.0525	UQCC3;DNAJC11
Embryo Development Ending In Birth Or Egg Hatching (GO:0009792)	82	0.0367998	0.645259	0	0	8.19212	27.0525	RICTOR;FGFR1
Telomere Maintenance Via Recombination (GO:0000722)	83	0.0367998	0.645259	0	0	8.19212	27.0525	NSMCE2;XRCC3
Negative Regulation Of Ossification (GO:0030279)	84	0.0367998	0.645259	0	0	8.19212	27.0525	NOTCH1;CHSY1
Negative Regulation Of Ubiquitin Protein Ligase Activity (GO:1904667)	85	0.0367998	0.645259	0	0	8.19212	27.0525	USP44;FBXO5
Phosphate Ion Transmembrane Transport (GO:0035435)	86	0.0367998	0.645259	0	0	8.19212	27.0525	SLC25A10;XPR1
Phosphate Ion Transport (GO:0006817)	87	0.0367998	0.645259	0	0	8.19212	27.0525	SLC25A10;XPR1
Positive Regulation Of Growth (GO:0045927)	88	0.0390887	0.645259	0	0	2.86831	9.29885	RPS6KA3;DDX49;RICTOR;INO80;EIF4G1
Regulation Of Endothelial Cell Chemotaxis To Fibroblast Growth Factor (GO:2000544)	89	0.0392608	0.645259	0	0	Inf	Inf	FGFR1
Regulation Of Natural Killer Cell Cytokine Production (GO:0002727)	90	0.0392608	0.645259	0	0	Inf	Inf	CD226
Regulation Of Voltage-Gated Sodium Channel Activity (GO:1905150)	91	0.0392608	0.645259	0	0	Inf	Inf	SLMAP
Vascular Associated Smooth Muscle Contraction (GO:0014829)	92	0.0392608	0.645259	0	0	Inf	Inf	PIK3C2A
Vasoconstriction (GO:0042310)	93	0.0392608	0.645259	0	0	Inf	Inf	PIK3C2A
Hexose Import Across Plasma Membrane (GO:0140271)	94	0.0392608	0.645259	0	0	Inf	Inf	SLC2A3
Intracellular Phosphate Ion Homeostasis (GO:0030643)	95	0.0392608	0.645259	0	0	Inf	Inf	XPR1
Kidney Mesenchyme Development (GO:0072074)	96	0.0392608	0.645259	0	0	Inf	Inf	OXSR1
Negative Regulation Of Fibrinolysis (GO:0051918)	97	0.0392608	0.645259	0	0	Inf	Inf	USF1
Neurotransmitter-Gated Ion Channel Clustering (GO:0072578)	98	0.0392608	0.645259	0	0	Inf	Inf	GPHN
Pericardium Development (GO:0060039)	99	0.0392608	0.645259	0	0	Inf	Inf	NOTCH1
Pericardium Morphogenesis (GO:0003344)	100	0.0392608	0.645259	0	0	Inf	Inf	NOTCH1
Positive Regulation Of Natural Killer Cell Cytokine Production (GO:0002729)	101	0.0392608	0.645259	0	0	Inf	Inf	CD226
Positive Regulation Of Protein Catabolic Process In The Vacuole (GO:1904352)	102	0.0392608	0.645259	0	0	Inf	Inf	LDLR
Regulation Of Cell Adhesion Molecule Production (GO:0060353)	103	0.0392608	0.645259	0	0	Inf	Inf	NOTCH1
Response To UV (GO:0009411)	104	0.0394415	0.645259	0	0	2.33774	7.55775	RHBDD1;INO80;MAP3K4;MAP4K3;USF1;ATR;DDB2
Positive Regulation Of Apoptotic Process (GO:0043065)	105	0.0428837	0.645259	0	0	1.8258	5.74994	UNC13B;MLLT11;LATS1;ING5;TRAF7;GRN;LATS2;TRIM35;FAS;TNFRSF8;RRP1B;FOXO3
Response To Light Stimulus (GO:0009416)	106	0.0428911	0.645259	0	0	3.28515	10.3452	FECH;MAP4K3;USF1;DDB2
Peptide Metabolic Process (GO:0006518)	107	0.0428911	0.645259	0	0	3.28515	10.3452	ERAP2;IDE;AEBP1;GGT1
DNA Repair (GO:0006281)	108	0.0449258	0.645259	0	0	1.65714	5.14169	PRMT6;FANCI;KMT5C;USP44;PNKP;XRCC3;INO80;DDB2;NEIL2;NTHL1;MSH3;EP400;POLI;MPND;POLE;ATR
Regulation Of Collagen Biosynthetic Process (GO:0032965)	109	0.0461061	0.645259	0	0	7.02111	21.6026	LARP6;RUNX1
T Cell Proliferation (GO:0042098)	110	0.0461061	0.645259	0	0	7.02111	21.6026	CTPS1;RASGRP1
Regulation Of Protein Localization To Centrosome (GO:1904779)	111	0.0461061	0.645259	0	0	7.02111	21.6026	PARD6A;MARK4
Chondroitin Sulfate Metabolic Process (GO:0030204)	112	0.0461061	0.645259	0	0	7.02111	21.6026	CHSY1;DSE
Suppression Of Viral Release By Host (GO:0044790)	113	0.0461061	0.645259	0	0	7.02111	21.6026	TRIM8;TRIM35
Lymphocyte Mediated Immunity (GO:0002449)	114	0.0461061	0.645259	0	0	7.02111	21.6026	CD70;MYO1G
Mitochondrial Ribosome Assembly (GO:0061668)	115	0.0461061	0.645259	0	0	7.02111	21.6026	NOA1;MRM2
Negative Regulation Of Stem Cell Differentiation (GO:2000737)	116	0.0461061	0.645259	0	0	7.02111	21.6026	NOTCH1;HNRNPU
Positive Regulation Of Collagen Biosynthetic Process (GO:0032967)	117	0.0461061	0.645259	0	0	7.02111	21.6026	LARP6;RUNX1
Receptor Clustering (GO:0043113)	118	0.0461061	0.645259	0	0	7.02111	21.6026	FLNA;THY1
Regulation Of Cardiac Muscle Cell Proliferation (GO:0060043)	119	0.0461061	0.645259	0	0	7.02111	21.6026	NOTCH1;RUNX1
Protein Phosphorylation (GO:0006468)	120	0.0488976	0.645259	0	0	1.54671	4.66802	PLK4;SMG1;ILK;OXSR1;HASPIN;LATS1;RPS6KA3;CDK6;LATS2;CAMKV;ULK3;TLK1;RICTOR;SGK3;CDK12;MARK4;PAK2;MAP4K3;ATR;FGFR1
Protein Modification Process (GO:0036211)	121	0.050921	0.645259	0	0	1.44418	4.30002	SMG1;ILK;ING5;PDPR;MACROD1;ST8SIA4;TLK1;MARK4;PAK2;MAP4K3;PLK4;PRMT6;UBL4A;COG7;ICMT;RHBDD1;PPP2R5D;OXSR1;HASPIN;LATS1;CDK6;LATS2;ATG4C;SGK3;ATR;FGFR1;METAP2
Phosphatidylinositol Phosphate Biosynthetic Process (GO:0046854)	122	0.0512824	0.645259	0	0	3.07921	9.1465	PI4K2B;SMG1;TTC7A;PIK3C2A
Protein Deacetylation (GO:0006476)	123	0.0512824	0.645259	0	0	3.07921	9.1465	TBL1XR1;FLNA;SUDS3;MTA2
Positive Regulation Of Cell-Matrix Adhesion (GO:0001954)	124	0.0532069	0.645259	0	0	3.88499	11.3969	CDK6;TSC1;THY1
Protein Targeting To ER (GO:0045047)	125	0.0532069	0.645259	0	0	3.88499	11.3969	UBL4A;SRP72;ZFAND2B
Extracellular Matrix Organization (GO:0030198)	126	0.0557904	0.645259	0	0	2.9856	8.61689	APLP1;GFOD2;PXDN;QSOX1
Positive Regulation Of Programmed Cell Death (GO:0043068)	127	0.0561383	0.645259	0	0	1.79226	5.16159	UNC13B;MLLT11;LATS1;ING5;LATS2;TRIM35;FAS;TNFRSF8;RRP1B;FOXO3;MARK4
Regulation Of Cytosolic Calcium Ion Concentration (GO:0051480)	128	0.0561662	0.645259	0	0	6.14286	17.688	TRPM2;SLC35G1
SRP-dependent Cotranslational Protein Targeting To Membrane (GO:0006614)	129	0.0561662	0.645259	0	0	6.14286	17.688	SRP72;ZFAND2B
UV-damage Excision Repair (GO:0070914)	130	0.0561662	0.645259	0	0	6.14286	17.688	INO80;DDB2
Regulation Of Mitotic Sister Chromatid Separation (GO:0010965)	131	0.0561662	0.645259	0	0	6.14286	17.688	USP44;CDK5RAP2
Base-Excision Repair, AP Site Formation (GO:0006285)	132	0.0561662	0.645259	0	0	6.14286	17.688	NEIL2;NTHL1
Cellular Response To Nitrogen Compound (GO:1901699)	133	0.0561662	0.645259	0	0	6.14286	17.688	PDE12;DDX11
Chondrocyte Differentiation (GO:0002062)	134	0.0561662	0.645259	0	0	6.14286	17.688	CREB3L2;OXSR1
Serine Family Amino Acid Biosynthetic Process (GO:0009070)	135	0.0561662	0.645259	0	0	6.14286	17.688	MTHFD1;GGT1
Negative Regulation Of Cell Development (GO:0010721)	136	0.0561662	0.645259	0	0	6.14286	17.688	NOTCH1;RFLNA
Negative Regulation Of Chemotaxis (GO:0050922)	137	0.0561662	0.645259	0	0	6.14286	17.688	SEMA4A;NOTCH1
Phosphatidylcholine Biosynthetic Process (GO:0006656)	138	0.0561662	0.645259	0	0	6.14286	17.688	GPAT4;CHPT1
Positive Regulation Of Collagen Metabolic Process (GO:0010714)	139	0.0561662	0.645259	0	0	6.14286	17.688	LARP6;RUNX1
Positive Regulation Of Cytokine Production Involved In Inflammatory Response (GO:1900017)	140	0.0561662	0.645259	0	0	6.14286	17.688	TICAM1;IL17RA
Positive Regulation Of Double-Strand Break Repair Via Nonhomologous End Joining (GO:2001034)	141	0.0561662	0.645259	0	0	6.14286	17.688	KMT5C;PNKP
Positive Regulation Of Focal Adhesion Assembly (GO:0051894)	142	0.0561662	0.645259	0	0	6.14286	17.688	TSC1;THY1
Positive Regulation Of Immunoglobulin Mediated Immune Response (GO:0002891)	143	0.0561662	0.645259	0	0	6.14286	17.688	KMT5C;CD226
Positive Regulation Of Natural Killer Cell Mediated Cytotoxicity (GO:0045954)	144	0.0561662	0.645259	0	0	6.14286	17.688	CD226;RASGRP1
Positive Regulation Of Natural Killer Cell Mediated Immunity (GO:0002717)	145	0.0561662	0.645259	0	0	6.14286	17.688	CD226;RASGRP1
Protein Localization To Condensed Chromosome (GO:1903083)	146	0.0561662	0.645259	0	0	6.14286	17.688	IK;KNL1
Pyrimidine Deoxyribonucleotide Catabolic Process (GO:0009223)	147	0.0561662	0.645259	0	0	6.14286	17.688	NEIL2;NTHL1
DNA Synthesis Involved In DNA Repair (GO:0000731)	148	0.0594689	0.645259	0	0	3.69037	10.4153	USP10;POLI;POLE
Regulation Of Cell-Substrate Adhesion (GO:0010810)	149	0.0594689	0.645259	0	0	3.69037	10.4153	NOTCH1;TSC1;THY1
Regulation Of Chromosome Organization (GO:0033044)	150	0.0605048	0.645259	0	0	2.8975	8.12757	SMG1;NSMCE2;YLPM1;INO80
Positive Regulation Of Double-Strand Break Repair (GO:2000781)	151	0.0629275	0.645259	0	0	2.24288	6.20329	ACTR2;SMARCD1;KMT5C;DDX11;PNKP;EP400
miRNA-mediated Gene Silencing (GO:0035195)	152	0.0660594	0.645259	0	0	3.51429	9.54902	XPO5;AJUBA;EIF4G1
Negative Regulation Of Protein Phosphorylation (GO:0001933)	153	0.0662443	0.645259	0	0	2.05736	5.5845	PPP1R15B;AKT1S1;DTNBP1;THY1;CEP85;PAK2;EIF4G1
Histone Modification (GO:0016570)	154	0.0664096	0.645259	0	0	2.20918	5.9911	ING5;ENY2;TBL1XR1;EP400;SUDS3;MTA2
Regulation Of Cellular Respiration (GO:0043457)	155	0.066907	0.645259	0	0	5.45977	14.7657	NOA1;IDE
T Cell Mediated Immunity (GO:0002456)	156	0.066907	0.645259	0	0	5.45977	14.7657	CD70;MYO1G
Adaptive Immune Response Based On Somatic Recombination Of Immune Receptors Built From Immunoglobulin Superfamily Domains (GO:0002460)	157	0.066907	0.645259	0	0	5.45977	14.7657	CD70;MYO1G
Base-Excision Repair, Gap-Filling (GO:0006287)	158	0.066907	0.645259	0	0	5.45977	14.7657	PNKP;POLE
Cytoplasmic Sequestering Of Protein (GO:0051220)	159	0.066907	0.645259	0	0	5.45977	14.7657	LATS1;FLNA
Positive Regulation Of T Cell Migration (GO:2000406)	160	0.066907	0.645259	0	0	5.45977	14.7657	SPN;OXSR1
Protein Localization To Kinetochore (GO:0034501)	161	0.066907	0.645259	0	0	5.45977	14.7657	IK;KNL1
Regulation Of Cell Cycle G2/M Phase Transition (GO:1902749)	162	0.066907	0.645259	0	0	5.45977	14.7657	CENPF;CDK6
Negative Regulation Of Protein Kinase Activity (GO:0006469)	163	0.067909	0.645259	0	0	2.41644	6.49921	AKT1S1;DTNBP1;THY1;CEP85;PAK2
Regulation Of Cell Motility (GO:2000145)	164	0.067909	0.645259	0	0	2.41644	6.49921	CDK6;PLXNA1;FLNA;SGK3;AMOTL1
Regulation Of Cell-Matrix Adhesion (GO:0001952)	165	0.0705444	0.645259	0	0	2.73597	7.25447	CDK6;TSC1;THY1;SLC9A1
Cilium Organization (GO:0044782)	166	0.0710086	0.645259	0	0	1.76669	4.67282	PLK4;AHI1;ACTR2;EHD4;NOTCH1;IFT81;IFT140;TMEM237;FLNA;MARK4
Circulatory System Development (GO:0072359)	167	0.0721615	0.645259	0	0	2.36973	6.22965	AKAP13;NOTCH1;MTHFD1;OXSR1;PDLIM5
Regulation Of Cytokine Production Involved In Inflammatory Response (GO:1900015)	168	0.0729682	0.645259	0	0	3.35421	8.78042	CUEDC2;TICAM1;IL17RA
Spindle Assembly Checkpoint Signaling (GO:0071173)	169	0.0729682	0.645259	0	0	3.35421	8.78042	IK;CENPF;HASPIN
Mitotic Spindle Assembly Checkpoint Signaling (GO:0007094)	170	0.0729682	0.645259	0	0	3.35421	8.78042	IK;CENPF;HASPIN
Mitotic Spindle Checkpoint Signaling (GO:0071174)	171	0.0729682	0.645259	0	0	3.35421	8.78042	IK;CENPF;HASPIN
Positive Regulation Of Ras Protein Signal Transduction (GO:0046579)	172	0.0729682	0.645259	0	0	3.35421	8.78042	AKAP13;NOTCH1;RASGRP1
Regulation Of Cell Development (GO:0060284)	173	0.0729682	0.645259	0	0	3.35421	8.78042	ING5;GRN;KAT6A
Protein Localization To Membrane (GO:0072657)	174	0.0732299	0.645259	0	0	1.9	4.96689	TM9SF1;CACNB3;EHD4;SLMAP;FLNA;HPS6;TTC7A;THY1
DNA Recombination (GO:0006310)	175	0.0758643	0.645259	0	0	2.66176	6.86417	RMI1;MSH3;XRCC3;RAD54B
Retrograde Vesicle-Mediated Transport, Golgi To Endoplasmic Reticulum (GO:0006890)	176	0.0758643	0.645259	0	0	2.66176	6.86417	NBAS;COG7;BNIP1;KIF1C
Regulation Of Cyclin-Dependent Protein Serine/Threonine Kinase Activity (GO:0000079)	177	0.0765567	0.645259	0	0	2.32478	5.97404	HERC5;LATS1;HEXIM1;LATS2;CDC6
Regulation Of Excitatory Synapse Assembly (GO:1904889)	178	0.0769839	0.645259	0	0	24.5283	62.8944	SEMA4A
Adenylate Cyclase-Activating Adrenergic Receptor Signaling Pathway (GO:0071880)	179	0.0769839	0.645259	0	0	24.5283	62.8944	AKAP13
Regulation Of Neutrophil Activation (GO:1902563)	180	0.0769839	0.645259	0	0	24.5283	62.8944	GRN
Body Fluid Secretion (GO:0007589)	181	0.0769839	0.645259	0	0	24.5283	62.8944	GPAT4
Calcium Ion Transport Into Cytosol (GO:0060402)	182	0.0769839	0.645259	0	0	24.5283	62.8944	CACNB3
Cell Differentiation Involved In Metanephros Development (GO:0072202)	183	0.0769839	0.645259	0	0	24.5283	62.8944	OXSR1
Cell Migration Involved In Heart Development (GO:0060973)	184	0.0769839	0.645259	0	0	24.5283	62.8944	NOTCH1
Cellular Response To Gonadotropin Stimulus (GO:0071371)	185	0.0769839	0.645259	0	0	24.5283	62.8944	NOTCH1
Response To Manganese Ion (GO:0010042)	186	0.0769839	0.645259	0	0	24.5283	62.8944	D2HGDH
Fructose Transmembrane Transport (GO:0015755)	187	0.0769839	0.645259	0	0	24.5283	62.8944	SLC2A3
Glandular Epithelial Cell Development (GO:0002068)	188	0.0769839	0.645259	0	0	24.5283	62.8944	CDK6
Glomerulus Vasculature Development (GO:0072012)	189	0.0769839	0.645259	0	0	24.5283	62.8944	OXSR1
Type B Pancreatic Cell Development (GO:0003323)	190	0.0769839	0.645259	0	0	24.5283	62.8944	CDK6
Type B Pancreatic Cell Differentiation (GO:0003309)	191	0.0769839	0.645259	0	0	24.5283	62.8944	CDK6
Ureter Development (GO:0072189)	192	0.0769839	0.645259	0	0	24.5283	62.8944	OXSR1
Ureteric Bud Development (GO:0001657)	193	0.0769839	0.645259	0	0	24.5283	62.8944	OXSR1
Venous Blood Vessel Morphogenesis (GO:0048845)	194	0.0769839	0.645259	0	0	24.5283	62.8944	NOTCH1
Kidney Epithelium Development (GO:0072073)	195	0.0769839	0.645259	0	0	24.5283	62.8944	OXSR1
Lactation (GO:0007595)	196	0.0769839	0.645259	0	0	24.5283	62.8944	GPAT4
Mesonephric Tubule Development (GO:0072164)	197	0.0769839	0.645259	0	0	24.5283	62.8944	OXSR1
Metanephric Mesenchyme Development (GO:0072075)	198	0.0769839	0.645259	0	0	24.5283	62.8944	OXSR1
Negative Regulation Of Alpha-Beta T Cell Activation (GO:0046636)	199	0.0769839	0.645259	0	0	24.5283	62.8944	TWSG1
Negative Regulation Of Intracellular Transport (GO:0032387)	200	0.0769839	0.645259	0	0	24.5283	62.8944	ARHGAP1
Negative Regulation Of Smooth Muscle Cell Apoptotic Process (GO:0034392)	201	0.0769839	0.645259	0	0	24.5283	62.8944	DNMT1
Nephron Tubule Development (GO:0072080)	202	0.0769839	0.645259	0	0	24.5283	62.8944	OXSR1
Neurotransmitter Receptor Diffusion Trapping (GO:0099628)	203	0.0769839	0.645259	0	0	24.5283	62.8944	GPHN
Osmosensory Signaling Pathway (GO:0007231)	204	0.0769839	0.645259	0	0	24.5283	62.8944	OXSR1
Phosphate Ion Homeostasis (GO:0055062)	205	0.0769839	0.645259	0	0	24.5283	62.8944	XPR1
Positive Regulation Of Defense Response To Bacterium (GO:1900426)	206	0.0769839	0.645259	0	0	24.5283	62.8944	GRN
Positive Regulation Of Gastrulation (GO:2000543)	207	0.0769839	0.645259	0	0	24.5283	62.8944	OXSR1
Positive Regulation Of Granulocyte Macrophage Colony-Stimulating Factor Production (GO:0032725)	208	0.0769839	0.645259	0	0	24.5283	62.8944	RASGRP1
Positive Regulation Of Inositol Phosphate Biosynthetic Process (GO:0060732)	209	0.0769839	0.645259	0	0	24.5283	62.8944	DHX8
Positive Regulation Of Membrane Depolarization (GO:1904181)	210	0.0769839	0.645259	0	0	24.5283	62.8944	MLLT11
Positive Regulation Of Neurotransmitter Secretion (GO:0001956)	211	0.0769839	0.645259	0	0	24.5283	62.8944	DTNBP1
Positive Regulation Of Transcription Of Notch Receptor Target (GO:0007221)	212	0.0769839	0.645259	0	0	24.5283	62.8944	NOTCH1
Postsynaptic Membrane Organization (GO:0001941)	213	0.0769839	0.645259	0	0	24.5283	62.8944	GPHN
Postsynaptic Neurotransmitter Receptor Diffusion Trapping (GO:0098970)	214	0.0769839	0.645259	0	0	24.5283	62.8944	GPHN
Pronephros Development (GO:0048793)	215	0.0769839	0.645259	0	0	24.5283	62.8944	OXSR1
Regulation Of 3'-UTR-mediated mRNA Stabilization (GO:1905868)	216	0.0769839	0.645259	0	0	24.5283	62.8944	LARP4B
Regulation Of CD4-positive, Alpha-Beta T Cell Activation (GO:2000514)	217	0.0769839	0.645259	0	0	24.5283	62.8944	TWSG1
Regulation Of Cdc42 Protein Signal Transduction (GO:0032489)	218	0.0769839	0.645259	0	0	24.5283	62.8944	RALBP1
Regulation Of NAD(P)H Oxidase Activity (GO:0033860)	219	0.0769839	0.645259	0	0	24.5283	62.8944	RFK
Regulation Of NK T Cell Activation (GO:0051133)	220	0.0769839	0.645259	0	0	24.5283	62.8944	HSPH1
Regulation Of Atrial Cardiac Muscle Cell Membrane Repolarization (GO:0060372)	221	0.0769839	0.645259	0	0	24.5283	62.8944	FLNA
Regulation Of Cardiac Muscle Cell Membrane Potential (GO:0086036)	222	0.0769839	0.645259	0	0	24.5283	62.8944	SLC9A1
Regulation Of Cellular Extravasation (GO:0002691)	223	0.0769839	0.645259	0	0	24.5283	62.8944	THY1
Protein Ubiquitination (GO:0016567)	224	0.0778749	0.645259	0	0	1.48474	3.79003	MARCHF2;ANKIB1;TRIM41;MGRN1;UBA6;UHRF1;KLHL21;LMO7;UBE2J2;DDB2;ANKRD9;HERC5;RNF144A;TRAF7;RNF103;TRIM35;RBCK1;ZNF598
Antigen Processing And Presentation Of Peptide Antigen Via MHC Class I (GO:0002474)	225	0.0782598	0.645259	0	0	4.9133	12.5177	ERAP2;IDE
Regulation Of Protein Processing (GO:0070613)	226	0.0782598	0.645259	0	0	4.9133	12.5177	RHBDD1;RUNX1
Semaphorin-Plexin Signaling Pathway (GO:0071526)	227	0.0782598	0.645259	0	0	4.9133	12.5177	SEMA4A;FLNA
Negative Regulation Of Cellular Senescence (GO:2000773)	228	0.0782598	0.645259	0	0	4.9133	12.5177	CDK6;FBXO5
Positive Regulation Of Neuron Apoptotic Process (GO:0043525)	229	0.0782598	0.645259	0	0	4.9133	12.5177	GRN;FOXO3
Regulation Of Cell Migration Involved In Sprouting Angiogenesis (GO:0090049)	230	0.0782598	0.645259	0	0	4.9133	12.5177	NOTCH1;PIK3C2A
Mesenchymal Cell Differentiation (GO:0048762)	231	0.0801844	0.645259	0	0	3.20805	8.09528	NOTCH1;ZFP64;FGFR1
Positive Regulation Of ATP-dependent Activity (GO:0032781)	232	0.0801844	0.645259	0	0	3.20805	8.09528	UHRF1;MSH3;HNRNPU
Positive Regulation Of Cell Growth (GO:0030307)	233	0.0810934	0.645259	0	0	2.2815	5.73148	RPS6KA3;DDX49;RICTOR;INO80;EIF4G1
Sulfur Compound Biosynthetic Process (GO:0044272)	234	0.0813801	0.645259	0	0	2.59145	6.50098	CHSY1;DSE;CHST14;GGT1
Positive Regulation Of Apoptotic Signaling Pathway (GO:2001235)	235	0.0870884	0.645259	0	0	2.52475	6.16249	ING5;TRAF7;FAS;PAK2
Protein Monoubiquitination (GO:0006513)	236	0.0870884	0.645259	0	0	2.52475	6.16249	TRIM41;MGRN1;UHRF1;ZNF598
Chromosome Organization (GO:0051276)	237	0.0876965	0.645259	0	0	3.07407	7.48191	LATS1;MSH3;KAT6A
intra-Golgi Vesicle-Mediated Transport (GO:0006891)	238	0.0876965	0.645259	0	0	3.07407	7.48191	COG8;COG7;RAB33B
Regulation Of G2/M Transition Of Mitotic Cell Cycle (GO:0010389)	239	0.0876965	0.645259	0	0	3.07407	7.48191	CENPF;CDK6;FBXO5
Regulation Of Natural Killer Cell Mediated Cytotoxicity (GO:0042269)	240	0.0901603	0.645259	0	0	4.46619	10.7464	CD226;RASGRP1
Regulation Of Regulated Secretory Pathway (GO:1903305)	241	0.0901603	0.645259	0	0	4.46619	10.7464	RAB15;DTNBP1
Negative Regulation Of G Protein-Coupled Receptor Signaling Pathway (GO:0045744)	242	0.0901603	0.645259	0	0	4.46619	10.7464	MGRN1;APLP1
Negative Regulation Of Transcription Elongation By RNA Polymerase II (GO:0034244)	243	0.0901603	0.645259	0	0	4.46619	10.7464	HEXIM1;HNRNPU
Nuclear Chromosome Segregation (GO:0098813)	244	0.0901603	0.645259	0	0	4.46619	10.7464	LATS1;CENPF
Peptide Catabolic Process (GO:0043171)	245	0.0901603	0.645259	0	0	4.46619	10.7464	ERAP2;IDE
Positive Regulation Of Oxidoreductase Activity (GO:0051353)	246	0.0901603	0.645259	0	0	4.46619	10.7464	PDPR;RFK
Proteoglycan Metabolic Process (GO:0006029)	247	0.0901603	0.645259	0	0	4.46619	10.7464	CHST10;CHST14
Regulation Of Biomineral Tissue Development (GO:0070167)	248	0.0901603	0.645259	0	0	4.46619	10.7464	NOTCH1;FBXO5
Regulation Of Cell Junction Assembly (GO:1901888)	249	0.0901603	0.645259	0	0	4.46619	10.7464	SETD5;PDLIM5
tRNA Modification (GO:0006400)	250	0.0905856	0.645259	0	0	2.19957	5.28219	PUS3;MOCS3;WDR4;TRMT44;DUS1L
Negative Regulation Of Developmental Process (GO:0051093)	251	0.0905856	0.645259	0	0	2.19957	5.28219	SMARCD1;NOTCH1;CDK6;THY1;SUDS3
Positive Regulation Of DNA-templated Transcription (GO:0045893)	252	0.0924324	0.645259	0	0	1.28483	3.05953	CSRNP2;ENY2;NOTCH1;ICE1;UHRF1;HNRNPU;ILK;FOXO3;ELK1;MED17;PTMS;SLC9A1;RPS6KA3;EDRF1;CREB3L2;EP400;NFATC2IP;CAMTA2;MTA2;CDK5RAP2;ACTR2;ZBTB17;ZNF281;LMO7;INO80;OXSR1;RRP1B;PPRC1;USF1;RUNX1;MLLT11;AHI1;ELF2;TBL1XR1;AGO1;KAT6A;CDK12;NFE2L1
Golgi Vesicle Transport (GO:0048193)	253	0.0927454	0.645259	0	0	1.66984	3.9707	CYTH3;COG8;NBAS;COG7;BNIP1;KIF1C;SEC24D;RAB33B;ARCN1;SEC22C
Regulation Of Telomere Maintenance Via Telomerase (GO:0032210)	254	0.0929853	0.645259	0	0	2.46139	5.84656	PNKP;HNRNPU;MAP3K4;ATR
Negative Regulation Of Cellular Metabolic Process (GO:0031324)	255	0.0954926	0.645259	0	0	2.95081	6.9306	CDK6;FBXO5;GIT1
Phosphorylation (GO:0016310)	256	0.0965747	0.645259	0	0	1.45337	3.39717	PLK4;SMG1;ILK;OXSR1;HASPIN;HK2;LATS1;CDK6;LATS2;TLK1;RICTOR;SGK3;MARK4;PAK2;MAP4K3;ATR;FGFR1
Axonogenesis (GO:0007409)	257	0.0982101	0.645259	0	0	1.97194	4.57618	ROBO3;SEMA4A;NOTCH1;APLP1;SPG11;ZDHHC17
Cell Cycle G1/S Phase Transition (GO:0044843)	258	0.0990666	0.645259	0	0	2.40111	5.55128	LATS1;LATS2;CDK6;POLE
Regulation Of Myeloid Cell Differentiation (GO:0045637)	259	0.102548	0.645259	0	0	4.0936	9.32285	PRMT6;CDK6
Response To Interferon-Alpha (GO:0035455)	260	0.102548	0.645259	0	0	4.0936	9.32285	PDE12;LAMP3
Toll-Like Receptor Signaling Pathway (GO:0002224)	261	0.102548	0.645259	0	0	4.0936	9.32285	RPS6KA3;TICAM1
Negative Regulation Of Neurogenesis (GO:0050768)	262	0.102548	0.645259	0	0	4.0936	9.32285	NOTCH1;THY1
Negative Regulation Of Smoothened Signaling Pathway (GO:0045879)	263	0.102548	0.645259	0	0	4.0936	9.32285	MGRN1;ULK3
Peptidyl-Glutamic Acid Modification (GO:0018200)	264	0.102548	0.645259	0	0	4.0936	9.32285	AGTPBP1;TTLL1
Positive Regulation Of Neuron Death (GO:1901216)	265	0.102548	0.645259	0	0	4.0936	9.32285	GRN;FOXO3
Positive Regulation Of Telomere Capping (GO:1904355)	266	0.102548	0.645259	0	0	4.0936	9.32285	PNKP;MAP3K4
Actin Cytoskeleton Reorganization (GO:0031532)	267	0.10356	0.645259	0	0	2.83704	6.43327	DTNBP1;FLNA;RICTOR
Regulation Of Smoothened Signaling Pathway (GO:0008589)	268	0.10356	0.645259	0	0	2.83704	6.43327	IFT81;MGRN1;ULK3
Insulin Receptor Signaling Pathway (GO:0008286)	269	0.10356	0.645259	0	0	2.83704	6.43327	IRS1;IDE;PIK3C2A
Negative Regulation Of Cell Adhesion (GO:0007162)	270	0.10356	0.645259	0	0	2.83704	6.43327	SPN;NOTCH1;PLXNA1
Negative Regulation Of Cysteine-Type Endopeptidase Activity (GO:2000117)	271	0.10356	0.645259	0	0	2.83704	6.43327	RPS6KA3;LAMP3;DHCR24
Negative Regulation Of Organelle Assembly (GO:1902116)	272	0.10356	0.645259	0	0	2.83704	6.43327	USP10;PHF23;CDK5RAP2
Positive Regulation Of Telomere Maintenance Via Telomerase (GO:0032212)	273	0.10356	0.645259	0	0	2.83704	6.43327	PNKP;MAP3K4;ATR
Cellular Response To Light Stimulus (GO:0071482)	274	0.105328	0.645259	0	0	2.34371	5.27493	RHBDD1;INO80;DDB2;ATR
Heart Development (GO:0007507)	275	0.111197	0.645259	0	0	2.05211	4.50737	AKAP13;NOTCH1;MTHFD1;OXSR1;PDLIM5
Extrinsic Apoptotic Signaling Pathway (GO:0097191)	276	0.111764	0.645259	0	0	2.28897	5.01596	MLLT11;CD70;FAS;DEDD
Regulation Of Apoptotic Signaling Pathway (GO:2001233)	277	0.111887	0.645259	0	0	2.73169	5.98312	ING5;TRAF7;FAS
C-terminal Protein Deglutamylation (GO:0035609)	278	0.113229	0.645259	0	0	12.2629	26.7128	AGTPBP1
Regulation Of Dopamine Receptor Signaling Pathway (GO:0060159)	279	0.113229	0.645259	0	0	12.2629	26.7128	DTNBP1
Regulation Of Dopamine Secretion (GO:0014059)	280	0.113229	0.645259	0	0	12.2629	26.7128	DTNBP1
Regulation Of Entry Of Bacterium Into Host Cell (GO:2000535)	281	0.113229	0.645259	0	0	12.2629	26.7128	EXOC2
L-ascorbic Acid Metabolic Process (GO:0019852)	282	0.113229	0.645259	0	0	12.2629	26.7128	SLC2A3
Regulation Of Granulocyte Macrophage Colony-Stimulating Factor Production (GO:0032645)	283	0.113229	0.645259	0	0	12.2629	26.7128	RASGRP1
T Cell Apoptotic Process (GO:0070231)	284	0.113229	0.645259	0	0	12.2629	26.7128	FAS
Regulation Of Interleukin-1-Mediated Signaling Pathway (GO:2000659)	285	0.113229	0.645259	0	0	12.2629	26.7128	ZNF675
Regulation Of Lysosomal Protein Catabolic Process (GO:1905165)	286	0.113229	0.645259	0	0	12.2629	26.7128	LDLR
Adult Locomotory Behavior (GO:0008344)	287	0.113229	0.645259	0	0	12.2629	26.7128	TSC1
Regulation Of Meiotic Nuclear Division (GO:0040020)	288	0.113229	0.645259	0	0	12.2629	26.7128	FBXO5
Atrioventricular Valve Formation (GO:0003190)	289	0.113229	0.645259	0	0	12.2629	26.7128	NOTCH1
Basement Membrane Organization (GO:0071711)	290	0.113229	0.645259	0	0	12.2629	26.7128	PXDN
Regulation Of Presynapse Assembly (GO:1905606)	291	0.113229	0.645259	0	0	12.2629	26.7128	EIF4G1
Regulation Of Presynapse Organization (GO:0099174)	292	0.113229	0.645259	0	0	12.2629	26.7128	EIF4G1
Calcium Ion-Regulated Exocytosis Of Neurotransmitter (GO:0048791)	293	0.113229	0.645259	0	0	12.2629	26.7128	UNC13B
Cardiac Atrium Development (GO:0003230)	294	0.113229	0.645259	0	0	12.2629	26.7128	NOTCH1
Cardiac Cell Development (GO:0055006)	295	0.113229	0.645259	0	0	12.2629	26.7128	NOTCH1
Cardiac Muscle Cell Development (GO:0055013)	296	0.113229	0.645259	0	0	12.2629	26.7128	PDLIM5
Regulation Of Striated Muscle Tissue Development (GO:0016202)	297	0.113229	0.645259	0	0	12.2629	26.7128	CENPF
Cellular Response To Granulocyte Macrophage Colony-Stimulating Factor Stimulus (GO:0097011)	298	0.113229	0.645259	0	0	12.2629	26.7128	PDE1B
Cellular Response To Histamine (GO:0071420)	299	0.113229	0.645259	0	0	12.2629	26.7128	DHX8
Chemokine (C-X-C Motif) Ligand 12 Signaling Pathway (GO:0038146)	300	0.113229	0.645259	0	0	12.2629	26.7128	OXSR1
Cholesterol Import (GO:0070508)	301	0.113229	0.645259	0	0	12.2629	26.7128	LDLR
Coronary Vasculature Morphogenesis (GO:0060977)	302	0.113229	0.645259	0	0	12.2629	26.7128	NOTCH1
Response To Granulocyte Macrophage Colony-Stimulating Factor (GO:0097012)	303	0.113229	0.645259	0	0	12.2629	26.7128	PDE1B
Response To Histamine (GO:0034776)	304	0.113229	0.645259	0	0	12.2629	26.7128	DHX8
Dehydroascorbic Acid Transport (GO:0070837)	305	0.113229	0.645259	0	0	12.2629	26.7128	SLC2A3
Response To Magnesium Ion (GO:0032026)	306	0.113229	0.645259	0	0	12.2629	26.7128	D2HGDH
Dendrite Self-Avoidance (GO:0070593)	307	0.113229	0.645259	0	0	12.2629	26.7128	ROBO3
Dense Core Granule Cytoskeletal Transport (GO:0099519)	308	0.113229	0.645259	0	0	12.2629	26.7128	KIF1C
Semaphorin-Plexin Signaling Pathway Involved In Neuron Projection Guidance (GO:1902285)	309	0.113229	0.645259	0	0	12.2629	26.7128	PLXNA1
Embryonic Hindlimb Morphogenesis (GO:0035116)	310	0.113229	0.645259	0	0	12.2629	26.7128	OXSR1
Serine Family Amino Acid Catabolic Process (GO:0009071)	311	0.113229	0.645259	0	0	12.2629	26.7128	GCSH
Embryonic Skeletal Joint Development (GO:0072498)	312	0.113229	0.645259	0	0	12.2629	26.7128	OXSR1
Somite Development (GO:0061053)	313	0.113229	0.645259	0	0	12.2629	26.7128	MTHFD1
Succinate Transport (GO:0015744)	314	0.113229	0.645259	0	0	12.2629	26.7128	SLC25A10
Synaptic Transmission, Glutamatergic (GO:0035249)	315	0.113229	0.645259	0	0	12.2629	26.7128	UNC13B
Synaptic Vesicle Docking (GO:0016081)	316	0.113229	0.645259	0	0	12.2629	26.7128	UNC13B
fatty-acyl-CoA Catabolic Process (GO:0036115)	317	0.113229	0.645259	0	0	12.2629	26.7128	NUDT8
Glutathione Catabolic Process (GO:0006751)	318	0.113229	0.645259	0	0	12.2629	26.7128	GGT1
Vascular Associated Smooth Muscle Cell Development (GO:0097084)	319	0.113229	0.645259	0	0	12.2629	26.7128	NOTCH1
Hindlimb Morphogenesis (GO:0035137)	320	0.113229	0.645259	0	0	12.2629	26.7128	OXSR1
Intestinal Cholesterol Absorption (GO:0030299)	321	0.113229	0.645259	0	0	12.2629	26.7128	LDLR
Leukotriene D4 Metabolic Process (GO:1901748)	322	0.113229	0.645259	0	0	12.2629	26.7128	GGT1
Mammary Gland Epithelial Cell Differentiation (GO:0060644)	323	0.113229	0.645259	0	0	12.2629	26.7128	LATS1
Medium-Chain fatty-acyl-CoA Metabolic Process (GO:0036112)	324	0.113229	0.645259	0	0	12.2629	26.7128	NUDT8
Mesonephros Development (GO:0001823)	325	0.113229	0.645259	0	0	12.2629	26.7128	OXSR1
Negative Regulation Of CD4-positive, Alpha-Beta T Cell Proliferation (GO:2000562)	326	0.113229	0.645259	0	0	12.2629	26.7128	TWSG1
Negative Regulation Of Astrocyte Differentiation (GO:0048712)	327	0.113229	0.645259	0	0	12.2629	26.7128	LDLR
Negative Regulation Of Cell Activation (GO:0050866)	328	0.113229	0.645259	0	0	12.2629	26.7128	LDLR
Negative Regulation Of Inflammatory Response To Wounding (GO:0106015)	329	0.113229	0.645259	0	0	12.2629	26.7128	GIT1
Negative Regulation Of Lipoprotein Particle Clearance (GO:0010985)	330	0.113229	0.645259	0	0	12.2629	26.7128	LDLR
Negative Regulation Of Meiotic Cell Cycle (GO:0051447)	331	0.113229	0.645259	0	0	12.2629	26.7128	FBXO5
Positive Regulation Of Cell Activation (GO:0050867)	332	0.113229	0.645259	0	0	12.2629	26.7128	FLNA
Positive Regulation Of Interleukin-23 Production (GO:0032747)	333	0.113229	0.645259	0	0	12.2629	26.7128	IL17RA
Positive Regulation Of Protein Maturation (GO:1903319)	334	0.113229	0.645259	0	0	12.2629	26.7128	RHBDD1
Protein Deglutamylation (GO:0035608)	335	0.113229	0.645259	0	0	12.2629	26.7128	AGTPBP1
Regulation Of MHC Class I Biosynthetic Process (GO:0045343)	336	0.113229	0.645259	0	0	12.2629	26.7128	HSPH1
Regulation Of Developmental Growth (GO:0048638)	337	0.115367	0.645259	0	0	3.77833	8.15981	LATS1;LATS2
Regulation Of Ossification (GO:0030278)	338	0.115367	0.645259	0	0	3.77833	8.15981	NOTCH1;CHSY1
Regulation Of Osteoclast Differentiation (GO:0045670)	339	0.115367	0.645259	0	0	3.77833	8.15981	GPR137;ZNF675
Cartilage Development (GO:0051216)	340	0.115367	0.645259	0	0	3.77833	8.15981	CREB3L2;OXSR1
Regulation Of Sodium Ion Transmembrane Transporter Activity (GO:2000649)	341	0.115367	0.645259	0	0	3.77833	8.15981	SLMAP;OXSR1
Cellular Response To Low-Density Lipoprotein Particle Stimulus (GO:0071404)	342	0.115367	0.645259	0	0	3.77833	8.15981	TICAM1;LDLR
Regulation Of Ubiquitin Protein Ligase Activity (GO:1904666)	343	0.115367	0.645259	0	0	3.77833	8.15981	USP44;FBXO5
Positive Regulation Of Cell-Substrate Junction Organization (GO:0150117)	344	0.115367	0.645259	0	0	3.77833	8.15981	TSC1;THY1
Purine Nucleotide Biosynthetic Process (GO:0006164)	345	0.115367	0.645259	0	0	3.77833	8.15981	MTHFD1;QPRT
Regulation Of Cardiac Muscle Hypertrophy (GO:0010611)	346	0.115367	0.645259	0	0	3.77833	8.15981	NOTCH1;SLC9A1
Regulation Of Cellular Catabolic Process (GO:0031329)	347	0.118371	0.645259	0	0	2.23672	4.77301	USP10;LAMP3;ULK3;GPR137
Regulation Of Apoptotic Process (GO:0042981)	348	0.119528	0.645259	0	0	1.33383	2.83333	UNC13B;RHBDD1;DHCR24;OXSR1;RRP1B;FOXO3;PTMS;LATS1;MLLT11;AHI1;ING5;RPS6KA3;BAG4;LATS2;AKT1S1;BNIP1;EP400;TRIM35;FAS;FLNA;TNFRSF8;RICTOR;PAK2
Regulation Of Transcription By RNA Polymerase II (GO:0006357)	349	0.123564	0.645259	0	0	1.20577	2.52126	ZNF771;CSRNP2;ZBTB26;HNRNPU;ELK1;MED17;PTMS;RPS6KA3;CREB3L2;NFATC2IP;PITX1;ZNF641;ACTR2;ZBTB39;ZNF281;LMO7;OXSR1;PPRC1;PIAS2;PIAS1;RUNX1;ELF2;TBL1XR1;SUB1;ZNF438;ZNF675;KDM7A;ZNF672;SMARCD1;ENY2;NOTCH1;UHRF1;AEBP1;FOXO3;MACROH2A1;SLC9A1;ZBTB2;PLAGL2;CAMTA2;SUDS3;MTA2;HEXIM1;ZBTB17;CBX2;INO80;RRP1B;USF1;AHI1;AGO1;HDGF;ZNF337;CDK12;NFE2L1
Positive Regulation Of Signal Transduction (GO:0009967)	350	0.126399	0.645259	0	0	1.65798	3.42922	ING5;TRAF7;IRS1;ULK3;FLNA;FAS;ILK;CD226
Regulation Of Mitotic Cell Cycle Phase Transition (GO:1901990)	351	0.12801	0.645259	0	0	1.9538	4.01633	SMARCD1;CENPF;CDK6;CDC6;INO80
Regulation Of Cellular Response To Transforming Growth Factor Beta Stimulus (GO:1903844)	352	0.128564	0.645259	0	0	3.50809	7.19625	LATS1;LATS2
DNA Modification (GO:0006304)	353	0.128564	0.645259	0	0	3.50809	7.19625	NEIL2;NTHL1
Alpha-Amino Acid Metabolic Process (GO:1901605)	354	0.128564	0.645259	0	0	3.50809	7.19625	ALDH6A1;MTHFD1
Regulation Of Supramolecular Fiber Organization (GO:1902903)	355	0.128564	0.645259	0	0	3.50809	7.19625	AKAP13;AEBP1
Embryonic Heart Tube Morphogenesis (GO:0003143)	356	0.128564	0.645259	0	0	3.50809	7.19625	AHI1;NOTCH1
Heme Biosynthetic Process (GO:0006783)	357	0.128564	0.645259	0	0	3.50809	7.19625	FECH;NFE2L1
Inorganic Anion Transport (GO:0015698)	358	0.128564	0.645259	0	0	3.50809	7.19625	SLC25A10;XPR1
Maintenance Of Protein Localization In Organelle (GO:0072595)	359	0.128564	0.645259	0	0	3.50809	7.19625	HNRNPU;HK2
Positive Regulation Of Biomineral Tissue Development (GO:0070169)	360	0.128564	0.645259	0	0	3.50809	7.19625	FBXO5;OXSR1
Calcium Ion Transmembrane Transport (GO:0070588)	361	0.129265	0.645259	0	0	2.54278	5.20225	TRPM2;CACNB3;SLC35G1
Histone Deacetylation (GO:0016575)	362	0.129265	0.645259	0	0	2.54278	5.20225	TBL1XR1;SUDS3;MTA2
Positive Regulation Of MAP Kinase Activity (GO:0043406)	363	0.129265	0.645259	0	0	2.54278	5.20225	RASGRP1;MAP3K4;FGFR1
Positive Regulation Of Telomere Maintenance Via Telomere Lengthening (GO:1904358)	364	0.129265	0.645259	0	0	2.54278	5.20225	PNKP;MAP3K4;ATR
Regulation Of Cell Growth (GO:0001558)	365	0.131859	0.645259	0	0	1.58604	3.21335	RPS6KA3;ING5;DDX49;SGK3;RICTOR;CHPT1;INO80;RAB33B;EIF4G1
Protein Autophosphorylation (GO:0046777)	366	0.136564	0.645259	0	0	1.69121	3.36714	SMG1;ULK3;CDK12;OXSR1;PAK2;ATR;FGFR1
Response To Unfolded Protein (GO:0006986)	367	0.138291	0.645259	0	0	2.45778	4.86246	ERP44;HSPH1;RHBDD1
Glycoprotein Metabolic Process (GO:0009100)	368	0.138291	0.645259	0	0	2.45778	4.86246	ERP44;ST8SIA4;FBXO44
Glycosaminoglycan Biosynthetic Process (GO:0006024)	369	0.138291	0.645259	0	0	2.45778	4.86246	CHSY1;DSE;CHST14
Negative Regulation Of Transferase Activity (GO:0051348)	370	0.138291	0.645259	0	0	2.45778	4.86246	PNKP;HNRNPU;FBXO5
Negative Regulation Of Apoptotic Process (GO:0043066)	371	0.140902	0.645259	0	0	1.39442	2.73263	GRN;NOTCH1;RHBDD1;DHCR24;OXSR1;PTMS;AHI1;RPS6KA3;BAG4;LAMP3;BNIP1;FAS;FLNA;RICTOR;PAK2
Regulation Of Double-Strand Break Repair Via Nonhomologous End Joining (GO:2001032)	372	0.14209	0.645259	0	0	3.27389	6.38832	KMT5C;PNKP
Retrograde Protein Transport, ER To Cytosol (GO:0030970)	373	0.14209	0.645259	0	0	3.27389	6.38832	RHBDD1;FAF2
Negative Regulation Of DNA-templated Transcription, Elongation (GO:0032785)	374	0.14209	0.645259	0	0	3.27389	6.38832	HEXIM1;HNRNPU
Negative Regulation Of Osteoblast Differentiation (GO:0045668)	375	0.14209	0.645259	0	0	3.27389	6.38832	NOTCH1;CDK6
Negative Regulation Of Protein Localization To Nucleus (GO:1900181)	376	0.14209	0.645259	0	0	3.27389	6.38832	LATS1;LATS2
Negative Regulation Of Ubiquitin-Protein Transferase Activity (GO:0051444)	377	0.14209	0.645259	0	0	3.27389	6.38832	USP44;FBXO5
Phospholipid Dephosphorylation (GO:0046839)	378	0.14209	0.645259	0	0	3.27389	6.38832	PLPP5;SYNJ2
Positive Regulation Of Cell Junction Assembly (GO:1901890)	379	0.14209	0.645259	0	0	3.27389	6.38832	TSC1;THY1
Positive Regulation Of Nitrogen Compound Metabolic Process (GO:0051173)	380	0.14209	0.645259	0	0	3.27389	6.38832	UHRF1;EIF4G1
Regulation Of Actin Filament Bundle Assembly (GO:0032231)	381	0.14209	0.645259	0	0	3.27389	6.38832	TSC1;SLC9A1
Regulation Of Actin Polymerization Or Depolymerization (GO:0008064)	382	0.14209	0.645259	0	0	3.27389	6.38832	LATS1;PLEKHG2
Cilium Assembly (GO:0060271)	383	0.143687	0.645259	0	0	1.55229	3.01162	PLK4;AHI1;ACTR2;EHD4;NOTCH1;IFT81;IFT140;TMEM237;FLNA
Regulation Of Protein Metabolic Process (GO:0051246)	384	0.145906	0.645259	0	0	1.86443	3.58863	UHRF1;TSC1;FOXO3;LDLR;EIF4G1
Regulation Of Transcription Elongation By RNA Polymerase II (GO:0034243)	385	0.145906	0.645259	0	0	1.86443	3.58863	HEXIM1;HNRNPU;CDK12;INTS9;MED17
Regulation Of Focal Adhesion Assembly (GO:0051893)	386	0.147523	0.645259	0	0	2.37826	4.55143	TSC1;THY1;SLC9A1
Regulation Of Mitotic Nuclear Division (GO:0007088)	387	0.147523	0.645259	0	0	2.37826	4.55143	USP44;FBXO5;CDK5RAP2
Regulation Of Stem Cell Differentiation (GO:2000736)	388	0.147523	0.645259	0	0	2.37826	4.55143	NOTCH1;HNRNPU;MTA2
Central Nervous System Development (GO:0007417)	389	0.147668	0.645259	0	0	1.59032	3.04195	RPS6KA3;AHI1;RNF103;APLP1;SYNJ2;GIT1;PTS;CDK5RAP2
Regulation Of Defense Response To Bacterium (GO:1900424)	390	0.148055	0.645259	0	0	8.17445	15.6146	GRN
Regulation Of Extracellular Matrix Assembly (GO:1901201)	391	0.148055	0.645259	0	0	8.17445	15.6146	NOTCH1
Regulation Of Fibrinolysis (GO:0051917)	392	0.148055	0.645259	0	0	8.17445	15.6146	USF1
MyD88-independent Toll-Like Receptor Signaling Pathway (GO:0002756)	393	0.148055	0.645259	0	0	8.17445	15.6146	TICAM1
T-helper 1 Cell Differentiation (GO:0045063)	394	0.148055	0.645259	0	0	8.17445	15.6146	SPN
TORC2 Signaling (GO:0038203)	395	0.148055	0.645259	0	0	8.17445	15.6146	RICTOR
TRIF-dependent Toll-Like Receptor Signaling Pathway (GO:0035666)	396	0.148055	0.645259	0	0	8.17445	15.6146	TICAM1
Regulation Of Interleukin-23 Production (GO:0032667)	397	0.148055	0.645259	0	0	8.17445	15.6146	IL17RA
Actin Crosslink Formation (GO:0051764)	398	0.148055	0.645259	0	0	8.17445	15.6146	FLNA
Regulation Of mRNA Binding (GO:1902415)	399	0.148055	0.645259	0	0	8.17445	15.6146	LARP6
Regulation Of Nephron Tubule Epithelial Cell Differentiation (GO:0072182)	400	0.148055	0.645259	0	0	8.17445	15.6146	OXSR1
Astrocyte Activation (GO:0048143)	401	0.148055	0.645259	0	0	8.17445	15.6146	GRN
Axo-Dendritic Transport (GO:0008088)	402	0.148055	0.645259	0	0	8.17445	15.6146	SPG11
Blood Coagulation, Fibrin Clot Formation (GO:0072378)	403	0.148055	0.645259	0	0	8.17445	15.6146	FLNA
Blood Coagulation, Intrinsic Pathway (GO:0007597)	404	0.148055	0.645259	0	0	8.17445	15.6146	FLNA
Bradykinin Catabolic Process (GO:0010815)	405	0.148055	0.645259	0	0	8.17445	15.6146	IDE
Regulation Of Post-Transcriptional Gene Silencing By RNA (GO:1900368)	406	0.148055	0.645259	0	0	8.17445	15.6146	XPO5
Regulation Of pro-B Cell Differentiation (GO:2000973)	407	0.148055	0.645259	0	0	8.17445	15.6146	NOTCH1
Cardiac Muscle Cell Myoblast Differentiation (GO:0060379)	408	0.148055	0.645259	0	0	8.17445	15.6146	NOTCH1
Cardioblast Differentiation (GO:0010002)	409	0.148055	0.645259	0	0	8.17445	15.6146	NOTCH1
Regulation Of Response To Stress (GO:0080134)	410	0.148055	0.645259	0	0	8.17445	15.6146	EIF4G1
Cellular Response To Epinephrine Stimulus (GO:0071872)	411	0.148055	0.645259	0	0	8.17445	15.6146	SLC9A1
Response To Epinephrine (GO:0071871)	412	0.148055	0.645259	0	0	8.17445	15.6146	SLC9A1
Dicarboxylic Acid Biosynthetic Process (GO:0043650)	413	0.148055	0.645259	0	0	8.17445	15.6146	MTHFD1
Embryonic Forelimb Morphogenesis (GO:0035115)	414	0.148055	0.645259	0	0	8.17445	15.6146	OXSR1
Sodium Ion Import Across Plasma Membrane (GO:0098719)	415	0.148055	0.645259	0	0	8.17445	15.6146	SLC9A1
Epithelial To Mesenchymal Transition Involved In Endocardial Cushion Formation (GO:0003198)	416	0.148055	0.645259	0	0	8.17445	15.6146	NOTCH1
Eye Photoreceptor Cell Development (GO:0042462)	417	0.148055	0.645259	0	0	8.17445	15.6146	THY1
Forelimb Morphogenesis (GO:0035136)	418	0.148055	0.645259	0	0	8.17445	15.6146	OXSR1
Glycine Metabolic Process (GO:0006544)	419	0.148055	0.645259	0	0	8.17445	15.6146	GCSH
Urogenital System Development (GO:0001655)	420	0.148055	0.645259	0	0	8.17445	15.6146	OXSR1
Vacuole Organization (GO:0007033)	421	0.148055	0.645259	0	0	8.17445	15.6146	SPG11
Ventricular Trabecula Myocardium Morphogenesis (GO:0003222)	422	0.148055	0.645259	0	0	8.17445	15.6146	NOTCH1
Hematopoietic Stem Cell Proliferation (GO:0071425)	423	0.148055	0.645259	0	0	8.17445	15.6146	RUNX1
interleukin-17A-mediated Signaling Pathway (GO:0038173)	424	0.148055	0.645259	0	0	8.17445	15.6146	IL17RA
Intestinal Lipid Absorption (GO:0098856)	425	0.148055	0.645259	0	0	8.17445	15.6146	LDLR
Lymphocyte Apoptotic Process (GO:0070227)	426	0.148055	0.645259	0	0	8.17445	15.6146	CASP7
Mammary Gland Development (GO:0030879)	427	0.148055	0.645259	0	0	8.17445	15.6146	GPAT4
Mammary Gland Epithelium Development (GO:0061180)	428	0.148055	0.645259	0	0	8.17445	15.6146	LATS1
Monocyte Differentiation (GO:0030224)	429	0.148055	0.645259	0	0	8.17445	15.6146	PDE1B
Morphogenesis Of An Epithelial Sheet (GO:0002011)	430	0.148055	0.645259	0	0	8.17445	15.6146	NOTCH1
Multi-Ciliated Epithelial Cell Differentiation (GO:1903251)	431	0.148055	0.645259	0	0	8.17445	15.6146	PLK4
Muscle Tissue Morphogenesis (GO:0060415)	432	0.148055	0.645259	0	0	8.17445	15.6146	NOTCH1
Negative Regulation Of Bone Mineralization (GO:0030502)	433	0.148055	0.645259	0	0	8.17445	15.6146	RFLNA
Negative Regulation Of Bone Remodeling (GO:0046851)	434	0.148055	0.645259	0	0	8.17445	15.6146	GPR137
Negative Regulation Of Bone Resorption (GO:0045779)	435	0.148055	0.645259	0	0	8.17445	15.6146	GPR137
Negative Regulation Of Cell-Cell Adhesion Mediated By Cadherin (GO:2000048)	436	0.148055	0.645259	0	0	8.17445	15.6146	NOTCH1
Negative Regulation Of Cytokine Production Involved In Immune Response (GO:0002719)	437	0.148055	0.645259	0	0	8.17445	15.6146	CUEDC2
Negative Regulation Of Meiotic Nuclear Division (GO:0045835)	438	0.148055	0.645259	0	0	8.17445	15.6146	FBXO5
Negative Regulation Of Nuclear-Transcribed mRNA Catabolic Process, Nonsense-Mediated Decay (GO:2000623)	439	0.148055	0.645259	0	0	8.17445	15.6146	NBAS
Negative Regulation Of Oligodendrocyte Differentiation (GO:0048715)	440	0.148055	0.645259	0	0	8.17445	15.6146	NOTCH1
Negative Regulation Of Potassium Ion Transmembrane Transporter Activity (GO:1901017)	441	0.148055	0.645259	0	0	8.17445	15.6146	OXSR1
Nicotinamide Nucleotide Biosynthetic Process (GO:0019359)	442	0.148055	0.645259	0	0	8.17445	15.6146	QPRT
Nucleotide-Excision Repair, DNA Gap Filling (GO:0006297)	443	0.148055	0.645259	0	0	8.17445	15.6146	POLE
Peripheral Nervous System Neuron Development (GO:0048935)	444	0.148055	0.645259	0	0	8.17445	15.6146	RUNX1
Positive Regulation Of T Cell Chemotaxis (GO:0010820)	445	0.148055	0.645259	0	0	8.17445	15.6146	OXSR1
Positive Regulation Of Astrocyte Differentiation (GO:0048711)	446	0.148055	0.645259	0	0	8.17445	15.6146	NOTCH1
Positive Regulation Of Autophagy Of Mitochondrion In Response To Mitochondrial Depolarization (GO:1904925)	447	0.148055	0.645259	0	0	8.17445	15.6146	HK2
Positive Regulation Of Cardiac Epithelial To Mesenchymal Transition (GO:0062043)	448	0.148055	0.645259	0	0	8.17445	15.6146	NOTCH1
Positive Regulation Of Cardiac Muscle Cell Proliferation (GO:0060045)	449	0.148055	0.645259	0	0	8.17445	15.6146	NOTCH1
Positive Regulation Of Cardiac Muscle Tissue Growth (GO:0055023)	450	0.148055	0.645259	0	0	8.17445	15.6146	NOTCH1
Positive Regulation Of Cellular Extravasation (GO:0002693)	451	0.148055	0.645259	0	0	8.17445	15.6146	THY1
Positive Regulation Of Dendritic Cell Cytokine Production (GO:0002732)	452	0.148055	0.645259	0	0	8.17445	15.6146	TICAM1
Positive Regulation Of Heterotypic Cell-Cell Adhesion (GO:0034116)	453	0.148055	0.645259	0	0	8.17445	15.6146	THY1
Positive Regulation Of Integrin-Mediated Signaling Pathway (GO:2001046)	454	0.148055	0.645259	0	0	8.17445	15.6146	FLNA
Positive Regulation Of Lipase Activity (GO:0060193)	455	0.148055	0.645259	0	0	8.17445	15.6146	FGFR1
Positive Regulation Of Pyruvate Dehydrogenase Activity (GO:1904184)	456	0.148055	0.645259	0	0	8.17445	15.6146	PDPR
Protein Activation Cascade (GO:0072376)	457	0.148055	0.645259	0	0	8.17445	15.6146	FLNA
Protein Localization To Non-Motile Cilium (GO:0097499)	458	0.148055	0.645259	0	0	8.17445	15.6146	SPATA7
Protein Modification By Small Protein Conjugation Or Removal (GO:0070647)	459	0.148055	0.645259	0	0	8.17445	15.6146	UBA6
Regulation Of DNA-templated Transcription In Response To Stress (GO:0043620)	460	0.148055	0.645259	0	0	8.17445	15.6146	RPS6KA3
Regulation Of T Cell Chemotaxis (GO:0010819)	461	0.148055	0.645259	0	0	8.17445	15.6146	OXSR1
Regulation Of Cardiac Muscle Cell Membrane Repolarization (GO:0099623)	462	0.148055	0.645259	0	0	8.17445	15.6146	FLNA
Regulation Of Catecholamine Secretion (GO:0050433)	463	0.148055	0.645259	0	0	8.17445	15.6146	DTNBP1
ERAD Pathway (GO:0036503)	464	0.152098	0.645259	0	0	1.83641	3.45838	RNF103;RHBDD1;FAF2;UBE2J2;FBXO44
Regulation Of MAPK Cascade (GO:0043408)	465	0.152764	0.645259	0	0	1.71781	3.22752	TRAF7;FAS;ZDHHC17;PAK2;RASGRP1;FGFR1
G1/S Transition Of Mitotic Cell Cycle (GO:0000082)	466	0.153775	0.645259	0	0	2.00748	3.75853	LATS1;LATS2;CDK6;POLE
Axon Guidance (GO:0007411)	467	0.153775	0.645259	0	0	2.00748	3.75853	ROBO3;SEMA4A;NOTCH1;PLXNA1
Cellular Response To Molecule Of Bacterial Origin (GO:0071219)	468	0.153775	0.645259	0	0	2.00748	3.75853	CASP7;TRIM41;TICAM1;GIT1
Regulation Of Centriole Replication (GO:0046599)	469	0.155899	0.645259	0	0	3.06897	5.70381	PLK4;CDK5RAP2
Cardiac Muscle Tissue Development (GO:0048738)	470	0.155899	0.645259	0	0	3.06897	5.70381	AKAP13;NOTCH1
Rescue Of Stalled Ribosome (GO:0072344)	471	0.155899	0.645259	0	0	3.06897	5.70381	USP10;ZNF598
Synaptic Vesicle Recycling (GO:0036465)	472	0.155899	0.645259	0	0	3.06897	5.70381	SYNJ2;GIT1
Lipid Droplet Organization (GO:0034389)	473	0.155899	0.645259	0	0	3.06897	5.70381	SQLE;FAF2
Phosphatidylinositol 3-Kinase Signaling (GO:0014065)	474	0.155899	0.645259	0	0	3.06897	5.70381	IRS1;PIK3C2A
Porphyrin-Containing Compound Biosynthetic Process (GO:0006779)	475	0.155899	0.645259	0	0	3.06897	5.70381	FECH;NFE2L1
Positive Regulation Of Cilium Assembly (GO:0045724)	476	0.155899	0.645259	0	0	3.06897	5.70381	KCTD17;MARK4
mRNA 3'-End Processing (GO:0031124)	477	0.156949	0.645259	0	0	2.3037	4.26608	HEXIM1;CSTF2T;MTPAP
Telomere Maintenance (GO:0000723)	478	0.16129	0.645259	0	0	1.96713	3.58913	NSMCE2;XRCC3;INO80;ATR
Regulation Of DNA-templated Transcription (GO:0006355)	479	0.162774	0.645259	0	0	1.17656	2.13591	ZNF771;SETD5;CSRNP2;ILK;ELK1;MED17;ING5;RPS6KA3;EDRF1;CREB3L2;PITX1;CDK5RAP2;PRMT6;ZNF281;KCTD1;OXSR1;PIAS2;PIAS1;RUNX1;ELF2;ZNF92;TBL1XR1;KAT6A;SUB1;ZNF714;ZNF438;AJUBA;ZNF675;KDM7A;ZNF672;SMARCD1;ENY2;NOTCH1;ZNF273;FOXO3;ZNF628;EP400;METTL4;PLAGL2;CAMTA2;SUDS3;MTA2;ZNF664;HEXIM1;ZBTB14;FOXN3;INO80;USF1;MLLT11;CENPF;NFE2L1
Chromatin Organization (GO:0006325)	480	0.163532	0.645259	0	0	1.43597	2.60018	ING5;SMARCD1;CDAN1;CHAF1A;DDX11;C6ORF89;HNRNPU;HDGF;INO80;SUDS3;MTA2
Regulation Of Cell Differentiation (GO:0045595)	481	0.165902	0.645259	0	0	1.59629	2.8675	RPS6KA3;SMARCD1;CDK6;MTA2;CDK5RAP2;RUNX1;FGFR1
Regulation Of Telomere Maintenance (GO:0032204)	482	0.166555	0.645259	0	0	2.23367	4.0037	SMG1;NSMCE2;YLPM1
Histone H4 Acetylation (GO:0043967)	483	0.166555	0.645259	0	0	2.23367	4.0037	ING5;NAA40;EP400
Phosphatidylinositol-Mediated Signaling (GO:0048015)	484	0.166555	0.645259	0	0	2.23367	4.0037	IRS1;PIK3C2A;FGFR1
Protein Sumoylation (GO:0016925)	485	0.166555	0.645259	0	0	2.23367	4.0037	NSMCE2;PIAS2;PIAS1
RNA-mediated Gene Silencing (GO:0031047)	486	0.169949	0.645259	0	0	2.88815	5.11855	HEXIM1;AGO1
Regulation Of Protein Polymerization (GO:0032271)	487	0.169949	0.645259	0	0	2.88815	5.11855	LATS1;PLEKHG2
Cellular Response To Glucose Stimulus (GO:0071333)	488	0.169949	0.645259	0	0	2.88815	5.11855	UNC13B;PTPRN2
Mitotic Sister Chromatid Cohesion (GO:0007064)	489	0.169949	0.645259	0	0	2.88815	5.11855	HASPIN;SMC3
Positive Regulation Of Lymphocyte Activation (GO:0051251)	490	0.169949	0.645259	0	0	2.88815	5.11855	THY1;TICAM1
Postreplication Repair (GO:0006301)	491	0.169949	0.645259	0	0	2.88815	5.11855	USP10;POLI
Regulation Of Signal Transduction (GO:0009966)	492	0.171047	0.645259	0	0	1.58148	2.79261	IFT81;TMEM237;ZFAND2B;DTNBP1;ILK;ZDHHC17;GIT1
Regulation Of Double-Strand Break Repair (GO:2000779)	493	0.171312	0.645259	0	0	1.75718	3.10014	ACTR2;SMARCD1;DDX11;EP400;ATR
Protein Localization (GO:0008104)	494	0.174021	0.645259	0	0	1.37131	2.39784	C17ORF75;COG7;LRBA;NBEAL2;HPS6;ARCN1;TM9SF1;AHI1;CDAN1;AKAP11;STX6;FLNA;TLK1
Proteasome-Mediated Ubiquitin-Dependent Protein Catabolic Process (GO:0043161)	495	0.176223	0.645259	0	0	1.35025	2.34404	USP44;FAF2;ZFAND2B;UBE2J2;FBXO44;ANKRD9;ZNRF2;RNF103;TBL1XR1;FEM1C;RBCK1;KCTD17;FBXL4;ZNF598
Synapse Organization (GO:0050808)	496	0.176328	0.645259	0	0	2.16776	3.76194	UNC13B;CACNB3;GPHN
Positive Regulation Of TOR Signaling (GO:0032008)	497	0.176328	0.645259	0	0	2.16776	3.76194	GPR137;RICTOR;TELO2
Spindle Assembly (GO:0051225)	498	0.176708	0.645259	0	0	1.89109	3.27775	FLNA;HAUS6;INO80;SMC3
Protein Localization To Plasma Membrane (GO:0072659)	499	0.177917	0.645259	0	0	1.73225	2.99063	CACNB3;EHD4;SLMAP;FLNA;TTC7A
ATP Synthesis Coupled Electron Transport (GO:0042773)	500	0.181516	0.645259	0	0	6.13022	10.4607	NDUFV3
DNA Replication-Dependent Chromatin Assembly (GO:0006335)	501	0.181516	0.645259	0	0	6.13022	10.4607	CHAF1A
Regulation Of Gastrulation (GO:0010470)	502	0.181516	0.645259	0	0	6.13022	10.4607	OXSR1
Regulation Of Glial Cell Proliferation (GO:0060251)	503	0.181516	0.645259	0	0	6.13022	10.4607	NOTCH1
Notch Signaling Involved In Heart Development (GO:0061314)	504	0.181516	0.645259	0	0	6.13022	10.4607	NOTCH1
R-loop Processing (GO:0062176)	505	0.181516	0.645259	0	0	6.13022	10.4607	DDX23
Regulation Of Heme Biosynthetic Process (GO:0070453)	506	0.181516	0.645259	0	0	6.13022	10.4607	SRRD
Regulation Of Low-Density Lipoprotein Particle Clearance (GO:0010988)	507	0.181516	0.645259	0	0	6.13022	10.4607	LDLR
Adrenergic Receptor Signaling Pathway (GO:0071875)	508	0.181516	0.645259	0	0	6.13022	10.4607	AKAP13
Alpha-Amino Acid Biosynthetic Process (GO:1901607)	509	0.181516	0.645259	0	0	6.13022	10.4607	MTHFD1
Aminophospholipid Transport (GO:0015917)	510	0.181516	0.645259	0	0	6.13022	10.4607	ATP8A1
Regulation Of Mitochondrial Depolarization (GO:0051900)	511	0.181516	0.645259	0	0	6.13022	10.4607	MLLT11
Aspartate Family Amino Acid Biosynthetic Process (GO:0009067)	512	0.181516	0.645259	0	0	6.13022	10.4607	MTHFD1
Bone Resorption (GO:0045453)	513	0.181516	0.645259	0	0	6.13022	10.4607	ZNF675
Cap-Dependent Translational Initiation (GO:0002191)	514	0.181516	0.645259	0	0	6.13022	10.4607	EIF4G1
Cardiac Left Ventricle Morphogenesis (GO:0003214)	515	0.181516	0.645259	0	0	6.13022	10.4607	NOTCH1
Regulation Of Pyruvate Dehydrogenase Activity (GO:1904182)	516	0.181516	0.645259	0	0	6.13022	10.4607	PDPR
Regulation Of Secretion (GO:0051046)	517	0.181516	0.645259	0	0	6.13022	10.4607	PTPRN2
Cellular Response To Acidic pH (GO:0071468)	518	0.181516	0.645259	0	0	6.13022	10.4607	SLC9A1
Cellular Response To Fatty Acid (GO:0071398)	519	0.181516	0.645259	0	0	6.13022	10.4607	IRS1
Regulation Of Stress Granule Assembly (GO:0062028)	520	0.181516	0.645259	0	0	6.13022	10.4607	USP10
Cellular Response To Hydroxyurea (GO:0072711)	521	0.181516	0.645259	0	0	6.13022	10.4607	DDX11
Cellular Response To Interferon-Alpha (GO:0035457)	522	0.181516	0.645259	0	0	6.13022	10.4607	PDE12
Regulation Of Translation In Response To Endoplasmic Reticulum Stress (GO:0036490)	523	0.181516	0.645259	0	0	6.13022	10.4607	EIF4G1
Cellular Response To Oxidised Low-Density Lipoprotein Particle Stimulus (GO:0140052)	524	0.181516	0.645259	0	0	6.13022	10.4607	TICAM1
Double-Strand Break Repair Via Synthesis-Dependent Strand Annealing (GO:0045003)	525	0.181516	0.645259	0	0	6.13022	10.4607	XRCC3
snRNA Modification (GO:0040031)	526	0.181516	0.645259	0	0	6.13022	10.4607	METTL4
Store-Operated Calcium Entry (GO:0002115)	527	0.181516	0.645259	0	0	6.13022	10.4607	ORAI2
succinyl-CoA Catabolic Process (GO:1901289)	528	0.181516	0.645259	0	0	6.13022	10.4607	NUDT8
Sulfate Transport (GO:0008272)	529	0.181516	0.645259	0	0	6.13022	10.4607	SLC25A10
tRNA Aminoacylation For Mitochondrial Protein Translation (GO:0070127)	530	0.181516	0.645259	0	0	6.13022	10.4607	YARS2
tRNA Pseudouridine Synthesis (GO:0031119)	531	0.181516	0.645259	0	0	6.13022	10.4607	PUS3
Glutathione Biosynthetic Process (GO:0006750)	532	0.181516	0.645259	0	0	6.13022	10.4607	GGT1
Insulin Secretion Involved In Cellular Response To Glucose Stimulus (GO:0035773)	533	0.181516	0.645259	0	0	6.13022	10.4607	PTPRN2
Leukotriene Biosynthetic Process (GO:0019370)	534	0.181516	0.645259	0	0	6.13022	10.4607	GGT1
Macrophage Activation Involved In Immune Response (GO:0002281)	535	0.181516	0.645259	0	0	6.13022	10.4607	GRN
Maintenance Of DNA Repeat Elements (GO:0043570)	536	0.181516	0.645259	0	0	6.13022	10.4607	MSH3
Microglial Cell Activation (GO:0001774)	537	0.181516	0.645259	0	0	6.13022	10.4607	GRN
Negative Regulation Of PERK-mediated Unfolded Protein Response (GO:1903898)	538	0.181516	0.645259	0	0	6.13022	10.4607	PPP1R15B
Negative Regulation Of Alpha-Beta T Cell Proliferation (GO:0046642)	539	0.181516	0.645259	0	0	6.13022	10.4607	TWSG1
Negative Regulation Of Chondrocyte Differentiation (GO:0032331)	540	0.181516	0.645259	0	0	6.13022	10.4607	RFLNA
Negative Regulation Of Execution Phase Of Apoptosis (GO:1900118)	541	0.181516	0.645259	0	0	6.13022	10.4607	PAK2
Negative Regulation Of Exocytosis (GO:0045920)	542	0.181516	0.645259	0	0	6.13022	10.4607	RAB33B
Negative Regulation Of Gene Expression Via CpG Island Methylation (GO:0044027)	543	0.181516	0.645259	0	0	6.13022	10.4607	UHRF1
Negative Regulation Of Glial Cell Differentiation (GO:0045686)	544	0.181516	0.645259	0	0	6.13022	10.4607	NOTCH1
Negative Regulation Of Glial Cell Proliferation (GO:0060253)	545	0.181516	0.645259	0	0	6.13022	10.4607	NOTCH1
Negative Regulation Of Leukocyte Activation (GO:0002695)	546	0.181516	0.645259	0	0	6.13022	10.4607	GRN
Negative Regulation Of Muscle Hypertrophy (GO:0014741)	547	0.181516	0.645259	0	0	6.13022	10.4607	NOTCH1
Negative Regulation Of Myoblast Differentiation (GO:0045662)	548	0.181516	0.645259	0	0	6.13022	10.4607	NOTCH1
Negative Regulation Of Neuron Projection Regeneration (GO:0070571)	549	0.181516	0.645259	0	0	6.13022	10.4607	THY1
Negative Regulation Of Protein-Containing Complex Disassembly (GO:0043242)	550	0.181516	0.645259	0	0	6.13022	10.4607	PHF23
Negative Regulation Of Sodium Ion Transmembrane Transport (GO:1902306)	551	0.181516	0.645259	0	0	6.13022	10.4607	OXSR1
Negative Regulation Of Sodium Ion Transmembrane Transporter Activity (GO:2000650)	552	0.181516	0.645259	0	0	6.13022	10.4607	OXSR1
Nucleoside Metabolic Process (GO:0009116)	553	0.181516	0.645259	0	0	6.13022	10.4607	MACROD1
Outer Dynein Arm Assembly (GO:0036158)	554	0.181516	0.645259	0	0	6.13022	10.4607	LRRC61
Peptide Cross-Linking (GO:0018149)	555	0.181516	0.645259	0	0	6.13022	10.4607	FGFR1
Positive Regulation Of CD8-positive, Alpha-Beta T Cell Activation (GO:2001187)	556	0.181516	0.645259	0	0	6.13022	10.4607	RUNX1
Positive Regulation Of RNA Binding (GO:1905216)	557	0.181516	0.645259	0	0	6.13022	10.4607	LARP6
Positive Regulation Of Aspartic-Type Peptidase Activity (GO:1905247)	558	0.181516	0.645259	0	0	6.13022	10.4607	GRN
Positive Regulation Of Brown Fat Cell Differentiation (GO:0090336)	559	0.181516	0.645259	0	0	6.13022	10.4607	HNRNPU
Positive Regulation Of Cell Migration Involved In Sprouting Angiogenesis (GO:0090050)	560	0.181516	0.645259	0	0	6.13022	10.4607	PIK3C2A
Positive Regulation Of Fatty Acid Beta-Oxidation (GO:0032000)	561	0.181516	0.645259	0	0	6.13022	10.4607	IRS1
Positive Regulation Of Glycogen Biosynthetic Process (GO:0045725)	562	0.181516	0.645259	0	0	6.13022	10.4607	IRS1
Positive Regulation Of Granulocyte Differentiation (GO:0030854)	563	0.181516	0.645259	0	0	6.13022	10.4607	RUNX1
Positive Regulation Of Helicase Activity (GO:0051096)	564	0.181516	0.645259	0	0	6.13022	10.4607	MSH3
Positive Regulation Of Leukocyte Activation (GO:0002696)	565	0.181516	0.645259	0	0	6.13022	10.4607	CD226
Positive Regulation Of Microtubule Nucleation (GO:0090063)	566	0.181516	0.645259	0	0	6.13022	10.4607	GIT1
Positive Regulation Of Nuclear Cell Cycle DNA Replication (GO:0010571)	567	0.181516	0.645259	0	0	6.13022	10.4607	INO80
Positive Regulation Of Translation In Response To Stress (GO:0032056)	568	0.181516	0.645259	0	0	6.13022	10.4607	EIF4G1
Protein Localization To Ciliary Transition Zone (GO:1904491)	569	0.181516	0.645259	0	0	6.13022	10.4607	SPATA7
Purine-Containing Compound Metabolic Process (GO:0072521)	570	0.181516	0.645259	0	0	6.13022	10.4607	MACROD1
Pyrimidine Nucleobase Metabolic Process (GO:0006206)	571	0.181516	0.645259	0	0	6.13022	10.4607	CTPS1
Regulation Of Astrocyte Differentiation (GO:0048710)	572	0.181516	0.645259	0	0	6.13022	10.4607	NOTCH1
Regulation Of Centrosome Cycle (GO:0046605)	573	0.184198	0.645259	0	0	2.72742	4.6141	XRCC3;MARK4
Notch Signaling Pathway (GO:0007219)	574	0.184198	0.645259	0	0	2.72742	4.6141	TRAF7;NOTCH1
Regulation Of Telomere Capping (GO:1904353)	575	0.184198	0.645259	0	0	2.72742	4.6141	PNKP;MAP3K4
Response To Nutrient Levels (GO:0031667)	576	0.184198	0.645259	0	0	2.72742	4.6141	RICTOR;EIF4G1
Ribosomal Large Subunit Assembly (GO:0000027)	577	0.184198	0.645259	0	0	2.72742	4.6141	TRAF7;MRM2
Translesion Synthesis (GO:0019985)	578	0.184198	0.645259	0	0	2.72742	4.6141	USP10;POLI
Histone H2A Acetylation (GO:0043968)	579	0.184198	0.645259	0	0	2.72742	4.6141	NAA40;EP400
Platelet Dense Granule Organization (GO:0060155)	580	0.184198	0.645259	0	0	2.72742	4.6141	DTNBP1;HPS6
Positive Regulation Of Microtubule Polymerization (GO:0031116)	581	0.184198	0.645259	0	0	2.72742	4.6141	GIT1;CDK5RAP2
Regulation Of Cation Channel Activity (GO:2001257)	582	0.184198	0.645259	0	0	2.72742	4.6141	CACNB3;SLMAP
Positive Regulation Of Tumor Necrosis Factor Production (GO:0032760)	583	0.186256	0.645259	0	0	2.10561	3.53876	SPN;TNFRSF8;RASGRP1
Positive Regulation Of Nucleic Acid-Templated Transcription (GO:1903508)	584	0.18629	0.645259	0	0	1.28564	2.16045	ENY2;NOTCH1;ZNF281;ILK;INO80;FOXO3;ELK1;MED17;RUNX1;MLLT11;EDRF1;ELF2;TBL1XR1;KAT6A;CREB3L2;EP400;MTA2;CDK5RAP2
Modification-Dependent Protein Catabolic Process (GO:0019941)	585	0.186755	0.645259	0	0	1.44936	2.43197	HERC5;RNF144A;UBL4A;ANKIB1;UBA6;UHRF1;PCYOX1L;FEM1C;FBXL4
Regulation Of Gene Expression (GO:0010468)	586	0.188996	0.645259	0	0	1.20906	2.01433	DNMT1;ENY2;NOTCH1;ZNF273;ZBTB26;MACROH2A1;ZBTB2;ING5;ZC3H7B;ZNF628;LAMP3;METTL4;ZNF664;TCF19;ZBTB17;ZBTB39;SFMBT2;ZNF281;DTNBP1;FOXN3;OXSR1;RRP1B;TICAM1;CDK6;ZNF92;KAT6A;ZFP64;ZNF714;AJUBA;ZNF675
Glycerophospholipid Biosynthetic Process (GO:0046474)	587	0.191408	0.645259	0	0	1.68446	2.78499	PI4K2B;GPAT4;CHPT1;SYNJ2;PIK3C2A
Phosphatidylinositol Biosynthetic Process (GO:0006661)	588	0.191408	0.645259	0	0	1.68446	2.78499	PI4K2B;SMG1;TTC7A;SYNJ2;PIK3C2A
Hemopoiesis (GO:0030097)	589	0.192601	0.645259	0	0	1.82068	2.99891	ARMC6;KAT6A;EPOR;RUNX1
Macromolecule Modification (GO:0043412)	590	0.192601	0.645259	0	0	1.82068	2.99891	PRMT6;UBL4A;ICMT;ST8SIA4
Negative Regulation Of Transcription By RNA Polymerase II (GO:0000122)	591	0.19342	0.645259	0	0	1.24515	2.04564	HEXIM1;ZBTB17;ZBTB39;NOTCH1;UHRF1;CBX2;ZNF281;ZBTB26;HNRNPU;AEBP1;OXSR1;FOXO3;MACROH2A1;RUNX1;ZBTB2;TBL1XR1;HDGF;ZNF337;SUDS3;MTA2;ZNF675;ZNF641
Negative Regulation Of DNA-templated Transcription (GO:0045892)	592	0.195124	0.645259	0	0	1.20743	1.97308	NOTCH1;UHRF1;ZBTB26;HNRNPU;AEBP1;FOXO3;MACROH2A1;ZBTB2;FLNA;SUDS3;MTA2;ZNF641;HEXIM1;PRMT6;ZBTB17;ZBTB39;ZBTB14;CBX2;ZNF281;KCTD1;FOXN3;OXSR1;RUNX1;CENPF;TBL1XR1;KAT6A;HDGF;ZNF337;ZNF675
Calcium Ion Transport (GO:0006816)	593	0.196325	0.645259	0	0	2.04691	3.33234	TRPM2;CACNB3;ORAI2
Positive Regulation Of Tumor Necrosis Factor Superfamily Cytokine Production (GO:1903557)	594	0.196325	0.645259	0	0	2.04691	3.33234	SPN;TNFRSF8;RASGRP1
Regulation Of Protein Serine/Threonine Kinase Activity (GO:0071900)	595	0.198286	0.645259	0	0	1.66153	2.68842	HERC5;THY1;CDC6;CDK12;TELO2
Stem Cell Differentiation (GO:0048863)	596	0.19861	0.645259	0	0	2.58361	4.17618	ZNF281;OXSR1
mRNA Polyadenylation (GO:0006378)	597	0.19861	0.645259	0	0	2.58361	4.17618	HEXIM1;MTPAP
Proteasomal Protein Catabolic Process (GO:0010498)	598	0.200337	0.645259	0	0	1.39213	2.2382	ANKRD9;ZNRF2;TBL1XR1;RHBDD1;USP44;ZFAND2B;FEM1C;RBCK1;KCTD17;FBXO44
Positive Regulation Of Cellular Process (GO:0048522)	599	0.201462	0.645259	0	0	1.29892	2.08106	PABIR1;SMARCD1;GRN;DDX49;NOTCH1;IRS1;INO80;EPOR;RPS6KA3;C6ORF89;RICTOR;FBXO5;MARK4;EIF4G1;FGFR1
Response To Lipopolysaccharide (GO:0032496)	600	0.205248	0.645259	0	0	1.63921	2.59574	RPS6KA3;CASP7;TRIM41;TICAM1;GIT1
Regulation Of Multicellular Organismal Development (GO:2000026)	601	0.206524	0.645259	0	0	1.99139	3.1411	ING5;KAT6A;INO80
Regulation Of Osteoblast Differentiation (GO:0045667)	602	0.206524	0.645259	0	0	1.99139	3.1411	NOTCH1;CDK6;FBXO5
Positive Regulation Of Cell-Substrate Adhesion (GO:0010811)	603	0.206524	0.645259	0	0	1.99139	3.1411	CDK6;ILK;FLNA
DNA Metabolic Process (GO:0006259)	604	0.207096	0.645259	0	0	1.3193	2.07734	RMI1;KMT5C;PNKP;XRCC3;INO80;PTMS;DDB2;NTHL1;MSH3;EP400;POLI;POLE;ATR
Cellular Response To UV (GO:0034644)	605	0.208921	0.645259	0	0	1.7553	2.74846	RHBDD1;INO80;DDB2;ATR
Cellular Response To Lipopolysaccharide (GO:0071222)	606	0.208921	0.645259	0	0	1.7553	2.74846	CASP7;TRIM41;TICAM1;GIT1
Ubiquitin-Dependent ERAD Pathway (GO:0030433)	607	0.208921	0.645259	0	0	1.7553	2.74846	RNF103;FAF2;UBE2J2;FBXO44
Regulation Of Cell Cycle Process (GO:0010564)	608	0.21161	0.645259	0	0	1.53731	2.38746	SMARCD1;KLHL21;FBXO5;CEP85;MARK4;GIT1
Protein Localization To Cell Periphery (GO:1990778)	609	0.21229	0.645259	0	0	1.61747	2.50677	CACNB3;EHD4;SLMAP;FLNA;TTC7A
RNA Polyadenylation (GO:0043631)	610	0.21315	0.645259	0	0	2.45419	3.79358	HEXIM1;MTPAP
C4-dicarboxylate Transport (GO:0015740)	611	0.213666	0.645259	0	0	4.90369	7.56807	SLC25A10
Regulation Of Endothelial Cell Chemotaxis (GO:2001026)	612	0.213666	0.645259	0	0	4.90369	7.56807	NOTCH1
G Protein-Coupled Receptor Signaling Pathway, Coupled To Cyclic Nucleotide Second Messenger (GO:0007187)	613	0.213666	0.645259	0	0	4.90369	7.56807	DHX8
G-quadruplex DNA Unwinding (GO:0044806)	614	0.213666	0.645259	0	0	4.90369	7.56807	DDX11
Regulation Of Extracellular Matrix Constituent Secretion (GO:0003330)	615	0.213666	0.645259	0	0	4.90369	7.56807	NOTCH1
Regulation Of Generation Of Precursor Metabolites And Energy (GO:0043467)	616	0.213666	0.645259	0	0	4.90369	7.56807	NOA1
Regulation Of High Voltage-Gated Calcium Channel Activity (GO:1901841)	617	0.213666	0.645259	0	0	4.90369	7.56807	CACNB3
Regulation Of Insulin-Like Growth Factor Receptor Signaling Pathway (GO:0043567)	618	0.213666	0.645259	0	0	4.90369	7.56807	ZFAND2B
Regulation Of Macrophage Cytokine Production (GO:0010935)	619	0.213666	0.645259	0	0	4.90369	7.56807	CUEDC2
Regulation Of Mitochondrial mRNA Stability (GO:0044528)	620	0.213666	0.645259	0	0	4.90369	7.56807	PDE12
Astrocyte Development (GO:0014002)	621	0.213666	0.645259	0	0	4.90369	7.56807	CDK6
Regulation Of Protein ADP-ribosylation (GO:0010835)	622	0.213666	0.645259	0	0	4.90369	7.56807	PNKP
Carbohydrate Phosphorylation (GO:0046835)	623	0.213666	0.645259	0	0	4.90369	7.56807	HK2
Cell Junction Maintenance (GO:0034331)	624	0.213666	0.645259	0	0	4.90369	7.56807	PARD6A
Cell-Cell Junction Maintenance (GO:0045217)	625	0.213666	0.645259	0	0	4.90369	7.56807	PARD6A
Response To UV-C (GO:0010225)	626	0.213666	0.645259	0	0	4.90369	7.56807	MAP3K4
Response To Hydroxyurea (GO:0072710)	627	0.213666	0.645259	0	0	4.90369	7.56807	DDX11
Ribonucleoside Bisphosphate Catabolic Process (GO:0034031)	628	0.213666	0.645259	0	0	4.90369	7.56807	NUDT8
Ribosomal Small Subunit Export From Nucleus (GO:0000056)	629	0.213666	0.645259	0	0	4.90369	7.56807	RPS15
Ribosome-Associated Ubiquitin-Dependent Protein Catabolic Process (GO:1990116)	630	0.213666	0.645259	0	0	4.90369	7.56807	ZNF598
Dosage Compensation (GO:0007549)	631	0.213666	0.645259	0	0	4.90369	7.56807	HNRNPU
Skin Epidermis Development (GO:0098773)	632	0.213666	0.645259	0	0	4.90369	7.56807	FGFR1
Sodium Ion Export Across Plasma Membrane (GO:0036376)	633	0.213666	0.645259	0	0	4.90369	7.56807	SLC9A1
Establishment Of Mitotic Sister Chromatid Cohesion (GO:0034087)	634	0.213666	0.645259	0	0	4.90369	7.56807	SMC3
Establishment Of Skin Barrier (GO:0061436)	635	0.213666	0.645259	0	0	4.90369	7.56807	FGFR1
Ether Lipid Biosynthetic Process (GO:0008611)	636	0.213666	0.645259	0	0	4.90369	7.56807	CHPT1
Fructose 6-Phosphate Metabolic Process (GO:0006002)	637	0.213666	0.645259	0	0	4.90369	7.56807	HK2
Heparan Sulfate Proteoglycan Biosynthetic Process, Polysaccharide Chain Biosynthetic Process (GO:0015014)	638	0.213666	0.645259	0	0	4.90369	7.56807	HS2ST1
Heterocycle Biosynthetic Process (GO:0018130)	639	0.213666	0.645259	0	0	4.90369	7.56807	GPHN
Hexose Transmembrane Transport (GO:0008645)	640	0.213666	0.645259	0	0	4.90369	7.56807	SLC2A3
Histone H4-K12 Acetylation (GO:0043983)	641	0.213666	0.645259	0	0	4.90369	7.56807	ING5
Insulin Metabolic Process (GO:1901142)	642	0.213666	0.645259	0	0	4.90369	7.56807	IDE
Intracellular Sodium Ion Homeostasis (GO:0006883)	643	0.213666	0.645259	0	0	4.90369	7.56807	SLC9A1
Intraciliary Transport Involved In Cilium Assembly (GO:0035735)	644	0.213666	0.645259	0	0	4.90369	7.56807	IFT81
Lipid Droplet Formation (GO:0140042)	645	0.213666	0.645259	0	0	4.90369	7.56807	SQLE
Methionine Metabolic Process (GO:0006555)	646	0.213666	0.645259	0	0	4.90369	7.56807	MTHFD1
Morphogenesis Of A Polarized Epithelium (GO:0001738)	647	0.213666	0.645259	0	0	4.90369	7.56807	AHI1
Negative Regulation Of JUN Kinase Activity (GO:0043508)	648	0.213666	0.645259	0	0	4.90369	7.56807	ZNF675
Negative Regulation Of Alpha-Beta T Cell Differentiation (GO:0046639)	649	0.213666	0.645259	0	0	4.90369	7.56807	RUNX1
Negative Regulation Of Amyloid Fibril Formation (GO:1905907)	650	0.213666	0.645259	0	0	4.90369	7.56807	LDLR
Negative Regulation Of Axon Extension Involved In Axon Guidance (GO:0048843)	651	0.213666	0.645259	0	0	4.90369	7.56807	SEMA4A
Negative Regulation Of cAMP-mediated Signaling (GO:0043951)	652	0.213666	0.645259	0	0	4.90369	7.56807	MGRN1
Negative Regulation Of Centriole Replication (GO:0046600)	653	0.213666	0.645259	0	0	4.90369	7.56807	CDK5RAP2
Negative Regulation Of Extracellular Matrix Organization (GO:1903054)	654	0.213666	0.645259	0	0	4.90369	7.56807	NOTCH1
Negative Regulation Of Nitrogen Compound Metabolic Process (GO:0051172)	655	0.213666	0.645259	0	0	4.90369	7.56807	LDLR
Negative Regulation Of Peptide Hormone Secretion (GO:0090278)	656	0.213666	0.645259	0	0	4.90369	7.56807	IRS1
Negative Regulation Of Potassium Ion Transmembrane Transport (GO:1901380)	657	0.213666	0.645259	0	0	4.90369	7.56807	OXSR1
Negative Regulation Of Transporter Activity (GO:0032410)	658	0.213666	0.645259	0	0	4.90369	7.56807	OXSR1
Nonribosomal Peptide Biosynthetic Process (GO:0019184)	659	0.213666	0.645259	0	0	4.90369	7.56807	GGT1
Nucleolar Chromatin Organization (GO:1990700)	660	0.213666	0.645259	0	0	4.90369	7.56807	DDX11
Platelet-Derived Growth Factor Receptor Signaling Pathway (GO:0048008)	661	0.213666	0.645259	0	0	4.90369	7.56807	PIK3C2A
Positive Regulation Of Chromatin Binding (GO:0035563)	662	0.213666	0.645259	0	0	4.90369	7.56807	DDX11
Positive Regulation Of Endothelial Cell Chemotaxis (GO:2001028)	663	0.213666	0.645259	0	0	4.90369	7.56807	FGFR1
Positive Regulation Of Glycogen Metabolic Process (GO:0070875)	664	0.213666	0.645259	0	0	4.90369	7.56807	IRS1
Positive Regulation Of Lymphocyte Chemotaxis (GO:0140131)	665	0.213666	0.645259	0	0	4.90369	7.56807	OXSR1
Positive Regulation Of Myeloid Leukocyte Mediated Immunity (GO:0002888)	666	0.213666	0.645259	0	0	4.90369	7.56807	TICAM1
Positive Regulation Of Sodium Ion Transmembrane Transporter Activity (GO:2000651)	667	0.213666	0.645259	0	0	4.90369	7.56807	SLC9A1
Positive Regulation Of Synapse Assembly (GO:0051965)	668	0.213666	0.645259	0	0	4.90369	7.56807	SEMA4A
Positive Regulation Of Vascular Endothelial Cell Proliferation (GO:1905564)	669	0.213666	0.645259	0	0	4.90369	7.56807	FGFR1
Positive Regulation Of Voltage-Gated Calcium Channel Activity (GO:1901387)	670	0.213666	0.645259	0	0	4.90369	7.56807	CACNB3
Protein Import Into Peroxisome Matrix, Receptor Recycling (GO:0016562)	671	0.213666	0.645259	0	0	4.90369	7.56807	PEX6
Protein Polyglutamylation (GO:0018095)	672	0.213666	0.645259	0	0	4.90369	7.56807	TTLL1
Purine Nucleoside Bisphosphate Catabolic Process (GO:0034034)	673	0.213666	0.645259	0	0	4.90369	7.56807	NUDT8
Pyrimidine Ribonucleotide Biosynthetic Process (GO:0009220)	674	0.213666	0.645259	0	0	4.90369	7.56807	CTPS1
Regulation Of CD4-positive, Alpha-Beta T Cell Proliferation (GO:2000561)	675	0.213666	0.645259	0	0	4.90369	7.56807	TWSG1
Regulation Of CD8-positive, Alpha-Beta T Cell Differentiation (GO:0043376)	676	0.213666	0.645259	0	0	4.90369	7.56807	RUNX1
Regulation Of TORC2 Signaling (GO:1903939)	677	0.213666	0.645259	0	0	4.90369	7.56807	TELO2
Regulation Of Axon Extension Involved In Axon Guidance (GO:0048841)	678	0.213666	0.645259	0	0	4.90369	7.56807	SEMA4A
Regulation Of Axon Regeneration (GO:0048679)	679	0.213666	0.645259	0	0	4.90369	7.56807	GRN
Regulation Of Cell-Cell Adhesion Mediated By Cadherin (GO:2000047)	680	0.213666	0.645259	0	0	4.90369	7.56807	NOTCH1
Cellular Response To Cytokine Stimulus (GO:0071345)	681	0.215439	0.645259	0	0	1.42696	2.19049	BAG4;PDE12;PDE1B;USP10;HNRNPU;OXSR1;ZNF675;EPOR
DNA-templated DNA Replication Maintenance Of Fidelity (GO:0045005)	682	0.216839	0.645259	0	0	1.93879	2.96364	DDX11;POLE;ATR
Regulation Of Signal Transduction By P53 Class Mediator (GO:1901796)	683	0.216839	0.645259	0	0	1.93879	2.96364	RPS15;HEXIM1;KAT6A
Regulation Of Cytokine Production (GO:0001817)	684	0.219408	0.645259	0	0	1.59631	2.42131	ZBTB39;ZBTB17;TWSG1;ZBTB26;ZBTB2
Positive Regulation Of Cell Cycle Process (GO:0090068)	685	0.219408	0.645259	0	0	1.59631	2.42131	PLK4;DDX11;XRCC3;CDC6;INO80
Negative Regulation Of Macromolecule Metabolic Process (GO:0010605)	686	0.224238	0.645259	0	0	1.50564	2.251	DNMT1;NOTCH1;SFMBT2;ZNF281;SUB1;LDLR
Ubiquitin-Dependent Protein Catabolic Process (GO:0006511)	687	0.226434	0.645259	0	0	1.26686	1.88167	UBL4A;ANKIB1;UBA6;UHRF1;USP44;ZFAND2B;HERC5;ANKRD9;RNF144A;ZNRF2;TBL1XR1;FEM1C;RBCK1;KCTD17;FBXL4
Negative Regulation Of Autophagy (GO:0010507)	688	0.227259	0.645259	0	0	1.88889	2.7987	QSOX1;TSC1;EIF4G1
Regulation Of Cellular Senescence (GO:2000772)	689	0.227787	0.645259	0	0	2.33709	3.45736	CDK6;FBXO5
Secretory Granule Organization (GO:0033363)	690	0.227787	0.645259	0	0	2.33709	3.45736	DTNBP1;HPS6
Sterol Biosynthetic Process (GO:0016126)	691	0.227787	0.645259	0	0	2.33709	3.45736	SQLE;DHCR24
Microtubule Bundle Formation (GO:0001578)	692	0.227787	0.645259	0	0	2.33709	3.45736	MARK4;CDK5RAP2
Platelet Aggregation (GO:0070527)	693	0.227787	0.645259	0	0	2.33709	3.45736	ILK;FLNA
Positive Regulation Of Biosynthetic Process (GO:0009891)	694	0.227787	0.645259	0	0	2.33709	3.45736	LARP6;RUNX1
Positive Regulation Of Blood Vessel Endothelial Cell Migration (GO:0043536)	695	0.227787	0.645259	0	0	2.33709	3.45736	PIK3C2A;FGFR1
Positive Regulation Of Cell Death (GO:0010942)	696	0.227787	0.645259	0	0	2.33709	3.45736	MARK4;EIF4G1
Positive Regulation Of Substrate Adhesion-Dependent Cell Spreading (GO:1900026)	697	0.227787	0.645259	0	0	2.33709	3.45736	ILK;FLNA
Protein Palmitoylation (GO:0018345)	698	0.227787	0.645259	0	0	2.33709	3.45736	ZDHHC17;ZDHHC14
Positive Regulation Of Transcription By RNA Polymerase II (GO:0045944)	699	0.228396	0.645259	0	0	1.19034	1.75775	CSRNP2;NOTCH1;UHRF1;HNRNPU;FOXO3;ELK1;MED17;PTMS;SLC9A1;RPS6KA3;NFATC2IP;CAMTA2;ACTR2;ZBTB17;LMO7;INO80;OXSR1;RRP1B;PPRC1;USF1;RUNX1;AHI1;TBL1XR1;AGO1;CDK12;NFE2L1
Recombinational Repair (GO:0000725)	700	0.233858	0.645259	0	0	1.55558	2.26032	RMI1;NSMCE2;XRCC3;INO80;RAD54B
Phosphatidylinositol Metabolic Process (GO:0046488)	701	0.237772	0.645259	0	0	1.84148	2.64519	PI4K2B;SYNJ2;PIK3C2A
Positive Regulation Of DNA Recombination (GO:0045911)	702	0.237772	0.645259	0	0	1.84148	2.64519	ACTR2;KMT5C;EP400
Regulation Of Protein Kinase Activity (GO:0045859)	703	0.241183	0.645259	0	0	1.53598	2.18447	AKT1S1;DTNBP1;THY1;CEP85;PAK2
Regulation Of Angiogenesis (GO:0045765)	704	0.241183	0.645259	0	0	1.53598	2.18447	GRN;SERPINF1;AGO1;HK2;RUNX1
Organelle Organization (GO:0006996)	705	0.242145	0.645259	0	0	1.25922	1.78584	PI4K2B;COG8;AGTPBP1;COG7;FAF2;HPS6;THY1;NOA1;KAT6A;PEX6;BNIP1;RICTOR;MARK4;AJUBA
Regulation Of p38MAPK Cascade (GO:1900744)	706	0.242489	0.645259	0	0	2.23063	3.16035	RASGRP1;MAP3K4
Epithelial To Mesenchymal Transition (GO:0001837)	707	0.242489	0.645259	0	0	2.23063	3.16035	NOTCH1;FGFR1
Homotypic Cell-Cell Adhesion (GO:0034109)	708	0.242489	0.645259	0	0	2.23063	3.16035	ILK;FLNA
Phosphatidylcholine Metabolic Process (GO:0046470)	709	0.242489	0.645259	0	0	2.23063	3.16035	GPAT4;CHPT1
Positive Regulation Of TORC1 Signaling (GO:1904263)	710	0.242489	0.645259	0	0	2.23063	3.16035	GPR137;TELO2
Positive Regulation Of Response To Biotic Stimulus (GO:0002833)	711	0.242489	0.645259	0	0	2.23063	3.16035	GRN;POLR3D
Protein Acetylation (GO:0006473)	712	0.242489	0.645259	0	0	2.23063	3.16035	ING5;KAT6A
Cellular Response To Insulin Stimulus (GO:0032869)	713	0.242641	0.645259	0	0	1.63762	2.31916	IRS1;IDE;PIK3C2A;USF1
DNA Ligation (GO:0006266)	714	0.244556	0.645259	0	0	4.086	5.75436	PNKP
Regulation Of Endocytic Recycling (GO:2001135)	715	0.244556	0.645259	0	0	4.086	5.75436	ARHGAP1
Regulation Of Endodeoxyribonuclease Activity (GO:0032071)	716	0.244556	0.645259	0	0	4.086	5.75436	DDX11
NAD Biosynthetic Process (GO:0009435)	717	0.244556	0.645259	0	0	4.086	5.75436	QPRT
Regulation Of Granulocyte Differentiation (GO:0030852)	718	0.244556	0.645259	0	0	4.086	5.75436	RUNX1
T-helper Cell Lineage Commitment (GO:0002295)	719	0.244556	0.645259	0	0	4.086	5.75436	SPN
Adenylate Cyclase-Inhibiting G Protein-Coupled Receptor Signaling Pathway (GO:0007193)	720	0.244556	0.645259	0	0	4.086	5.75436	FLNA
Adherens Junction Assembly (GO:0034333)	721	0.244556	0.645259	0	0	4.086	5.75436	PAK2
Regulation Of Mitochondrial Gene Expression (GO:0062125)	722	0.244556	0.645259	0	0	4.086	5.75436	METTL4
Regulation Of Natural Killer Cell Activation (GO:0032814)	723	0.244556	0.645259	0	0	4.086	5.75436	TICAM1
Atrioventricular Valve Development (GO:0003171)	724	0.244556	0.645259	0	0	4.086	5.75436	NOTCH1
Regulation Of Nitrogen Compound Metabolic Process (GO:0051171)	725	0.244556	0.645259	0	0	4.086	5.75436	LDLR
Regulation Of Nuclear Cell Cycle DNA Replication (GO:0033262)	726	0.244556	0.645259	0	0	4.086	5.75436	INO80
Cardiac Atrium Morphogenesis (GO:0003209)	727	0.244556	0.645259	0	0	4.086	5.75436	NOTCH1
Cellular Response To Alkaloid (GO:0071312)	728	0.244556	0.645259	0	0	4.086	5.75436	CASP7
Regulation Of Tissue Remodeling (GO:0034103)	729	0.244556	0.645259	0	0	4.086	5.75436	RUNX1
Cellular Response To Muramyl Dipeptide (GO:0071225)	730	0.244556	0.645259	0	0	4.086	5.75436	TRIM41
Chemokine-Mediated Signaling Pathway (GO:0070098)	731	0.244556	0.645259	0	0	4.086	5.75436	OXSR1
Chondroitin Sulfate Proteoglycan Metabolic Process (GO:0050654)	732	0.244556	0.645259	0	0	4.086	5.75436	DSE
Respiratory Chain Complex III Assembly (GO:0017062)	733	0.244556	0.645259	0	0	4.086	5.75436	UQCC3
Response To Muscle Stretch (GO:0035994)	734	0.244556	0.645259	0	0	4.086	5.75436	SLC9A1
Dicarboxylic Acid Transport (GO:0006835)	735	0.244556	0.645259	0	0	4.086	5.75436	SLC25A10
Ear Morphogenesis (GO:0042471)	736	0.244556	0.645259	0	0	4.086	5.75436	OXSR1
Embryonic Cranial Skeleton Morphogenesis (GO:0048701)	737	0.244556	0.645259	0	0	4.086	5.75436	MTHFD1
Serine Family Amino Acid Metabolic Process (GO:0009069)	738	0.244556	0.645259	0	0	4.086	5.75436	MTHFD1
Smooth Muscle Contraction (GO:0006939)	739	0.244556	0.645259	0	0	4.086	5.75436	PIK3C2A
snRNA Transcription By RNA Polymerase III (GO:0042796)	740	0.244556	0.645259	0	0	4.086	5.75436	ICE1
Sodium Ion Homeostasis (GO:0055078)	741	0.244556	0.645259	0	0	4.086	5.75436	SLC9A1
Establishment Of Protein Localization To Peroxisome (GO:0072663)	742	0.244556	0.645259	0	0	4.086	5.75436	PEX6
succinyl-CoA Metabolic Process (GO:0006104)	743	0.244556	0.645259	0	0	4.086	5.75436	NUDT8
Fatty Acid Beta-Oxidation Using acyl-CoA Oxidase (GO:0033540)	744	0.244556	0.645259	0	0	4.086	5.75436	ACOX3
Glucose Import (GO:0046323)	745	0.244556	0.645259	0	0	4.086	5.75436	SLC2A3
Glucose Transmembrane Transport (GO:1904659)	746	0.244556	0.645259	0	0	4.086	5.75436	SLC2A3
Ubiquitin-Dependent Protein Catabolic Process Via The C-end Degron Rule Pathway (GO:0140627)	747	0.244556	0.645259	0	0	4.086	5.75436	FEM1C
Histone H2A K63-linked Deubiquitination (GO:0070537)	748	0.244556	0.645259	0	0	4.086	5.75436	MPND
Late Nucleophagy (GO:0044805)	749	0.244556	0.645259	0	0	4.086	5.75436	ULK3
Leukotriene Metabolic Process (GO:0006691)	750	0.244556	0.645259	0	0	4.086	5.75436	GGT1
Lipoprotein Transport (GO:0042953)	751	0.244556	0.645259	0	0	4.086	5.75436	ZDHHC17
Lymphocyte Migration (GO:0072676)	752	0.244556	0.645259	0	0	4.086	5.75436	MYO1G
Megakaryocyte Differentiation (GO:0030219)	753	0.244556	0.645259	0	0	4.086	5.75436	FLNA
Meiotic Sister Chromatid Cohesion (GO:0051177)	754	0.244556	0.645259	0	0	4.086	5.75436	SMC3
Mesenchyme Development (GO:0060485)	755	0.244556	0.645259	0	0	4.086	5.75436	ZFP64
Mitochondrial Respiratory Chain Complex III Assembly (GO:0034551)	756	0.244556	0.645259	0	0	4.086	5.75436	UQCC3
Negative Regulation Of DNA-templated DNA Replication (GO:2000104)	757	0.244556	0.645259	0	0	4.086	5.75436	FBXO5
Negative Regulation Of Autophagosome Assembly (GO:1902902)	758	0.244556	0.645259	0	0	4.086	5.75436	PHF23
Negative Regulation Of Cardiac Muscle Hypertrophy (GO:0010614)	759	0.244556	0.645259	0	0	4.086	5.75436	NOTCH1
Negative Regulation Of Cell Migration Involved In Sprouting Angiogenesis (GO:0090051)	760	0.244556	0.645259	0	0	4.086	5.75436	NOTCH1
Negative Regulation Of Epithelial Cell Differentiation (GO:0030857)	761	0.244556	0.645259	0	0	4.086	5.75436	OXSR1
Negative Regulation Of Immune Effector Process (GO:0002698)	762	0.244556	0.645259	0	0	4.086	5.75436	GRN
Negative Regulation Of Nuclear Division (GO:0051784)	763	0.244556	0.645259	0	0	4.086	5.75436	FBXO5
Negative Regulation Of Transcription By RNA Polymerase I (GO:0016479)	764	0.244556	0.645259	0	0	4.086	5.75436	FLNA
Peptidyl-Amino Acid Modification (GO:0018193)	765	0.244556	0.645259	0	0	4.086	5.75436	METAP2
Piecemeal Microautophagy Of The Nucleus (GO:0034727)	766	0.244556	0.645259	0	0	4.086	5.75436	ULK3
Polysaccharide Biosynthetic Process (GO:0000271)	767	0.244556	0.645259	0	0	4.086	5.75436	HS2ST1
Positive Regulation Of Attachment Of Mitotic Spindle Microtubules To Kinetochore (GO:1902425)	768	0.244556	0.645259	0	0	4.086	5.75436	HNRNPU
Positive Regulation Of Blood Coagulation (GO:0030194)	769	0.244556	0.645259	0	0	4.086	5.75436	USF1
Positive Regulation Of Cation Transmembrane Transport (GO:1904064)	770	0.244556	0.645259	0	0	4.086	5.75436	FLNA
Positive Regulation Of Embryonic Development (GO:0040019)	771	0.244556	0.645259	0	0	4.086	5.75436	OXSR1
Positive Regulation Of Fatty Acid Oxidation (GO:0046321)	772	0.244556	0.645259	0	0	4.086	5.75436	IRS1
Positive Regulation Of Lymphocyte Migration (GO:2000403)	773	0.244556	0.645259	0	0	4.086	5.75436	SPN
Positive Regulation Of Nervous System Process (GO:0031646)	774	0.244556	0.645259	0	0	4.086	5.75436	UNC13B
Positive Regulation Of Phospholipase Activity (GO:0010518)	775	0.244556	0.645259	0	0	4.086	5.75436	FGFR1
Positive Regulation Of Regulated Secretory Pathway (GO:1903307)	776	0.244556	0.645259	0	0	4.086	5.75436	RAB15
Positive Regulation Of Response To Wounding (GO:1903036)	777	0.244556	0.645259	0	0	4.086	5.75436	GRN
Protein Localization To Microtubule (GO:0035372)	778	0.244556	0.645259	0	0	4.086	5.75436	HNRNPU
Regulation Of CD4-positive, Alpha-Beta T Cell Differentiation (GO:0043370)	779	0.244556	0.645259	0	0	4.086	5.75436	RUNX1
Regulation Of PERK-mediated Unfolded Protein Response (GO:1903897)	780	0.244556	0.645259	0	0	4.086	5.75436	PPP1R15B
Regulation Of Attachment Of Mitotic Spindle Microtubules To Kinetochore (GO:1902423)	781	0.244556	0.645259	0	0	4.086	5.75436	HNRNPU
Regulation Of cAMP-mediated Signaling (GO:0043949)	782	0.244556	0.645259	0	0	4.086	5.75436	MGRN1
Regulation Of Cell Cycle (GO:0051726)	783	0.247132	0.645259	0	0	1.2959	1.81146	ING5;ZBTB17;CDK6;C6ORF89;EP400;HNRNPU;TSC1;DHCR24;FBXO5;INO80;MARK4
RNA Modification (GO:0009451)	784	0.248366	0.645259	0	0	1.79639	2.5021	PUS3;WDR4;MRM2
Regulation Of Macromolecule Biosynthetic Process (GO:0010556)	785	0.248366	0.645259	0	0	1.79639	2.5021	ING5;TSC1;FOXO3
tRNA Processing (GO:0008033)	786	0.248366	0.645259	0	0	1.79639	2.5021	PUS3;HEXIM1;WDR4
Glycoprotein Biosynthetic Process (GO:0009101)	787	0.248366	0.645259	0	0	1.79639	2.5021	COG7;CHST10;ST8SIA4
Positive Regulation Of Vasculature Development (GO:1904018)	788	0.248366	0.645259	0	0	1.79639	2.5021	GRN;HK2;RUNX1
Regulation Of ERK1 And ERK2 Cascade (GO:0070372)	789	0.248568	0.645259	0	0	1.51686	2.11153	TRAF7;NOTCH1;ZDHHC17;PDE8A;RASGRP1
Calcium Ion Transmembrane Import Into Cytosol (GO:0097553)	790	0.25723	0.645259	0	0	2.13343	2.89674	CACNB3;FLNA
Skin Development (GO:0043588)	791	0.25723	0.645259	0	0	2.13343	2.89674	DHCR24;FGFR1
Inorganic Anion Transmembrane Transport (GO:0098661)	792	0.25723	0.645259	0	0	2.13343	2.89674	SLC25A10;XPR1
Negative Regulation Of mRNA Catabolic Process (GO:1902373)	793	0.25723	0.645259	0	0	2.13343	2.89674	NBAS;HNRNPU
Neurogenesis (GO:0022008)	794	0.25723	0.645259	0	0	2.13343	2.89674	CDK6;CDK5RAP2
Pattern Recognition Receptor Signaling Pathway (GO:0002221)	795	0.25723	0.645259	0	0	2.13343	2.89674	RPS6KA3;TICAM1
Positive Regulation Of Leukocyte Mediated Cytotoxicity (GO:0001912)	796	0.25723	0.645259	0	0	2.13343	2.89674	CD226;RASGRP1
Protein Localization To Golgi Apparatus (GO:0034067)	797	0.25723	0.645259	0	0	2.13343	2.89674	COG7;RAB33B
Purine Nucleotide Metabolic Process (GO:0006163)	798	0.25723	0.645259	0	0	2.13343	2.89674	MTHFD1;QPRT
Regulation Of JUN Kinase Activity (GO:0043506)	799	0.25723	0.645259	0	0	2.13343	2.89674	ZNF675;MAP3K4
Ribosome Assembly (GO:0042255)	800	0.25903	0.645259	0	0	1.75344	2.36856	RPS15;TRAF7;NOA1
protein-DNA Complex Organization (GO:0071824)	801	0.25903	0.645259	0	0	1.75344	2.36856	CDAN1;HNRNPU;MTA2
Regulation Of MAP Kinase Activity (GO:0043405)	802	0.25903	0.645259	0	0	1.75344	2.36856	CDK12;RASGRP1;FGFR1
Positive Regulation Of Response To External Stimulus (GO:0032103)	803	0.259943	0.645259	0	0	1.58448	2.13476	GRN;POLR3D;USF1;IL17RA
Negative Regulation Of Programmed Cell Death (GO:0043069)	804	0.260265	0.645259	0	0	1.26263	1.69956	RPS6KA3;AHI1;BAG4;RHBDD1;BNIP1;FLNA;FAS;RICTOR;DHCR24;OXSR1;PAK2;PTMS
Plasma Membrane Bounded Cell Projection Assembly (GO:0120031)	805	0.265517	0.645259	0	0	1.31001	1.73717	PLK4;AHI1;ACTR2;EHD4;NOTCH1;IFT81;IFT140;TMEM237;FLNA
Regulation Of Cell Migration (GO:0030334)	806	0.265843	0.645259	0	0	1.28825	1.70673	SEMA4A;GRN;NOTCH1;FLNA;PLXNA1;SGK3;AMOTL1;SUDS3;THY1;FOXO3
Cell-Matrix Adhesion (GO:0007160)	807	0.269754	0.645259	0	0	1.71249	2.24378	ILK;TSC1;THY1
Neuron Projection Guidance (GO:0097485)	808	0.269754	0.645259	0	0	1.71249	2.24378	ROBO3;SEMA4A;NOTCH1
Organonitrogen Compound Catabolic Process (GO:1901565)	809	0.269754	0.645259	0	0	1.71249	2.24378	CASP7;ERAP2;IDE
Positive Regulation Of Telomere Maintenance (GO:0032206)	810	0.269754	0.645259	0	0	1.71249	2.24378	PNKP;INO80;MAP3K4
Regulation Of Phosphoprotein Phosphatase Activity (GO:0043666)	811	0.271984	0.645259	0	0	2.04433	2.66175	PPP1R15B;TSC1
Kidney Development (GO:0001822)	812	0.271984	0.645259	0	0	2.04433	2.66175	CENPF;OXSR1
Lytic Vacuole Organization (GO:0080171)	813	0.271984	0.645259	0	0	2.04433	2.66175	GRN;SPG11
mRNA Modification (GO:0016556)	814	0.271984	0.645259	0	0	2.04433	2.66175	PUS3;METTL4
miRNA Processing (GO:0035196)	815	0.271984	0.645259	0	0	2.04433	2.66175	ZC3H7B;AGO1
Positive Regulation Of G1/S Transition Of Mitotic Cell Cycle (GO:1900087)	816	0.271984	0.645259	0	0	2.04433	2.66175	CDC6;EIF4G1
Positive Regulation Of Innate Immune Response (GO:0045089)	817	0.271984	0.645259	0	0	2.04433	2.66175	TRIM41;POLR3D
Positive Regulation Of Telomerase Activity (GO:0051973)	818	0.271984	0.645259	0	0	2.04433	2.66175	PNKP;MAP3K4
Regulation Of Cellular Component Biogenesis (GO:0044087)	819	0.271984	0.645259	0	0	2.04433	2.66175	LATS1;NOTCH1
B Cell Mediated Immunity (GO:0019724)	820	0.274235	0.645259	0	0	3.50193	4.53069	CD70
Regulation Of Chromatin Binding (GO:0035561)	821	0.274235	0.645259	0	0	3.50193	4.53069	DDX11
Regulation Of Cysteine-Type Endopeptidase Activity Involved In Apoptotic Signaling Pathway (GO:2001267)	822	0.274235	0.645259	0	0	3.50193	4.53069	FAS
Regulation Of Epithelial Cell Differentiation (GO:0030856)	823	0.274235	0.645259	0	0	3.50193	4.53069	OXSR1
N-acetylneuraminate Metabolic Process (GO:0006054)	824	0.274235	0.645259	0	0	3.50193	4.53069	NANP
Regulation Of Helicase Activity (GO:0051095)	825	0.274235	0.645259	0	0	3.50193	4.53069	MSH3
T Cell Migration (GO:0072678)	826	0.274235	0.645259	0	0	3.50193	4.53069	MYO1G
Regulation Of Integrin-Mediated Signaling Pathway (GO:2001044)	827	0.274235	0.645259	0	0	3.50193	4.53069	FLNA
Amino Sugar Biosynthetic Process (GO:0046349)	828	0.274235	0.645259	0	0	3.50193	4.53069	NANP
Regulation Of Microtubule Nucleation (GO:0010968)	829	0.274235	0.645259	0	0	3.50193	4.53069	GIT1
Regulation Of Oligodendrocyte Differentiation (GO:0048713)	830	0.274235	0.645259	0	0	3.50193	4.53069	NOTCH1
Carboxylic Acid Biosynthetic Process (GO:0046394)	831	0.274235	0.645259	0	0	3.50193	4.53069	NANP
Cardiac Epithelial To Mesenchymal Transition (GO:0060317)	832	0.274235	0.645259	0	0	3.50193	4.53069	NOTCH1
Cardiac Ventricle Development (GO:0003231)	833	0.274235	0.645259	0	0	3.50193	4.53069	NOTCH1
Regulation Of Sister Chromatid Cohesion (GO:0007063)	834	0.274235	0.645259	0	0	3.50193	4.53069	DDX11
Regulation Of Vascular Endothelial Cell Proliferation (GO:1905562)	835	0.274235	0.645259	0	0	3.50193	4.53069	FGFR1
Chondroitin Sulfate Biosynthetic Process (GO:0030206)	836	0.274235	0.645259	0	0	3.50193	4.53069	CHSY1
Clathrin Coat Assembly (GO:0048268)	837	0.274235	0.645259	0	0	3.50193	4.53069	PIK3C2A
Response To Acidic pH (GO:0010447)	838	0.274235	0.645259	0	0	3.50193	4.53069	SLC9A1
Retrograde Axonal Transport (GO:0008090)	839	0.274235	0.645259	0	0	3.50193	4.53069	KIF1C
Embryonic Digit Morphogenesis (GO:0042733)	840	0.274235	0.645259	0	0	3.50193	4.53069	OXSR1
Endoplasmic Reticulum Membrane Organization (GO:0090158)	841	0.274235	0.645259	0	0	3.50193	4.53069	BNIP1
snRNA Transcription By RNA Polymerase II (GO:0042795)	842	0.274235	0.645259	0	0	3.50193	4.53069	ICE1
Somatic Recombination Of Immunoglobulin Gene Segments (GO:0016447)	843	0.274235	0.645259	0	0	3.50193	4.53069	MSH3
Error-Prone Translesion Synthesis (GO:0042276)	844	0.274235	0.645259	0	0	3.50193	4.53069	POLI
Synaptic Vesicle Transport (GO:0048489)	845	0.274235	0.645259	0	0	3.50193	4.53069	SPG11
Telomeric Loop Disassembly (GO:0090657)	846	0.274235	0.645259	0	0	3.50193	4.53069	XRCC3
Glycoprotein Catabolic Process (GO:0006516)	847	0.274235	0.645259	0	0	3.50193	4.53069	FBXO44
Glycosphingolipid Biosynthetic Process (GO:0006688)	848	0.274235	0.645259	0	0	3.50193	4.53069	ST8SIA4
Vesicle Transport Along Actin Filament (GO:0030050)	849	0.274235	0.645259	0	0	3.50193	4.53069	MYO1G
Insulin-Like Growth Factor Receptor Signaling Pathway (GO:0048009)	850	0.274235	0.645259	0	0	3.50193	4.53069	IRS1
Intraciliary Retrograde Transport (GO:0035721)	851	0.274235	0.645259	0	0	3.50193	4.53069	IFT140
Lipoprotein Localization (GO:0044872)	852	0.274235	0.645259	0	0	3.50193	4.53069	ZDHHC17
Lysosomal Microautophagy (GO:0016237)	853	0.274235	0.645259	0	0	3.50193	4.53069	ULK3
mRNA Pseudouridine Synthesis (GO:1990481)	854	0.274235	0.645259	0	0	3.50193	4.53069	PUS3
Mesenchyme Morphogenesis (GO:0072132)	855	0.274235	0.645259	0	0	3.50193	4.53069	NOTCH1
Metanephros Development (GO:0001656)	856	0.274235	0.645259	0	0	3.50193	4.53069	OXSR1
miRNA Metabolic Process (GO:0010586)	857	0.274235	0.645259	0	0	3.50193	4.53069	XPO5
Mononuclear Cell Differentiation (GO:1903131)	858	0.274235	0.645259	0	0	3.50193	4.53069	PDE1B
ncRNA Export From Nucleus (GO:0097064)	859	0.274235	0.645259	0	0	3.50193	4.53069	TSC1
Negative Regulation Of Biomineral Tissue Development (GO:0070168)	860	0.274235	0.645259	0	0	3.50193	4.53069	NOTCH1
Negative Regulation Of Chromosome Organization (GO:2001251)	861	0.274235	0.645259	0	0	3.50193	4.53069	SUB1
Negative Regulation Of Insulin Secretion (GO:0046676)	862	0.274235	0.645259	0	0	3.50193	4.53069	IRS1
Negative Regulation Of Nervous System Development (GO:0051961)	863	0.274235	0.645259	0	0	3.50193	4.53069	NOTCH1
Negative Regulation Of Transcription Regulatory Region DNA Binding (GO:2000678)	864	0.274235	0.645259	0	0	3.50193	4.53069	ZNF675
Peroxisomal Transport (GO:0043574)	865	0.274235	0.645259	0	0	3.50193	4.53069	PEX6
Positive Regulation Of Alpha-Beta T Cell Activation (GO:0046635)	866	0.274235	0.645259	0	0	3.50193	4.53069	HSPH1
Positive Regulation Of Attachment Of Spindle Microtubules To Kinetochore (GO:0051987)	867	0.274235	0.645259	0	0	3.50193	4.53069	HNRNPU
Positive Regulation Of Cellular Response To Insulin Stimulus (GO:1900078)	868	0.274235	0.645259	0	0	3.50193	4.53069	IRS1
Positive Regulation Of Centriole Replication (GO:0046601)	869	0.274235	0.645259	0	0	3.50193	4.53069	PLK4
Positive Regulation Of Glial Cell Differentiation (GO:0045687)	870	0.274235	0.645259	0	0	3.50193	4.53069	NOTCH1
Positive Regulation Of Insulin Receptor Signaling Pathway (GO:0046628)	871	0.274235	0.645259	0	0	3.50193	4.53069	IRS1
Positive Regulation Of Natural Killer Cell Activation (GO:0032816)	872	0.274235	0.645259	0	0	3.50193	4.53069	TICAM1
Positive Regulation Of Phosphatidylinositol 3-Kinase Activity (GO:0043552)	873	0.274235	0.645259	0	0	3.50193	4.53069	IRS1
Positive Regulation Of Potassium Ion Transmembrane Transport (GO:1901381)	874	0.274235	0.645259	0	0	3.50193	4.53069	FLNA
Positive Regulation Of Potassium Ion Transport (GO:0043268)	875	0.274235	0.645259	0	0	3.50193	4.53069	FLNA
Positive Regulation Of Protein Sumoylation (GO:0033235)	876	0.274235	0.645259	0	0	3.50193	4.53069	PIAS1
Positive Regulation Of Regulatory T Cell Differentiation (GO:0045591)	877	0.274235	0.645259	0	0	3.50193	4.53069	FOXO3
Positive Regulation Of Type I Interferon-Mediated Signaling Pathway (GO:0060340)	878	0.274235	0.645259	0	0	3.50193	4.53069	TRIM41
pre-miRNA Processing (GO:0031054)	879	0.274235	0.645259	0	0	3.50193	4.53069	AGO1
Protein Homotrimerization (GO:0070207)	880	0.274235	0.645259	0	0	3.50193	4.53069	PXDN
Protein Localization To Cell-Cell Junction (GO:0150105)	881	0.274235	0.645259	0	0	3.50193	4.53069	PAK2
Protein Trimerization (GO:0070206)	882	0.274235	0.645259	0	0	3.50193	4.53069	PXDN
Pulmonary Valve Morphogenesis (GO:0003184)	883	0.274235	0.645259	0	0	3.50193	4.53069	NOTCH1
Regulation Of Brown Fat Cell Differentiation (GO:0090335)	884	0.274235	0.645259	0	0	3.50193	4.53069	HNRNPU
Regulation Of Cell Population Proliferation (GO:0042127)	885	0.275651	0.647858	0	0	1.18923	1.53247	SMARCD1;ZBTB17;NOTCH1;IRS1;UHRF1;TSC1;CDC6;EPOR;PIAS1;RAB33B;RUNX1;ING5;SQLE;CDK6;TNFRSF8;SGK3;FBXO5;FGFR1
ncRNA Processing (GO:0034470)	886	0.278647	0.653423	0	0	1.4449	1.8463	RPS15;DDX49;WDR18;INTS9;MRM2
Non-Membrane-Bounded Organelle Assembly (GO:0140694)	887	0.278647	0.653423	0	0	1.4449	1.8463	SQLE;CENPF;HAUS6;INO80;RPS23
B Cell Activation (GO:0042113)	888	0.280525	0.65414	0	0	1.6734	2.12704	CD70;CTPS1;RASGRP1
Regulation Of Neuron Apoptotic Process (GO:0043523)	889	0.280525	0.65414	0	0	1.6734	2.12704	GRN;AKT1S1;FOXO3
Regulation Of Stress Fiber Assembly (GO:0051492)	890	0.280525	0.65414	0	0	1.6734	2.12704	TSC1;PAK2;SLC9A1
Glucose Homeostasis (GO:0042593)	891	0.280525	0.65414	0	0	1.6734	2.12704	IRS1;HK2;USF1
Positive Regulation Of Organelle Assembly (GO:1902117)	892	0.280525	0.65414	0	0	1.6734	2.12704	PLK4;KCTD17;MARK4
Nervous System Development (GO:0007399)	893	0.281342	0.654576	0	0	1.28676	1.63185	AHI1;RPS6KA3;RNF103;APLP1;ST8SIA4;PPP2R5D;MARK4;PTS;CDK5RAP2
Regulation Of Autophagy (GO:0010506)	894	0.281342	0.654576	0	0	1.28676	1.63185	TRIM8;USP10;LAMP3;ULK3;GPR137;TICAM1;FOXO3;PIK3C2A;EIF4G1
Regulation Of Erythrocyte Differentiation (GO:0045646)	895	0.286727	0.656645	0	0	1.96236	2.45143	CDK6;FOXO3
Melanosome Organization (GO:0032438)	896	0.286727	0.656645	0	0	1.96236	2.45143	DTNBP1;HPS6
Negative Regulation Of Mitotic Cell Cycle Phase Transition (GO:1901991)	897	0.286727	0.656645	0	0	1.96236	2.45143	USP44;FBXO5
Post-Transcriptional Regulation Of Gene Expression (GO:0010608)	898	0.291336	0.656645	0	0	1.63605	2.0177	ZC3H7B;TSC1;FOXO3
DNA Replication (GO:0006260)	899	0.295192	0.656645	0	0	1.48785	1.81537	PNKP;WDR18;POLE;PTMS
Positive Regulation Of Developmental Process (GO:0051094)	900	0.298612	0.656645	0	0	1.31296	1.58685	RPS6KA3;SMARCD1;RALBP1;KMT5C;FBXO5;SUDS3;FGFR1
Regulation Of Metaphase/Anaphase Transition Of Cell Cycle (GO:1902099)	901	0.301437	0.656645	0	0	1.8867	2.26252	SMARCD1;CDC6
Inner Mitochondrial Membrane Organization (GO:0007007)	902	0.301437	0.656645	0	0	1.8867	2.26252	UQCC3;DNAJC11
Intracellular Glucose Homeostasis (GO:0001678)	903	0.301437	0.656645	0	0	1.8867	2.26252	UNC13B;HK2
Negative Regulation Of Blood Vessel Morphogenesis (GO:2000181)	904	0.301437	0.656645	0	0	1.8867	2.26252	SERPINF1;AGO1
Positive Regulation Of Type II Interferon Production (GO:0032729)	905	0.301437	0.656645	0	0	1.8867	2.26252	CD226;RASGRP1
Regulation Of T Cell Receptor Signaling Pathway (GO:0050856)	906	0.301437	0.656645	0	0	1.8867	2.26252	CD226;THY1
Regulation Of Cellular Response To Stress (GO:0080135)	907	0.301664	0.656645	0	0	1.39522	1.67209	ENY2;INO80;AJUBA;ATR;EIF4G1
Positive Regulation Of Angiogenesis (GO:0045766)	908	0.302174	0.656645	0	0	1.60032	1.91519	GRN;HK2;RUNX1
Positive Regulation Of Protein Serine/Threonine Kinase Activity (GO:0071902)	909	0.302174	0.656645	0	0	1.60032	1.91519	RASGRP1;TELO2;FGFR1
CRD-mediated mRNA Stabilization (GO:0070934)	910	0.302751	0.656645	0	0	3.06388	3.66086	HNRNPU
Regulation Of Heterotypic Cell-Cell Adhesion (GO:0034114)	911	0.302751	0.656645	0	0	3.06388	3.66086	THY1
Regulation Of Lymphocyte Migration (GO:2000401)	912	0.302751	0.656645	0	0	3.06388	3.66086	SPN
Regulation Of mRNA Polyadenylation (GO:1900363)	913	0.302751	0.656645	0	0	3.06388	3.66086	ZC3H3
Amyloid-Beta Metabolic Process (GO:0050435)	914	0.302751	0.656645	0	0	3.06388	3.66086	IDE
Regulation Of Nuclear-Transcribed mRNA Catabolic Process, Nonsense-Mediated Decay (GO:2000622)	915	0.302751	0.656645	0	0	3.06388	3.66086	NBAS
Cardiac Conduction (GO:0061337)	916	0.302751	0.656645	0	0	3.06388	3.66086	SLC9A1
Cardiac Muscle Cell Differentiation (GO:0055007)	917	0.302751	0.656645	0	0	3.06388	3.66086	AKAP13
Cell Surface Receptor Signaling Pathway Involved In Heart Development (GO:0061311)	918	0.302751	0.656645	0	0	3.06388	3.66086	NOTCH1
Cellular Response To Corticosteroid Stimulus (GO:0071384)	919	0.302751	0.656645	0	0	3.06388	3.66086	HNRNPU
Cellular Response To Increased Oxygen Levels (GO:0036295)	920	0.302751	0.656645	0	0	3.06388	3.66086	FAS
Cellular Response To Inorganic Substance (GO:0071241)	921	0.302751	0.656645	0	0	3.06388	3.66086	DDX11
Cellular Response To pH (GO:0071467)	922	0.302751	0.656645	0	0	3.06388	3.66086	SLC9A1
Response To Muramyl Dipeptide (GO:0032495)	923	0.302751	0.656645	0	0	3.06388	3.66086	TRIM41
Determination Of Bilateral Symmetry (GO:0009855)	924	0.302751	0.656645	0	0	3.06388	3.66086	NOTCH1
Dicarboxylic Acid Catabolic Process (GO:0043649)	925	0.302751	0.656645	0	0	3.06388	3.66086	QPRT
Endosomal Vesicle Fusion (GO:0034058)	926	0.302751	0.656645	0	0	3.06388	3.66086	SAMD9
Synaptic Vesicle Localization (GO:0097479)	927	0.302751	0.656645	0	0	3.06388	3.66086	SPG11
T-Circle Formation (GO:0090656)	928	0.302751	0.656645	0	0	3.06388	3.66086	XRCC3
tRNA Splicing, Via Endonucleolytic Cleavage And Ligation (GO:0006388)	929	0.302751	0.656645	0	0	3.06388	3.66086	HEXIM1
Formation Of Extrachromosomal Circular DNA (GO:0001325)	930	0.302751	0.656645	0	0	3.06388	3.66086	XRCC3
Telomere Maintenance Via Telomere Trimming (GO:0090737)	931	0.302751	0.656645	0	0	3.06388	3.66086	XRCC3
Ganglioside Biosynthetic Process (GO:0001574)	932	0.302751	0.656645	0	0	3.06388	3.66086	ST8SIA4
Gliogenesis (GO:0042063)	933	0.302751	0.656645	0	0	3.06388	3.66086	CDK6
Heart Trabecula Morphogenesis (GO:0061384)	934	0.302751	0.656645	0	0	3.06388	3.66086	NOTCH1
Histone Ubiquitination (GO:0016574)	935	0.302751	0.656645	0	0	3.06388	3.66086	UHRF1
Intracellular Copper Ion Homeostasis (GO:0006878)	936	0.302751	0.656645	0	0	3.06388	3.66086	ANKRD9
Kinetochore Assembly (GO:0051382)	937	0.302751	0.656645	0	0	3.06388	3.66086	CENPF
Leukocyte Tethering Or Rolling (GO:0050901)	938	0.302751	0.656645	0	0	3.06388	3.66086	SPN
Lipopolysaccharide-Mediated Signaling Pathway (GO:0031663)	939	0.302751	0.656645	0	0	3.06388	3.66086	TICAM1
Mesenchymal Cell Migration (GO:0090497)	940	0.302751	0.656645	0	0	3.06388	3.66086	SEMA4A
Mitral Valve Morphogenesis (GO:0003183)	941	0.302751	0.656645	0	0	3.06388	3.66086	NOTCH1
Negative Regulation Of ATP-dependent Activity (GO:0032780)	942	0.302751	0.656645	0	0	3.06388	3.66086	TSC1
Negative Regulation Of Androgen Receptor Signaling Pathway (GO:0060766)	943	0.302751	0.656645	0	0	3.06388	3.66086	PIAS2
Negative Regulation Of Centrosome Duplication (GO:0010826)	944	0.302751	0.656645	0	0	3.06388	3.66086	CDK5RAP2
Negative Regulation Of Glycolytic Process (GO:0045820)	945	0.302751	0.656645	0	0	3.06388	3.66086	GIT1
Negative Regulation Of Interleukin-1 Beta Production (GO:0032691)	946	0.302751	0.656645	0	0	3.06388	3.66086	GIT1
Negative Regulation Of Interleukin-1 Production (GO:0032692)	947	0.302751	0.656645	0	0	3.06388	3.66086	GIT1
Negative Regulation Of Lymphocyte Proliferation (GO:0050672)	948	0.302751	0.656645	0	0	3.06388	3.66086	SPN
Negative Regulation Of Nuclear-Transcribed mRNA Catabolic Process, Deadenylation-Dependent Decay (GO:1900152)	949	0.302751	0.656645	0	0	3.06388	3.66086	HNRNPU
Peptidyl-Serine Dephosphorylation (GO:0070262)	950	0.302751	0.656645	0	0	3.06388	3.66086	PPP1R15B
Positive Regulation Of Alpha-Beta T Cell Differentiation (GO:0046638)	951	0.302751	0.656645	0	0	3.06388	3.66086	RUNX1
Positive Regulation Of Myeloid Leukocyte Cytokine Production Involved In Immune Response (GO:0061081)	952	0.302751	0.656645	0	0	3.06388	3.66086	TICAM1
Positive Regulation Of Post-Transcriptional Gene Silencing By RNA (GO:1900370)	953	0.302751	0.656645	0	0	3.06388	3.66086	XPO5
Positive Regulation Of Smoothened Signaling Pathway (GO:0045880)	954	0.302751	0.656645	0	0	3.06388	3.66086	ULK3
Positive Regulation Of Stem Cell Proliferation (GO:2000648)	955	0.302751	0.656645	0	0	3.06388	3.66086	HNRNPU
Positive Regulation Of Triglyceride Biosynthetic Process (GO:0010867)	956	0.302751	0.656645	0	0	3.06388	3.66086	LDLR
Positive Regulation Of Vascular Associated Smooth Muscle Cell Proliferation (GO:1904707)	957	0.302751	0.656645	0	0	3.06388	3.66086	DNMT1
Regulation Of Amyloid Fibril Formation (GO:1905906)	958	0.302751	0.656645	0	0	3.06388	3.66086	LDLR
Regulation Of Behavior (GO:0050795)	959	0.302751	0.656645	0	0	3.06388	3.66086	AHI1
Organonitrogen Compound Biosynthetic Process (GO:1901566)	960	0.304104	0.658207	0	0	1.46549	1.7445	NANP;GPAT4;CHPT1;GPHN
Peptidyl-Lysine Modification (GO:0018205)	961	0.304104	0.658207	0	0	1.46549	1.7445	GCSH;NSMCE2;PIAS2;PIAS1
Negative Regulation Of Protein Serine/Threonine Kinase Activity (GO:0071901)	962	0.313032	0.663903	0	0	1.56612	1.81897	LATS1;HEXIM1;LATS2
Regulation Of Ras Protein Signal Transduction (GO:0046578)	963	0.313032	0.663903	0	0	1.56612	1.81897	NOTCH1;RASGRP1;GIT1
Organelle Assembly (GO:0070925)	964	0.313202	0.663903	0	0	1.21281	1.40796	PLK4;AHI1;ACTR2;EHD4;NOTCH1;IFT81;IFT140;TMEM237;ULK3;FLNA;HPS6
RNA 3'-End Processing (GO:0031123)	965	0.316095	0.663903	0	0	1.81664	2.09225	HEXIM1;INTS9
Antiviral Innate Immune Response (GO:0140374)	966	0.316095	0.663903	0	0	1.81664	2.09225	PDE12;USP44
Regulation Of Protein Targeting To Mitochondrion (GO:1903214)	967	0.316095	0.663903	0	0	1.81664	2.09225	BAG4;UBE2J2
Cellular Response To Peptide (GO:1901653)	968	0.316095	0.663903	0	0	1.81664	2.09225	TRIM41;DDX11
Tumor Necrosis Factor-Mediated Signaling Pathway (GO:0033209)	969	0.316095	0.663903	0	0	1.81664	2.09225	ILK;FOXO3
Regulation Of Organelle Organization (GO:0033043)	970	0.322011	0.663903	0	0	1.42273	1.61219	PRMT6;INO80;PAK2;RAB33B
Nuclear-Transcribed mRNA Catabolic Process (GO:0000956)	971	0.322011	0.663903	0	0	1.42273	1.61219	SMG1;NBAS;PDE12;MTPAP
Regulation Of Defense Response (GO:0031347)	972	0.323899	0.663903	0	0	1.53333	1.72856	HERC5;GRN;GGT1
Epithelium Development (GO:0060429)	973	0.323899	0.663903	0	0	1.53333	1.72856	AHI1;MTHFD1;OXSR1
Monocarboxylic Acid Metabolic Process (GO:0032787)	974	0.323899	0.663903	0	0	1.53333	1.72856	DSE;GGT1;ACADSB
Regulation Of Cellular Biosynthetic Process (GO:0031326)	975	0.323899	0.663903	0	0	1.53333	1.72856	ING5;TSC1;FOXO3
Regulation Of Fatty Acid Beta-Oxidation (GO:0031998)	976	0.33015	0.663903	0	0	2.72318	3.01785	IRS1
NAD Metabolic Process (GO:0019674)	977	0.33015	0.663903	0	0	2.72318	3.01785	QPRT
RNA Splicing, Via Endonucleolytic Cleavage And Ligation (GO:0000394)	978	0.33015	0.663903	0	0	2.72318	3.01785	HEXIM1
Regulation Of Isotype Switching (GO:0045191)	979	0.33015	0.663903	0	0	2.72318	3.01785	KMT5C
Actin Filament-Based Transport (GO:0099515)	980	0.33015	0.663903	0	0	2.72318	3.01785	MYO1G
Regulation Of miRNA-mediated Gene Silencing (GO:0060964)	981	0.33015	0.663903	0	0	2.72318	3.01785	EIF4G1
Regulation Of Monocyte Differentiation (GO:0045655)	982	0.33015	0.663903	0	0	2.72318	3.01785	CDK6
Regulation Of Oxidative Phosphorylation (GO:0002082)	983	0.33015	0.663903	0	0	2.72318	3.01785	PDE12
Regulation Of Plasminogen Activation (GO:0010755)	984	0.33015	0.663903	0	0	2.72318	3.01785	RUNX1
Carbohydrate Derivative Catabolic Process (GO:1901136)	985	0.33015	0.663903	0	0	2.72318	3.01785	FBXO44
Cardiac Muscle Tissue Morphogenesis (GO:0055008)	986	0.33015	0.663903	0	0	2.72318	3.01785	NOTCH1
Regulation Of Stem Cell Proliferation (GO:0072091)	987	0.33015	0.663903	0	0	2.72318	3.01785	HNRNPU
Cellular Response To Glucocorticoid Stimulus (GO:0071385)	988	0.33015	0.663903	0	0	2.72318	3.01785	HNRNPU
Dosage Compensation By Inactivation Of X Chromosome (GO:0009048)	989	0.33015	0.663903	0	0	2.72318	3.01785	HNRNPU
Endocardial Cushion Morphogenesis (GO:0003203)	990	0.33015	0.663903	0	0	2.72318	3.01785	NOTCH1
Endoplasmic Reticulum Mannose Trimming (GO:1904380)	991	0.33015	0.663903	0	0	2.72318	3.01785	RNF103
snRNA Transcription (GO:0009301)	992	0.33015	0.663903	0	0	2.72318	3.01785	ICE1
Epiboly Involved In Wound Healing (GO:0090505)	993	0.33015	0.663903	0	0	2.72318	3.01785	FLNA
Sulfur Amino Acid Metabolic Process (GO:0000096)	994	0.33015	0.663903	0	0	2.72318	3.01785	MTHFD1
Extrinsic Apoptotic Signaling Pathway In Absence Of Ligand (GO:0097192)	995	0.33015	0.663903	0	0	2.72318	3.01785	FAS
Tetrahydrofolate Metabolic Process (GO:0046653)	996	0.33015	0.663903	0	0	2.72318	3.01785	MTHFD1
Ganglioside Metabolic Process (GO:0001573)	997	0.33015	0.663903	0	0	2.72318	3.01785	ST8SIA4
Triglyceride Biosynthetic Process (GO:0019432)	998	0.33015	0.663903	0	0	2.72318	3.01785	GPAT4
Glycerolipid Catabolic Process (GO:0046503)	999	0.33015	0.663903	0	0	2.72318	3.01785	PNPLA6
Histone mRNA Catabolic Process (GO:0071044)	1000	0.33015	0.663903	0	0	2.72318	3.01785	MTPAP
Hydrogen Peroxide Catabolic Process (GO:0042744)	1001	0.33015	0.663903	0	0	2.72318	3.01785	PXDN
Inositol Phosphate-Mediated Signaling (GO:0048016)	1002	0.33015	0.663903	0	0	2.72318	3.01785	DHX8
Kinetochore Organization (GO:0051383)	1003	0.33015	0.663903	0	0	2.72318	3.01785	CENPF
Left/Right Pattern Formation (GO:0060972)	1004	0.33015	0.663903	0	0	2.72318	3.01785	NOTCH1
Leukocyte Adhesion To Vascular Endothelial Cell (GO:0061756)	1005	0.33015	0.663903	0	0	2.72318	3.01785	SPN
Mitochondrial Electron Transport, Ubiquinol To Cytochrome C (GO:0006122)	1006	0.33015	0.663903	0	0	2.72318	3.01785	UQCC3
Modulation By Symbiont Of Entry Into Host (GO:0052372)	1007	0.33015	0.663903	0	0	2.72318	3.01785	EXOC2
ncRNA Metabolic Process (GO:0034660)	1008	0.33015	0.663903	0	0	2.72318	3.01785	XPO5
Negative Chemotaxis (GO:0050919)	1009	0.33015	0.663903	0	0	2.72318	3.01785	SEMA4A
Negative Regulation Of DNA Replication (GO:0008156)	1010	0.33015	0.663903	0	0	2.72318	3.01785	CDC6
Negative Regulation Of Ion Transmembrane Transporter Activity (GO:0032413)	1011	0.33015	0.663903	0	0	2.72318	3.01785	OXSR1
Neural Crest Cell Migration (GO:0001755)	1012	0.33015	0.663903	0	0	2.72318	3.01785	SEMA4A
Nicotinamide Nucleotide Metabolic Process (GO:0046496)	1013	0.33015	0.663903	0	0	2.72318	3.01785	QPRT
Phosphatidylinositol-3-Phosphate Biosynthetic Process (GO:0036092)	1014	0.33015	0.663903	0	0	2.72318	3.01785	PIK3C2A
Phospholipid Catabolic Process (GO:0009395)	1015	0.33015	0.663903	0	0	2.72318	3.01785	PNPLA6
Positive Regulation Of DNA-templated DNA Replication (GO:2000105)	1016	0.33015	0.663903	0	0	2.72318	3.01785	INO80
Positive Regulation Of calcineurin-NFAT Signaling Cascade (GO:0070886)	1017	0.33015	0.663903	0	0	2.72318	3.01785	SLC9A1
Positive Regulation Of Calcineurin-Mediated Signaling (GO:0106058)	1018	0.33015	0.663903	0	0	2.72318	3.01785	SLC9A1
Positive Regulation Of Calcium Ion Transmembrane Transport (GO:1904427)	1019	0.33015	0.663903	0	0	2.72318	3.01785	THY1
Positive Regulation Of Cardiac Muscle Hypertrophy (GO:0010613)	1020	0.33015	0.663903	0	0	2.72318	3.01785	SLC9A1
Positive Regulation Of Isotype Switching (GO:0045830)	1021	0.33015	0.663903	0	0	2.72318	3.01785	KMT5C
Positive Regulation Of Leukocyte Migration (GO:0002687)	1022	0.33015	0.663903	0	0	2.72318	3.01785	THY1
Positive Regulation Of Lipid Kinase Activity (GO:0090218)	1023	0.33015	0.663903	0	0	2.72318	3.01785	IRS1
Positive Regulation Of Muscle Hypertrophy (GO:0014742)	1024	0.33015	0.663903	0	0	2.72318	3.01785	SLC9A1
Post-Transcriptional Gene Silencing (GO:0016441)	1025	0.33015	0.663903	0	0	2.72318	3.01785	HEXIM1
pre-mRNA Cleavage Required For Polyadenylation (GO:0098789)	1026	0.33015	0.663903	0	0	2.72318	3.01785	CSTF2T
Presynaptic Endocytosis (GO:0140238)	1027	0.33015	0.663903	0	0	2.72318	3.01785	SYNJ2
Protein Deneddylation (GO:0000338)	1028	0.33015	0.663903	0	0	2.72318	3.01785	COPS7A
Regulation Of T Cell Migration (GO:2000404)	1029	0.33015	0.663903	0	0	2.72318	3.01785	SPN
Regulation Of Cardiac Muscle Contraction By Calcium Ion Signaling (GO:0010882)	1030	0.33015	0.663903	0	0	2.72318	3.01785	SLC9A1
Regulation Of Cell Fate Specification (GO:0042659)	1031	0.33015	0.663903	0	0	2.72318	3.01785	MTA2
Anterograde Axonal Transport (GO:0008089)	1032	0.330681	0.663903	0	0	1.75158	1.9383	DTNBP1;KIF1C
Regulation Of Substrate Adhesion-Dependent Cell Spreading (GO:1900024)	1033	0.330681	0.663903	0	0	1.75158	1.9383	ILK;FLNA
Water-Soluble Vitamin Metabolic Process (GO:0006767)	1034	0.330681	0.663903	0	0	1.75158	1.9383	RFK;SLC2A3
Lysosome Organization (GO:0007040)	1035	0.330681	0.663903	0	0	1.75158	1.9383	GRN;SPG11
Negative Regulation Of Protein Localization (GO:1903828)	1036	0.330681	0.663903	0	0	1.75158	1.9383	LATS1;LATS2
Positive Regulation Of Macromolecule Biosynthetic Process (GO:0010557)	1037	0.330994	0.663903	0	0	1.40226	1.55042	HSPH1;IRS1;LARP4B;LARP6
Proteolysis (GO:0006508)	1038	0.336667	0.673448	0	0	1.25469	1.36593	CASP7;ERAP2;ATG4C;IDE;AEBP1;GGT1;METAP2
Regulation Of T Cell Proliferation (GO:0042129)	1039	0.345179	0.673448	0	0	1.69101	1.79872	SPN;CD70
Positive Regulation Of Macromolecule Metabolic Process (GO:0010604)	1040	0.345478	0.673448	0	0	1.22025	1.29691	DNMT1;NOTCH1;UHRF1;LAMP3;DTNBP1;OXSR1;TICAM1;EIF4G1
Regulation Of Cilium Assembly (GO:1902017)	1041	0.345626	0.673448	0	0	1.4717	1.56354	IFT140;KCTD17;MARK4
Regulation Of Cysteine-Type Endopeptidase Activity Involved In Apoptotic Process (GO:0043281)	1042	0.345626	0.673448	0	0	1.4717	1.56354	RPS6KA3;LAMP3;DHCR24
Positive Regulation Of DNA Biosynthetic Process (GO:2000573)	1043	0.345626	0.673448	0	0	1.4717	1.56354	PNKP;MAP3K4;ATR
Double-Strand Break Repair Via Homologous Recombination (GO:0000724)	1044	0.348445	0.673448	0	0	1.30537	1.37622	RMI1;NSMCE2;XRCC3;INO80;RAD54B
Transmembrane Receptor Protein Tyrosine Kinase Signaling Pathway (GO:0007169)	1045	0.353226	0.673448	0	0	1.25871	1.30987	AHI1;IRS1;IDE;PIK3C2A;PAK2;FGFR1
Cellular Response To Lipid (GO:0071396)	1046	0.356298	0.673448	0	0	1.2915	1.33281	CASP7;TRIM41;IRS1;TICAM1;GIT1
Cytokine-Mediated Signaling Pathway (GO:0019221)	1047	0.356298	0.673448	0	0	1.2915	1.33281	ILK;FOXO3;ZNF675;EPOR;IL17RA
Positive Regulation Of Cellular Catabolic Process (GO:0031331)	1048	0.356298	0.673448	0	0	1.2915	1.33281	TRIM8;IRS1;TICAM1;FOXO3;PIK3C2A
Regulation Of Cytokinesis (GO:0032465)	1049	0.356469	0.673448	0	0	1.4427	1.48816	KLHL21;CDC6;GIT1
Response To Insulin (GO:0032868)	1050	0.356469	0.673448	0	0	1.4427	1.48816	IRS1;TSC1;USF1
Intracellular Calcium Ion Homeostasis (GO:0006874)	1051	0.356469	0.673448	0	0	1.4427	1.48816	TRPM2;SLC35G1;KCTD17
Positive Regulation Of ERK1 And ERK2 Cascade (GO:0070374)	1052	0.356469	0.673448	0	0	1.4427	1.48816	NOTCH1;PDE8A;RASGRP1
Positive Regulation Of Mitotic Cell Cycle Phase Transition (GO:1901992)	1053	0.356469	0.673448	0	0	1.4427	1.48816	NSMCE2;FBXO5;EIF4G1
Positive Regulation Of Plasma Membrane Bounded Cell Projection Assembly (GO:0120034)	1054	0.356469	0.673448	0	0	1.4427	1.48816	ACTR2;KCTD17;MARK4
Regulation Of Extrinsic Apoptotic Signaling Pathway In Absence Of Ligand (GO:2001239)	1055	0.356474	0.673448	0	0	2.45061	2.52779	FGFR1
N-terminal Protein Amino Acid Modification (GO:0031365)	1056	0.356474	0.673448	0	0	2.45061	2.52779	METAP2
T Cell Homeostasis (GO:0043029)	1057	0.356474	0.673448	0	0	2.45061	2.52779	FAS
Regulation Of mRNA 3'-End Processing (GO:0031440)	1058	0.356474	0.673448	0	0	2.45061	2.52779	ZC3H3
Regulation Of Megakaryocyte Differentiation (GO:0045652)	1059	0.356474	0.673448	0	0	2.45061	2.52779	PRMT6
Aspartate Family Amino Acid Metabolic Process (GO:0009066)	1060	0.356474	0.673448	0	0	2.45061	2.52779	MTHFD1
Axonemal Dynein Complex Assembly (GO:0070286)	1061	0.356474	0.673448	0	0	2.45061	2.52779	LRRC61
Regulation Of Platelet Activation (GO:0010543)	1062	0.356474	0.673448	0	0	2.45061	2.52779	FLNA
Regulation Of Receptor Recycling (GO:0001919)	1063	0.356474	0.673448	0	0	2.45061	2.52779	LDLR
Cellular Response To dsRNA (GO:0071359)	1064	0.356474	0.673448	0	0	2.45061	2.52779	PDE12
Regulation Of Voltage-Gated Calcium Channel Activity (GO:1901385)	1065	0.356474	0.673448	0	0	2.45061	2.52779	CACNB3
Resolution Of Meiotic Recombination Intermediates (GO:0000712)	1066	0.356474	0.673448	0	0	2.45061	2.52779	RMI1
Collagen Fibril Organization (GO:0030199)	1067	0.356474	0.673448	0	0	2.45061	2.52779	PXDN
Response To Chemokine (GO:1990868)	1068	0.356474	0.673448	0	0	2.45061	2.52779	OXSR1
Response To Fibroblast Growth Factor (GO:0071774)	1069	0.356474	0.673448	0	0	2.45061	2.52779	ELK1
Ribonucleoside Bisphosphate Metabolic Process (GO:0033875)	1070	0.356474	0.673448	0	0	2.45061	2.52779	GPAT4
Endocardial Cushion Development (GO:0003197)	1071	0.356474	0.673448	0	0	2.45061	2.52779	NOTCH1
Establishment Of Chromosome Localization (GO:0051303)	1072	0.356474	0.673448	0	0	2.45061	2.52779	CENPF
Sulfur Compound Transport (GO:0072348)	1073	0.356474	0.673448	0	0	2.45061	2.52779	SLC25A10
Vasculogenesis (GO:0001570)	1074	0.356474	0.673448	0	0	2.45061	2.52779	NOTCH1
Ventricular Cardiac Muscle Tissue Morphogenesis (GO:0055010)	1075	0.356474	0.673448	0	0	2.45061	2.52779	NOTCH1
Histone Monoubiquitination (GO:0010390)	1076	0.356474	0.673448	0	0	2.45061	2.52779	UHRF1
Insulin Secretion (GO:0030073)	1077	0.356474	0.673448	0	0	2.45061	2.52779	PTPRN2
Intracellular Cholesterol Transport (GO:0032367)	1078	0.356474	0.673448	0	0	2.45061	2.52779	LDLR
Long-Term Memory (GO:0007616)	1079	0.356474	0.673448	0	0	2.45061	2.52779	LDLR
mRNA Cleavage Involved In mRNA Processing (GO:0098787)	1080	0.356474	0.673448	0	0	2.45061	2.52779	CSTF2T
Membrane Protein Intracellular Domain Proteolysis (GO:0031293)	1081	0.356474	0.673448	0	0	2.45061	2.52779	RHBDD1
Mitophagy (GO:0000423)	1082	0.356474	0.673448	0	0	2.45061	2.52779	LRBA
Negative Regulation Of GTPase Activity (GO:0034260)	1083	0.356474	0.673448	0	0	2.45061	2.52779	RRP1B
Negative Regulation Of T Cell Proliferation (GO:0042130)	1084	0.356474	0.673448	0	0	2.45061	2.52779	SPN
Negative Regulation Of Anoikis (GO:2000811)	1085	0.356474	0.673448	0	0	2.45061	2.52779	NOTCH1
Negative Regulation Of Axonogenesis (GO:0050771)	1086	0.356474	0.673448	0	0	2.45061	2.52779	THY1
Negative Regulation Of Cytokine Production Involved In Inflammatory Response (GO:1900016)	1087	0.356474	0.673448	0	0	2.45061	2.52779	CUEDC2
Negative Regulation Of Endoplasmic Reticulum Unfolded Protein Response (GO:1900102)	1088	0.356474	0.673448	0	0	2.45061	2.52779	PPP1R15B
Negative Regulation Of Response To Wounding (GO:1903035)	1089	0.356474	0.673448	0	0	2.45061	2.52779	GIT1
Negative Regulation Of Tumor Necrosis Factor-Mediated Signaling Pathway (GO:0010804)	1090	0.356474	0.673448	0	0	2.45061	2.52779	ZNF675
Positive Regulation Of Extracellular Matrix Organization (GO:1903055)	1091	0.356474	0.673448	0	0	2.45061	2.52779	RUNX1
Positive Regulation Of Histone Deacetylation (GO:0031065)	1092	0.356474	0.673448	0	0	2.45061	2.52779	C6ORF89
Positive Regulation Of Lipid Catabolic Process (GO:0050996)	1093	0.356474	0.673448	0	0	2.45061	2.52779	IRS1
Positive Regulation Of Metaphase/Anaphase Transition Of Cell Cycle (GO:1902101)	1094	0.356474	0.673448	0	0	2.45061	2.52779	NSMCE2
Positive Regulation Of Mitotic Cell Cycle Spindle Assembly Checkpoint (GO:0090267)	1095	0.356474	0.673448	0	0	2.45061	2.52779	XRCC3
Positive Regulation Of Mitotic Metaphase/Anaphase Transition (GO:0045842)	1096	0.356474	0.673448	0	0	2.45061	2.52779	NSMCE2
Positive Regulation Of Phospholipase C Activity (GO:0010863)	1097	0.356474	0.673448	0	0	2.45061	2.52779	FGFR1
Positive Regulation Of Release Of Sequestered Calcium Ion Into Cytosol (GO:0051281)	1098	0.356474	0.673448	0	0	2.45061	2.52779	THY1
Positive Regulation Of Spindle Checkpoint (GO:0090232)	1099	0.356474	0.673448	0	0	2.45061	2.52779	XRCC3
Purine Nucleoside Bisphosphate Metabolic Process (GO:0034032)	1100	0.356474	0.673448	0	0	2.45061	2.52779	GPAT4
Regulation Of Cell Fate Commitment (GO:0010453)	1101	0.356474	0.673448	0	0	2.45061	2.52779	MTA2
rRNA Metabolic Process (GO:0016072)	1102	0.358001	0.675719	0	0	1.34423	1.38082	RPS15;DDX49;WDR18;MRM2
SCF-dependent Proteasomal Ubiquitin-Dependent Protein Catabolic Process (GO:0031146)	1103	0.359573	0.676844	0	0	1.63448	1.67181	FBXO44;FBXL4
Sister Chromatid Segregation (GO:0000819)	1104	0.359573	0.676844	0	0	1.63448	1.67181	LATS1;INO80
Translational Elongation (GO:0006414)	1105	0.359573	0.676844	0	0	1.63448	1.67181	USP10;ZNF598
Protein Stabilization (GO:0050821)	1106	0.362402	0.677611	0	0	1.2186	1.23688	GRN;BAG4;COG7;PEX6;FLNA;TSC1;TELO2
Generation Of Neurons (GO:0048699)	1107	0.367288	0.677611	0	0	1.41481	1.41709	CDK6;RUNX1;FGFR1
Histone Acetylation (GO:0016573)	1108	0.367288	0.677611	0	0	1.41481	1.41709	ENY2;NAA40;EP400
DNA Damage Response (GO:0006974)	1109	0.36841	0.677611	0	0	1.13145	1.12981	SMG1;KMT5C;USP10;DDX11;PNKP;XRCC3;INO80;DDB2;MSH3;MACROD1;EP400;POLI;FBXO5;ATR
Regulation Of Myoblast Differentiation (GO:0045661)	1110	0.37385	0.677611	0	0	1.5816	1.55614	SMARCD1;NOTCH1
Regulation Of Neurogenesis (GO:0050767)	1111	0.37385	0.677611	0	0	1.5816	1.55614	NOTCH1;SERPINF1
Response To Peptide Hormone (GO:0043434)	1112	0.37385	0.677611	0	0	1.5816	1.55614	IRS1;TSC1
Histone Deubiquitination (GO:0016578)	1113	0.37385	0.677611	0	0	1.5816	1.55614	ENY2;MPND
mRNA Catabolic Process (GO:0006402)	1114	0.37385	0.677611	0	0	1.5816	1.55614	NBAS;PDE12
Negative Regulation Of Angiogenesis (GO:0016525)	1115	0.37385	0.677611	0	0	1.5816	1.55614	SERPINF1;AGO1
Regulation Of BMP Signaling Pathway (GO:0030510)	1116	0.37385	0.677611	0	0	1.5816	1.55614	TWSG1;NOTCH1
Positive Regulation Of I-kappaB kinase/NF-kappaB Signaling (GO:0043123)	1117	0.374403	0.677611	0	0	1.22687	1.2053	TRIM8;AKAP13;FLNA;RBCK1;TICAM1;ZDHHC17
Protein Maturation (GO:0051604)	1118	0.376005	0.677611	0	0	1.30812	1.27954	GCSH;CASP7;AEBP1;METAP2
Protein Targeting To Membrane (GO:0006612)	1119	0.378076	0.677611	0	0	1.38798	1.35003	UBL4A;ICMT;ZDHHC14
Positive Regulation Of MAPK Cascade (GO:0043410)	1120	0.379885	0.677611	0	0	1.25158	1.21139	TRAF7;NOTCH1;PDE8A;RASGRP1;FGFR1
DNA Strand Elongation Involved In DNA Replication (GO:0006271)	1121	0.381766	0.677611	0	0	2.22761	2.14507	POLE
Actin Filament Capping (GO:0051693)	1122	0.381766	0.677611	0	0	2.22761	2.14507	CAPZA1
Acylglycerol Biosynthetic Process (GO:0046463)	1123	0.381766	0.677611	0	0	2.22761	2.14507	GPAT4
Ameboidal-Type Cell Migration (GO:0001667)	1124	0.381766	0.677611	0	0	2.22761	2.14507	AMOTL1
Atrioventricular Valve Morphogenesis (GO:0003181)	1125	0.381766	0.677611	0	0	2.22761	2.14507	NOTCH1
Barbed-End Actin Filament Capping (GO:0051016)	1126	0.381766	0.677611	0	0	2.22761	2.14507	CAPZA1
Regulation Of Postsynapse Organization (GO:0099175)	1127	0.381766	0.677611	0	0	2.22761	2.14507	PDLIM5
Regulation Of Potassium Ion Transmembrane Transporter Activity (GO:1901016)	1128	0.381766	0.677611	0	0	2.22761	2.14507	OXSR1
Regulation Of Regulatory T Cell Differentiation (GO:0045589)	1129	0.381766	0.677611	0	0	2.22761	2.14507	FOXO3
Cellular Response To Chemokine (GO:1990869)	1130	0.381766	0.677611	0	0	2.22761	2.14507	OXSR1
Cellular Response To Unfolded Protein (GO:0034620)	1131	0.381766	0.677611	0	0	2.22761	2.14507	RHBDD1
Copper Ion Homeostasis (GO:0055070)	1132	0.381766	0.677611	0	0	2.22761	2.14507	ANKRD9
Response To Exogenous dsRNA (GO:0043330)	1133	0.381766	0.677611	0	0	2.22761	2.14507	TICAM1
Response To Glucocorticoid (GO:0051384)	1134	0.381766	0.677611	0	0	2.22761	2.14507	HNRNPU
Response To Zinc Ion (GO:0010043)	1135	0.381766	0.677611	0	0	2.22761	2.14507	D2HGDH
Determination Of Left/Right Symmetry (GO:0007368)	1136	0.381766	0.677611	0	0	2.22761	2.14507	NOTCH1
Sterol Transport (GO:0015918)	1137	0.381766	0.677611	0	0	2.22761	2.14507	LDLR
Fatty Acid Derivative Biosynthetic Process (GO:1901570)	1138	0.381766	0.677611	0	0	2.22761	2.14507	GGT1
tRNA Aminoacylation (GO:0043039)	1139	0.381766	0.677611	0	0	2.22761	2.14507	YARS2
Focal Adhesion Assembly (GO:0048041)	1140	0.381766	0.677611	0	0	2.22761	2.14507	THY1
Glial Cell Development (GO:0021782)	1141	0.381766	0.677611	0	0	2.22761	2.14507	CDK6
Glycerophospholipid Catabolic Process (GO:0046475)	1142	0.381766	0.677611	0	0	2.22761	2.14507	PNPLA6
Hematopoietic Progenitor Cell Differentiation (GO:0002244)	1143	0.381766	0.677611	0	0	2.22761	2.14507	ARMC6
Iron Ion Transport (GO:0006826)	1144	0.381766	0.677611	0	0	2.22761	2.14507	ARHGAP1
Myoblast Differentiation (GO:0045445)	1145	0.381766	0.677611	0	0	2.22761	2.14507	NOTCH1
Negative Regulation Of Axon Extension (GO:0030517)	1146	0.381766	0.677611	0	0	2.22761	2.14507	SEMA4A
Negative Regulation Of Peptidyl-Threonine Phosphorylation (GO:0010801)	1147	0.381766	0.677611	0	0	2.22761	2.14507	EIF4G1
Organic Cation Transport (GO:0015695)	1148	0.381766	0.677611	0	0	2.22761	2.14507	RALBP1
Organic Cyclic Compound Biosynthetic Process (GO:1901362)	1149	0.381766	0.677611	0	0	2.22761	2.14507	GPHN
Peptidyl-Methionine Modification (GO:0018206)	1150	0.381766	0.677611	0	0	2.22761	2.14507	METAP2
Phosphatidylinositol Dephosphorylation (GO:0046856)	1151	0.381766	0.677611	0	0	2.22761	2.14507	SYNJ2
Positive Regulation Of BMP Signaling Pathway (GO:0030513)	1152	0.381766	0.677611	0	0	2.22761	2.14507	NOTCH1
Positive Regulation Of DNA Damage Response, Signal Transduction By P53 Class Mediator (GO:0043517)	1153	0.381766	0.677611	0	0	2.22761	2.14507	ATR
Positive Regulation Of NLRP3 Inflammasome Complex Assembly (GO:1900227)	1154	0.381766	0.677611	0	0	2.22761	2.14507	MARK4
Positive Regulation Of T Cell Receptor Signaling Pathway (GO:0050862)	1155	0.381766	0.677611	0	0	2.22761	2.14507	CD226
Positive Regulation Of Cytokine Production Involved In Immune Response (GO:0002720)	1156	0.381766	0.677611	0	0	2.22761	2.14507	CD226
Positive Regulation Of Cytoplasmic Translation (GO:2000767)	1157	0.381766	0.677611	0	0	2.22761	2.14507	HNRNPU
Positive Regulation Of Glucose Metabolic Process (GO:0010907)	1158	0.381766	0.677611	0	0	2.22761	2.14507	IRS1
Positive Regulation Of Pathway-Restricted SMAD Protein Phosphorylation (GO:0010862)	1159	0.381766	0.677611	0	0	2.22761	2.14507	TWSG1
Positive Regulation Of Phosphoprotein Phosphatase Activity (GO:0032516)	1160	0.381766	0.677611	0	0	2.22761	2.14507	PPP1R15B
Positive Regulation Of Protein Processing (GO:0010954)	1161	0.381766	0.677611	0	0	2.22761	2.14507	RHBDD1
Positive Regulation Of Telomere Maintenance In Response To DNA Damage (GO:1904507)	1162	0.381766	0.677611	0	0	2.22761	2.14507	INO80
Post-Translational Protein Targeting To Endoplasmic Reticulum Membrane (GO:0006620)	1163	0.381766	0.677611	0	0	2.22761	2.14507	UBL4A
Protein Import Into Peroxisome Matrix (GO:0016558)	1164	0.381766	0.677611	0	0	2.22761	2.14507	PEX6
Protein Localization To Mitochondrion (GO:0070585)	1165	0.381766	0.677611	0	0	2.22761	2.14507	HK2
Protein Localization To Phagophore Assembly Site (GO:0034497)	1166	0.381766	0.677611	0	0	2.22761	2.14507	LRBA
Pseudouridine Synthesis (GO:0001522)	1167	0.381766	0.677611	0	0	2.22761	2.14507	PUS3
Pulmonary Valve Development (GO:0003177)	1168	0.381766	0.677611	0	0	2.22761	2.14507	NOTCH1
Receptor Recycling (GO:0001881)	1169	0.381766	0.677611	0	0	2.22761	2.14507	PEX6
Regulation Of Aerobic Respiration (GO:1903715)	1170	0.381766	0.677611	0	0	2.22761	2.14507	IDE
Regulation Of Calcium Ion Transmembrane Transporter Activity (GO:1901019)	1171	0.381766	0.677611	0	0	2.22761	2.14507	CACNB3
Double-Strand Break Repair (GO:0006302)	1172	0.381808	0.677611	0	0	1.19285	1.14852	RMI1;PNKP;NSMCE2;XRCC3;INO80;MPND;RAD54B
Brain Development (GO:0007420)	1173	0.384992	0.682098	0	0	1.29078	1.23209	CENPF;SYNJ2;GIT1;CDK5RAP2
Positive Regulation Of Autophagy (GO:0010508)	1174	0.384992	0.682098	0	0	1.29078	1.23209	TRIM8;TICAM1;FOXO3;PIK3C2A
Negative Regulation Of Cell Differentiation (GO:0045596)	1175	0.387746	0.683647	0	0	1.23881	1.17366	SMARCD1;NOTCH1;CDK6;HNRNPU;OXSR1
I-kappaB kinase/NF-kappaB Signaling (GO:0007249)	1176	0.387995	0.683647	0	0	1.53202	1.45046	TRIM8;ZNF675
Interstrand Cross-Link Repair (GO:0036297)	1177	0.387995	0.683647	0	0	1.53202	1.45046	FANCI;XRCC3
Positive Regulation Of Double-Strand Break Repair Via Homologous Recombination (GO:1905168)	1178	0.387995	0.683647	0	0	1.53202	1.45046	ACTR2;EP400
Positive Regulation Of Neurogenesis (GO:0050769)	1179	0.387995	0.683647	0	0	1.53202	1.45046	SERPINF1;PLXNA1
Apoptotic Process (GO:0006915)	1180	0.388287	0.683647	0	0	1.1845	1.12055	TRAF7;CASP7;RFK;BNIP1;FAS;DHCR24;HK2
Cellular Response To Nutrient Levels (GO:0031669)	1181	0.388824	0.683647	0	0	1.36214	1.28671	TSC1;RICTOR;EIF4G1
Regulation Of Tumor Necrosis Factor Production (GO:0032680)	1182	0.388824	0.683647	0	0	1.36214	1.28671	SPN;TNFRSF8;RASGRP1
Regulation Of TOR Signaling (GO:0032006)	1183	0.388824	0.683647	0	0	1.36214	1.28671	TSC1;RICTOR;TELO2
protein-RNA Complex Assembly (GO:0022618)	1184	0.395616	0.685567	0	0	1.19658	1.1096	RPS15;HEXIM1;TRAF7;AGO1;DDX23;GEMIN7
Positive Regulation Of Cellular Component Organization (GO:0051130)	1185	0.399527	0.685567	0	0	1.33724	1.22688	ICE1;AJUBA;RUNX1
Positive Regulation Of Cell Population Proliferation (GO:0008284)	1186	0.400583	0.685567	0	0	1.13088	1.03457	SMARCD1;GRN;CDK6;NOTCH1;IRS1;HNRNPU;FBXO5;OXSR1;EPOR;FGFR1
DNA Integrity Checkpoint Signaling (GO:0031570)	1187	0.401998	0.685567	0	0	1.48545	1.3537	CDC6;ATR
Autophagy Of Mitochondrion (GO:0000422)	1188	0.401998	0.685567	0	0	1.48545	1.3537	LRBA;FBXL4
Regulation Of Stress-Activated MAPK Cascade (GO:0032872)	1189	0.401998	0.685567	0	0	1.48545	1.3537	FAS;RASGRP1
tRNA Methylation (GO:0030488)	1190	0.401998	0.685567	0	0	1.48545	1.3537	WDR4;TRMT44
Monoatomic Ion Transport (GO:0006811)	1191	0.401998	0.685567	0	0	1.48545	1.3537	SLC25A10;SLC9A1
Myeloid Leukocyte Differentiation (GO:0002573)	1192	0.401998	0.685567	0	0	1.48545	1.3537	PDE1B;RUNX1
Negative Regulation Of Protein Catabolic Process (GO:0042177)	1193	0.401998	0.685567	0	0	1.48545	1.3537	LAMP3;FLNA
2-Oxoglutarate Metabolic Process (GO:0006103)	1194	0.406067	0.685567	0	0	2.04177	1.84012	D2HGDH
N-glycan Processing (GO:0006491)	1195	0.406067	0.685567	0	0	2.04177	1.84012	ST8SIA4
Regulation Of Glycogen Biosynthetic Process (GO:0005979)	1196	0.406067	0.685567	0	0	2.04177	1.84012	IRS1
Adherens Junction Organization (GO:0034332)	1197	0.406067	0.685567	0	0	2.04177	1.84012	PAK2
Anterograde Synaptic Vesicle Transport (GO:0048490)	1198	0.406067	0.685567	0	0	2.04177	1.84012	DTNBP1
Artery Morphogenesis (GO:0048844)	1199	0.406067	0.685567	0	0	2.04177	1.84012	NOTCH1
Regulation Of Protein Sumoylation (GO:0033233)	1200	0.406067	0.685567	0	0	2.04177	1.84012	PIAS1
Cellular Response To Gamma Radiation (GO:0071480)	1201	0.406067	0.685567	0	0	2.04177	1.84012	ATR
Regulation Of Telomere Maintenance In Response To DNA Damage (GO:1904505)	1202	0.406067	0.685567	0	0	2.04177	1.84012	INO80
Regulation Of Triglyceride Biosynthetic Process (GO:0010866)	1203	0.406067	0.685567	0	0	2.04177	1.84012	LDLR
Regulation Of Viral Life Cycle (GO:1903900)	1204	0.406067	0.685567	0	0	2.04177	1.84012	LAMP3
Chondroitin Sulfate Proteoglycan Biosynthetic Process (GO:0050650)	1205	0.406067	0.685567	0	0	2.04177	1.84012	CHSY1
Coenzyme A Metabolic Process (GO:0015936)	1206	0.406067	0.685567	0	0	2.04177	1.84012	NUDT8
Cotranslational Protein Targeting To Membrane (GO:0006613)	1207	0.406067	0.685567	0	0	2.04177	1.84012	SRP72
Reticulophagy (GO:0061709)	1208	0.406067	0.685567	0	0	2.04177	1.84012	ULK3
Embryonic Skeletal System Development (GO:0048706)	1209	0.406067	0.685567	0	0	2.04177	1.84012	OXSR1
Embryonic Skeletal System Morphogenesis (GO:0048704)	1210	0.406067	0.685567	0	0	2.04177	1.84012	OXSR1
Synaptic Vesicle Transport Along Microtubule (GO:0099517)	1211	0.406067	0.685567	0	0	2.04177	1.84012	DTNBP1
Glucose 6-Phosphate Metabolic Process (GO:0051156)	1212	0.406067	0.685567	0	0	2.04177	1.84012	HK2
Glutamate Metabolic Process (GO:0006536)	1213	0.406067	0.685567	0	0	2.04177	1.84012	GGT1
Vitamin Transport (GO:0051180)	1214	0.406067	0.685567	0	0	2.04177	1.84012	SLC2A3
miRNA-mediated Gene Silencing By Inhibition Of Translation (GO:0035278)	1215	0.406067	0.685567	0	0	2.04177	1.84012	EIF4G1
Negative Regulation Of Myeloid Cell Differentiation (GO:0045638)	1216	0.406067	0.685567	0	0	2.04177	1.84012	CDK6
Nucleosome Disassembly (GO:0006337)	1217	0.406067	0.685567	0	0	2.04177	1.84012	SMARCD1
Odontogenesis (GO:0042476)	1218	0.406067	0.685567	0	0	2.04177	1.84012	OXSR1
Organic Hydroxy Compound Transport (GO:0015850)	1219	0.406067	0.685567	0	0	2.04177	1.84012	RALBP1
Phospholipase C-activating G Protein-Coupled Receptor Signaling Pathway (GO:0007200)	1220	0.406067	0.685567	0	0	2.04177	1.84012	DHX8
Positive Regulation By Host Of Viral Transcription (GO:0043923)	1221	0.406067	0.685567	0	0	2.04177	1.84012	RRP1B
Positive Regulation Of Calcium Ion Transmembrane Transporter Activity (GO:1901021)	1222	0.406067	0.685567	0	0	2.04177	1.84012	SLC9A1
Positive Regulation Of Cell Communication (GO:0010647)	1223	0.406067	0.685567	0	0	2.04177	1.84012	ILK
Positive Regulation Of Fibroblast Proliferation (GO:0048146)	1224	0.406067	0.685567	0	0	2.04177	1.84012	CDK6
Positive Regulation Of Glucose Import (GO:0046326)	1225	0.406067	0.685567	0	0	2.04177	1.84012	IRS1
Positive Regulation Of Mitochondrial Fission (GO:0090141)	1226	0.406067	0.685567	0	0	2.04177	1.84012	RALBP1
Positive Regulation Of p38MAPK Cascade (GO:1900745)	1227	0.406067	0.685567	0	0	2.04177	1.84012	MAP3K4
Positive Regulation Of Phosphatase Activity (GO:0010922)	1228	0.406067	0.685567	0	0	2.04177	1.84012	PPP1R15B
Positive Regulation Of Triglyceride Metabolic Process (GO:0090208)	1229	0.406067	0.685567	0	0	2.04177	1.84012	LDLR
Protein Alpha-1,2-Demannosylation (GO:0036508)	1230	0.406067	0.685567	0	0	2.04177	1.84012	RNF103
Protein Localization To Cell Junction (GO:1902414)	1231	0.406067	0.685567	0	0	2.04177	1.84012	PAK2
Regulation Of Golgi Organization (GO:1903358)	1232	0.406067	0.685567	0	0	2.04177	1.84012	RAB33B
RNA Methylation (GO:0001510)	1233	0.410178	0.688964	0	0	1.31323	1.1703	METTL4;TRMT44;MRM2
Positive Regulation Of T Cell Activation (GO:0050870)	1234	0.410178	0.688964	0	0	1.31323	1.1703	SMARCD1;CD70;THY1
Positive Regulation Of Defense Response (GO:0031349)	1235	0.410178	0.688964	0	0	1.31323	1.1703	GRN;POLR3D;IL17RA
Cell Morphogenesis Involved In Neuron Differentiation (GO:0048667)	1236	0.415848	0.688964	0	0	1.44161	1.26492	APLP1;ZDHHC17
Vascular Transport (GO:0010232)	1237	0.415848	0.688964	0	0	1.44161	1.26492	ATP8A1;SLC2A3
Mitotic Spindle Assembly (GO:0090307)	1238	0.415848	0.688964	0	0	1.44161	1.26492	FLNA;SMC3
Monocarboxylic Acid Biosynthetic Process (GO:0072330)	1239	0.415848	0.688964	0	0	1.44161	1.26492	DSE;CHST14
Myeloid Cell Differentiation (GO:0030099)	1240	0.415848	0.688964	0	0	1.44161	1.26492	KAT6A;RUNX1
Phospholipid Transport (GO:0015914)	1241	0.415848	0.688964	0	0	1.44161	1.26492	ATP8A1;LDLR
Positive Regulation Of Stem Cell Population Maintenance (GO:1902459)	1242	0.415848	0.688964	0	0	1.44161	1.26492	SMARCD1;SUDS3
Regulation Of G Protein-Coupled Receptor Signaling Pathway (GO:0008277)	1243	0.415848	0.688964	0	0	1.44161	1.26492	MGRN1;GIT1
Regulation Of Amide Metabolic Process (GO:0034248)	1244	0.415848	0.688964	0	0	1.44161	1.26492	TSC1;FOXO3
Cellular Response To Tumor Necrosis Factor (GO:0071356)	1245	0.420771	0.688964	0	0	1.29006	1.11676	BAG4;ILK;FOXO3
Vesicle-Mediated Transport To The Plasma Membrane (GO:0098876)	1246	0.420771	0.688964	0	0	1.29006	1.11676	EHD4;STX6;EXOC2
Regulation Of Cellular Response To Heat (GO:1900034)	1247	0.429414	0.688964	0	0	1.88452	1.59305	ATR
COPII-coated Vesicle Cargo Loading (GO:0090110)	1248	0.429414	0.688964	0	0	1.88452	1.59305	SEC24D
Regulation Of Defense Response To Virus (GO:0050688)	1249	0.429414	0.688964	0	0	1.88452	1.59305	HERC5
DNA Replication Checkpoint Signaling (GO:0000076)	1250	0.429414	0.688964	0	0	1.88452	1.59305	CDC6
Fc-gamma Receptor Signaling Pathway Involved In Phagocytosis (GO:0038096)	1251	0.429414	0.688964	0	0	1.88452	1.59305	MYO1G
acetyl-CoA Metabolic Process (GO:0006084)	1252	0.429414	0.688964	0	0	1.88452	1.59305	NUDT8
Regulation Of Neurotransmitter Secretion (GO:0046928)	1253	0.429414	0.688964	0	0	1.88452	1.59305	DTNBP1
Regulation Of Phosphatidylinositol 3-Kinase Activity (GO:0043551)	1254	0.429414	0.688964	0	0	1.88452	1.59305	IRS1
Cell-Substrate Junction Assembly (GO:0007044)	1255	0.429414	0.688964	0	0	1.88452	1.59305	THY1
Regulation Of Sodium Ion Transmembrane Transport (GO:1902305)	1256	0.429414	0.688964	0	0	1.88452	1.59305	SLMAP
Cellular Response To Lectin (GO:1990858)	1257	0.429414	0.688964	0	0	1.88452	1.59305	PAK2
Regulation Of Transcription Regulatory Region DNA Binding (GO:2000677)	1258	0.429414	0.688964	0	0	1.88452	1.59305	ZNF675
Regulation Of Vascular Associated Smooth Muscle Cell Proliferation (GO:1904705)	1259	0.429414	0.688964	0	0	1.88452	1.59305	DNMT1
Centromere Complex Assembly (GO:0034508)	1260	0.429414	0.688964	0	0	1.88452	1.59305	CENPF
Regulation Of Viral Transcription (GO:0046782)	1261	0.429414	0.688964	0	0	1.88452	1.59305	HEXIM1
Determination Of Heart Left/Right Asymmetry (GO:0061371)	1262	0.429414	0.688964	0	0	1.88452	1.59305	NOTCH1
Dolichol-Linked Oligosaccharide Biosynthetic Process (GO:0006488)	1263	0.429414	0.688964	0	0	1.88452	1.59305	DOLK
Stimulatory C-type Lectin Receptor Signaling Pathway (GO:0002223)	1264	0.429414	0.688964	0	0	1.88452	1.59305	PAK2
Establishment Or Maintenance Of Apical/Basal Cell Polarity (GO:0035088)	1265	0.429414	0.688964	0	0	1.88452	1.59305	PARD6A
Fibroblast Growth Factor Receptor Signaling Pathway (GO:0008543)	1266	0.429414	0.688964	0	0	1.88452	1.59305	FGFR1
tRNA Wobble Base Modification (GO:0002097)	1267	0.429414	0.688964	0	0	1.88452	1.59305	MOCS3
tRNA Wobble Uridine Modification (GO:0002098)	1268	0.429414	0.688964	0	0	1.88452	1.59305	MOCS3
Tail-Anchored Membrane Protein Insertion Into ER Membrane (GO:0071816)	1269	0.429414	0.688964	0	0	1.88452	1.59305	UBL4A
Heart Looping (GO:0001947)	1270	0.429414	0.688964	0	0	1.88452	1.59305	NOTCH1
Wound Healing, Spreading Of Cells (GO:0044319)	1271	0.429414	0.688964	0	0	1.88452	1.59305	FLNA
Histone H4-K5 Acetylation (GO:0043981)	1272	0.429414	0.688964	0	0	1.88452	1.59305	ING5
Histone H4-K8 Acetylation (GO:0043982)	1273	0.429414	0.688964	0	0	1.88452	1.59305	ING5
Innate Immune Response Activating Cell Surface Receptor Signaling Pathway (GO:0002220)	1274	0.429414	0.688964	0	0	1.88452	1.59305	PAK2
Lipid Modification (GO:0030258)	1275	0.429414	0.688964	0	0	1.88452	1.59305	PLPP5
Morphogenesis Of An Epithelium (GO:0002009)	1276	0.429414	0.688964	0	0	1.88452	1.59305	AHI1
Negative Regulation Of Blood Vessel Endothelial Cell Migration (GO:0043537)	1277	0.429414	0.688964	0	0	1.88452	1.59305	NOTCH1
Negative Regulation Of Endothelial Cell Migration (GO:0010596)	1278	0.429414	0.688964	0	0	1.88452	1.59305	NOTCH1
Negative Regulation Of Stress Fiber Assembly (GO:0051497)	1279	0.429414	0.688964	0	0	1.88452	1.59305	PAK2
Nucleotide Biosynthetic Process (GO:0009165)	1280	0.429414	0.688964	0	0	1.88452	1.59305	MTHFD1
Positive Regulation Of Bone Mineralization (GO:0030501)	1281	0.429414	0.688964	0	0	1.88452	1.59305	OXSR1
Positive Regulation Of Transcription By RNA Polymerase III (GO:0045945)	1282	0.429414	0.688964	0	0	1.88452	1.59305	ICE1
Positive Regulation Of Vacuole Organization (GO:0044090)	1283	0.429414	0.688964	0	0	1.88452	1.59305	GRN
Protein Localization To Chromosome, Telomeric Region (GO:0070198)	1284	0.429414	0.688964	0	0	1.88452	1.59305	ATR
rRNA Modification (GO:0000154)	1285	0.429414	0.688964	0	0	1.88452	1.59305	MRM2
Regulation Of DNA Strand Elongation (GO:0060382)	1286	0.429414	0.688964	0	0	1.88452	1.59305	INO80
Regulation Of Autophagosome Maturation (GO:1901096)	1287	0.429414	0.688964	0	0	1.88452	1.59305	PHF23
Regulation Of Bone Resorption (GO:0045124)	1288	0.429414	0.688964	0	0	1.88452	1.59305	GPR137
Regulation Of Kinase Activity (GO:0043549)	1289	0.429534	0.688964	0	0	1.40028	1.18331	HNRNPU;FGFR1
Regulation Of Neuron Differentiation (GO:0045664)	1290	0.429534	0.688964	0	0	1.40028	1.18331	CDK5RAP2;FGFR1
Regulation Of Telomerase Activity (GO:0051972)	1291	0.429534	0.688964	0	0	1.40028	1.18331	PNKP;MAP3K4
Cholesterol Metabolic Process (GO:0008203)	1292	0.429534	0.688964	0	0	1.40028	1.18331	SQLE;DHCR24
Transport Across Blood-Brain Barrier (GO:0150104)	1293	0.429534	0.688964	0	0	1.40028	1.18331	ATP8A1;SLC2A3
Negative Regulation Of Gene Expression, Epigenetic (GO:0045814)	1294	0.429534	0.688964	0	0	1.40028	1.18331	DNMT1;UHRF1
Protein Localization To Chromosome (GO:0034502)	1295	0.429534	0.688964	0	0	1.40028	1.18331	HASPIN;ATR
Regulation Of Macromolecule Metabolic Process (GO:0060255)	1296	0.429609	0.688964	0	0	1.21049	1.02272	TCF19;CDK6;ZFP64;LDLR
Response To Endoplasmic Reticulum Stress (GO:0034976)	1297	0.429609	0.688964	0	0	1.21049	1.02272	PPP1R15B;ERP44;RHBDD1;CREB3L2
Cytoskeleton Organization (GO:0007010)	1298	0.431299	0.690079	0	0	1.26769	1.06607	RICTOR;THY1;AJUBA
Positive Regulation Of Proteasomal Ubiquitin-Dependent Protein Catabolic Process (GO:0032436)	1299	0.431299	0.690079	0	0	1.26769	1.06607	RNF144A;ANKIB1;PIAS1
Positive Regulation Of Ubiquitin-Dependent Protein Catabolic Process (GO:2000060)	1300	0.431299	0.690079	0	0	1.26769	1.06607	RNF144A;ANKIB1;PIAS1
Regulation Of GTPase Activity (GO:0043087)	1301	0.434686	0.694963	0	0	1.16732	0.972528	RALBP1;PLXNA1;THY1;RRP1B;RASGRP1
Protein Polyubiquitination (GO:0000209)	1302	0.441523	0.696116	0	0	1.10814	0.905928	TRIM8;RNF144A;ZNRF2;ANKIB1;RBCK1;UBE2J2;ZNF598;DDB2
Negative Regulation Of Multicellular Organismal Process (GO:0051241)	1303	0.442446	0.696116	0	0	1.15619	0.942799	TWSG1;GRN;NOTCH1;CHSY1;SUDS3
Regulation Of Hydrolase Activity (GO:0051336)	1304	0.44305	0.696116	0	0	1.36125	1.10816	RALBP1;PLXNA1
Response To Metal Ion (GO:0010038)	1305	0.44305	0.696116	0	0	1.36125	1.10816	D2HGDH;GPHN
Dicarboxylic Acid Metabolic Process (GO:0043648)	1306	0.44305	0.696116	0	0	1.36125	1.10816	D2HGDH;GGT1
Double-Strand Break Repair Via Nonhomologous End Joining (GO:0006303)	1307	0.44305	0.696116	0	0	1.36125	1.10816	PNKP;NSMCE2
Mitotic G2/M Transition Checkpoint (GO:0044818)	1308	0.44305	0.696116	0	0	1.36125	1.10816	CDC6;FOXN3
Positive Regulation Of Transmembrane Receptor Protein Serine/Threonine Kinase Signaling Pathway (GO:0090100)	1309	0.44305	0.696116	0	0	1.36125	1.10816	TWSG1;NOTCH1
Regulation Of Actin Filament Polymerization (GO:0030833)	1310	0.44305	0.696116	0	0	1.36125	1.10816	LATS1;PLEKHG2
Positive Regulation Of Intracellular Signal Transduction (GO:1902533)	1311	0.444016	0.696116	0	0	1.07792	0.875159	HEXIM1;RPS15;TRIM8;AKAP13;TRAF7;FLNA;ILK;RICTOR;RBCK1;TICAM1;ZDHHC17;FGFR1
DNA Methylation (GO:0006306)	1312	0.451846	0.696116	0	0	1.74974	1.39001	METTL4
Regulation Of Dendritic Spine Morphogenesis (GO:0061001)	1313	0.451846	0.696116	0	0	1.74974	1.39001	PDLIM5
Fc Receptor Mediated Stimulatory Signaling Pathway (GO:0002431)	1314	0.451846	0.696116	0	0	1.74974	1.39001	MYO1G
Regulation Of Mitochondrial Fission (GO:0090140)	1315	0.451846	0.696116	0	0	1.74974	1.39001	RALBP1
Regulation Of Monoatomic Cation Transmembrane Transport (GO:1904062)	1316	0.451846	0.696116	0	0	1.74974	1.39001	SLMAP
Autophagy Of Nucleus (GO:0044804)	1317	0.451846	0.696116	0	0	1.74974	1.39001	ULK3
Axon Extension (GO:0048675)	1318	0.451846	0.696116	0	0	1.74974	1.39001	SPG11
Regulation Of Nuclear Division (GO:0051783)	1319	0.451846	0.696116	0	0	1.74974	1.39001	FBXO5
Bicellular Tight Junction Assembly (GO:0070830)	1320	0.451846	0.696116	0	0	1.74974	1.39001	PAK2
Regulation Of Phosphatase Activity (GO:0010921)	1321	0.451846	0.696116	0	0	1.74974	1.39001	TSC1
Cardiac Ventricle Morphogenesis (GO:0003208)	1322	0.451846	0.696116	0	0	1.74974	1.39001	NOTCH1
Regulation Of Sodium Ion Transport (GO:0002028)	1323	0.451846	0.696116	0	0	1.74974	1.39001	SLMAP
Cellular Response To Hexose Stimulus (GO:0071331)	1324	0.451846	0.696116	0	0	1.74974	1.39001	UNC13B
Ribosomal Small Subunit Assembly (GO:0000028)	1325	0.451846	0.696116	0	0	1.74974	1.39001	RPS15
Endoplasmic Reticulum To Cytosol Transport (GO:1903513)	1326	0.451846	0.696116	0	0	1.74974	1.39001	FAF2
Establishment Of Protein Localization To Endoplasmic Reticulum (GO:0072599)	1327	0.451846	0.696116	0	0	1.74974	1.39001	ZFAND2B
Establishment Of Vesicle Localization (GO:0051650)	1328	0.451846	0.696116	0	0	1.74974	1.39001	SPG11
Sulfur Compound Catabolic Process (GO:0044273)	1329	0.451846	0.696116	0	0	1.74974	1.39001	NUDT8
Heparan Sulfate Proteoglycan Biosynthetic Process (GO:0015012)	1330	0.451846	0.696116	0	0	1.74974	1.39001	HS2ST1
Vesicle Docking (GO:0048278)	1331	0.451846	0.696116	0	0	1.74974	1.39001	STX6
Intraciliary Anterograde Transport (GO:0035720)	1332	0.451846	0.696116	0	0	1.74974	1.39001	IFT81
Lipid Translocation (GO:0034204)	1333	0.451846	0.696116	0	0	1.74974	1.39001	ATP8A1
mRNA Methylation (GO:0080009)	1334	0.451846	0.696116	0	0	1.74974	1.39001	METTL4
Melanosome Assembly (GO:1903232)	1335	0.451846	0.696116	0	0	1.74974	1.39001	HPS6
Negative Regulation Of T Cell Receptor Signaling Pathway (GO:0050860)	1336	0.451846	0.696116	0	0	1.74974	1.39001	THY1
Negative Regulation Of Actin Filament Bundle Assembly (GO:0032232)	1337	0.451846	0.696116	0	0	1.74974	1.39001	PAK2
Negative Regulation Of Cell-Substrate Adhesion (GO:0010812)	1338	0.451846	0.696116	0	0	1.74974	1.39001	NOTCH1
Negative Regulation Of Signaling (GO:0023057)	1339	0.451846	0.696116	0	0	1.74974	1.39001	LDLR
Negative Regulation Of Telomere Maintenance Via Telomerase (GO:0032211)	1340	0.451846	0.696116	0	0	1.74974	1.39001	HNRNPU
Neuron Apoptotic Process (GO:0051402)	1341	0.451846	0.696116	0	0	1.74974	1.39001	FAS
Positive Regulation Of Rho Protein Signal Transduction (GO:0035025)	1342	0.451846	0.696116	0	0	1.74974	1.39001	AKAP13
Positive Regulation Of Mitotic Sister Chromatid Separation (GO:1901970)	1343	0.451846	0.696116	0	0	1.74974	1.39001	NSMCE2
Positive Regulation Of Receptor Signaling Pathway Via JAK-STAT (GO:0046427)	1344	0.451846	0.696116	0	0	1.74974	1.39001	NOTCH1
Protein Localization To Cell Surface (GO:0034394)	1345	0.451846	0.696116	0	0	1.74974	1.39001	FLNA
protein-DNA Complex Disassembly (GO:0032986)	1346	0.451846	0.696116	0	0	1.74974	1.39001	SMARCD1
Purine-Containing Compound Biosynthetic Process (GO:0072522)	1347	0.451846	0.696116	0	0	1.74974	1.39001	MTHFD1
Regulation Of DNA-templated DNA Replication (GO:0090329)	1348	0.451846	0.696116	0	0	1.74974	1.39001	METTL4
Regulation Of Anoikis (GO:2000209)	1349	0.451846	0.696116	0	0	1.74974	1.39001	NOTCH1
Positive Regulation Of Binding (GO:0051099)	1350	0.452141	0.696116	0	0	1.22519	0.972505	DDX11;SUB1;IDE
Proteolysis Involved In Protein Catabolic Process (GO:0051603)	1351	0.452141	0.696116	0	0	1.22519	0.972505	RHBDD1;IDE;FBXO44
Regulation Of Cyclin-Dependent Protein Kinase Activity (GO:1904029)	1352	0.456386	0.699546	0	0	1.32432	1.03882	HERC5;CDC6
Regulation Of Protein Localization To Nucleus (GO:1900180)	1353	0.456386	0.699546	0	0	1.32432	1.03882	LATS1;LATS2
Glucose Metabolic Process (GO:0006006)	1354	0.456386	0.699546	0	0	1.32432	1.03882	SLC25A10;HK2
Positive Regulation Of Secretion By Cell (GO:1903532)	1355	0.456386	0.699546	0	0	1.32432	1.03882	UNC13B;DTNBP1
Positive Regulation Of Transcription Elongation By RNA Polymerase II (GO:0032968)	1356	0.456386	0.699546	0	0	1.32432	1.03882	CDK12;MED17
Regulation Of DNA-templated Transcription Elongation (GO:0032784)	1357	0.456386	0.699546	0	0	1.32432	1.03882	SETD5;INTS9
Positive Regulation Of Phosphorylation (GO:0042327)	1358	0.457885	0.701327	0	0	1.13455	0.886235	RALBP1;FAS;ILK;RASGRP1;FGFR1
Positive Regulation Of Protein Metabolic Process (GO:0051247)	1359	0.45886	0.702302	0	0	1.11398	0.867798	UHRF1;IDE;LARP4B;RASGRP1;LARP6;EIF4G1
Regulation Of Response To External Stimulus (GO:0032101)	1360	0.462444	0.702832	0	0	1.20498	0.929315	HERC5;GRN;GGT1
Regulation Of TORC1 Signaling (GO:1903432)	1361	0.469537	0.702832	0	0	1.28934	0.974755	GPR137;TELO2
Cellular Response To Chemical Stress (GO:0062197)	1362	0.472663	0.702832	0	0	1.18542	0.888325	SRXN1;FAS;FOXO3
Positive Regulation Of Proteasomal Protein Catabolic Process (GO:1901800)	1363	0.472663	0.702832	0	0	1.18542	0.888325	RNF144A;ANKIB1;PIAS1
Regulation Of DNA Repair (GO:0006282)	1364	0.473204	0.702832	0	0	1.11369	0.833298	SMARCD1;ENY2;EP400;INO80;ATR
DNA Biosynthetic Process (GO:0071897)	1365	0.473398	0.702832	0	0	1.63292	1.22113	POLE
Actin Filament Bundle Organization (GO:0061572)	1366	0.473398	0.702832	0	0	1.63292	1.22113	RFLNA
acyl-CoA Metabolic Process (GO:0006637)	1367	0.473398	0.702832	0	0	1.63292	1.22113	GPAT4
Alpha-Amino Acid Catabolic Process (GO:1901606)	1368	0.473398	0.702832	0	0	1.63292	1.22113	ALDH6A1
Branched-Chain Amino Acid Catabolic Process (GO:0009083)	1369	0.473398	0.702832	0	0	1.63292	1.22113	ALDH6A1
Carboxylic Acid Metabolic Process (GO:0019752)	1370	0.473398	0.702832	0	0	1.63292	1.22113	SLC2A3
Regulation Of Protein Neddylation (GO:2000434)	1371	0.473398	0.702832	0	0	1.63292	1.22113	COPS7A
Connective Tissue Development (GO:0061448)	1372	0.473398	0.702832	0	0	1.63292	1.22113	CREB3L2
Cytoskeleton-Dependent Intracellular Transport (GO:0030705)	1373	0.473398	0.702832	0	0	1.63292	1.22113	KIF1C
snRNA Processing (GO:0016180)	1374	0.473398	0.702832	0	0	1.63292	1.22113	INTS9
Sodium Ion Transmembrane Transport (GO:0035725)	1375	0.473398	0.702832	0	0	1.63292	1.22113	SLC9A1
Establishment Of Epithelial Cell Polarity (GO:0090162)	1376	0.473398	0.702832	0	0	1.63292	1.22113	CYTH3
Synaptic Vesicle Endocytosis (GO:0048488)	1377	0.473398	0.702832	0	0	1.63292	1.22113	SYNJ2
tRNA Metabolic Process (GO:0006399)	1378	0.473398	0.702832	0	0	1.63292	1.22113	YARS2
Tube Closure (GO:0060606)	1379	0.473398	0.702832	0	0	1.63292	1.22113	MTHFD1
Ventricular Septum Morphogenesis (GO:0060412)	1380	0.473398	0.702832	0	0	1.63292	1.22113	NOTCH1
Vesicle Transport Along Microtubule (GO:0047496)	1381	0.473398	0.702832	0	0	1.63292	1.22113	KIF1C
Keratinocyte Differentiation (GO:0030216)	1382	0.473398	0.702832	0	0	1.63292	1.22113	FGFR1
mRNA Cis Splicing, Via Spliceosome (GO:0045292)	1383	0.473398	0.702832	0	0	1.63292	1.22113	DDX23
ncRNA-mediated Post-Transcriptional Gene Silencing (GO:0035194)	1384	0.473398	0.702832	0	0	1.63292	1.22113	AJUBA
Negative Regulation Of Protein Tyrosine Kinase Activity (GO:0061099)	1385	0.473398	0.702832	0	0	1.63292	1.22113	THY1
Negative Regulation Of Secretion By Cell (GO:1903531)	1386	0.473398	0.702832	0	0	1.63292	1.22113	NOTCH1
peptidyl-L-cysteine S-palmitoylation (GO:0018230)	1387	0.473398	0.702832	0	0	1.63292	1.22113	ZDHHC14
peptidyl-S-diacylglycerol-L-cysteine Biosynthetic Process From Peptidyl-Cysteine (GO:0018231)	1388	0.473398	0.702832	0	0	1.63292	1.22113	ZDHHC14
poly(A)+ mRNA Export From Nucleus (GO:0016973)	1389	0.473398	0.702832	0	0	1.63292	1.22113	ENY2
Positive Regulation Of Axonogenesis (GO:0050772)	1390	0.473398	0.702832	0	0	1.63292	1.22113	PLXNA1
Positive Regulation Of Carbohydrate Metabolic Process (GO:0045913)	1391	0.473398	0.702832	0	0	1.63292	1.22113	IRS1
Positive Regulation Of Cell Development (GO:0010720)	1392	0.473398	0.702832	0	0	1.63292	1.22113	SERPINF1
Positive Regulation Of Chromosome Segregation (GO:0051984)	1393	0.473398	0.702832	0	0	1.63292	1.22113	CDC6
Positive Regulation Of Lamellipodium Assembly (GO:0010592)	1394	0.473398	0.702832	0	0	1.63292	1.22113	ACTR2
Positive Regulation Of Nervous System Development (GO:0051962)	1395	0.473398	0.702832	0	0	1.63292	1.22113	SERPINF1
Positive Regulation Of Ossification (GO:0045778)	1396	0.473398	0.702832	0	0	1.63292	1.22113	OXSR1
Positive Regulation Of Receptor Signaling Pathway Via STAT (GO:1904894)	1397	0.473398	0.702832	0	0	1.63292	1.22113	NOTCH1
Primary Neural Tube Formation (GO:0014020)	1398	0.473398	0.702832	0	0	1.63292	1.22113	MTHFD1
Protein Targeting To Peroxisome (GO:0006625)	1399	0.473398	0.702832	0	0	1.63292	1.22113	PEX6
rRNA Methylation (GO:0031167)	1400	0.473398	0.702832	0	0	1.63292	1.22113	MRM2
Regulation Of Cardiac Muscle Contraction (GO:0055117)	1401	0.473398	0.702832	0	0	1.63292	1.22113	SLC9A1
Regulation Of I-kappaB kinase/NF-kappaB Signaling (GO:0043122)	1402	0.478444	0.706056	0	0	1.07867	0.795215	TRIM8;AKAP13;USP10;FLNA;RBCK1;TICAM1;ZDHHC17
Regulation Of Type II Interferon Production (GO:0032649)	1403	0.482496	0.706056	0	0	1.25616	0.915467	CD226;RASGRP1
Positive Regulation Of T Cell Differentiation (GO:0045582)	1404	0.482496	0.706056	0	0	1.25616	0.915467	SMARCD1;FOXO3
Positive Regulation Of Immune Response (GO:0050778)	1405	0.482496	0.706056	0	0	1.25616	0.915467	POLR3D;CD226
Positive Regulation Of Mitochondrion Organization (GO:0010822)	1406	0.482496	0.706056	0	0	1.25616	0.915467	MLLT11;RALBP1
Regulation Of Rho Protein Signal Transduction (GO:0035023)	1407	0.482496	0.706056	0	0	1.25616	0.915467	AKAP13;RALBP1
Positive Regulation Of Protein Modification By Small Protein Conjugation Or Removal (GO:1903322)	1408	0.482792	0.706056	0	0	1.16649	0.849402	FANCI;PHF23;PIAS1
Ribosome Biogenesis (GO:0042254)	1409	0.486496	0.706056	0	0	1.08077	0.778725	RPS15;DDX49;WDR18;TSC1;MRM2;RPS23
Regulation Of Nucleic Acid-Templated Transcription (GO:1903506)	1410	0.487386	0.706056	0	0	1.04255	0.749283	ING5;NOTCH1;ZNF273;ZNF92;ZNF628;KAT6A;ZNF281;ZNF714;FOXN3;AJUBA;ZNF664;ZNF675
Positive Regulation Of Protein Phosphorylation (GO:0001934)	1411	0.489094	0.706056	0	0	1.05935	0.757648	LATS1;TWSG1;RALBP1;FAS;ILK;PAK2;RASGRP1;EIF4G1
Mitotic Cell Cycle Phase Transition (GO:0044772)	1412	0.490481	0.706056	0	0	1.11341	0.79316	LATS1;CDK6;LATS2;POLE
DNA-templated DNA Replication (GO:0006261)	1413	0.492828	0.706056	0	0	1.14815	0.812423	PNKP;WDR18;POLE
Small GTPase Mediated Signal Transduction (GO:0007264)	1414	0.492828	0.706056	0	0	1.14815	0.812423	RALBP1;ARHGAP1;RASGRP1
Regulation Of Cytoplasmic Translation (GO:2000765)	1415	0.494105	0.706056	0	0	1.53071	1.07916	HNRNPU
Fc-gamma Receptor Signaling Pathway (GO:0038094)	1416	0.494105	0.706056	0	0	1.53071	1.07916	MYO1G
Wnt Signaling Pathway, Planar Cell Polarity Pathway (GO:0060071)	1417	0.494105	0.706056	0	0	1.53071	1.07916	VANGL1
Regulation Of Intracellular Estrogen Receptor Signaling Pathway (GO:0033146)	1418	0.494105	0.706056	0	0	1.53071	1.07916	LATS1
Regulation Of Mitotic Spindle Assembly (GO:1901673)	1419	0.494105	0.706056	0	0	1.53071	1.07916	HNRNPU
Aortic Valve Morphogenesis (GO:0003180)	1420	0.494105	0.706056	0	0	1.53071	1.07916	NOTCH1
Cellular Response To Topologically Incorrect Protein (GO:0035967)	1421	0.494105	0.706056	0	0	1.53071	1.07916	RHBDD1
Embryonic Limb Morphogenesis (GO:0030326)	1422	0.494105	0.706056	0	0	1.53071	1.07916	OXSR1
Synaptic Vesicle Cycle (GO:0099504)	1423	0.494105	0.706056	0	0	1.53071	1.07916	GIT1
Synaptic Vesicle Exocytosis (GO:0016079)	1424	0.494105	0.706056	0	0	1.53071	1.07916	UNC13B
Tight Junction Assembly (GO:0120192)	1425	0.494105	0.706056	0	0	1.53071	1.07916	PAK2
Transport Along Microtubule (GO:0010970)	1426	0.494105	0.706056	0	0	1.53071	1.07916	SPG11
Vesicle Cargo Loading (GO:0035459)	1427	0.494105	0.706056	0	0	1.53071	1.07916	SEC24D
Icosanoid Metabolic Process (GO:0006690)	1428	0.494105	0.706056	0	0	1.53071	1.07916	GGT1
Maintenance Of Protein Location In Nucleus (GO:0051457)	1429	0.494105	0.706056	0	0	1.53071	1.07916	HNRNPU
Mitochondrial Cytochrome C Oxidase Assembly (GO:0033617)	1430	0.494105	0.706056	0	0	1.53071	1.07916	COA5
Myeloid Cell Development (GO:0061515)	1431	0.494105	0.706056	0	0	1.53071	1.07916	FLNA
Negative Regulation Of Antigen Receptor-Mediated Signaling Pathway (GO:0050858)	1432	0.494105	0.706056	0	0	1.53071	1.07916	THY1
Negative Regulation Of Catalytic Activity (GO:0043086)	1433	0.494105	0.706056	0	0	1.53071	1.07916	NOTCH1
Negative Regulation Of Insulin Receptor Signaling Pathway (GO:0046627)	1434	0.494105	0.706056	0	0	1.53071	1.07916	IRS1
Negative Regulation Of Protein Secretion (GO:0050709)	1435	0.494105	0.706056	0	0	1.53071	1.07916	IRS1
Negative Regulation Of Proteolysis Involved In Protein Catabolic Process (GO:1903051)	1436	0.494105	0.706056	0	0	1.53071	1.07916	LAMP3
Negative Regulation Of Sequestering Of Calcium Ion (GO:0051283)	1437	0.494105	0.706056	0	0	1.53071	1.07916	FLNA
Negative Regulation Of Stem Cell Population Maintenance (GO:1902455)	1438	0.494105	0.706056	0	0	1.53071	1.07916	SUDS3
Nucleic Acid Phosphodiester Bond Hydrolysis (GO:0090305)	1439	0.494105	0.706056	0	0	1.53071	1.07916	PDE12
Peroxisomal Membrane Transport (GO:0015919)	1440	0.494105	0.706056	0	0	1.53071	1.07916	PEX6
Positive Regulation Of G2/M Transition Of Mitotic Cell Cycle (GO:0010971)	1441	0.494105	0.706056	0	0	1.53071	1.07916	FBXO5
Positive Regulation Of Cell-Cell Adhesion (GO:0022409)	1442	0.494105	0.706056	0	0	1.53071	1.07916	THY1
Positive Regulation Of Glucose Transmembrane Transport (GO:0010828)	1443	0.494105	0.706056	0	0	1.53071	1.07916	IRS1
Positive Regulation Of Microtubule Polymerization Or Depolymerization (GO:0031112)	1444	0.494105	0.706056	0	0	1.53071	1.07916	CDK5RAP2
Positive Regulation Of Phosphate Metabolic Process (GO:0045937)	1445	0.494105	0.706056	0	0	1.53071	1.07916	ILK
Positive Regulation Of Signaling (GO:0023056)	1446	0.494105	0.706056	0	0	1.53071	1.07916	ILK
Positive Regulation Of Small Molecule Metabolic Process (GO:0062013)	1447	0.494105	0.706056	0	0	1.53071	1.07916	IRS1
Positive Regulation Of Smooth Muscle Cell Proliferation (GO:0048661)	1448	0.494105	0.706056	0	0	1.53071	1.07916	DNMT1
Regulation Of DNA Damage Checkpoint (GO:2000001)	1449	0.494105	0.706056	0	0	1.53071	1.07916	TELO2
Regulation Of Cell-Substrate Junction Assembly (GO:0090109)	1450	0.494105	0.706056	0	0	1.53071	1.07916	SLC9A1
Regulation Of Extrinsic Apoptotic Signaling Pathway (GO:2001236)	1451	0.495258	0.706056	0	0	1.22463	0.86052	PAK2;FGFR1
Cellular Response To Ionizing Radiation (GO:0071479)	1452	0.495258	0.706056	0	0	1.22463	0.86052	INO80;ATR
Enzyme-Linked Receptor Protein Signaling Pathway (GO:0007167)	1453	0.495258	0.706056	0	0	1.22463	0.86052	AHI1;FGFR1
Fatty Acid Beta-Oxidation (GO:0006635)	1454	0.495258	0.706056	0	0	1.22463	0.86052	ACOX3;ACAT2
Intracellular Protein Transmembrane Transport (GO:0065002)	1455	0.495258	0.706056	0	0	1.22463	0.86052	PEX6;ZFAND2B
Negative Regulation Of Neuron Death (GO:1901215)	1456	0.495258	0.706056	0	0	1.22463	0.86052	GRN;EIF4G1
Negative Regulation Of Phosphorylation (GO:0042326)	1457	0.495258	0.706056	0	0	1.22463	0.86052	PPP1R15B;HNRNPU
Positive Regulation Of Protein Kinase B Signaling (GO:0051897)	1458	0.495258	0.706056	0	0	1.22463	0.86052	RICTOR;FGFR1
Protein K63-linked Ubiquitination (GO:0070534)	1459	0.495258	0.706056	0	0	1.22463	0.86052	TRIM8;ZNF598
rRNA Processing (GO:0006364)	1460	0.498967	0.710857	0	0	1.10079	0.765287	RPS15;DDX49;WDR18;MRM2
Negative Regulation Of Cell Motility (GO:2000146)	1461	0.502768	0.71513	0	0	1.13037	0.777273	THY1;SUDS3;FOXO3
Protein Complex Oligomerization (GO:0051259)	1462	0.502768	0.71513	0	0	1.13037	0.777273	EHD4;PXDN;SLC9A1
Selective Autophagy (GO:0061912)	1463	0.507818	0.71513	0	0	1.19464	0.809528	LRBA;ULK3
Endocytic Recycling (GO:0032456)	1464	0.507818	0.71513	0	0	1.19464	0.809528	EHD4;STX6
Integrin-Mediated Signaling Pathway (GO:0007229)	1465	0.507818	0.71513	0	0	1.19464	0.809528	ILK;THY1
Positive Regulation Of Peptidyl-Serine Phosphorylation (GO:0033138)	1466	0.507818	0.71513	0	0	1.19464	0.809528	LATS1;EIF4G1
Positive Regulation Of Protein Binding (GO:0032092)	1467	0.507818	0.71513	0	0	1.19464	0.809528	SUB1;IDE
Protein Catabolic Process (GO:0030163)	1468	0.512607	0.71513	0	0	1.11313	0.743846	CASP7;IDE;FBXO44
Regulation Of Glucose Import (GO:0046324)	1469	0.513999	0.71513	0	0	1.44053	0.958718	IRS1
Carboxylic Acid Transport (GO:0046942)	1470	0.513999	0.71513	0	0	1.44053	0.958718	SLC25A10
Cellular Response To Osmotic Stress (GO:0071470)	1471	0.513999	0.71513	0	0	1.44053	0.958718	OXSR1
Cellular Response To Vascular Endothelial Growth Factor Stimulus (GO:0035924)	1472	0.513999	0.71513	0	0	1.44053	0.958718	NOTCH1
Response To Gamma Radiation (GO:0010332)	1473	0.513999	0.71513	0	0	1.44053	0.958718	ATR
Signal Release From Synapse (GO:0099643)	1474	0.513999	0.71513	0	0	1.44053	0.958718	PTPRN2
Endoplasmic Reticulum Calcium Ion Homeostasis (GO:0032469)	1475	0.513999	0.71513	0	0	1.44053	0.958718	KCTD17
Smoothened Signaling Pathway (GO:0007224)	1476	0.513999	0.71513	0	0	1.44053	0.958718	ULK3
Glycolytic Process (GO:0006096)	1477	0.513999	0.71513	0	0	1.44053	0.958718	HK2
Vascular Endothelial Growth Factor Receptor Signaling Pathway (GO:0048010)	1478	0.513999	0.71513	0	0	1.44053	0.958718	PAK2
Ventricular Septum Development (GO:0003281)	1479	0.513999	0.71513	0	0	1.44053	0.958718	NOTCH1
Histone mRNA Metabolic Process (GO:0008334)	1480	0.513999	0.71513	0	0	1.44053	0.958718	MTPAP
Homophilic Cell Adhesion Via Plasma Membrane Adhesion Molecules (GO:0007156)	1481	0.513999	0.71513	0	0	1.44053	0.958718	ROBO3
Lysosomal Lumen Acidification (GO:0007042)	1482	0.513999	0.71513	0	0	1.44053	0.958718	GRN
Natural Killer Cell Activation (GO:0030101)	1483	0.513999	0.71513	0	0	1.44053	0.958718	RASGRP1
Negative Regulation Of T Cell Activation (GO:0050868)	1484	0.513999	0.71513	0	0	1.44053	0.958718	SPN
Negative Regulation Of Cellular Response To Insulin Stimulus (GO:1900077)	1485	0.513999	0.71513	0	0	1.44053	0.958718	IRS1
Negative Regulation Of Intracellular Protein Transport (GO:0090317)	1486	0.513999	0.71513	0	0	1.44053	0.958718	BAG4
Negative Regulation Of Small Molecule Metabolic Process (GO:0062014)	1487	0.513999	0.71513	0	0	1.44053	0.958718	GIT1
Neural Crest Cell Development (GO:0014032)	1488	0.513999	0.71513	0	0	1.44053	0.958718	SEMA4A
Phospholipid Translocation (GO:0045332)	1489	0.513999	0.71513	0	0	1.44053	0.958718	ATP8A1
Positive Regulation Of Antigen Receptor-Mediated Signaling Pathway (GO:0050857)	1490	0.513999	0.71513	0	0	1.44053	0.958718	CD226
Positive Regulation Of Extrinsic Apoptotic Signaling Pathway (GO:2001238)	1491	0.513999	0.71513	0	0	1.44053	0.958718	PAK2
Positive Regulation Of Interleukin-2 Production (GO:0032743)	1492	0.513999	0.71513	0	0	1.44053	0.958718	RUNX1
Positive Regulation Of Leukocyte Cell-Cell Adhesion (GO:1903039)	1493	0.513999	0.71513	0	0	1.44053	0.958718	THY1
Positive Regulation Of Mitotic Nuclear Division (GO:0045840)	1494	0.513999	0.71513	0	0	1.44053	0.958718	NSMCE2
Positive Regulation Of Osteoblast Differentiation (GO:0045669)	1495	0.513999	0.71513	0	0	1.44053	0.958718	FBXO5
Dephosphorylation (GO:0016311)	1496	0.515753	0.71709	0	0	1.07638	0.7127	NANP;PLPP5;PDPR;PPP2R5D
Positive Regulation Of Gene Expression (GO:0010628)	1497	0.516898	0.718202	0	0	1.02447	0.67606	SMARCD1;DNMT1;NOTCH1;LAMP3;DTNBP1;LARP4B;OXSR1;TICAM1;MACROH2A1;LARP6
Defense Response To Virus (GO:0051607)	1498	0.518248	0.719597	0	0	1.05545	0.693746	TRIM8;TRIM41;PDE12;USP44;TRIM35
Axon Development (GO:0061564)	1499	0.520173	0.721306	0	0	1.16608	0.762143	APLP1;ZDHHC17
Replication Fork Processing (GO:0031297)	1500	0.520173	0.721306	0	0	1.16608	0.762143	DDX11;ATR
Regulation Of Small GTPase Mediated Signal Transduction (GO:0051056)	1501	0.522342	0.721455	0	0	1.09641	0.712043	AKAP13;RALBP1;ARHGAP1
Protein Processing (GO:0016485)	1502	0.522342	0.721455	0	0	1.09641	0.712043	AEBP1;GGT1;METAP2
Actin Filament Organization (GO:0007015)	1503	0.53197	0.721455	0	0	1.08017	0.681772	FLNA;RFLNA;MYO1G
Positive Regulation Of DNA Repair (GO:0045739)	1504	0.53197	0.721455	0	0	1.08017	0.681772	SMARCD1;DDX11;INO80
Response To Calcium Ion (GO:0051592)	1505	0.532319	0.721455	0	0	1.13885	0.718058	D2HGDH;CPNE2
Negative Regulation Of Catabolic Process (GO:0009895)	1506	0.532319	0.721455	0	0	1.13885	0.718058	FLNA;GIT1
Nucleosome Organization (GO:0034728)	1507	0.532319	0.721455	0	0	1.13885	0.718058	SMARCD1;CHAF1A
Positive Regulation Of Canonical Wnt Signaling Pathway (GO:0090263)	1508	0.532319	0.721455	0	0	1.13885	0.718058	TBL1XR1;ILK
Positive Regulation Of Inflammatory Response (GO:0050729)	1509	0.532319	0.721455	0	0	1.13885	0.718058	GRN;IL17RA
Regulation Of Establishment Of Planar Polarity (GO:0090175)	1510	0.533113	0.721455	0	0	1.36036	0.855696	VANGL1
RNA Phosphodiester Bond Hydrolysis (GO:0090501)	1511	0.533113	0.721455	0	0	1.36036	0.855696	PDE12
RNA-templated DNA Biosynthetic Process (GO:0006278)	1512	0.533113	0.721455	0	0	1.36036	0.855696	TELO2
Regulation Of Intracellular Steroid Hormone Receptor Signaling Pathway (GO:0033143)	1513	0.533113	0.721455	0	0	1.36036	0.855696	LATS1
Regulation Of Pathway-Restricted SMAD Protein Phosphorylation (GO:0060393)	1514	0.533113	0.721455	0	0	1.36036	0.855696	TWSG1
Regulation Of Potassium Ion Transmembrane Transport (GO:1901379)	1515	0.533113	0.721455	0	0	1.36036	0.855696	FLNA
Carboxylic Acid Transmembrane Transport (GO:1905039)	1516	0.533113	0.721455	0	0	1.36036	0.855696	SLC25A10
Regulation Of Proteolysis Involved In Protein Catabolic Process (GO:1903050)	1517	0.533113	0.721455	0	0	1.36036	0.855696	LATS1
Cellular Response To Epidermal Growth Factor Stimulus (GO:0071364)	1518	0.533113	0.721455	0	0	1.36036	0.855696	PDE8A
Regulatory ncRNA Processing (GO:0070918)	1519	0.533113	0.721455	0	0	1.36036	0.855696	ZC3H7B
Response To Peptide (GO:1901652)	1520	0.533113	0.721455	0	0	1.36036	0.855696	IRS1
snRNA Metabolic Process (GO:0016073)	1521	0.533113	0.721455	0	0	1.36036	0.855696	INTS9
Telomere Maintenance Via Telomerase (GO:0007004)	1522	0.533113	0.721455	0	0	1.36036	0.855696	TELO2
Heart Morphogenesis (GO:0003007)	1523	0.533113	0.721455	0	0	1.36036	0.855696	NOTCH1
Inositol Lipid-Mediated Signaling (GO:0048017)	1524	0.533113	0.721455	0	0	1.36036	0.855696	FGFR1
Mitochondrial RNA Metabolic Process (GO:0000959)	1525	0.533113	0.721455	0	0	1.36036	0.855696	FOXO3
Negative Regulation Of BMP Signaling Pathway (GO:0030514)	1526	0.533113	0.721455	0	0	1.36036	0.855696	NOTCH1
Negative Regulation Of DNA Biosynthetic Process (GO:2000279)	1527	0.533113	0.721455	0	0	1.36036	0.855696	HNRNPU
Negative Regulation Of Peptidase Activity (GO:0010466)	1528	0.533113	0.721455	0	0	1.36036	0.855696	SERPINF1
Neural Tube Closure (GO:0001843)	1529	0.533113	0.721455	0	0	1.36036	0.855696	MTHFD1
Neurotransmitter Secretion (GO:0007269)	1530	0.533113	0.721455	0	0	1.36036	0.855696	PTPRN2
Neurotransmitter Transport (GO:0006836)	1531	0.533113	0.721455	0	0	1.36036	0.855696	PTPRN2
Oligosaccharide Metabolic Process (GO:0009311)	1532	0.533113	0.721455	0	0	1.36036	0.855696	ST8SIA4
Organelle Membrane Fusion (GO:0090174)	1533	0.533113	0.721455	0	0	1.36036	0.855696	STX6
Positive Regulation Of JUN Kinase Activity (GO:0043507)	1534	0.533113	0.721455	0	0	1.36036	0.855696	MAP3K4
Positive Regulation Of Chemokine Production (GO:0032722)	1535	0.533113	0.721455	0	0	1.36036	0.855696	IL17RA
Receptor Signaling Pathway Via STAT (GO:0097696)	1536	0.533113	0.721455	0	0	1.36036	0.855696	PIAS1
Regulation Of NLRP3 Inflammasome Complex Assembly (GO:1900225)	1537	0.533113	0.721455	0	0	1.36036	0.855696	MARK4
Vesicle-Mediated Transport (GO:0016192)	1538	0.533537	0.721558	0	0	1.00838	0.63349	CYTH3;AHI1;RALBP1;EHD4;MGRN1;ARHGAP1;STX6;KIF1C;PIK3C2A;LDLR;EXOC2
Regulation Of Transforming Growth Factor Beta Receptor Signaling Pathway (GO:0017015)	1539	0.541488	0.730154	0	0	1.06441	0.652947	LATS1;LATS2;SUDS3
Cellular Response To Organic Cyclic Compound (GO:0071407)	1540	0.541488	0.730154	0	0	1.06441	0.652947	CASP7;DHX8;PDE12
Neuron Projection Morphogenesis (GO:0048812)	1541	0.541488	0.730154	0	0	1.06441	0.652947	APLP1;DTNBP1;ZDHHC17
Regulation Of Stem Cell Population Maintenance (GO:2000036)	1542	0.544254	0.730154	0	0	1.11285	0.676993	SMARCD1;SUDS3
Positive Regulation Of Type I Interferon Production (GO:0032481)	1543	0.544254	0.730154	0	0	1.11285	0.676993	POLR3D;TICAM1
Regulation Of RNA Metabolic Process (GO:0051252)	1544	0.550894	0.730154	0	0	1.0491	0.625487	ENY2;METTL4;RRP1B
Aortic Valve Development (GO:0003176)	1545	0.551477	0.730154	0	0	1.28863	0.766936	NOTCH1
Regulation Of Nuclear-Transcribed mRNA Catabolic Process, Deadenylation-Dependent Decay (GO:1900151)	1546	0.551477	0.730154	0	0	1.28863	0.766936	HNRNPU
Regulation Of Protein Tyrosine Kinase Activity (GO:0061097)	1547	0.551477	0.730154	0	0	1.28863	0.766936	THY1
Cell-Cell Junction Organization (GO:0045216)	1548	0.551477	0.730154	0	0	1.28863	0.766936	PARD6A
Cellular Defense Response (GO:0006968)	1549	0.551477	0.730154	0	0	1.28863	0.766936	SPN
Release Of Sequestered Calcium Ion Into Cytosol (GO:0051209)	1550	0.551477	0.730154	0	0	1.28863	0.766936	FLNA
Cholesterol Transport (GO:0030301)	1551	0.551477	0.730154	0	0	1.28863	0.766936	LDLR
Renal System Development (GO:0072001)	1552	0.551477	0.730154	0	0	1.28863	0.766936	CENPF
snRNA 3'-End Processing (GO:0034472)	1553	0.551477	0.730154	0	0	1.28863	0.766936	INTS9
Glutamine Family Amino Acid Metabolic Process (GO:0009064)	1554	0.551477	0.730154	0	0	1.28863	0.766936	GGT1
Negative Regulation Of Carbohydrate Metabolic Process (GO:0045912)	1555	0.551477	0.730154	0	0	1.28863	0.766936	GIT1
Negative Regulation Of Intracellular Steroid Hormone Receptor Signaling Pathway (GO:0033144)	1556	0.551477	0.730154	0	0	1.28863	0.766936	PIAS2
Negative Regulation Of Telomere Maintenance Via Telomere Lengthening (GO:1904357)	1557	0.551477	0.730154	0	0	1.28863	0.766936	HNRNPU
Organophosphate Ester Transport (GO:0015748)	1558	0.551477	0.730154	0	0	1.28863	0.766936	LDLR
Peroxisome Organization (GO:0007031)	1559	0.551477	0.730154	0	0	1.28863	0.766936	PEX6
Positive Regulation Of Cell Cycle G2/M Phase Transition (GO:1902751)	1560	0.551477	0.730154	0	0	1.28863	0.766936	FBXO5
Positive Regulation Of Epithelial To Mesenchymal Transition (GO:0010718)	1561	0.551477	0.730154	0	0	1.28863	0.766936	NOTCH1
Positive Regulation Of Erythrocyte Differentiation (GO:0045648)	1562	0.551477	0.730154	0	0	1.28863	0.766936	FOXO3
Positive Regulation Of Neuron Differentiation (GO:0045666)	1563	0.551477	0.730154	0	0	1.28863	0.766936	FGFR1
Positive Regulation Of Peptidase Activity (GO:0010952)	1564	0.551477	0.730154	0	0	1.28863	0.766936	GRN
Positive Regulation Of Release Of Cytochrome C From Mitochondria (GO:0090200)	1565	0.551477	0.730154	0	0	1.28863	0.766936	MLLT11
Protein Neddylation (GO:0045116)	1566	0.551477	0.730154	0	0	1.28863	0.766936	COPS7A
Purine Ribonucleotide Catabolic Process (GO:0009154)	1567	0.551477	0.730154	0	0	1.28863	0.766936	NUDT8
Receptor Signaling Pathway Via JAK-STAT (GO:0007259)	1568	0.551477	0.730154	0	0	1.28863	0.766936	PIAS1
Regulation Of DNA Damage Response, Signal Transduction By P53 Class Mediator (GO:0043516)	1569	0.551477	0.730154	0	0	1.28863	0.766936	ATR
Regulation Of calcineurin-NFAT Signaling Cascade (GO:0070884)	1570	0.551477	0.730154	0	0	1.28863	0.766936	SLC9A1
Regulation Of Catabolic Process (GO:0009894)	1571	0.551477	0.730154	0	0	1.28863	0.766936	LATS1
Regulation Of Cellular Localization (GO:0060341)	1572	0.555975	0.733309	0	0	1.08801	0.638699	PARD6A;STX6
Autophagosome Organization (GO:1905037)	1573	0.555975	0.733309	0	0	1.08801	0.638699	ULK3;SPG11
Cellular Response To Decreased Oxygen Levels (GO:0036294)	1574	0.555975	0.733309	0	0	1.08801	0.638699	NOTCH1;TSC1
Positive Regulation Of Cell Cycle (GO:0045787)	1575	0.555975	0.733309	0	0	1.08801	0.638699	C6ORF89;MARK4
Positive Regulation Of Endothelial Cell Migration (GO:0010595)	1576	0.555975	0.733309	0	0	1.08801	0.638699	GRN;FGFR1
Positive Regulation Of Protein Transport (GO:0051222)	1577	0.555975	0.733309	0	0	1.08801	0.638699	UNC13B;ICE1
Signal Transduction In Response To DNA Damage (GO:0042770)	1578	0.567481	0.739245	0	0	1.06425	0.602951	USP10;ATR
Positive Regulation Of Response To Stimulus (GO:0048584)	1579	0.567481	0.739245	0	0	1.06425	0.602951	ILK;INO80
Regulation Of Programmed Cell Death (GO:0043067)	1580	0.568633	0.739245	0	0	0.994674	0.561514	AKT1S1;EP400;FAS;MARK4;ZDHHC17
JNK Cascade (GO:0007254)	1581	0.569121	0.739245	0	0	1.22408	0.689968	MAP4K3
Regulation Of Lysosomal Lumen pH (GO:0035751)	1582	0.569121	0.739245	0	0	1.22408	0.689968	GRN
Regulation Of Release Of Sequestered Calcium Ion Into Cytosol (GO:0051279)	1583	0.569121	0.739245	0	0	1.22408	0.689968	THY1
Ceramide Biosynthetic Process (GO:0046513)	1584	0.569121	0.739245	0	0	1.22408	0.689968	ST8SIA4
Respiratory Chain Complex IV Assembly (GO:0008535)	1585	0.569121	0.739245	0	0	1.22408	0.689968	COA5
Secondary Alcohol Biosynthetic Process (GO:1902653)	1586	0.569121	0.739245	0	0	1.22408	0.689968	DHCR24
Secondary Alcohol Metabolic Process (GO:1902652)	1587	0.569121	0.739245	0	0	1.22408	0.689968	SQLE
Stress Granule Assembly (GO:0034063)	1588	0.569121	0.739245	0	0	1.22408	0.689968	RPS23
Triglyceride Metabolic Process (GO:0006641)	1589	0.569121	0.739245	0	0	1.22408	0.689968	GPAT4
Myelination (GO:0042552)	1590	0.569121	0.739245	0	0	1.22408	0.689968	MARVELD1
Negative Regulation Of DNA Binding (GO:0043392)	1591	0.569121	0.739245	0	0	1.22408	0.689968	ZNF675
Negative Regulation Of JNK Cascade (GO:0046329)	1592	0.569121	0.739245	0	0	1.22408	0.689968	ZNF675
Negative Regulation Of Endopeptidase Activity (GO:0010951)	1593	0.569121	0.739245	0	0	1.22408	0.689968	SERPINF1
Non-Canonical Wnt Signaling Pathway (GO:0035567)	1594	0.569121	0.739245	0	0	1.22408	0.689968	VANGL1
Organic Hydroxy Compound Biosynthetic Process (GO:1901617)	1595	0.569121	0.739245	0	0	1.22408	0.689968	SQLE
Phosphatidic Acid Biosynthetic Process (GO:0006654)	1596	0.569121	0.739245	0	0	1.22408	0.689968	GPAT4
Positive Regulation Of Cell Division (GO:0051781)	1597	0.569121	0.739245	0	0	1.22408	0.689968	CDC6
Positive Regulation Of Immunoglobulin Production (GO:0002639)	1598	0.569121	0.739245	0	0	1.22408	0.689968	KMT5C
Positive Regulation Of Lamellipodium Organization (GO:1902745)	1599	0.569121	0.739245	0	0	1.22408	0.689968	ACTR2
Protein Export From Nucleus (GO:0006611)	1600	0.569121	0.739245	0	0	1.22408	0.689968	XPO5
Regulation Of Androgen Receptor Signaling Pathway (GO:0060765)	1601	0.569121	0.739245	0	0	1.22408	0.689968	PIAS2
Protein Deubiquitination (GO:0016579)	1602	0.569361	0.739245	0	0	1.01975	0.574367	ENY2;USP10;USP44
Establishment Of Protein Localization To Membrane (GO:0090150)	1603	0.578771	0.748789	0	0	1.04151	0.569546	ICMT;ZDHHC14
Positive Regulation Of Epithelial Cell Proliferation (GO:0050679)	1604	0.578771	0.748789	0	0	1.04151	0.569546	GRN;OXSR1
Positive Regulation Of Cellular Biosynthetic Process (GO:0031328)	1605	0.580086	0.748789	0	0	0.988599	0.53837	IRS1;LARP4B;LDLR;LARP6
Peptide Biosynthetic Process (GO:0043043)	1606	0.582526	0.748789	0	0	0.978561	0.528796	RPS15;GGT1;YARS2;EIF4G1;RPS23
Regulation Of Lamellipodium Assembly (GO:0010591)	1607	0.586072	0.748789	0	0	1.16567	0.622834	ACTR2
Apical Junction Assembly (GO:0043297)	1608	0.586072	0.748789	0	0	1.16567	0.622834	PAK2
Regulation Of Protein Modification By Small Protein Conjugation Or Removal (GO:1903320)	1609	0.586072	0.748789	0	0	1.16567	0.622834	COPS7A
Regulation Of Response To Biotic Stimulus (GO:0002831)	1610	0.586072	0.748789	0	0	1.16567	0.622834	HERC5
Cellular Response To Fibroblast Growth Factor Stimulus (GO:0044344)	1611	0.586072	0.748789	0	0	1.16567	0.622834	FGFR1
Cholesterol Biosynthetic Process (GO:0006695)	1612	0.586072	0.748789	0	0	1.16567	0.622834	DHCR24
Cognition (GO:0050890)	1613	0.586072	0.748789	0	0	1.16567	0.622834	SETD5
Response To Epidermal Growth Factor (GO:0070849)	1614	0.586072	0.748789	0	0	1.16567	0.622834	PDE8A
Sensory Organ Development (GO:0007423)	1615	0.586072	0.748789	0	0	1.16567	0.622834	AHI1
Substrate Adhesion-Dependent Cell Spreading (GO:0034446)	1616	0.586072	0.748789	0	0	1.16567	0.622834	ILK
Extrinsic Apoptotic Signaling Pathway Via Death Domain Receptors (GO:0008625)	1617	0.586072	0.748789	0	0	1.16567	0.622834	DEDD
Gluconeogenesis (GO:0006094)	1618	0.586072	0.748789	0	0	1.16567	0.622834	SLC25A10
Negative Regulation Of DNA Recombination (GO:0045910)	1619	0.586072	0.748789	0	0	1.16567	0.622834	MSH3
Negative Regulation Of Cell-Cell Adhesion (GO:0022408)	1620	0.586072	0.748789	0	0	1.16567	0.622834	NOTCH1
Negative Regulation Of Peptidyl-Tyrosine Phosphorylation (GO:0050732)	1621	0.586072	0.748789	0	0	1.16567	0.622834	THY1
Phosphatidic Acid Metabolic Process (GO:0046473)	1622	0.586072	0.748789	0	0	1.16567	0.622834	GPAT4
Phospholipid Biosynthetic Process (GO:0008654)	1623	0.586072	0.748789	0	0	1.16567	0.622834	DOLK
Positive Regulation Of Cytokinesis (GO:0032467)	1624	0.586072	0.748789	0	0	1.16567	0.622834	CDC6
Protein Exit From Endoplasmic Reticulum (GO:0032527)	1625	0.586072	0.748789	0	0	1.16567	0.622834	FAF2
Proteoglycan Biosynthetic Process (GO:0030166)	1626	0.586072	0.748789	0	0	1.16567	0.622834	CHST10
Regulation Of DNA Biosynthetic Process (GO:2000278)	1627	0.586072	0.748789	0	0	1.16567	0.622834	ING5
Regulation Of Bone Mineralization (GO:0030500)	1628	0.586072	0.748789	0	0	1.16567	0.622834	OXSR1
Nitrogen Compound Transport (GO:0071705)	1629	0.587353	0.749965	0	0	0.991992	0.527869	RALBP1;CENPF;SLC25A10
Defense Response To Bacterium (GO:0042742)	1630	0.589843	0.75094	0	0	1.0197	0.538301	SPN;RBCK1
Fatty Acid Catabolic Process (GO:0009062)	1631	0.589843	0.75094	0	0	1.0197	0.538301	NUDT8;ACAT2
Positive Regulation Of DNA-templated Transcription, Elongation (GO:0032786)	1632	0.589843	0.75094	0	0	1.0197	0.538301	CDK12;MED17
Regulation Of Intracellular Signal Transduction (GO:1902531)	1633	0.593965	0.75094	0	0	0.961669	0.500968	AKAP13;RALBP1;KAT6A;ARHGAP1;RICTOR;PAK2;TELO2
Chromatin Remodeling (GO:0006338)	1634	0.593965	0.75094	0	0	0.961669	0.500968	SMARCD1;C6ORF89;DDX23;HDGF;INO80;SUDS3;MTA2
Protein Modification By Small Protein Removal (GO:0070646)	1635	0.596166	0.75094	0	0	0.978667	0.506201	USP10;USP44;COPS7A
Autophagosome Assembly (GO:0000045)	1636	0.600698	0.75094	0	0	0.998794	0.509048	LRBA;ULK3
Cellular Response To Peptide Hormone Stimulus (GO:0071375)	1637	0.600698	0.75094	0	0	0.998794	0.509048	IRS1;USF1
Exocytosis (GO:0006887)	1638	0.600698	0.75094	0	0	0.998794	0.509048	PIK3C2A;EXOC2
Telomere Organization (GO:0032200)	1639	0.600698	0.75094	0	0	0.998794	0.509048	INO80;ATR
Negative Regulation Of NF-kappaB Transcription Factor Activity (GO:0032088)	1640	0.600698	0.75094	0	0	0.998794	0.509048	RBCK1;ZNF675
Protein Lipidation (GO:0006497)	1641	0.600698	0.75094	0	0	0.998794	0.509048	ZDHHC17;ZDHHC14
Regulation Of Glucose Metabolic Process (GO:0010906)	1642	0.602357	0.75094	0	0	1.11258	0.56397	IRS1
RNA Splicing, Via Transesterification Reactions (GO:0000375)	1643	0.602357	0.75094	0	0	1.11258	0.56397	DDX23
RNA Stabilization (GO:0043489)	1644	0.602357	0.75094	0	0	1.11258	0.56397	HNRNPU
Amino Acid Catabolic Process (GO:0009063)	1645	0.602357	0.75094	0	0	1.11258	0.56397	ALDH6A1
Cell Junction Assembly (GO:0034329)	1646	0.602357	0.75094	0	0	1.11258	0.56397	CAPZA1
Cell Junction Organization (GO:0034330)	1647	0.602357	0.75094	0	0	1.11258	0.56397	CAPZA1
Regulation Of Transcription By RNA Polymerase III (GO:0006359)	1648	0.602357	0.75094	0	0	1.11258	0.56397	ICE1
Regulation Of Transport (GO:0051049)	1649	0.602357	0.75094	0	0	1.11258	0.56397	PTPRN2
Response To Organonitrogen Compound (GO:0010243)	1650	0.602357	0.75094	0	0	1.11258	0.56397	RHBDD1
Epidermal Cell Differentiation (GO:0009913)	1651	0.602357	0.75094	0	0	1.11258	0.56397	FGFR1
Steroid Biosynthetic Process (GO:0006694)	1652	0.602357	0.75094	0	0	1.11258	0.56397	SQLE
Telomere Maintenance Via Telomere Lengthening (GO:0010833)	1653	0.602357	0.75094	0	0	1.11258	0.56397	TELO2
Vesicle Cytoskeletal Trafficking (GO:0099518)	1654	0.602357	0.75094	0	0	1.11258	0.56397	MYO1G
Memory (GO:0007613)	1655	0.602357	0.75094	0	0	1.11258	0.56397	LDLR
Mismatch Repair (GO:0006298)	1656	0.602357	0.75094	0	0	1.11258	0.56397	MSH3
Negative Regulation Of Hydrolase Activity (GO:0051346)	1657	0.602357	0.75094	0	0	1.11258	0.56397	RRP1B
Neuron Migration (GO:0001764)	1658	0.602357	0.75094	0	0	1.11258	0.56397	FGFR1
Neuron Projection Extension (GO:1990138)	1659	0.602357	0.75094	0	0	1.11258	0.56397	SPG11
Positive Regulation Of Exocytosis (GO:0045921)	1660	0.602357	0.75094	0	0	1.11258	0.56397	RAB15
Positive Regulation Of Fat Cell Differentiation (GO:0045600)	1661	0.602357	0.75094	0	0	1.11258	0.56397	HNRNPU
Positive Regulation Of Interferon-Beta Production (GO:0032728)	1662	0.602357	0.75094	0	0	1.11258	0.56397	POLR3D
Positive Regulation Of Lipid Biosynthetic Process (GO:0046889)	1663	0.602357	0.75094	0	0	1.11258	0.56397	LDLR
Positive Regulation Of miRNA Transcription (GO:1902895)	1664	0.602357	0.75094	0	0	1.11258	0.56397	FOXO3
Positive Regulation Of Phosphatidylinositol 3-Kinase Signaling (GO:0014068)	1665	0.602357	0.75094	0	0	1.11258	0.56397	FGFR1
Positive Regulation Of Protein Import Into Nucleus (GO:0042307)	1666	0.602357	0.75094	0	0	1.11258	0.56397	FLNA
Positive Regulation Of Synaptic Transmission (GO:0050806)	1667	0.602357	0.75094	0	0	1.11258	0.56397	DTNBP1
Protein Insertion Into ER Membrane (GO:0045048)	1668	0.602357	0.75094	0	0	1.11258	0.56397	UBL4A
Protein Targeting (GO:0006605)	1669	0.602918	0.75094	0	0	0.959231	0.485346	ICMT;PEX6;ZFAND2B;ZDHHC14
Regulation Of Canonical Wnt Signaling Pathway (GO:0060828)	1670	0.602918	0.75094	0	0	0.959231	0.485346	LATS1;LATS2;TBL1XR1;ILK
Negative Regulation Of Nucleic Acid-Templated Transcription (GO:1903507)	1671	0.604486	0.752442	0	0	0.953267	0.479852	HEXIM1;PRMT6;CENPF;NOTCH1;ZBTB14;KAT6A;ZNF281;KCTD1;FOXN3;SUDS3;MTA2
RNA Splicing, Via Transesterification Reactions With Bulged Adenosine As Nucleophile (GO:0000377)	1672	0.609965	0.758808	0	0	0.946461	0.467887	IK;DHX8;DDX23;HNRNPU;GEMIN7;U2AF1L4
mRNA Processing (GO:0006397)	1673	0.61102	0.759667	0	0	0.94544	0.465747	HEXIM1;IK;DHX8;DDX23;HNRNPU;GEMIN7;U2AF1L4
Regulation Of Protein-Containing Complex Assembly (GO:0043254)	1674	0.613423	0.76062	0	0	0.953054	0.465758	LATS1;ICE1;AJUBA
Mitochondrial Respiratory Chain Complex Assembly (GO:0033108)	1675	0.613423	0.76062	0	0	0.953054	0.465758	LYRM2;UQCC3;COA5
Regulation Of Translation (GO:0006417)	1676	0.616006	0.76062	0	0	0.940299	0.455574	RPS6KA3;TSC1;LARP4B;FOXO3;LARP6;EIF4G1
Regulation Of Chromosome Segregation (GO:0051983)	1677	0.618004	0.76062	0	0	1.0641	0.512108	CDC6
Regulation Of Nucleotide-Excision Repair (GO:2000819)	1678	0.618004	0.76062	0	0	1.0641	0.512108	SMARCD1
Regulation Of Peptidyl-Threonine Phosphorylation (GO:0010799)	1679	0.618004	0.76062	0	0	1.0641	0.512108	EIF4G1
Chordate Embryonic Development (GO:0043009)	1680	0.618004	0.76062	0	0	1.0641	0.512108	FGFR1
Second-Messenger-Mediated Signaling (GO:0019932)	1681	0.618004	0.76062	0	0	1.0641	0.512108	DHX8
Epidermal Growth Factor Receptor Signaling Pathway (GO:0007173)	1682	0.618004	0.76062	0	0	1.0641	0.512108	PIK3C2A
Sterol Metabolic Process (GO:0016125)	1683	0.618004	0.76062	0	0	1.0641	0.512108	SQLE
Establishment Of Mitotic Spindle Orientation (GO:0000132)	1684	0.618004	0.76062	0	0	1.0641	0.512108	CDK5RAP2
Heterochromatin Formation (GO:0031507)	1685	0.618004	0.76062	0	0	1.0641	0.512108	UHRF1
Hexose Biosynthetic Process (GO:0019319)	1686	0.618004	0.76062	0	0	1.0641	0.512108	SLC25A10
Zymogen Activation (GO:0031638)	1687	0.618004	0.76062	0	0	1.0641	0.512108	GGT1
Inorganic Cation Import Across Plasma Membrane (GO:0098659)	1688	0.618004	0.76062	0	0	1.0641	0.512108	SLC9A1
Positive Regulation Of Myeloid Leukocyte Differentiation (GO:0002763)	1689	0.618004	0.76062	0	0	1.0641	0.512108	RUNX1
Potassium Ion Transport (GO:0006813)	1690	0.618004	0.76062	0	0	1.0641	0.512108	SLC9A1
Negative Regulation Of Inflammatory Response (GO:0050728)	1691	0.621755	0.764466	0	0	0.959432	0.455931	GRN;GIT1
Negative Regulation Of Cell Migration (GO:0030336)	1692	0.621864	0.764466	0	0	0.940741	0.446884	THY1;SUDS3;FOXO3
Negative Regulation Of Cell Population Proliferation (GO:0008285)	1693	0.627689	0.767316	0	0	0.929741	0.43299	ING5;ZBTB17;NOTCH1;CDK6;TNFRSF8;TSC1;CDC6
Regulation Of Proteasomal Ubiquitin-Dependent Protein Catabolic Process (GO:0032434)	1694	0.630178	0.767316	0	0	0.928739	0.428847	RNF144A;ANKIB1;PIAS1
Regulation Of G1/S Transition Of Mitotic Cell Cycle (GO:2000045)	1695	0.630178	0.767316	0	0	0.928739	0.428847	SMARCD1;INO80;EIF4G1
Response To Tumor Necrosis Factor (GO:0034612)	1696	0.631958	0.767316	0	0	0.940887	0.431803	BAG4;MAP4K3
mRNA Export From Nucleus (GO:0006406)	1697	0.631958	0.767316	0	0	0.940887	0.431803	SMG1;ENY2
Endocytosis (GO:0006897)	1698	0.632166	0.767316	0	0	0.92266	0.423134	RALBP1;EHD4;PIK3C2A;LDLR
Phosphate-Containing Compound Metabolic Process (GO:0006796)	1699	0.632166	0.767316	0	0	0.92266	0.423134	NANP;RICTOR;PAK2;HK2
Amide Biosynthetic Process (GO:0043604)	1700	0.633036	0.767316	0	0	1.01966	0.466216	NANP
Regulation Of Microtubule-Based Process (GO:0032886)	1701	0.633036	0.767316	0	0	1.01966	0.466216	MARK4
Carbohydrate Catabolic Process (GO:0016052)	1702	0.633036	0.767316	0	0	1.01966	0.466216	HK2
Regulation Of Type I Interferon-Mediated Signaling Pathway (GO:0060338)	1703	0.633036	0.767316	0	0	1.01966	0.466216	TRIM41
Substantia Nigra Development (GO:0021762)	1704	0.633036	0.767316	0	0	1.01966	0.466216	SUDS3
Vacuolar Acidification (GO:0007035)	1705	0.633036	0.767316	0	0	1.01966	0.466216	GRN
Membrane Protein Proteolysis (GO:0033619)	1706	0.633036	0.767316	0	0	1.01966	0.466216	RHBDD1
Negative Regulation Of Cell Cycle Process (GO:0010948)	1707	0.633036	0.767316	0	0	1.01966	0.466216	FBXO5
Negative Regulation Of Mitotic Cell Cycle (GO:0045930)	1708	0.633036	0.767316	0	0	1.01966	0.466216	TRIM35
Negative Regulation Of Neuron Projection Development (GO:0010977)	1709	0.633036	0.767316	0	0	1.01966	0.466216	THY1
Negative Regulation Of Response To Stimulus (GO:0048585)	1710	0.633036	0.767316	0	0	1.01966	0.466216	THY1
Nuclear-Transcribed mRNA Catabolic Process, Nonsense-Mediated Decay (GO:0000184)	1711	0.633036	0.767316	0	0	1.01966	0.466216	SMG1
Nucleic Acid Metabolic Process (GO:0090304)	1712	0.633036	0.767316	0	0	1.01966	0.466216	PDE12
Organophosphate Biosynthetic Process (GO:0090407)	1713	0.633036	0.767316	0	0	1.01966	0.466216	GPHN
Positive Regulation Of Myeloid Cell Differentiation (GO:0045639)	1714	0.633036	0.767316	0	0	1.01966	0.466216	FOXO3
Positive Regulation Of Protein Targeting To Mitochondrion (GO:1903955)	1715	0.633036	0.767316	0	0	1.01966	0.466216	UBE2J2
Positive Regulation Of Viral Genome Replication (GO:0045070)	1716	0.633036	0.767316	0	0	1.01966	0.466216	PDE12
Positive Regulation Of Transferase Activity (GO:0051347)	1717	0.638366	0.770895	0	0	0.917037	0.411606	PNKP;MAP3K4;FGFR1
Regulation Of Protein Phosphorylation (GO:0001932)	1718	0.641926	0.770895	0	0	0.912003	0.404275	PPP1R15B;RALBP1;FAS;ILK;RASGRP1
Negative Regulation Of Intracellular Signal Transduction (GO:1902532)	1719	0.641926	0.770895	0	0	0.912003	0.404275	MGRN1;USP10;AKT1S1;TSC1;AJUBA
Regulation Of Peptidyl-Serine Phosphorylation (GO:0033135)	1720	0.641946	0.770895	0	0	0.923041	0.409139	LATS1;EIF4G1
Negative Regulation Of Canonical Wnt Signaling Pathway (GO:0090090)	1721	0.641946	0.770895	0	0	0.923041	0.409139	LATS1;LATS2
Regulation Of Cell Cycle G1/S Phase Transition (GO:1902806)	1722	0.641946	0.770895	0	0	0.923041	0.409139	SMARCD1;INO80
Regulation Of RNA Splicing (GO:0043484)	1723	0.646426	0.770895	0	0	0.905624	0.39512	ENY2;METTL4;RRP1B
Regulation Of Centrosome Duplication (GO:0010824)	1724	0.647478	0.770895	0	0	0.978771	0.425443	XRCC3
Regulation Of Exocytosis (GO:0017157)	1725	0.647478	0.770895	0	0	0.978771	0.425443	RAB33B
Apoptotic Mitochondrial Changes (GO:0008637)	1726	0.647478	0.770895	0	0	0.978771	0.425443	HK2
Regulation Of Primary Metabolic Process (GO:0080090)	1727	0.647478	0.770895	0	0	0.978771	0.425443	LDLR
Cell-Cell Junction Assembly (GO:0007043)	1728	0.647478	0.770895	0	0	0.978771	0.425443	PAK2
Regulation Of Secretion By Cell (GO:1903530)	1729	0.647478	0.770895	0	0	0.978771	0.425443	RAB33B
Cellular Response To Calcium Ion (GO:0071277)	1730	0.647478	0.770895	0	0	0.978771	0.425443	CPNE2
Regulation Of Spindle Assembly (GO:0090169)	1731	0.647478	0.770895	0	0	0.978771	0.425443	HNRNPU
Regulation Of Transcription By RNA Polymerase I (GO:0006356)	1732	0.647478	0.770895	0	0	0.978771	0.425443	FLNA
Cellular Response To Type II Interferon (GO:0071346)	1733	0.647478	0.770895	0	0	0.978771	0.425443	PDE12
Cytoplasmic Translational Initiation (GO:0002183)	1734	0.647478	0.770895	0	0	0.978771	0.425443	EIF4G1
Signal Transduction By P53 Class Mediator (GO:0072331)	1735	0.647478	0.770895	0	0	0.978771	0.425443	USP10
Steroid Metabolic Process (GO:0008202)	1736	0.647478	0.770895	0	0	0.978771	0.425443	DHCR24
Transcription By RNA Polymerase III (GO:0006383)	1737	0.647478	0.770895	0	0	0.978771	0.425443	ICE1
Transcription Initiation-Coupled Chromatin Remodeling (GO:0045815)	1738	0.647478	0.770895	0	0	0.978771	0.425443	SMARCD1
Mitochondrial Membrane Organization (GO:0007006)	1739	0.647478	0.770895	0	0	0.978771	0.425443	DNAJC11
Mitotic G2 DNA Damage Checkpoint Signaling (GO:0007095)	1740	0.647478	0.770895	0	0	0.978771	0.425443	FOXN3
Monoubiquitinated Histone H2A Deubiquitination (GO:0035522)	1741	0.647478	0.770895	0	0	0.978771	0.425443	ENY2
Monoubiquitinated Histone Deubiquitination (GO:0035521)	1742	0.647478	0.770895	0	0	0.978771	0.425443	ENY2
Negative Regulation Of Stress-Activated MAPK Cascade (GO:0032873)	1743	0.647478	0.770895	0	0	0.978771	0.425443	ZNF675
Positive Regulation Of Myoblast Differentiation (GO:0045663)	1744	0.647478	0.770895	0	0	0.978771	0.425443	SMARCD1
Positive Regulation Of Transcription By RNA Polymerase I (GO:0045943)	1745	0.647478	0.770895	0	0	0.978771	0.425443	DDX11
Protein Localization To Cilium (GO:0061512)	1746	0.647478	0.770895	0	0	0.978771	0.425443	IFT140
Regulation Of DNA Recombination (GO:0000018)	1747	0.647478	0.770895	0	0	0.978771	0.425443	MSH3
RNA Export From Nucleus (GO:0006405)	1748	0.651719	0.775501	0	0	0.905857	0.387835	SMG1;XPO5
Gene Expression (GO:0010467)	1749	0.657493	0.776744	0	0	0.908035	0.380759	RPS15;SMG1;CASP7;DHX8;HNRNPU;YARS2;AGFG1;RPS23;EIF4G1
Regulation Of Translational Initiation (GO:0006446)	1750	0.661279	0.776744	0	0	0.889297	0.367795	PPP1R15B;EIF4G1
Vesicle Fusion (GO:0006906)	1751	0.661279	0.776744	0	0	0.889297	0.367795	SAMD9;STX6
Protein Autoubiquitination (GO:0051865)	1752	0.661279	0.776744	0	0	0.889297	0.367795	UHRF1;DDB2
Regulation Of Glycolytic Process (GO:0006110)	1753	0.661353	0.776744	0	0	0.941032	0.389086	GIT1
RNA Transport (GO:0050658)	1754	0.661353	0.776744	0	0	0.941032	0.389086	XPO5
Regulation Of Insulin Receptor Signaling Pathway (GO:0046626)	1755	0.661353	0.776744	0	0	0.941032	0.389086	IRS1
TOR Signaling (GO:0031929)	1756	0.661353	0.776744	0	0	0.941032	0.389086	RICTOR
Establishment Or Maintenance Of Epithelial Cell Apical/Basal Polarity (GO:0045197)	1757	0.661353	0.776744	0	0	0.941032	0.389086	PARD6A
Mitochondrion Disassembly (GO:0061726)	1758	0.661353	0.776744	0	0	0.941032	0.389086	FBXL4
Modulation By Host Of Symbiont Process (GO:0051851)	1759	0.661353	0.776744	0	0	0.941032	0.389086	RRP1B
Muscle Contraction (GO:0006936)	1760	0.661353	0.776744	0	0	0.941032	0.389086	SLMAP
Negative Regulation Of Cold-Induced Thermogenesis (GO:0120163)	1761	0.661353	0.776744	0	0	0.941032	0.389086	NOTCH1
Negative Regulation Of Proteasomal Protein Catabolic Process (GO:1901799)	1762	0.661353	0.776744	0	0	0.941032	0.389086	LAMP3
Positive Regulation Of Cytokine-Mediated Signaling Pathway (GO:0001961)	1763	0.661353	0.776744	0	0	0.941032	0.389086	TRIM41
Positive Regulation Of Establishment Of Protein Localization To Mitochondrion (GO:1903749)	1764	0.661353	0.776744	0	0	0.941032	0.389086	UBE2J2
Positive Regulation Of Lymphocyte Differentiation (GO:0045621)	1765	0.661353	0.776744	0	0	0.941032	0.389086	SMARCD1
Positive Regulation Of miRNA Metabolic Process (GO:2000630)	1766	0.661353	0.776744	0	0	0.941032	0.389086	FOXO3
Positive Regulation Of Protein Dephosphorylation (GO:0035307)	1767	0.661353	0.776744	0	0	0.941032	0.389086	PPP1R15B
Protein K63-linked Deubiquitination (GO:0070536)	1768	0.661353	0.776744	0	0	0.941032	0.389086	MPND
Protein Methylation (GO:0006479)	1769	0.661353	0.776744	0	0	0.941032	0.389086	ICMT
Regulation Of G0 To G1 Transition (GO:0070316)	1770	0.661353	0.776744	0	0	0.941032	0.389086	SMARCD1
Regulation Of Blood Vessel Endothelial Cell Migration (GO:0043535)	1771	0.661353	0.776744	0	0	0.941032	0.389086	FGFR1
RNA Splicing (GO:0008380)	1772	0.669839	0.784428	0	0	0.873016	0.349833	DHX8;DDX23;CDK12
Regulation Of Protein Binding (GO:0043393)	1773	0.669839	0.784428	0	0	0.873016	0.349833	DDX11;SUB1;IDE
Positive Regulation Of Translation (GO:0045727)	1774	0.669839	0.784428	0	0	0.873016	0.349833	HNRNPU;LARP4B;LARP6
Positive Regulation Of Wnt Signaling Pathway (GO:0030177)	1775	0.670627	0.784428	0	0	0.873329	0.348932	TBL1XR1;ILK
DNA Geometric Change (GO:0032392)	1776	0.674683	0.784428	0	0	0.906088	0.356557	DDX11
Regulation Of Microtubule Polymerization (GO:0031113)	1777	0.674683	0.784428	0	0	0.906088	0.356557	CDK5RAP2
Regulation Of Receptor Signaling Pathway Via JAK-STAT (GO:0046425)	1778	0.674683	0.784428	0	0	0.906088	0.356557	NOTCH1
Cellular Response To Radiation (GO:0071478)	1779	0.674683	0.784428	0	0	0.906088	0.356557	INO80
Regulation Of Ubiquitin-Protein Transferase Activity (GO:0051438)	1780	0.674683	0.784428	0	0	0.906088	0.356557	FBXO5
Cellular Response To Virus (GO:0098586)	1781	0.674683	0.784428	0	0	0.906088	0.356557	RRP1B
Establishment Of Spindle Orientation (GO:0051294)	1782	0.674683	0.784428	0	0	0.906088	0.356557	CDK5RAP2
Lysosome Localization (GO:0032418)	1783	0.674683	0.784428	0	0	0.906088	0.356557	HPS6
Negative Regulation Of MAP Kinase Activity (GO:0043407)	1784	0.674683	0.784428	0	0	0.906088	0.356557	ZNF675
Negative Regulation Of Epithelial Cell Proliferation (GO:0050680)	1785	0.674683	0.784428	0	0	0.906088	0.356557	CDK6
Nucleosome Assembly (GO:0006334)	1786	0.674683	0.784428	0	0	0.906088	0.356557	CHAF1A
Peptidyl-Tyrosine Modification (GO:0018212)	1787	0.674683	0.784428	0	0	0.906088	0.356557	FGFR1
Pyruvate Metabolic Process (GO:0006090)	1788	0.674683	0.784428	0	0	0.906088	0.356557	HK2
Regulation Of Autophagosome Assembly (GO:2000785)	1789	0.674683	0.784428	0	0	0.906088	0.356557	PHF23
Positive Regulation Of NF-kappaB Transcription Factor Activity (GO:0051092)	1790	0.677387	0.786692	0	0	0.862658	0.336016	TRIM8;RBCK1;TICAM1
Protein Dephosphorylation (GO:0006470)	1791	0.677387	0.786692	0	0	0.862658	0.336016	PPP1R15B;PDPR;PPP2R5D
Regulation Of Double-Strand Break Repair Via Homologous Recombination (GO:0010569)	1792	0.679766	0.786818	0	0	0.857921	0.331164	ACTR2;EP400
Activation Of GTPase Activity (GO:0090630)	1793	0.679766	0.786818	0	0	0.857921	0.331164	TSC1;RASGRP1
Response To Lipid (GO:0033993)	1794	0.679766	0.786818	0	0	0.857921	0.331164	RPS6KA3;FOXO3
Positive Regulation Of Protein Localization (GO:1903829)	1795	0.679766	0.786818	0	0	0.857921	0.331164	PARD6A;MARK4
Positive Regulation Of Stress-Activated MAPK Cascade (GO:0032874)	1796	0.679766	0.786818	0	0	0.857921	0.331164	RASGRP1;MAP3K4
Regulation Of Cell Division (GO:0051302)	1797	0.679766	0.786818	0	0	0.857921	0.331164	KLHL21;GIT1
Protein Transport (GO:0015031)	1798	0.68698	0.787867	0	0	0.879459	0.330194	C17ORF75;CENPF;COG7;ARHGAP1;STX6;TLK1;ZDHHC17;ARCN1
DNA Damage Checkpoint Signaling (GO:0000077)	1799	0.68749	0.787867	0	0	0.87364	0.32736	ATR
DNA Damage Response, Signal Transduction By P53 Class Mediator (GO:0030330)	1800	0.68749	0.787867	0	0	0.87364	0.32736	USP10
ERBB Signaling Pathway (GO:0038127)	1801	0.68749	0.787867	0	0	0.87364	0.32736	PIK3C2A
Regulation Of Fibroblast Proliferation (GO:0048145)	1802	0.68749	0.787867	0	0	0.87364	0.32736	CDK6
Regulation Of Interleukin-2 Production (GO:0032663)	1803	0.68749	0.787867	0	0	0.87364	0.32736	RUNX1
Regulation Of Release Of Cytochrome C From Mitochondria (GO:0090199)	1804	0.68749	0.787867	0	0	0.87364	0.32736	MLLT11
Response To Glucose (GO:0009749)	1805	0.68749	0.787867	0	0	0.87364	0.32736	UNC13B
Response To Molecule Of Bacterial Origin (GO:0002237)	1806	0.68749	0.787867	0	0	0.87364	0.32736	RPS6KA3
Establishment Of Mitotic Spindle Localization (GO:0040001)	1807	0.68749	0.787867	0	0	0.87364	0.32736	CDK5RAP2
Heterochromatin Organization (GO:0070828)	1808	0.68749	0.787867	0	0	0.87364	0.32736	UHRF1
Hexose Metabolic Process (GO:0019318)	1809	0.68749	0.787867	0	0	0.87364	0.32736	HK2
Negative Regulation Of Metabolic Process (GO:0009892)	1810	0.68749	0.787867	0	0	0.87364	0.32736	NOTCH1
Plasma Membrane Bounded Cell Projection Morphogenesis (GO:0120039)	1811	0.68749	0.787867	0	0	0.87364	0.32736	DTNBP1
Positive Regulation Of B Cell Activation (GO:0050871)	1812	0.68749	0.787867	0	0	0.87364	0.32736	KMT5C
Potassium Ion Transmembrane Transport (GO:0071805)	1813	0.68749	0.787867	0	0	0.87364	0.32736	SLC9A1
Protein Destabilization (GO:0031648)	1814	0.68749	0.787867	0	0	0.87364	0.32736	ISOC2
Proton Transmembrane Transport (GO:1902600)	1815	0.68749	0.787867	0	0	0.87364	0.32736	SLC9A1
Regulation Of mRNA Stability (GO:0043488)	1816	0.688696	0.787947	0	0	0.843044	0.314417	PDE12;HNRNPU
Aerobic Electron Transport Chain (GO:0019646)	1817	0.688696	0.787947	0	0	0.843044	0.314417	UQCC3;NDUFV3
Negative Regulation Of Transmembrane Receptor Protein Serine/Threonine Kinase Signaling Pathway (GO:0090101)	1818	0.688696	0.787947	0	0	0.843044	0.314417	NOTCH1;SUDS3
Inorganic Cation Transmembrane Transport (GO:0098662)	1819	0.692099	0.79097	0	0	0.842656	0.31012	TRPM2;ABCB8;SLC9A1
Monoatomic Cation Transmembrane Transport (GO:0098655)	1820	0.692099	0.79097	0	0	0.842656	0.31012	TRPM2;ABCB8;SLC9A1
Mitochondrial ATP Synthesis Coupled Electron Transport (GO:0042775)	1821	0.697422	0.796616	0	0	0.828672	0.298624	UQCC3;NDUFV3
Regulation Of Endopeptidase Activity (GO:0052548)	1822	0.699794	0.7967	0	0	0.84343	0.301079	SERPINF1
Ceramide Metabolic Process (GO:0006672)	1823	0.699794	0.7967	0	0	0.84343	0.301079	NSMAF
Response To Type II Interferon (GO:0034341)	1824	0.699794	0.7967	0	0	0.84343	0.301079	PDE12
mRNA Stabilization (GO:0048255)	1825	0.699794	0.7967	0	0	0.84343	0.301079	HNRNPU
Positive Regulation Of NIK/NF-kappaB Signaling (GO:1901224)	1826	0.699794	0.7967	0	0	0.84343	0.301079	ILK
Protein Transmembrane Import Into Intracellular Organelle (GO:0044743)	1827	0.699794	0.7967	0	0	0.84343	0.301079	PEX6
RNA Metabolic Process (GO:0016070)	1828	0.706301	0.803669	0	0	0.823554	0.286361	DHX8;AGO1;HNRNPU
Positive Regulation Of GTPase Activity (GO:0043547)	1829	0.711276	0.804433	0	0	0.827823	0.282035	RALBP1;TSC1;THY1;RASGRP1
Rho Protein Signal Transduction (GO:0007266)	1830	0.711614	0.804433	0	0	0.815233	0.277358	ARHGAP1
Regulation Of Interleukin-1 Beta Production (GO:0032651)	1831	0.711614	0.804433	0	0	0.815233	0.277358	GIT1
Regulation Of Intracellular Protein Transport (GO:0033157)	1832	0.711614	0.804433	0	0	0.815233	0.277358	ICE1
Axonal Transport (GO:0098930)	1833	0.711614	0.804433	0	0	0.815233	0.277358	DTNBP1
Cholesterol Homeostasis (GO:0042632)	1834	0.711614	0.804433	0	0	0.815233	0.277358	LDLR
Mitochondrial Electron Transport, NADH To Ubiquinone (GO:0006120)	1835	0.711614	0.804433	0	0	0.815233	0.277358	NDUFV3
Negative Regulation Of I-kappaB kinase/NF-kappaB Signaling (GO:0043124)	1836	0.711614	0.804433	0	0	0.815233	0.277358	USP10
Negative Regulation Of Cellular Response To Growth Factor Stimulus (GO:0090288)	1837	0.711614	0.804433	0	0	0.815233	0.277358	NOTCH1
Negative Regulation Of Neuron Apoptotic Process (GO:0043524)	1838	0.711614	0.804433	0	0	0.815233	0.277358	GRN
Positive Regulation Of Chromosome Organization (GO:2001252)	1839	0.711614	0.804433	0	0	0.815233	0.277358	DDX11
Positive Regulation Of Intracellular Transport (GO:0032388)	1840	0.711614	0.804433	0	0	0.815233	0.277358	ICE1
MAPK Cascade (GO:0000165)	1841	0.714265	0.806116	0	0	0.801341	0.269652	MAP3K4;FGFR1
T Cell Activation (GO:0042110)	1842	0.714265	0.806116	0	0	0.801341	0.269652	CTPS1;RASGRP1
Positive Regulation Of Amide Metabolic Process (GO:0034250)	1843	0.714265	0.806116	0	0	0.801341	0.269652	LARP4B;LARP6
Negative Regulation Of Protein Metabolic Process (GO:0051248)	1844	0.719998	0.808048	0	0	0.805291	0.264544	FLNA;TSC1;LDLR
Regulation Of Cytoskeleton Organization (GO:0051493)	1845	0.722389	0.808048	0	0	0.788336	0.256361	RICTOR;PAK2
Macromolecule Catabolic Process (GO:0009057)	1846	0.722389	0.808048	0	0	0.788336	0.256361	CASP7;IDE
G2/M Transition Of Mitotic Cell Cycle (GO:0000086)	1847	0.72297	0.808048	0	0	0.788856	0.255895	LATS1
Regulation Of Protein Import Into Nucleus (GO:0042306)	1848	0.72297	0.808048	0	0	0.788856	0.255895	FLNA
Spliceosomal snRNP Assembly (GO:0000387)	1849	0.72297	0.808048	0	0	0.788856	0.255895	GEMIN7
Sterol Homeostasis (GO:0055092)	1850	0.72297	0.808048	0	0	0.788856	0.255895	LDLR
Internal Peptidyl-Lysine Acetylation (GO:0018393)	1851	0.72297	0.808048	0	0	0.788856	0.255895	EP400
Monoubiquitinated Protein Deubiquitination (GO:0035520)	1852	0.72297	0.808048	0	0	0.788856	0.255895	ENY2
Nuclear-Transcribed mRNA Catabolic Process, Deadenylation-Dependent Decay (GO:0000288)	1853	0.72297	0.808048	0	0	0.788856	0.255895	PDE12
Peptidyl-Tyrosine Phosphorylation (GO:0018108)	1854	0.72297	0.808048	0	0	0.788856	0.255895	FGFR1
Phagocytosis (GO:0006909)	1855	0.72297	0.808048	0	0	0.788856	0.255895	LDLR
Positive Regulation Of T Cell Proliferation (GO:0042102)	1856	0.72297	0.808048	0	0	0.788856	0.255895	CD70
Positive Regulation Of Cell Cycle G1/S Phase Transition (GO:1902808)	1857	0.72297	0.808048	0	0	0.788856	0.255895	EIF4G1
Positive Regulation Of Interleukin-6 Production (GO:0032755)	1858	0.72297	0.808048	0	0	0.788856	0.255895	IL17RA
protein-DNA Complex Assembly (GO:0065004)	1859	0.72297	0.808048	0	0	0.788856	0.255895	CHAF1A
Regulation Of T Cell Activation (GO:0050863)	1860	0.72297	0.808048	0	0	0.788856	0.255895	THY1
Regulation Of T Cell Differentiation (GO:0045580)	1861	0.72297	0.808048	0	0	0.788856	0.255895	SMARCD1
Cellular Response To Starvation (GO:0009267)	1862	0.726658	0.811298	0	0	0.796457	0.254309	FAS;FOXO3;XPR1
Positive Regulation Of Hydrolase Activity (GO:0051345)	1863	0.726658	0.811298	0	0	0.796457	0.254309	RALBP1;THY1;RASGRP1
Endoplasmic Reticulum To Golgi Vesicle-Mediated Transport (GO:0006888)	1864	0.733193	0.816295	0	0	0.787814	0.244495	SEC24D;SEC22C;ARCN1
Negative Regulation Of DNA-binding Transcription Factor Activity (GO:0043433)	1865	0.733193	0.816295	0	0	0.787814	0.244495	FLNA;RBCK1;ZNF675
Regulation Of Insulin Secretion (GO:0050796)	1866	0.73388	0.816295	0	0	0.764128	0.236428	IRS1
Regulation Of miRNA Transcription (GO:1902893)	1867	0.73388	0.816295	0	0	0.764128	0.236428	FOXO3
Regulation Of Mitochondrion Organization (GO:0010821)	1868	0.73388	0.816295	0	0	0.764128	0.236428	PRMT6
Response To Interleukin-1 (GO:0070555)	1869	0.73388	0.816295	0	0	0.764128	0.236428	USP10
Positive Regulation Of Catalytic Activity (GO:0043085)	1870	0.73388	0.816295	0	0	0.764128	0.236428	MSH3
Regulation Of JNK Cascade (GO:0046328)	1871	0.738051	0.820446	0	0	0.763547	0.231921	ZNF675;RASGRP1
Positive Regulation Of Protein Modification Process (GO:0031401)	1872	0.740338	0.820446	0	0	0.79377	0.238646	RALBP1;FAS;ILK;RASGRP1
COPII-coated Vesicle Budding (GO:0090114)	1873	0.744362	0.820446	0	0	0.740898	0.218734	SEC24D
Regulation Of Interferon-Beta Production (GO:0032648)	1874	0.744362	0.820446	0	0	0.740898	0.218734	POLR3D
Regulation Of Mitotic Spindle Organization (GO:0060236)	1875	0.744362	0.820446	0	0	0.740898	0.218734	HNRNPU
Calcium-Mediated Signaling (GO:0019722)	1876	0.744362	0.820446	0	0	0.740898	0.218734	SLC9A1
Regulation Of Protein Dephosphorylation (GO:0035304)	1877	0.744362	0.820446	0	0	0.740898	0.218734	TSC1
Cell Cycle G2/M Phase Transition (GO:0044839)	1878	0.744362	0.820446	0	0	0.740898	0.218734	LATS1
Cellular Response To Glucose Starvation (GO:0042149)	1879	0.744362	0.820446	0	0	0.740898	0.218734	FOXO3
Regulation Of Tumor Necrosis Factor-Mediated Signaling Pathway (GO:0010803)	1880	0.744362	0.820446	0	0	0.740898	0.218734	ZNF675
Stress-Activated MAPK Cascade (GO:0051403)	1881	0.744362	0.820446	0	0	0.740898	0.218734	MAP4K3
Glycerophospholipid Metabolic Process (GO:0006650)	1882	0.744362	0.820446	0	0	0.740898	0.218734	PNPLA6
Histone H3 Acetylation (GO:0043966)	1883	0.744362	0.820446	0	0	0.740898	0.218734	ENY2
mRNA Destabilization (GO:0061157)	1884	0.744362	0.820446	0	0	0.740898	0.218734	PDE12
Positive Regulation Of Nucleocytoplasmic Transport (GO:0046824)	1885	0.744362	0.820446	0	0	0.740898	0.218734	FLNA
Positive Regulation Of Viral Process (GO:0048524)	1886	0.744362	0.820446	0	0	0.740898	0.218734	PDE12
T Cell Receptor Signaling Pathway (GO:0050852)	1887	0.745597	0.820446	0	0	0.751724	0.220684	RBCK1;THY1
Regulation Of Anatomical Structure Morphogenesis (GO:0022603)	1888	0.745597	0.820446	0	0	0.751724	0.220684	PDLIM5;PAK2
Regulation Of Cell Adhesion (GO:0030155)	1889	0.745597	0.820446	0	0	0.751724	0.220684	SPN;PLXNA1
Golgi Organization (GO:0007030)	1890	0.745895	0.820446	0	0	0.771072	0.226055	PI4K2B;COG8;COG7
Positive Regulation Of Intracellular Protein Transport (GO:0090316)	1891	0.745895	0.820446	0	0	0.771072	0.226055	ICE1;FLNA;UBE2J2
Negative Regulation Of Cellular Process (GO:0048523)	1892	0.746577	0.820761	0	0	0.839889	0.245463	SPN;ING5;SMARCD1;ZBTB17;CDK6;NOTCH1;PLXNA1;TNFRSF8;TSC1;CDC6
Positive Regulation Of Cell Differentiation (GO:0045597)	1893	0.751326	0.825035	0	0	0.780911	0.223275	RPS6KA3;SMARCD1;FBXO5;FGFR1
Regulation Of Protein Kinase B Signaling (GO:0051896)	1894	0.752955	0.825035	0	0	0.74026	0.210048	RICTOR;FGFR1
Positive Regulation Of Protein Ubiquitination (GO:0031398)	1895	0.752955	0.825035	0	0	0.74026	0.210048	FANCI;PHF23
Regulation Of Immune Response (GO:0050776)	1896	0.754431	0.825035	0	0	0.719035	0.202618	SPN
Regulation Of Phosphatidylinositol 3-Kinase Signaling (GO:0014066)	1897	0.754431	0.825035	0	0	0.719035	0.202618	FGFR1
Cellular Response To Interleukin-1 (GO:0071347)	1898	0.754431	0.825035	0	0	0.719035	0.202618	USP10
Regulation Of Ubiquitin-Dependent Protein Catabolic Process (GO:2000058)	1899	0.754431	0.825035	0	0	0.719035	0.202618	LATS1
Response To Amino Acid Starvation (GO:1990928)	1900	0.754431	0.825035	0	0	0.719035	0.202618	FAS
Negative Regulation Of Cytokine-Mediated Signaling Pathway (GO:0001960)	1901	0.754431	0.825035	0	0	0.719035	0.202618	ZNF675
Positive Regulation Of Lymphocyte Proliferation (GO:0050671)	1902	0.754431	0.825035	0	0	0.719035	0.202618	CD70
mRNA Splicing, Via Spliceosome (GO:0000398)	1903	0.757647	0.828117	0	0	0.799364	0.221853	IK;DHX8;DDX23;HNRNPU;GEMIN7;U2AF1L4
Positive Regulation Of Cytokine Production (GO:0001819)	1904	0.758557	0.828675	0	0	0.786761	0.217412	CD226;TICAM1;RASGRP1;RUNX1;IL17RA
Fatty Acid Metabolic Process (GO:0006631)	1905	0.76013	0.829522	0	0	0.729138	0.199978	GGT1;ACADSB
Vesicle Organization (GO:0016050)	1906	0.76013	0.829522	0	0	0.729138	0.199978	PI4K2B;STX6
Regulation Of Mitotic Cell Cycle (GO:0007346)	1907	0.764039	0.830809	0	0	0.747241	0.201109	TRIM35;HNRNPU;FBXO5
Mitotic Sister Chromatid Segregation (GO:0000070)	1908	0.764039	0.830809	0	0	0.747241	0.201109	FLNA;INO80;SMC3
Positive Regulation Of Cell Motility (GO:2000147)	1909	0.764039	0.830809	0	0	0.747241	0.201109	SEMA4A;GRN;NOTCH1
T Cell Differentiation (GO:0030217)	1910	0.764105	0.830809	0	0	0.69842	0.18791	USP44
Cellular Response To Amino Acid Starvation (GO:0034198)	1911	0.764105	0.830809	0	0	0.69842	0.18791	FAS
Vacuolar Transport (GO:0007034)	1912	0.764105	0.830809	0	0	0.69842	0.18791	GRN
Positive Regulation Of Endothelial Cell Proliferation (GO:0001938)	1913	0.764105	0.830809	0	0	0.69842	0.18791	FGFR1
Negative Regulation Of Wnt Signaling Pathway (GO:0030178)	1914	0.767124	0.83322	0	0	0.718343	0.190438	LATS1;LATS2
Plasma Membrane Bounded Cell Projection Organization (GO:0120036)	1915	0.767124	0.83322	0	0	0.718343	0.190438	DTNBP1;MARK4
Positive Regulation Of Cell Migration (GO:0030335)	1916	0.772226	0.838325	0	0	0.75639	0.19551	SEMA4A;GRN;NOTCH1;FBXO5
Membrane Fission (GO:0090148)	1917	0.773398	0.839159	0	0	0.678952	0.174464	EXOC2
Positive Regulation Of Protein Secretion (GO:0050714)	1918	0.782327	0.847079	0	0	0.660535	0.16215	UNC13B
Positive Regulation Of Proteolysis (GO:0045862)	1919	0.782327	0.847079	0	0	0.660535	0.16215	RHBDD1
Proton Motive Force-Driven Mitochondrial ATP Synthesis (GO:0042776)	1920	0.782327	0.847079	0	0	0.660535	0.16215	NDUFV3
Regulation Of Alternative mRNA Splicing, Via Spliceosome (GO:0000381)	1921	0.782327	0.847079	0	0	0.660535	0.16215	HNRNPU
Cellular Response To Oxygen-Containing Compound (GO:1901701)	1922	0.783265	0.847655	0	0	0.773513	0.188957	CASP7;TRIM41;IRS1;CPNE2;TICAM1;GIT1
Regulation Of Inflammatory Response (GO:0050727)	1923	0.786582	0.850801	0	0	0.717647	0.172277	GRN;GGT1;IL17RA
Mitotic Spindle Organization (GO:0007052)	1924	0.787051	0.850866	0	0	0.687782	0.164698	FLNA;SMC3
DNA Duplex Unwinding (GO:0032508)	1925	0.790904	0.8537	0	0	0.643088	0.150855	DDX11
Negative Regulation Of TOR Signaling (GO:0032007)	1926	0.790904	0.8537	0	0	0.643088	0.150855	TSC1
Proton Motive Force-Driven ATP Synthesis (GO:0015986)	1927	0.790904	0.8537	0	0	0.643088	0.150855	NDUFV3
Positive Regulation Of DNA-binding Transcription Factor Activity (GO:0051091)	1928	0.791725	0.854144	0	0	0.733343	0.171265	TRIM8;RBCK1;PPRC1;TICAM1
Ribosomal Small Subunit Biogenesis (GO:0042274)	1929	0.793353	0.855456	0	0	0.678161	0.156986	RPS15;RPS23
Protein Localization To Organelle (GO:0033365)	1930	0.797169	0.857699	0	0	0.703704	0.159522	COG7;IFT140;RAB33B
Regulation Of Proteasomal Protein Catabolic Process (GO:0061136)	1931	0.799144	0.857699	0	0	0.626536	0.140478	LAMP3
Endoplasmic Reticulum Organization (GO:0007029)	1932	0.799144	0.857699	0	0	0.626536	0.140478	BNIP1
Endosome To Lysosome Transport (GO:0008333)	1933	0.799144	0.857699	0	0	0.626536	0.140478	MGRN1
Fatty Acid Oxidation (GO:0019395)	1934	0.799144	0.857699	0	0	0.626536	0.140478	ACAT2
Wound Healing (GO:0042060)	1935	0.799144	0.857699	0	0	0.626536	0.140478	C6ORF89
Mitotic Nuclear Division (GO:0140014)	1936	0.799144	0.857699	0	0	0.626536	0.140478	INO80
Nuclear Export (GO:0051168)	1937	0.799144	0.857699	0	0	0.626536	0.140478	XPO5
Positive Regulation Of Protein Polymerization (GO:0032273)	1938	0.799144	0.857699	0	0	0.626536	0.140478	CDK5RAP2
Regulation Of Macroautophagy (GO:0016241)	1939	0.805465	0.861306	0	0	0.659699	0.142717	QSOX1;TSC1
Organic Substance Transport (GO:0071702)	1940	0.805465	0.861306	0	0	0.659699	0.142717	CENPF;CACNB3
Protein Homooligomerization (GO:0051260)	1941	0.805465	0.861306	0	0	0.659699	0.142717	EHD4;PXDN
Golgi To Plasma Membrane Transport (GO:0006893)	1942	0.80706	0.861306	0	0	0.610811	0.130931	EXOC2
RNA Polymerase II Preinitiation Complex Assembly (GO:0051123)	1943	0.80706	0.861306	0	0	0.610811	0.130931	MED17
Cell-Cell Adhesion Via Plasma-Membrane Adhesion Molecules (GO:0098742)	1944	0.80706	0.861306	0	0	0.610811	0.130931	ROBO3
Endosome Organization (GO:0007032)	1945	0.80706	0.861306	0	0	0.610811	0.130931	PI4K2B
Establishment Of Protein Localization To Mitochondrion (GO:0072655)	1946	0.80706	0.861306	0	0	0.610811	0.130931	HK2
Negative Regulation Of Protein Ubiquitination (GO:0031397)	1947	0.80706	0.861306	0	0	0.610811	0.130931	FBXO5
Negative Regulation Of Supramolecular Fiber Organization (GO:1902904)	1948	0.80706	0.861306	0	0	0.610811	0.130931	LDLR
Organic Anion Transport (GO:0015711)	1949	0.80706	0.861306	0	0	0.610811	0.130931	SLC2A3
Regulation Of Embryonic Development (GO:0045995)	1950	0.814665	0.865868	0	0	0.595853	0.122137	INO80
Regulation Of Endothelial Cell Migration (GO:0010594)	1951	0.814665	0.865868	0	0	0.595853	0.122137	GRN
Epithelial Cell Differentiation (GO:0030855)	1952	0.814665	0.865868	0	0	0.595853	0.122137	LATS1
Lipid Biosynthetic Process (GO:0008610)	1953	0.814665	0.865868	0	0	0.595853	0.122137	GPAT4
Negative Regulation Of Innate Immune Response (GO:0045824)	1954	0.814665	0.865868	0	0	0.595853	0.122137	GRN
Negative Regulation Of Viral Process (GO:0048525)	1955	0.814665	0.865868	0	0	0.595853	0.122137	HEXIM1
Purine Ribonucleotide Metabolic Process (GO:0009150)	1956	0.814665	0.865868	0	0	0.595853	0.122137	GPAT4
Regulation Of Actin Filament-Based Process (GO:0032970)	1957	0.814665	0.865868	0	0	0.595853	0.122137	RICTOR
Negative Regulation Of Gene Expression (GO:0010629)	1958	0.81778	0.868735	0	0	0.737675	0.148392	TWSG1;DNMT1;NOTCH1;SFMBT2;ZNF281;TSC1
Endomembrane System Organization (GO:0010256)	1959	0.818444	0.868996	0	0	0.701261	0.140498	PI4K2B;COG8;COG7;BNIP1
Regulation Of Peptidyl-Tyrosine Phosphorylation (GO:0050730)	1960	0.821971	0.871027	0	0	0.581608	0.114024	PAK2
Transforming Growth Factor Beta Receptor Signaling Pathway (GO:0007179)	1961	0.821971	0.871027	0	0	0.581608	0.114024	TWSG1
Positive Regulation Of Cytoskeleton Organization (GO:0051495)	1962	0.821971	0.871027	0	0	0.581608	0.114024	PLK4
Lysosomal Transport (GO:0007041)	1963	0.82245	0.871027	0	0	0.633805	0.123888	GRN;MGRN1
Neuron Development (GO:0048666)	1964	0.82245	0.871027	0	0	0.633805	0.123888	DTNBP1;RUNX1
Response To Cytokine (GO:0034097)	1965	0.82781	0.875279	0	0	0.625616	0.118224	LAMP3;MAP4K3
Transcription Preinitiation Complex Assembly (GO:0070897)	1966	0.82899	0.875279	0	0	0.568025	0.106532	MED17
Metal Ion Transport (GO:0030001)	1967	0.82899	0.875279	0	0	0.568025	0.106532	CACNB3
Negative Regulation Of Cellular Catabolic Process (GO:0031330)	1968	0.82899	0.875279	0	0	0.568025	0.106532	EIF4G1
Positive Regulation Of JNK Cascade (GO:0046330)	1969	0.82899	0.875279	0	0	0.568025	0.106532	RASGRP1
Post-Translational Protein Modification (GO:0043687)	1970	0.82899	0.875279	0	0	0.568025	0.106532	RHBDD1
Regulation Of Neuron Projection Development (GO:0010975)	1971	0.833024	0.879092	0	0	0.617634	0.112837	PDLIM5;PAK2
Regulation Of Type I Interferon Production (GO:0032479)	1972	0.835732	0.88061	0	0	0.555059	0.0996036	TICAM1
Negative Regulation Of Cell Death (GO:0060548)	1973	0.835732	0.88061	0	0	0.555059	0.0996036	EIF4G1
Oxidative Phosphorylation (GO:0006119)	1974	0.835732	0.88061	0	0	0.555059	0.0996036	NDUFV3
Cellular Response To Oxidative Stress (GO:0034599)	1975	0.838095	0.882652	0	0	0.609852	0.107714	SRXN1;FOXO3
Regulation Of Protein Secretion (GO:0050708)	1976	0.84221	0.882962	0	0	0.54267	0.0931907	UNC13B
Cellular Response To Hypoxia (GO:0071456)	1977	0.84221	0.882962	0	0	0.54267	0.0931907	NOTCH1
Lipid Transport (GO:0006869)	1978	0.84221	0.882962	0	0	0.54267	0.0931907	LDLR
Mitotic DNA Damage Checkpoint Signaling (GO:0044773)	1979	0.84221	0.882962	0	0	0.54267	0.0931907	FOXN3
Negative Regulation Of Protein Modification Process (GO:0031400)	1980	0.84221	0.882962	0	0	0.54267	0.0931907	PPP1R15B
Nucleocytoplasmic Transport (GO:0006913)	1981	0.84221	0.882962	0	0	0.54267	0.0931907	CDAN1
Peptidyl-Threonine Phosphorylation (GO:0018107)	1982	0.84221	0.882962	0	0	0.54267	0.0931907	OXSR1
Positive Regulation Of Peptidyl-Tyrosine Phosphorylation (GO:0050731)	1983	0.84221	0.882962	0	0	0.54267	0.0931907	PAK2
Positive Regulation Of Transcription Initiation By RNA Polymerase II (GO:0060261)	1984	0.84221	0.882962	0	0	0.54267	0.0931907	MED17
Antigen Receptor-Mediated Signaling Pathway (GO:0050851)	1985	0.843027	0.883373	0	0	0.602262	0.10284	RBCK1;THY1
Macromolecule Biosynthetic Process (GO:0009059)	1986	0.845991	0.886032	0	0	0.667164	0.111581	RPS15;YARS2;EIF4G1;RPS23
Negative Regulation Of Translation (GO:0017148)	1987	0.847822	0.886803	0	0	0.594858	0.098202	TSC1;EIF4G1
Metaphase Plate Congression (GO:0051310)	1988	0.848432	0.886803	0	0	0.530819	0.0872482	CENPF
Negative Regulation Of Protein Binding (GO:0032091)	1989	0.848432	0.886803	0	0	0.530819	0.0872482	DDX11
Positive Regulation Of DNA-templated Transcription Initiation (GO:2000144)	1990	0.848432	0.886803	0	0	0.530819	0.0872482	MED17
Cytoplasmic Translation (GO:0002181)	1991	0.852483	0.89059	0	0	0.587631	0.0937868	RPS15;RPS23
Regulation Of Phosphorylation (GO:0042325)	1992	0.85441	0.891707	0	0	0.519473	0.0817361	ILK
Organelle Disassembly (GO:1903008)	1993	0.85441	0.891707	0	0	0.519473	0.0817361	ULK3
NADH Dehydrogenase Complex Assembly (GO:0010257)	1994	0.860152	0.893181	0	0	0.5086	0.0766184	LYRM2
Regulation Of Interleukin-6 Production (GO:0032675)	1995	0.860152	0.893181	0	0	0.5086	0.0766184	IL17RA
mRNA Transport (GO:0051028)	1996	0.860152	0.893181	0	0	0.5086	0.0766184	SMG1
Mitochondrial Respiratory Chain Complex I Assembly (GO:0032981)	1997	0.860152	0.893181	0	0	0.5086	0.0766184	LYRM2
Negative Regulation Of Transforming Growth Factor Beta Receptor Signaling Pathway (GO:0030512)	1998	0.860152	0.893181	0	0	0.5086	0.0766184	SUDS3
post-Golgi Vesicle-Mediated Transport (GO:0006892)	1999	0.860152	0.893181	0	0	0.5086	0.0766184	EXOC2
[truncated: 81 more rows]
